# Supplementary material
Source: publisher figshare collection journal article supplement (https://gsajournals.figshare.com/articles/dataset/_/8114123)
Supplement: Supplementary file 1 [file 1]

## Sheet: Elaeis vs Trichopus
Table S9A. Collinear genes between E. guieensis and T. zeylanicus
############### Parameters ###############
# MATCH_SCORE: 50
# MATCH_SIZE: 5
# GAP_PENALTY: -1
# OVERLAP_WINDOW: 5
# E_VALUE: 1e-05
# MAX GAPS: 25
############### Statistics ###############
# Number of collinear genes: 25891, Percentage: 34.53
# Number of all genes: 74981
##########################################
## Alignment 0: score=404.0 e_value=4.4e-18 N=9 NC_025993.1&jcf7180002706646 plus
0- 0:	XP_010939250.1	evm.model.jcf7180002706646.34	8e-17
0- 1:	XP_019708041.1	evm.model.jcf7180002706646.38	3e-30
0- 2:	XP_010939106.1	evm.model.jcf7180002706646.42	2e-72
0- 3:	XP_010939078.1	evm.model.jcf7180002706646.44	6e-50
0- 4:	XP_010939040.1	evm.model.jcf7180002706646.47	0
0- 5:	XP_019709246.1	evm.model.jcf7180002706646.57	1e-11
0- 6:	XP_010938815.1	evm.model.jcf7180002706646.60	8e-105
0- 7:	XP_010938783.1	evm.model.jcf7180002706646.61	0
0- 8:	XP_019705906.1	evm.model.jcf7180002706646.62	1e-118
## Alignment 1: score=623.0 e_value=4.4e-34 N=14 NC_025993.1&jcf7180002757809 minus
1- 0:	XP_010933720.1	evm.model.jcf7180002757809.74	0
1- 1:	XP_010933774.1	evm.model.jcf7180002757809.37	0
1- 2:	XP_010933786.1	evm.model.jcf7180002757809.36	0
1- 3:	XP_019708343.1	evm.model.jcf7180002757809.31	7e-32
1- 4:	XP_019703972.1	evm.model.jcf7180002757809.30	5e-114
1- 5:	XP_019705670.1	evm.model.jcf7180002757809.27	9e-23
1- 6:	XP_010933997.1	evm.model.jcf7180002757809.24	9e-54
1- 7:	XP_010934047.1	evm.model.jcf7180002757809.22	3e-88
1- 8:	XP_010934067.2	evm.model.jcf7180002757809.21	3e-124
1- 9:	XP_010934110.1	evm.model.jcf7180002757809.18	7e-15
1- 10:	XP_010934161.1	evm.model.jcf7180002757809.17	0
1- 11:	XP_010934223.1	evm.model.jcf7180002757809.16	0
1- 12:	XP_010934234.1	evm.model.jcf7180002757809.11	1e-33
1- 13:	XP_010934404.1	evm.model.jcf7180002757809.5	1e-163
## Alignment 2: score=252.0 e_value=6.4e-11 N=6 NC_025993.1&jcf7180002757809 minus
2- 0:	XP_010917562.1	evm.model.jcf7180002757809.214	1e-108
2- 1:	XP_010920705.1	evm.model.jcf7180002757809.206	8e-47
2- 2:	XP_010920675.1	evm.model.jcf7180002757809.205	6e-98
2- 3:	XP_010920465.1	evm.model.jcf7180002757809.191	3e-64
2- 4:	XP_010920455.1	evm.model.jcf7180002757809.190	2e-153
2- 5:	XP_010920360.1	evm.model.jcf7180002757809.188	6e-113
## Alignment 3: score=433.0 e_value=2.2e-20 N=10 NC_025993.1&jcf7180002757852 plus
3- 0:	XP_010906542.1	evm.model.jcf7180002757852.76	4e-112
3- 1:	XP_010906604.1	evm.model.jcf7180002757852.80	8e-126
3- 2:	XP_019705747.1	evm.model.jcf7180002757852.84	7e-73
3- 3:	XP_010906776.1	evm.model.jcf7180002757852.85	0
3- 4:	XP_010906788.1	evm.model.jcf7180002757852.86	2e-100
3- 5:	XP_010906836.1	evm.model.jcf7180002757852.89	0.07
3- 6:	XP_010906959.1	evm.model.jcf7180002757852.99	4e-153
3- 7:	XP_010907128.1	evm.model.jcf7180002757852.105	0
3- 8:	XP_010907163.1	evm.model.jcf7180002757852.106	0
3- 9:	XP_010907173.1	evm.model.jcf7180002757852.111	4e-77
## Alignment 4: score=1427.0 e_value=1.6e-100 N=31 NC_025993.1&jcf7180002757865 minus
4- 0:	XP_010933501.1	evm.model.jcf7180002757865.106	0
4- 1:	XP_010933553.1	evm.model.jcf7180002757865.103	5e-124
4- 2:	XP_010933563.1	evm.model.jcf7180002757865.102	1e-48
4- 3:	XP_010933574.1	evm.model.jcf7180002757865.97	0
4- 4:	XP_010933597.1	evm.model.jcf7180002757865.91	5e-164
4- 5:	XP_019701475.1	evm.model.jcf7180002757865.87	2e-174
4- 6:	XP_010933750.1	evm.model.jcf7180002757865.85	4e-145
4- 7:	XP_010933848.1	evm.model.jcf7180002757865.82	1e-135
4- 8:	XP_019703972.1	evm.model.jcf7180002757865.80	3e-120
4- 9:	XP_010935456.1	evm.model.jcf7180002757865.78	3e-70
4- 10:	XP_010933941.1	evm.model.jcf7180002757865.70	3e-56
4- 11:	XP_010934023.1	evm.model.jcf7180002757865.67	0
4- 12:	XP_010934035.1	evm.model.jcf7180002757865.66	9e-67
4- 13:	XP_010934047.1	evm.model.jcf7180002757865.64	2e-107
4- 14:	XP_010934120.1	evm.model.jcf7180002757865.56	4e-15
4- 15:	XP_010934161.1	evm.model.jcf7180002757865.55	0
4- 16:	XP_010934174.1	evm.model.jcf7180002757865.53	1e-37
4- 17:	XP_010934434.1	evm.model.jcf7180002757865.49	4e-71
4- 18:	XP_010934539.1	evm.model.jcf7180002757865.44	0
4- 19:	XP_019702372.1	evm.model.jcf7180002757865.36	0
4- 20:	XP_010934659.1	evm.model.jcf7180002757865.34	1e-71
4- 21:	XP_010934670.1	evm.model.jcf7180002757865.33	0
4- 22:	XP_019704532.1	evm.model.jcf7180002757865.31	3e-66
4- 23:	XP_010935517.1	evm.model.jcf7180002757865.30	0
4- 24:	XP_010934754.1	evm.model.jcf7180002757865.28	2e-80
4- 25:	XP_010934792.1	evm.model.jcf7180002757865.27	0
4- 26:	XP_010934822.1	evm.model.jcf7180002757865.24	2e-133
4- 27:	XP_019710571.1	evm.model.jcf7180002757865.22	3e-104
4- 28:	XP_010934893.2	evm.model.jcf7180002757865.21	4e-70
4- 29:	XP_010934915.1	evm.model.jcf7180002757865.20	0
4- 30:	XP_010934941.1	evm.model.jcf7180002757865.19	0
## Alignment 5: score=597.0 e_value=5.7e-31 N=13 NC_025993.1&jcf7180002757872 minus
5- 0:	XP_010939287.1	evm.model.jcf7180002757872.49	0
5- 1:	XP_010939263.1	evm.model.jcf7180002757872.46	5e-40
5- 2:	XP_010939250.1	evm.model.jcf7180002757872.44	5e-16
5- 3:	XP_010939216.1	evm.model.jcf7180002757872.41	0
5- 4:	XP_010939205.1	evm.model.jcf7180002757872.40	2e-101
5- 5:	XP_010939078.1	evm.model.jcf7180002757872.30	2e-27
5- 6:	XP_010939031.1	evm.model.jcf7180002757872.28	2e-121
5- 7:	XP_019706886.1	evm.model.jcf7180002757872.23	2e-78
5- 8:	XP_010938921.1	evm.model.jcf7180002757872.22	8e-19
5- 9:	XP_010938904.1	evm.model.jcf7180002757872.19	2e-116
5- 10:	XP_019705906.1	evm.model.jcf7180002757872.11	0
5- 11:	XP_019706887.1	evm.model.jcf7180002757872.8	7e-155
5- 12:	XP_010938751.1	evm.model.jcf7180002757872.7	3e-67
## Alignment 6: score=622.0 e_value=1.7e-35 N=14 NC_025993.1&jcf7180002757878 plus
6- 0:	XP_010931261.1	evm.model.jcf7180002757878.16	1e-86
6- 1:	XP_010932028.1	evm.model.jcf7180002757878.25	1e-22
6- 2:	XP_019706618.1	evm.model.jcf7180002757878.31	7e-176
6- 3:	XP_010931141.1	evm.model.jcf7180002757878.33	2e-23
6- 4:	XP_010931017.1	evm.model.jcf7180002757878.35	4e-158
6- 5:	XP_010930886.1	evm.model.jcf7180002757878.51	2e-52
6- 6:	XP_010930863.1	evm.model.jcf7180002757878.56	5e-102
6- 7:	XP_010930815.1	evm.model.jcf7180002757878.57	0
6- 8:	XP_010930697.1	evm.model.jcf7180002757878.68	0
6- 9:	XP_010930685.1	evm.model.jcf7180002757878.73	1e-30
6- 10:	XP_010930664.1	evm.model.jcf7180002757878.89	0
6- 11:	XP_010930651.1	evm.model.jcf7180002757878.91	3e-67
6- 12:	XP_010930456.1	evm.model.jcf7180002757878.96	2e-49
6- 13:	XP_010930434.1	evm.model.jcf7180002757878.97	0
## Alignment 7: score=368.0 e_value=5.9e-16 N=8 NC_025993.1&jcf7180002757890 plus
7- 0:	XP_010924639.1	evm.model.jcf7180002757890.11	2e-82
7- 1:	XP_010924512.1	evm.model.jcf7180002757890.21	0
7- 2:	XP_019701415.1	evm.model.jcf7180002757890.22	0
7- 3:	XP_010927197.2	evm.model.jcf7180002757890.23	4e-22
7- 4:	XP_010924332.1	evm.model.jcf7180002757890.27	0
7- 5:	XP_010924322.1	evm.model.jcf7180002757890.28	3e-158
7- 6:	XP_010924290.1	evm.model.jcf7180002757890.29	3e-65
7- 7:	XP_010924253.1	evm.model.jcf7180002757890.34	2e-64
## Alignment 8: score=321.0 e_value=1.5e-13 N=7 NC_025993.1&jcf7180002757890 plus
8- 0:	XP_010924001.1	evm.model.jcf7180002757890.36	0
8- 1:	XP_010923907.1	evm.model.jcf7180002757890.39	5e-98
8- 2:	XP_010923876.1	evm.model.jcf7180002757890.40	0
8- 3:	XP_010923865.1	evm.model.jcf7180002757890.42	1e-101
8- 4:	XP_010923851.2	evm.model.jcf7180002757890.44	0
8- 5:	XP_010923697.1	evm.model.jcf7180002757890.91	1e-58
8- 6:	XP_010923559.1	evm.model.jcf7180002757890.108	0
## Alignment 9: score=298.0 e_value=2.3e-12 N=7 NC_025993.1&jcf7180002757893 plus
9- 0:	XP_010935952.1	evm.model.jcf7180002757893.64	4e-19
9- 1:	XP_010935758.1	evm.model.jcf7180002757893.73	4e-90
9- 2:	XP_010935646.1	evm.model.jcf7180002757893.89	2e-97
9- 3:	XP_019706850.1	evm.model.jcf7180002757893.100	6e-60
9- 4:	XP_010938447.1	evm.model.jcf7180002757893.103	1e-41
9- 5:	XP_010938435.1	evm.model.jcf7180002757893.105	0
9- 6:	XP_010938289.1	evm.model.jcf7180002757893.110	0
## Alignment 10: score=688.0 e_value=9e-39 N=15 NC_025993.1&jcf7180002757899 plus
10- 0:	XP_019709796.1	evm.model.jcf7180002757899.20	0
10- 1:	XP_010915495.1	evm.model.jcf7180002757899.21	3e-74
10- 2:	XP_010915232.1	evm.model.jcf7180002757899.24	3e-82
10- 3:	XP_010915190.1	evm.model.jcf7180002757899.26	4e-164
10- 4:	XP_010915080.1	evm.model.jcf7180002757899.28	4e-69
10- 5:	XP_010915098.1	evm.model.jcf7180002757899.29	1e-117
10- 6:	XP_010917259.1	evm.model.jcf7180002757899.31	1e-146
10- 7:	XP_010914972.1	evm.model.jcf7180002757899.32	1e-79
10- 8:	XP_010914944.1	evm.model.jcf7180002757899.33	2e-122
10- 9:	XP_010914932.1	evm.model.jcf7180002757899.34	0
10- 10:	XP_010914859.1	evm.model.jcf7180002757899.36	6e-57
10- 11:	XP_010914845.1	evm.model.jcf7180002757899.37	2e-114
10- 12:	XP_010914824.1	evm.model.jcf7180002757899.38	0
10- 13:	XP_010918640.1	evm.model.jcf7180002757899.49	5e-79
10- 14:	XP_010918620.1	evm.model.jcf7180002757899.50	1e-30
## Alignment 11: score=587.0 e_value=4.3e-35 N=13 NC_025993.1&jcf7180002757899 plus
11- 0:	XP_010918014.1	evm.model.jcf7180002757899.57	5e-62
11- 1:	XP_010917916.1	evm.model.jcf7180002757899.63	7e-69
11- 2:	XP_010917873.1	evm.model.jcf7180002757899.65	3e-70
11- 3:	XP_010917851.1	evm.model.jcf7180002757899.67	0.003
11- 4:	XP_010917830.1	evm.model.jcf7180002757899.71	5e-85
11- 5:	XP_010917794.1	evm.model.jcf7180002757899.72	0
11- 6:	XP_010917741.1	evm.model.jcf7180002757899.74	7e-49
11- 7:	XP_010917617.1	evm.model.jcf7180002757899.77	5e-35
11- 8:	XP_010917611.1	evm.model.jcf7180002757899.79	0
11- 9:	XP_010920705.1	evm.model.jcf7180002757899.81	4e-48
11- 10:	XP_010920688.1	evm.model.jcf7180002757899.82	1e-170
11- 11:	XP_010920620.1	evm.model.jcf7180002757899.84	3e-21
11- 12:	XP_010920608.2	evm.model.jcf7180002757899.85	2e-98
## Alignment 12: score=271.0 e_value=2.5e-08 N=6 NC_025993.1&jcf7180002757944 plus
12- 0:	XP_019704361.1	evm.model.jcf7180002757944.3	0
12- 1:	XP_010941311.1	evm.model.jcf7180002757944.6	0
12- 2:	XP_010941336.1	evm.model.jcf7180002757944.14	0
12- 3:	XP_010941577.1	evm.model.jcf7180002757944.24	0
12- 4:	XP_010941596.1	evm.model.jcf7180002757944.26	4e-157
12- 5:	XP_010941650.1	evm.model.jcf7180002757944.39	4e-176
## Alignment 13: score=506.0 e_value=5e-26 N=11 NC_025993.1&jcf7180002757985 minus
13- 0:	XP_010918871.1	evm.model.jcf7180002757985.57	4e-95
13- 1:	XP_010918858.1	evm.model.jcf7180002757985.56	2e-64
13- 2:	XP_010918848.1	evm.model.jcf7180002757985.54	1e-62
13- 3:	XP_010926761.1	evm.model.jcf7180002757985.38	4e-92
13- 4:	XP_010926715.1	evm.model.jcf7180002757985.37	1e-71
13- 5:	XP_010927442.1	evm.model.jcf7180002757985.36	0
13- 6:	XP_010926697.1	evm.model.jcf7180002757985.34	1e-35
13- 7:	XP_010926676.1	evm.model.jcf7180002757985.32	0
13- 8:	XP_010926663.1	evm.model.jcf7180002757985.30	9e-34
13- 9:	XP_010926643.1	evm.model.jcf7180002757985.26	0
13- 10:	XP_010926512.1	evm.model.jcf7180002757985.23	8e-39
## Alignment 14: score=342.0 e_value=1.8e-11 N=7 NC_025993.1&jcf7180002757985 minus
14- 0:	XP_010913556.1	evm.model.jcf7180002757985.20	0
14- 1:	XP_010913521.1	evm.model.jcf7180002757985.15	9e-37
14- 2:	XP_010913493.1	evm.model.jcf7180002757985.14	0
14- 3:	XP_010913480.1	evm.model.jcf7180002757985.13	2e-152
14- 4:	XP_010913457.1	evm.model.jcf7180002757985.9	0
14- 5:	XP_010913445.1	evm.model.jcf7180002757985.8	6e-34
14- 6:	XP_010913356.1	evm.model.jcf7180002757985.1	0
## Alignment 15: score=808.0 e_value=2.1e-42 N=17 NC_025993.1&jcf7180002758040 plus
15- 0:	XP_010919921.1	evm.model.jcf7180002758040.1	6e-65
15- 1:	XP_010919906.1	evm.model.jcf7180002758040.2	3e-82
15- 2:	XP_010919848.1	evm.model.jcf7180002758040.7	9e-129
15- 3:	XP_019703770.1	evm.model.jcf7180002758040.10	0
15- 4:	XP_010919817.1	evm.model.jcf7180002758040.11	1e-160
15- 5:	XP_010919805.1	evm.model.jcf7180002758040.12	7e-130
15- 6:	XP_010919783.1	evm.model.jcf7180002758040.13	0
15- 7:	XP_010919729.1	evm.model.jcf7180002758040.21	8e-121
15- 8:	XP_019705962.1	evm.model.jcf7180002758040.23	1e-82
15- 9:	XP_010919685.1	evm.model.jcf7180002758040.26	1e-34
15- 10:	XP_010919673.1	evm.model.jcf7180002758040.28	0
15- 11:	XP_010919652.1	evm.model.jcf7180002758040.30	2e-169
15- 12:	XP_010919602.1	evm.model.jcf7180002758040.31	8e-41
15- 13:	XP_010919583.1	evm.model.jcf7180002758040.32	0
15- 14:	XP_010919535.1	evm.model.jcf7180002758040.34	0
15- 15:	XP_010919404.1	evm.model.jcf7180002758040.37	7e-115
15- 16:	XP_010919381.1	evm.model.jcf7180002758040.38	0
## Alignment 16: score=289.0 e_value=1.8e-08 N=6 NC_025993.1&jcf7180002758041 minus
16- 0:	XP_010929843.1	evm.model.jcf7180002758041.17	4e-40
16- 1:	XP_019707813.1	evm.model.jcf7180002758041.15	4e-25
16- 2:	XP_010929797.1	evm.model.jcf7180002758041.13	0
16- 3:	XP_019709529.1	evm.model.jcf7180002758041.8	4e-144
16- 4:	XP_010929682.2	evm.model.jcf7180002758041.3	4e-48
16- 5:	XP_010929650.2	evm.model.jcf7180002758041.1	0
## Alignment 17: score=368.0 e_value=2.1e-15 N=8 NC_025993.1&jcf7180002758268 plus
17- 0:	XP_019709246.1	evm.model.jcf7180002758268.5	1e-17
17- 1:	XP_019703691.1	evm.model.jcf7180002758268.12	4e-102
17- 2:	XP_019706887.1	evm.model.jcf7180002758268.15	4e-178
17- 3:	XP_010938763.1	evm.model.jcf7180002758268.17	9e-146
17- 4:	XP_010938751.1	evm.model.jcf7180002758268.18	5e-107
17- 5:	XP_010939476.1	evm.model.jcf7180002758268.22	2e-91
17- 6:	XP_010939642.1	evm.model.jcf7180002758268.38	0
17- 7:	XP_010939679.1	evm.model.jcf7180002758268.43	4e-83
## Alignment 18: score=320.0 e_value=2.2e-11 N=7 NC_025993.1&jcf7180002759568 plus
18- 0:	XP_010936894.1	evm.model.jcf7180002759568.42	0
18- 1:	XP_010936880.1	evm.model.jcf7180002759568.43	3e-56
18- 2:	XP_010936846.1	evm.model.jcf7180002759568.45	0
18- 3:	XP_010936823.1	evm.model.jcf7180002759568.46	3e-53
18- 4:	XP_010936784.1	evm.model.jcf7180002759568.48	2e-10
18- 5:	XP_010936655.1	evm.model.jcf7180002759568.50	0
18- 6:	XP_010936594.1	evm.model.jcf7180002759568.52	5e-100
## Alignment 19: score=968.0 e_value=1.3e-61 N=21 NC_025993.1&jcf7180002759575 minus
19- 0:	XP_010943505.1	evm.model.jcf7180002759575.71	8e-104
19- 1:	XP_010943499.1	evm.model.jcf7180002759575.69	7e-100
19- 2:	XP_010943413.1	evm.model.jcf7180002759575.68	5e-63
19- 3:	XP_010943406.1	evm.model.jcf7180002759575.63	5e-89
19- 4:	XP_010943398.1	evm.model.jcf7180002759575.62	0
19- 5:	XP_010943379.1	evm.model.jcf7180002759575.60	9e-28
19- 6:	XP_010943349.1	evm.model.jcf7180002759575.50	0
19- 7:	XP_010943890.1	evm.model.jcf7180002759575.44	3e-33
19- 8:	XP_019704954.1	evm.model.jcf7180002759575.41	4e-33
19- 9:	XP_010943282.1	evm.model.jcf7180002759575.35	0
19- 10:	XP_010943272.1	evm.model.jcf7180002759575.34	0
19- 11:	XP_010943220.1	evm.model.jcf7180002759575.31	0
19- 12:	XP_010943199.2	evm.model.jcf7180002759575.28	1e-21
19- 13:	XP_010943167.1	evm.model.jcf7180002759575.27	7e-164
19- 14:	XP_010942989.1	evm.model.jcf7180002759575.22	1e-36
19- 15:	XP_010942977.1	evm.model.jcf7180002759575.21	3e-30
19- 16:	XP_010942945.1	evm.model.jcf7180002759575.19	0
19- 17:	XP_010942928.1	evm.model.jcf7180002759575.15	2e-70
19- 18:	XP_010942871.1	evm.model.jcf7180002759575.13	0
19- 19:	XP_010942826.1	evm.model.jcf7180002759575.10	0
19- 20:	XP_010942706.1	evm.model.jcf7180002759575.4	1e-38
## Alignment 20: score=1032.0 e_value=2e-69 N=23 NC_025993.1&jcf7180002759578 minus
20- 0:	XP_010942045.1	evm.model.jcf7180002759578.252	2e-38
20- 1:	XP_010942053.1	evm.model.jcf7180002759578.247	0
20- 2:	XP_010942059.1	evm.model.jcf7180002759578.245	3e-29
20- 3:	XP_010942070.1	evm.model.jcf7180002759578.236	2e-149
20- 4:	XP_010942089.1	evm.model.jcf7180002759578.230	2e-153
20- 5:	XP_010942307.1	evm.model.jcf7180002759578.228	2e-15
20- 6:	XP_010942330.1	evm.model.jcf7180002759578.225	1e-37
20- 7:	XP_010942340.1	evm.model.jcf7180002759578.223	9e-28
20- 8:	XP_010943602.1	evm.model.jcf7180002759578.214	0
20- 9:	XP_010904578.1	evm.model.jcf7180002759578.211	9e-60
20- 10:	XP_010904546.1	evm.model.jcf7180002759578.194	1e-55
20- 11:	XP_010943413.1	evm.model.jcf7180002759578.191	6e-96
20- 12:	XP_010943272.1	evm.model.jcf7180002759578.181	0
20- 13:	XP_010943209.2	evm.model.jcf7180002759578.173	0
20- 14:	XP_010943199.2	evm.model.jcf7180002759578.172	3e-28
20- 15:	XP_010943126.1	evm.model.jcf7180002759578.156	0
20- 16:	XP_010943025.1	evm.model.jcf7180002759578.154	7e-142
20- 17:	XP_010942913.1	evm.model.jcf7180002759578.150	3e-55
20- 18:	XP_010942893.1	evm.model.jcf7180002759578.139	5e-133
20- 19:	XP_010942826.1	evm.model.jcf7180002759578.126	3e-115
20- 20:	XP_010942771.1	evm.model.jcf7180002759578.117	0
20- 21:	XP_010943774.2	evm.model.jcf7180002759578.116	0
20- 22:	XP_010942754.1	evm.model.jcf7180002759578.103	8e-07
## Alignment 21: score=541.0 e_value=9.2e-29 N=12 NC_025993.1&jcf7180002759578 minus
21- 0:	NP_001290521.1	evm.model.jcf7180002759578.59	1e-33
21- 1:	NP_001306843.1	evm.model.jcf7180002759578.53	0
21- 2:	XP_010937936.1	evm.model.jcf7180002759578.52	0
21- 3:	XP_019704319.1	evm.model.jcf7180002759578.51	2e-118
21- 4:	XP_010937850.1	evm.model.jcf7180002759578.49	6e-111
21- 5:	XP_010937798.1	evm.model.jcf7180002759578.47	3e-114
21- 6:	XP_019705063.1	evm.model.jcf7180002759578.45	0
21- 7:	XP_010937691.1	evm.model.jcf7180002759578.41	2e-30
21- 8:	XP_010937601.1	evm.model.jcf7180002759578.38	1e-46
21- 9:	XP_010937582.1	evm.model.jcf7180002759578.37	1e-53
21- 10:	XP_010939426.1	evm.model.jcf7180002759578.15	3e-78
21- 11:	XP_019706864.1	evm.model.jcf7180002759578.9	3e-151
## Alignment 22: score=284.0 e_value=3.6e-08 N=6 NC_025993.1&jcf7180002759705 plus
22- 0:	XP_010914384.1	evm.model.jcf7180002759705.7	0
22- 1:	XP_010913629.1	evm.model.jcf7180002759705.9	4e-19
22- 2:	NP_001290520.1	evm.model.jcf7180002759705.10	5e-89
22- 3:	XP_010913034.1	evm.model.jcf7180002759705.13	4e-19
22- 4:	XP_010912919.1	evm.model.jcf7180002759705.14	2e-45
22- 5:	XP_019706090.1	evm.model.jcf7180002759705.15	4e-108
## Alignment 23: score=364.0 e_value=4.2e-18 N=9 NC_025993.1&jcf7180002766311 plus
23- 0:	XP_010934792.1	evm.model.jcf7180002766311.106	0
23- 1:	XP_010934804.1	evm.model.jcf7180002766311.107	2e-07
23- 2:	XP_010934842.1	evm.model.jcf7180002766311.108	7e-34
23- 3:	XP_010935059.1	evm.model.jcf7180002766311.113	0
23- 4:	XP_010937254.1	evm.model.jcf7180002766311.115	4e-137
23- 5:	XP_010937215.1	evm.model.jcf7180002766311.117	2e-112
23- 6:	XP_010937096.1	evm.model.jcf7180002766311.120	1e-80
23- 7:	XP_019702246.1	evm.model.jcf7180002766311.123	0
23- 8:	XP_010936868.1	evm.model.jcf7180002766311.126	2e-24
## Alignment 24: score=335.0 e_value=1.3e-11 N=7 NC_025993.1&jcf7180002766324 minus
24- 0:	XP_010904793.1	evm.model.jcf7180002766324.24	0
24- 1:	XP_010904805.1	evm.model.jcf7180002766324.23	2e-118
24- 2:	XP_010904818.1	evm.model.jcf7180002766324.21	3e-88
24- 3:	XP_010904882.1	evm.model.jcf7180002766324.18	0
24- 4:	XP_010904945.1	evm.model.jcf7180002766324.13	0
24- 5:	XP_010904959.1	evm.model.jcf7180002766324.10	6e-44
24- 6:	XP_010905728.2	evm.model.jcf7180002766324.4	7e-39
## Alignment 25: score=484.0 e_value=1.2e-25 N=11 NC_025993.1&jcf7180002766327 plus
25- 0:	XP_010943337.1	evm.model.jcf7180002766327.7	2e-49
25- 1:	XP_010943325.1	evm.model.jcf7180002766327.10	8e-32
25- 2:	XP_010943288.1	evm.model.jcf7180002766327.20	2
25- 3:	XP_010943272.1	evm.model.jcf7180002766327.23	0
25- 4:	XP_010943209.2	evm.model.jcf7180002766327.32	0
25- 5:	XP_010943199.2	evm.model.jcf7180002766327.38	2e-57
25- 6:	XP_010943179.1	evm.model.jcf7180002766327.84	0
25- 7:	XP_010942913.1	evm.model.jcf7180002766327.91	5e-104
25- 8:	XP_010942885.1	evm.model.jcf7180002766327.103	1e-26
25- 9:	XP_010942771.1	evm.model.jcf7180002766327.107	4e-19
25- 10:	XP_010942736.1	evm.model.jcf7180002766327.115	2e-06
## Alignment 26: score=888.0 e_value=2.3e-52 N=19 NC_025993.1&jcf7180002766345 minus
26- 0:	XP_010936372.1	evm.model.jcf7180002766345.257	8e-96
26- 1:	XP_010936273.1	evm.model.jcf7180002766345.203	1e-34
26- 2:	XP_010936181.1	evm.model.jcf7180002766345.201	2e-93
26- 3:	XP_010936171.1	evm.model.jcf7180002766345.184	1e-14
26- 4:	XP_010936161.1	evm.model.jcf7180002766345.174	1e-91
26- 5:	XP_010936149.1	evm.model.jcf7180002766345.173	4e-110
26- 6:	XP_010936128.1	evm.model.jcf7180002766345.163	3e-75
26- 7:	XP_010936119.1	evm.model.jcf7180002766345.139	6e-116
26- 8:	XP_010936096.1	evm.model.jcf7180002766345.136	4e-114
26- 9:	XP_010936083.1	evm.model.jcf7180002766345.131	1e-47
26- 10:	XP_010936073.1	evm.model.jcf7180002766345.129	1e-24
26- 11:	XP_010936060.1	evm.model.jcf7180002766345.109	2e-25
26- 12:	XP_010936028.1	evm.model.jcf7180002766345.92	0
26- 13:	XP_010937407.1	evm.model.jcf7180002766345.85	5e-91
26- 14:	XP_010935963.1	evm.model.jcf7180002766345.73	4e-95
26- 15:	XP_010935952.1	evm.model.jcf7180002766345.65	0
26- 16:	XP_010935920.1	evm.model.jcf7180002766345.54	1e-152
26- 17:	XP_010935910.1	evm.model.jcf7180002766345.50	0
26- 18:	XP_010935899.1	evm.model.jcf7180002766345.34	0
## Alignment 27: score=355.0 e_value=6.8e-15 N=8 NC_025993.1&jcf7180002766358 minus
27- 0:	XP_010923235.1	evm.model.jcf7180002766358.276	0
27- 1:	XP_019705574.1	evm.model.jcf7180002766358.261	1e-129
27- 2:	XP_010923091.1	evm.model.jcf7180002766358.253	0
27- 3:	XP_010923038.1	evm.model.jcf7180002766358.245	0
27- 4:	XP_010922920.1	evm.model.jcf7180002766358.224	2e-89
27- 5:	XP_010922901.1	evm.model.jcf7180002766358.219	0
27- 6:	XP_010922883.1	evm.model.jcf7180002766358.212	8e-11
27- 7:	XP_010922872.1	evm.model.jcf7180002766358.208	2e-19
## Alignment 28: score=771.0 e_value=9.2e-46 N=17 NC_025993.1&jcf7180002766391 plus
28- 0:	XP_010917340.1	evm.model.jcf7180002766391.2	0
28- 1:	XP_010915873.1	evm.model.jcf7180002766391.3	0
28- 2:	XP_019706239.1	evm.model.jcf7180002766391.5	4e-48
28- 3:	XP_010915763.1	evm.model.jcf7180002766391.7	0
28- 4:	XP_010915683.1	evm.model.jcf7180002766391.9	1e-66
28- 5:	XP_019709796.1	evm.model.jcf7180002766391.11	4e-146
28- 6:	XP_019707877.1	evm.model.jcf7180002766391.12	4e-66
28- 7:	XP_019701321.1	evm.model.jcf7180002766391.13	9e-119
28- 8:	XP_010915424.2	evm.model.jcf7180002766391.15	0
28- 9:	XP_010915261.1	evm.model.jcf7180002766391.21	0
28- 10:	XP_010915232.1	evm.model.jcf7180002766391.24	2e-68
28- 11:	XP_010915212.1	evm.model.jcf7180002766391.26	2e-174
28- 12:	XP_010917300.2	evm.model.jcf7180002766391.28	0
28- 13:	XP_010915190.1	evm.model.jcf7180002766391.30	0
28- 14:	XP_010915025.1	evm.model.jcf7180002766391.67	3e-22
28- 15:	XP_010914972.1	evm.model.jcf7180002766391.69	4e-80
28- 16:	XP_010914874.1	evm.model.jcf7180002766391.70	0
## Alignment 29: score=650.0 e_value=2.2e-37 N=14 NC_025993.1&jcf7180002766391 plus
29- 0:	XP_010933839.1	evm.model.jcf7180002766391.80	6
29- 1:	XP_010936118.1	evm.model.jcf7180002766391.118	4e-41
29- 2:	XP_010936661.1	evm.model.jcf7180002766391.120	0
29- 3:	XP_010936776.1	evm.model.jcf7180002766391.124	0
29- 4:	XP_010937442.1	evm.model.jcf7180002766391.125	1e-29
29- 5:	XP_010937974.1	evm.model.jcf7180002766391.130	0
29- 6:	XP_010938218.1	evm.model.jcf7180002766391.135	7e-35
29- 7:	XP_010938315.1	evm.model.jcf7180002766391.137	0
29- 8:	XP_010938428.1	evm.model.jcf7180002766391.138	3e-21
29- 9:	XP_010938533.1	evm.model.jcf7180002766391.140	0
29- 10:	XP_010938743.1	evm.model.jcf7180002766391.141	9e-28
29- 11:	XP_010939030.1	evm.model.jcf7180002766391.144	8e-84
29- 12:	XP_010912956.1	evm.model.jcf7180002766391.145	2e-107
29- 13:	XP_010939579.1	evm.model.jcf7180002766391.146	0
## Alignment 30: score=278.0 e_value=1.3e-08 N=6 NC_025993.1&jcf7180002766391 plus
30- 0:	XP_010911857.1	evm.model.jcf7180002766391.38	2e-29
30- 1:	XP_010911882.1	evm.model.jcf7180002766391.39	0
30- 2:	XP_010911901.1	evm.model.jcf7180002766391.41	8e-60
30- 3:	XP_010911931.1	evm.model.jcf7180002766391.42	2e-84
30- 4:	XP_010912000.1	evm.model.jcf7180002766391.44	0
30- 5:	XP_010912111.1	evm.model.jcf7180002766391.48	2e-111
## Alignment 31: score=1297.0 e_value=6.8e-93 N=29 NC_025993.1&jcf7180002766391 minus
31- 0:	XP_010913433.1	evm.model.jcf7180002766391.235	0
31- 1:	NP_001290520.1	evm.model.jcf7180002766391.233	1e-108
31- 2:	XP_010912395.1	evm.model.jcf7180002766391.229	1e-28
31- 3:	XP_010911999.1	evm.model.jcf7180002766391.220	7e-125
31- 4:	XP_019703644.1	evm.model.jcf7180002766391.219	0
31- 5:	XP_010933331.1	evm.model.jcf7180002766391.216	4e-157
31- 6:	XP_019705907.1	evm.model.jcf7180002766391.215	0
31- 7:	XP_010914635.1	evm.model.jcf7180002766391.213	3e-85
31- 8:	XP_010911328.1	evm.model.jcf7180002766391.211	1e-45
31- 9:	XP_019702744.1	evm.model.jcf7180002766391.207	0
31- 10:	XP_010912802.1	evm.model.jcf7180002766391.206	1e-55
31- 11:	NP_001291356.1	evm.model.jcf7180002766391.196	2e-16
31- 12:	XP_010928202.1	evm.model.jcf7180002766391.190	2e-74
31- 13:	XP_010928527.1	evm.model.jcf7180002766391.187	0
31- 14:	XP_019704696.1	evm.model.jcf7180002766391.186	0
31- 15:	XP_010929367.1	evm.model.jcf7180002766391.182	1e-111
31- 16:	XP_019709308.1	evm.model.jcf7180002766391.177	1e-60
31- 17:	XP_019707745.1	evm.model.jcf7180002766391.175	3e-80
31- 18:	XP_019708085.1	evm.model.jcf7180002766391.174	3e-38
31- 19:	XP_010931042.1	evm.model.jcf7180002766391.173	0
31- 20:	XP_010931221.1	evm.model.jcf7180002766391.172	0
31- 21:	XP_019709102.1	evm.model.jcf7180002766391.169	0
31- 22:	XP_010933839.1	evm.model.jcf7180002766391.163	6e-44
31- 23:	XP_010912920.1	evm.model.jcf7180002766391.159	3e-139
31- 24:	XP_010934139.1	evm.model.jcf7180002766391.157	2e-82
31- 25:	XP_010934233.1	evm.model.jcf7180002766391.156	1e-113
31- 26:	XP_010934629.2	evm.model.jcf7180002766391.155	1e-75
31- 27:	XP_010934735.1	evm.model.jcf7180002766391.154	0
31- 28:	XP_010936776.1	evm.model.jcf7180002766391.124	0
## Alignment 32: score=798.0 e_value=1.5e-46 N=17 NC_025993.1&jcf7180002766391 minus
32- 0:	XP_010906842.1	evm.model.jcf7180002766391.104	0
32- 1:	XP_010907204.1	evm.model.jcf7180002766391.101	2e-178
32- 2:	XP_010908684.1	evm.model.jcf7180002766391.96	0
32- 3:	XP_010908786.1	evm.model.jcf7180002766391.95	0
32- 4:	XP_010909078.1	evm.model.jcf7180002766391.94	5e-44
32- 5:	XP_010909465.1	evm.model.jcf7180002766391.93	4e-16
32- 6:	XP_010909842.1	evm.model.jcf7180002766391.88	0
32- 7:	XP_010910098.1	evm.model.jcf7180002766391.87	9e-28
32- 8:	XP_010910190.1	evm.model.jcf7180002766391.84	2e-177
32- 9:	XP_019707219.1	evm.model.jcf7180002766391.83	1e-68
32- 10:	XP_010910484.1	evm.model.jcf7180002766391.82	2e-168
32- 11:	XP_010910567.1	evm.model.jcf7180002766391.81	2e-32
32- 12:	XP_010910652.1	evm.model.jcf7180002766391.80	2e-93
32- 13:	XP_010910835.1	evm.model.jcf7180002766391.78	2e-134
32- 14:	XP_010911246.1	evm.model.jcf7180002766391.73	0
32- 15:	XP_010911882.1	evm.model.jcf7180002766391.66	6
32- 16:	XP_010911931.1	evm.model.jcf7180002766391.42	2e-84
## Alignment 33: score=327.0 e_value=3.6e-14 N=8 NC_025993.1&jcf7180002766391 minus
33- 0:	XP_010939579.1	evm.model.jcf7180002766391.146	0
33- 1:	XP_010941775.1	evm.model.jcf7180002766391.117	4e-114
33- 2:	XP_010942423.1	evm.model.jcf7180002766391.115	4e-96
33- 3:	XP_010942763.1	evm.model.jcf7180002766391.114	0
33- 4:	XP_010912991.1	evm.model.jcf7180002766391.110	0
33- 5:	XP_010904706.1	evm.model.jcf7180002766391.107	0
33- 6:	XP_010906463.1	evm.model.jcf7180002766391.99	0.002
33- 7:	XP_010906842.1	evm.model.jcf7180002766391.86	0
## Alignment 34: score=263.0 e_value=1.6e-10 N=6 NC_025993.1&jcf7180002766391 minus
34- 0:	XP_010914874.1	evm.model.jcf7180002766391.70	0
34- 1:	XP_019704706.1	evm.model.jcf7180002766391.64	0.1
34- 2:	XP_010918538.1	evm.model.jcf7180002766391.56	8e-111
34- 3:	XP_010918519.1	evm.model.jcf7180002766391.54	5e-135
34- 4:	XP_010918496.1	evm.model.jcf7180002766391.53	1e-158
34- 5:	XP_010918460.1	evm.model.jcf7180002766391.52	3e-117
## Alignment 35: score=506.0 e_value=1.3e-22 N=11 NC_025993.1&jcf7180002766393 plus
35- 0:	XP_010936393.1	evm.model.jcf7180002766393.232	3e-74
35- 1:	XP_010936361.1	evm.model.jcf7180002766393.242	3e-142
35- 2:	XP_019708802.1	evm.model.jcf7180002766393.250	4e-144
35- 3:	XP_010936306.1	evm.model.jcf7180002766393.252	1e-89
35- 4:	XP_010936273.1	evm.model.jcf7180002766393.253	0
35- 5:	XP_010936246.1	evm.model.jcf7180002766393.254	9e-155
35- 6:	XP_010936233.1	evm.model.jcf7180002766393.258	1e-55
35- 7:	XP_010936161.1	evm.model.jcf7180002766393.261	2e-67
35- 8:	XP_010936073.1	evm.model.jcf7180002766393.268	7e-58
35- 9:	XP_010937407.1	evm.model.jcf7180002766393.275	1e-101
35- 10:	XP_010935952.1	evm.model.jcf7180002766393.278	2e-42
## Alignment 36: score=460.0 e_value=4.3e-20 N=10 NC_025993.1&jcf7180002766429 plus
36- 0:	XP_010906523.1	evm.model.jcf7180002766429.12	0
36- 1:	XP_010906604.1	evm.model.jcf7180002766429.16	2e-76
36- 2:	XP_010906630.1	evm.model.jcf7180002766429.20	0
36- 3:	XP_010906679.1	evm.model.jcf7180002766429.22	2e-125
36- 4:	XP_010906689.1	evm.model.jcf7180002766429.23	3e-13
36- 5:	XP_019705747.1	evm.model.jcf7180002766429.26	1e-87
36- 6:	XP_010906744.1	evm.model.jcf7180002766429.27	6e-16
36- 7:	XP_010906788.1	evm.model.jcf7180002766429.31	4e-21
36- 8:	XP_010906857.1	evm.model.jcf7180002766429.37	9e-119
36- 9:	XP_010906878.1	evm.model.jcf7180002766429.41	7e-31
## Alignment 37: score=262.0 e_value=1.3e-07 N=6 NC_025993.1&jcf7180002766457 plus
37- 0:	XP_010919805.1	evm.model.jcf7180002766457.3	2e-62
37- 1:	XP_010919729.1	evm.model.jcf7180002766457.9	3e-30
37- 2:	XP_010919685.1	evm.model.jcf7180002766457.16	7e-51
37- 3:	XP_010919673.1	evm.model.jcf7180002766457.21	3e-25
37- 4:	XP_010919535.1	evm.model.jcf7180002766457.28	0
37- 5:	XP_010919434.1	evm.model.jcf7180002766457.31	4e-30
## Alignment 38: score=649.0 e_value=1.8e-36 N=14 NC_025993.1&jcf7180002766472 plus
38- 0:	XP_010941672.1	evm.model.jcf7180002766472.63	2e-82
38- 1:	XP_019705492.1	evm.model.jcf7180002766472.64	3e-165
38- 2:	XP_010941694.1	evm.model.jcf7180002766472.65	0
38- 3:	XP_010941865.1	evm.model.jcf7180002766472.76	0
38- 4:	XP_010942045.1	evm.model.jcf7180002766472.83	4e-35
38- 5:	XP_010942070.1	evm.model.jcf7180002766472.84	1e-134
38- 6:	XP_010942089.1	evm.model.jcf7180002766472.89	5e-141
38- 7:	XP_019708000.1	evm.model.jcf7180002766472.95	5e-24
38- 8:	XP_010943614.1	evm.model.jcf7180002766472.97	9e-138
38- 9:	XP_010943590.1	evm.model.jcf7180002766472.104	2e-81
38- 10:	XP_010943579.1	evm.model.jcf7180002766472.105	0
38- 11:	XP_010943566.1	evm.model.jcf7180002766472.110	5e-96
38- 12:	XP_010943546.1	evm.model.jcf7180002766472.112	0
38- 13:	XP_010943534.1	evm.model.jcf7180002766472.114	2e-53
## Alignment 39: score=275.0 e_value=1.1e-08 N=6 NC_025993.1&jcf7180002766472 minus
39- 0:	XP_010941706.1	evm.model.jcf7180002766472.82	0
39- 1:	XP_010941804.1	evm.model.jcf7180002766472.77	3e-102
39- 2:	XP_010941865.1	evm.model.jcf7180002766472.76	0
39- 3:	XP_010941962.1	evm.model.jcf7180002766472.73	2e-180
39- 4:	XP_019708914.1	evm.model.jcf7180002766472.72	2e-86
39- 5:	XP_010941984.1	evm.model.jcf7180002766472.70	1e-106
## Alignment 40: score=712.0 e_value=1.9e-41 N=16 NC_025993.1&jcf7180002766494 plus
40- 0:	XP_010926002.1	evm.model.jcf7180002766494.73	1e-52
40- 1:	XP_010927384.1	evm.model.jcf7180002766494.74	3e-57
40- 2:	XP_010925976.1	evm.model.jcf7180002766494.77	6e-65
40- 3:	XP_019707761.1	evm.model.jcf7180002766494.83	5e-36
40- 4:	XP_010925945.1	evm.model.jcf7180002766494.85	5e-80
40- 5:	XP_010925884.1	evm.model.jcf7180002766494.86	0
40- 6:	XP_010925730.1	evm.model.jcf7180002766494.100	5e-167
40- 7:	XP_010925654.1	evm.model.jcf7180002766494.105	7e-46
40- 8:	XP_010925525.1	evm.model.jcf7180002766494.108	0
40- 9:	XP_010925444.1	evm.model.jcf7180002766494.121	7e-35
40- 10:	XP_010925356.1	evm.model.jcf7180002766494.125	1e-11
40- 11:	XP_010927265.1	evm.model.jcf7180002766494.130	4e-131
40- 12:	XP_010925337.1	evm.model.jcf7180002766494.131	8e-29
40- 13:	XP_010925256.1	evm.model.jcf7180002766494.138	1e-25
40- 14:	XP_010925133.1	evm.model.jcf7180002766494.145	2e-75
40- 15:	XP_010925079.1	evm.model.jcf7180002766494.148	0
## Alignment 41: score=321.0 e_value=4.5e-13 N=7 NC_025993.1&jcf7180002766494 minus
41- 0:	XP_019705574.1	evm.model.jcf7180002766494.64	2e-127
41- 1:	XP_010923091.1	evm.model.jcf7180002766494.60	0
41- 2:	XP_010922976.1	evm.model.jcf7180002766494.30	0
41- 3:	XP_010922920.1	evm.model.jcf7180002766494.27	3e-113
41- 4:	XP_010922901.1	evm.model.jcf7180002766494.24	0
41- 5:	XP_010922883.1	evm.model.jcf7180002766494.21	2e-09
41- 6:	XP_010922872.1	evm.model.jcf7180002766494.19	3e-18
## Alignment 42: score=524.0 e_value=3.2e-24 N=11 NC_025993.1&jcf7180002766509 plus
42- 0:	XP_019704319.1	evm.model.jcf7180002766509.135	0
42- 1:	XP_010937862.2	evm.model.jcf7180002766509.136	1e-102
42- 2:	XP_010937787.1	evm.model.jcf7180002766509.137	7e-43
42- 3:	XP_010937798.1	evm.model.jcf7180002766509.138	7e-47
42- 4:	XP_019705063.1	evm.model.jcf7180002766509.141	0
42- 5:	XP_010937747.1	evm.model.jcf7180002766509.143	0
42- 6:	XP_010937645.1	evm.model.jcf7180002766509.144	2e-127
42- 7:	XP_010937633.1	evm.model.jcf7180002766509.146	0
42- 8:	XP_010937601.1	evm.model.jcf7180002766509.148	2e-139
42- 9:	XP_010937582.1	evm.model.jcf7180002766509.150	7e-83
42- 10:	XP_010937564.1	evm.model.jcf7180002766509.151	9e-23
## Alignment 43: score=354.0 e_value=2.2e-15 N=8 NC_025993.1&jcf7180002766521 plus
43- 0:	XP_010940780.1	evm.model.jcf7180002766521.74	8e-84
43- 1:	XP_019706922.1	evm.model.jcf7180002766521.75	0
43- 2:	XP_010942171.1	evm.model.jcf7180002766521.90	2e-18
43- 3:	XP_010942210.1	evm.model.jcf7180002766521.106	3e-42
43- 4:	XP_010941051.1	evm.model.jcf7180002766521.119	3e-45
43- 5:	NP_001306847.1	evm.model.jcf7180002766521.122	2e-105
43- 6:	XP_010941150.1	evm.model.jcf7180002766521.124	0
43- 7:	XP_010941162.1	evm.model.jcf7180002766521.130	5e-12
## Alignment 44: score=342.0 e_value=1.2e-12 N=8 NC_025993.1&jcf7180002766521 minus
44- 0:	XP_010906523.1	evm.model.jcf7180002766521.32	0
44- 1:	XP_010906604.1	evm.model.jcf7180002766521.27	1e-31
44- 2:	XP_010906630.1	evm.model.jcf7180002766521.24	0
44- 3:	XP_010906679.1	evm.model.jcf7180002766521.22	0
44- 4:	XP_019705747.1	evm.model.jcf7180002766521.20	1e-36
44- 5:	XP_010906824.1	evm.model.jcf7180002766521.11	2e-131
44- 6:	XP_010906857.1	evm.model.jcf7180002766521.9	5e-130
44- 7:	XP_010907007.1	evm.model.jcf7180002766521.6	0
## Alignment 45: score=351.0 e_value=4.8e-16 N=8 NC_025993.1&jcf7180002766540 plus
45- 0:	XP_010935739.1	evm.model.jcf7180002766540.10	8e-125
45- 1:	XP_010935726.1	evm.model.jcf7180002766540.13	2e-111
45- 2:	XP_019706850.1	evm.model.jcf7180002766540.33	3e-59
45- 3:	XP_010938447.1	evm.model.jcf7180002766540.35	2e-53
45- 4:	XP_010938289.1	evm.model.jcf7180002766540.44	0
45- 5:	XP_010938227.1	evm.model.jcf7180002766540.47	0
45- 6:	XP_010938186.1	evm.model.jcf7180002766540.53	0
45- 7:	XP_010938128.1	evm.model.jcf7180002766540.55	3e-36
## Alignment 46: score=366.0 e_value=3.8e-15 N=8 NC_025993.1&jcf7180002766545 plus
46- 0:	XP_010917158.1	evm.model.jcf7180002766545.37	0
46- 1:	XP_010917092.1	evm.model.jcf7180002766545.41	9e-36
46- 2:	XP_010916988.1	evm.model.jcf7180002766545.44	2e-111
46- 3:	XP_010916969.1	evm.model.jcf7180002766545.45	2e-123
46- 4:	XP_010917440.2	evm.model.jcf7180002766545.53	2e-64
46- 5:	XP_010916813.1	evm.model.jcf7180002766545.70	0
46- 6:	XP_010916803.1	evm.model.jcf7180002766545.73	3e-26
46- 7:	XP_010916787.1	evm.model.jcf7180002766545.76	1e-23
## Alignment 47: score=320.0 e_value=2.1e-14 N=7 NC_025993.1&jcf7180002766545 minus
47- 0:	XP_010914410.1	evm.model.jcf7180002766545.32	0
47- 1:	XP_010914183.1	evm.model.jcf7180002766545.14	2e-106
47- 2:	XP_010914170.1	evm.model.jcf7180002766545.9	7e-67
47- 3:	XP_010914151.1	evm.model.jcf7180002766545.7	2e-104
47- 4:	XP_010914141.1	evm.model.jcf7180002766545.5	3e-27
47- 5:	XP_010914621.1	evm.model.jcf7180002766545.4	1e-141
47- 6:	XP_010914122.1	evm.model.jcf7180002766545.1	2e-156
## Alignment 48: score=279.0 e_value=3.3e-08 N=6 NC_025993.1&jcf7180002766546 plus
48- 0:	XP_010930933.2	evm.model.jcf7180002766546.3	0
48- 1:	XP_010930815.1	evm.model.jcf7180002766546.6	0
48- 2:	XP_010931925.1	evm.model.jcf7180002766546.7	3e-27
48- 3:	XP_010930697.1	evm.model.jcf7180002766546.9	6e-49
48- 4:	XP_010930685.1	evm.model.jcf7180002766546.12	6e-32
48- 5:	XP_010930664.1	evm.model.jcf7180002766546.17	0
## Alignment 49: score=342.0 e_value=4.7e-14 N=8 NC_025993.1&jcf7180002766558 plus
49- 0:	XP_010905655.1	evm.model.jcf7180002766558.46	0
49- 1:	XP_010904666.1	evm.model.jcf7180002766558.50	0
49- 2:	XP_010904793.1	evm.model.jcf7180002766558.62	2e-45
49- 3:	XP_010904805.1	evm.model.jcf7180002766558.66	3e-130
49- 4:	XP_010904945.1	evm.model.jcf7180002766558.74	3e-147
49- 5:	XP_010905064.1	evm.model.jcf7180002766558.83	0
49- 6:	XP_010905140.1	evm.model.jcf7180002766558.84	4e-11
49- 7:	XP_010905183.1	evm.model.jcf7180002766558.87	1e-73
## Alignment 50: score=272.0 e_value=1.5e-10 N=6 NC_025993.1&jcf7180002766563 minus
50- 0:	XP_010935791.1	evm.model.jcf7180002766563.159	0
50- 1:	XP_010937360.1	evm.model.jcf7180002766563.128	1e-57
50- 2:	XP_010935694.1	evm.model.jcf7180002766563.127	2e-74
50- 3:	XP_010935626.1	evm.model.jcf7180002766563.123	0
50- 4:	XP_010938481.1	evm.model.jcf7180002766563.109	3e-157
50- 5:	XP_010938472.1	evm.model.jcf7180002766563.94	1e-93
## Alignment 51: score=947.0 e_value=5.8e-61 N=21 NC_025993.1&jcf7180002766573 plus
51- 0:	XP_010914410.1	evm.model.jcf7180002766573.61	0
51- 1:	XP_010914397.1	evm.model.jcf7180002766573.63	8e-171
51- 2:	XP_010914367.1	evm.model.jcf7180002766573.66	1e-53
51- 3:	XP_010914262.1	evm.model.jcf7180002766573.71	8e-49
51- 4:	XP_010914170.1	evm.model.jcf7180002766573.82	5e-70
51- 5:	XP_010914141.1	evm.model.jcf7180002766573.84	2e-32
51- 6:	XP_010914025.1	evm.model.jcf7180002766573.94	1e-122
51- 7:	XP_010913987.1	evm.model.jcf7180002766573.100	2e-123
51- 8:	XP_010913877.1	evm.model.jcf7180002766573.104	1e-121
51- 9:	XP_019708370.1	evm.model.jcf7180002766573.108	9e-45
51- 10:	XP_010913831.1	evm.model.jcf7180002766573.110	0
51- 11:	XP_010913717.1	evm.model.jcf7180002766573.121	1e-143
51- 12:	XP_010913688.1	evm.model.jcf7180002766573.131	0
51- 13:	XP_010913580.1	evm.model.jcf7180002766573.134	9e-76
51- 14:	XP_010913480.1	evm.model.jcf7180002766573.143	3e-111
51- 15:	XP_010913434.1	evm.model.jcf7180002766573.147	1e-118
51- 16:	XP_010913356.1	evm.model.jcf7180002766573.152	0
51- 17:	XP_010913271.1	evm.model.jcf7180002766573.157	2e-25
51- 18:	XP_010913180.1	evm.model.jcf7180002766573.161	6e-146
51- 19:	XP_019708615.1	evm.model.jcf7180002766573.164	3e-71
51- 20:	XP_010913162.2	evm.model.jcf7180002766573.165	3e-92
## Alignment 52: score=409.0 e_value=2.7e-18 N=9 NC_025993.1&jcf7180002766573 minus
52- 0:	XP_010917189.1	evm.model.jcf7180002766573.56	0
52- 1:	XP_010917158.1	evm.model.jcf7180002766573.54	0
52- 2:	XP_010917092.1	evm.model.jcf7180002766573.50	1e-36
52- 3:	XP_010916969.1	evm.model.jcf7180002766573.48	4e-37
52- 4:	XP_010916932.1	evm.model.jcf7180002766573.46	1e-69
52- 5:	XP_010916813.1	evm.model.jcf7180002766573.21	0
52- 6:	XP_010916803.1	evm.model.jcf7180002766573.18	4e-34
52- 7:	XP_010916787.1	evm.model.jcf7180002766573.14	8e-54
52- 8:	XP_010916758.1	evm.model.jcf7180002766573.3	1e-62
## Alignment 53: score=663.0 e_value=2e-35 N=14 NC_025993.1&jcf7180002766622 plus
53- 0:	XP_010934559.1	evm.model.jcf7180002766622.1	0
53- 1:	XP_019702372.1	evm.model.jcf7180002766622.5	2e-93
53- 2:	XP_010934630.1	evm.model.jcf7180002766622.8	5e-167
53- 3:	XP_010935505.1	evm.model.jcf7180002766622.9	0
53- 4:	XP_010934659.1	evm.model.jcf7180002766622.14	5e-99
53- 5:	XP_010934670.1	evm.model.jcf7180002766622.15	0
53- 6:	XP_019704532.1	evm.model.jcf7180002766622.17	6e-71
53- 7:	XP_010935517.1	evm.model.jcf7180002766622.19	3e-95
53- 8:	XP_010934754.1	evm.model.jcf7180002766622.21	4e-84
53- 9:	XP_010934792.1	evm.model.jcf7180002766622.22	0
53- 10:	XP_010934817.1	evm.model.jcf7180002766622.24	4e-66
53- 11:	XP_010934822.1	evm.model.jcf7180002766622.25	2e-134
53- 12:	XP_019710571.1	evm.model.jcf7180002766622.26	0
53- 13:	XP_019709780.1	evm.model.jcf7180002766622.33	0
## Alignment 54: score=722.0 e_value=6.6e-40 N=16 NC_025993.1&jcf7180002766650 plus
54- 0:	XP_019701712.1	evm.model.jcf7180002766650.28	2e-48
54- 1:	XP_010929557.1	evm.model.jcf7180002766650.31	0
54- 2:	XP_010929469.1	evm.model.jcf7180002766650.36	0
54- 3:	XP_010931640.1	evm.model.jcf7180002766650.40	1e-08
54- 4:	XP_010929395.1	evm.model.jcf7180002766650.50	0
54- 5:	XP_019710371.1	evm.model.jcf7180002766650.51	1e-141
54- 6:	XP_010929315.1	evm.model.jcf7180002766650.63	5e-44
54- 7:	XP_010929249.1	evm.model.jcf7180002766650.68	0
54- 8:	XP_010929073.1	evm.model.jcf7180002766650.74	3e-13
54- 9:	XP_010929045.1	evm.model.jcf7180002766650.75	7e-23
54- 10:	XP_010928933.1	evm.model.jcf7180002766650.81	4e-53
54- 11:	XP_010928868.1	evm.model.jcf7180002766650.85	2e-55
54- 12:	XP_010928834.1	evm.model.jcf7180002766650.87	0
54- 13:	XP_010928808.1	evm.model.jcf7180002766650.94	0
54- 14:	XP_010928795.1	evm.model.jcf7180002766650.96	7e-86
54- 15:	XP_010928757.1	evm.model.jcf7180002766650.99	0
## Alignment 55: score=1026.0 e_value=1.3e-65 N=22 NC_025993.1&jcf7180002766665 minus
55- 0:	XP_010925278.1	evm.model.jcf7180002766665.69	5e-139
55- 1:	XP_010925212.1	evm.model.jcf7180002766665.65	3
55- 2:	XP_010925114.1	evm.model.jcf7180002766665.59	0
55- 3:	XP_010927245.1	evm.model.jcf7180002766665.56	2e-108
55- 4:	XP_010925079.1	evm.model.jcf7180002766665.55	0
55- 5:	XP_010925035.1	evm.model.jcf7180002766665.53	6e-20
55- 6:	XP_010925025.1	evm.model.jcf7180002766665.52	4e-51
55- 7:	XP_010925014.1	evm.model.jcf7180002766665.49	2e-163
55- 8:	XP_010924974.1	evm.model.jcf7180002766665.48	1e-83
55- 9:	XP_010924953.1	evm.model.jcf7180002766665.47	5e-41
55- 10:	XP_010924825.1	evm.model.jcf7180002766665.39	7e-161
55- 11:	XP_010924780.1	evm.model.jcf7180002766665.38	0
55- 12:	XP_010924760.1	evm.model.jcf7180002766665.37	1e-33
55- 13:	XP_010924749.1	evm.model.jcf7180002766665.34	2e-48
55- 14:	XP_019704752.1	evm.model.jcf7180002766665.33	2e-39
55- 15:	XP_010924715.1	evm.model.jcf7180002766665.28	1e-23
55- 16:	XP_010924704.1	evm.model.jcf7180002766665.26	3e-156
55- 17:	XP_010924660.1	evm.model.jcf7180002766665.22	3e-64
55- 18:	XP_010924606.1	evm.model.jcf7180002766665.8	0
55- 19:	XP_010924512.1	evm.model.jcf7180002766665.7	4e-77
55- 20:	XP_010927197.2	evm.model.jcf7180002766665.4	3e-39
55- 21:	XP_010927186.1	evm.model.jcf7180002766665.1	5e-122
## Alignment 56: score=632.0 e_value=7.8e-34 N=14 NC_025993.1&jcf7180002766674 minus
56- 0:	XP_010916300.1	evm.model.jcf7180002766674.48	0
56- 1:	XP_010916124.1	evm.model.jcf7180002766674.45	7e-55
56- 2:	XP_010916099.1	evm.model.jcf7180002766674.41	2e-165
56- 3:	XP_010916009.1	evm.model.jcf7180002766674.38	0
56- 4:	XP_010915998.1	evm.model.jcf7180002766674.37	3e-82
56- 5:	XP_010915966.2	evm.model.jcf7180002766674.34	0
56- 6:	XP_010915914.2	evm.model.jcf7180002766674.33	0
56- 7:	XP_019704081.1	evm.model.jcf7180002766674.24	3e-88
56- 8:	XP_010915669.1	evm.model.jcf7180002766674.19	3e-151
56- 9:	XP_010915658.1	evm.model.jcf7180002766674.18	4e-40
56- 10:	XP_019701321.1	evm.model.jcf7180002766674.13	3e-158
56- 11:	XP_010915447.1	evm.model.jcf7180002766674.11	1e-43
56- 12:	XP_010915357.1	evm.model.jcf7180002766674.5	0
56- 13:	XP_010915345.1	evm.model.jcf7180002766674.1	6e-62
## Alignment 57: score=634.0 e_value=7.5e-35 N=14 NC_025993.1&jcf7180002766680 plus
57- 0:	XP_010906486.1	evm.model.jcf7180002766680.23	1e-40
57- 1:	XP_010906509.1	evm.model.jcf7180002766680.25	2e-28
57- 2:	XP_010906542.1	evm.model.jcf7180002766680.27	5e-86
57- 3:	XP_010906604.1	evm.model.jcf7180002766680.30	5e-146
57- 4:	XP_019710947.1	evm.model.jcf7180002766680.32	7e-168
57- 5:	XP_010906708.1	evm.model.jcf7180002766680.44	2e-95
57- 6:	XP_019701999.1	evm.model.jcf7180002766680.46	1e-72
57- 7:	XP_019705747.1	evm.model.jcf7180002766680.47	3e-35
57- 8:	XP_010906788.1	evm.model.jcf7180002766680.55	1e-109
57- 9:	XP_010906805.1	evm.model.jcf7180002766680.59	5e-74
57- 10:	XP_010906836.1	evm.model.jcf7180002766680.64	5e-28
57- 11:	XP_010906942.1	evm.model.jcf7180002766680.66	3e-72
57- 12:	XP_010906959.1	evm.model.jcf7180002766680.67	4e-148
57- 13:	XP_010907128.1	evm.model.jcf7180002766680.78	0
## Alignment 58: score=655.0 e_value=5.3e-42 N=15 NC_025993.1&jcf7180002766685 plus
58- 0:	XP_010918287.1	evm.model.jcf7180002766685.97	9e-102
58- 1:	XP_019706269.1	evm.model.jcf7180002766685.99	2e-112
58- 2:	XP_010917929.1	evm.model.jcf7180002766685.102	0
58- 3:	XP_010917894.1	evm.model.jcf7180002766685.103	2e-12
58- 4:	XP_010917873.1	evm.model.jcf7180002766685.104	1e-54
58- 5:	XP_010917839.1	evm.model.jcf7180002766685.108	1e-86
58- 6:	XP_010917830.1	evm.model.jcf7180002766685.109	8e-75
58- 7:	XP_010917794.1	evm.model.jcf7180002766685.110	3e-17
58- 8:	XP_010917678.1	evm.model.jcf7180002766685.113	0
58- 9:	XP_010917589.1	evm.model.jcf7180002766685.116	1e-98
58- 10:	XP_010917611.1	evm.model.jcf7180002766685.118	0
58- 11:	XP_010920705.1	evm.model.jcf7180002766685.120	3e-69
58- 12:	XP_010920688.1	evm.model.jcf7180002766685.121	8e-36
58- 13:	XP_010920633.1	evm.model.jcf7180002766685.122	2e-97
58- 14:	XP_010920608.2	evm.model.jcf7180002766685.124	6e-80
## Alignment 59: score=559.0 e_value=2.6e-26 N=12 NC_025993.1&jcf7180002766685 plus
59- 0:	XP_010926460.1	evm.model.jcf7180002766685.184	9e-16
59- 1:	XP_019706445.1	evm.model.jcf7180002766685.186	0
59- 2:	XP_010926397.1	evm.model.jcf7180002766685.187	2e-112
59- 3:	XP_010926244.1	evm.model.jcf7180002766685.189	0
59- 4:	XP_019701503.1	evm.model.jcf7180002766685.192	0
59- 5:	XP_010926118.1	evm.model.jcf7180002766685.193	0
59- 6:	XP_019706384.1	evm.model.jcf7180002766685.196	1e-37
59- 7:	XP_010926084.1	evm.model.jcf7180002766685.198	1e-141
59- 8:	XP_010926074.1	evm.model.jcf7180002766685.200	3e-13
59- 9:	XP_010926065.1	evm.model.jcf7180002766685.202	5e-175
59- 10:	XP_010926053.1	evm.model.jcf7180002766685.204	1e-41
59- 11:	XP_019705455.1	evm.model.jcf7180002766685.205	1e-51
## Alignment 60: score=439.0 e_value=1.5e-22 N=10 NC_025993.1&jcf7180002766685 plus
60- 0:	XP_010920176.1	evm.model.jcf7180002766685.92	0.6
60- 1:	XP_010920155.1	evm.model.jcf7180002766685.128	3e-54
60- 2:	XP_010920079.1	evm.model.jcf7180002766685.132	4e-28
60- 3:	XP_010919890.1	evm.model.jcf7180002766685.135	8e-97
60- 4:	XP_010919848.1	evm.model.jcf7180002766685.136	2e-151
60- 5:	XP_019703770.1	evm.model.jcf7180002766685.138	0
60- 6:	XP_010919729.1	evm.model.jcf7180002766685.142	1e-99
60- 7:	XP_010919719.1	evm.model.jcf7180002766685.144	2e-15
60- 8:	XP_019705962.1	evm.model.jcf7180002766685.147	3e-83
60- 9:	XP_010919602.1	evm.model.jcf7180002766685.153	4e-60
## Alignment 61: score=561.0 e_value=1.7e-34 N=13 NC_025993.1&jcf7180002766685 minus
61- 0:	XP_010913215.1	evm.model.jcf7180002766685.79	3e-16
61- 1:	XP_010917496.2	evm.model.jcf7180002766685.44	1e-32
61- 2:	XP_010917486.2	evm.model.jcf7180002766685.43	2e-23
61- 3:	XP_010916944.1	evm.model.jcf7180002766685.41	5e-103
61- 4:	XP_010916830.1	evm.model.jcf7180002766685.36	1e-73
61- 5:	XP_019708506.1	evm.model.jcf7180002766685.34	8e-17
61- 6:	XP_019705480.1	evm.model.jcf7180002766685.33	4e-35
61- 7:	XP_010916758.1	evm.model.jcf7180002766685.26	1e-148
61- 8:	XP_010917398.2	evm.model.jcf7180002766685.15	6e-46
61- 9:	XP_010916623.1	evm.model.jcf7180002766685.11	3e-42
61- 10:	XP_010916493.1	evm.model.jcf7180002766685.10	3e-99
61- 11:	XP_010916480.1	evm.model.jcf7180002766685.9	0
61- 12:	XP_010916343.1	evm.model.jcf7180002766685.6	9e-130
## Alignment 62: score=327.0 e_value=1.7e-11 N=7 NC_025993.1&jcf7180002766685 minus
62- 0:	XP_019708639.1	evm.model.jcf7180002766685.93	4e-28
62- 1:	XP_010912285.1	evm.model.jcf7180002766685.92	3e-20
62- 2:	XP_010912311.1	evm.model.jcf7180002766685.91	0
62- 3:	XP_010912398.1	evm.model.jcf7180002766685.90	1e-99
62- 4:	XP_010912420.1	evm.model.jcf7180002766685.89	4e-28
62- 5:	XP_019708288.1	evm.model.jcf7180002766685.88	8e-21
62- 6:	XP_010912456.1	evm.model.jcf7180002766685.84	0
## Alignment 63: score=372.0 e_value=1.3e-13 N=8 NC_025993.1&jcf7180002766686 plus
63- 0:	XP_010922312.2	evm.model.jcf7180002766686.6	1e-165
63- 1:	XP_010922266.2	evm.model.jcf7180002766686.14	0
63- 2:	XP_010927048.1	evm.model.jcf7180002766686.17	2e-116
63- 3:	XP_010922003.1	evm.model.jcf7180002766686.27	2e-31
63- 4:	XP_010921990.1	evm.model.jcf7180002766686.31	1e-73
63- 5:	XP_010921946.1	evm.model.jcf7180002766686.33	2e-63
63- 6:	XP_010921927.1	evm.model.jcf7180002766686.36	0
63- 7:	XP_010927032.1	evm.model.jcf7180002766686.37	7e-43
## Alignment 64: score=623.0 e_value=1.8e-32 N=14 NC_025993.1&jcf7180002766706 plus
64- 0:	XP_010941741.1	evm.model.jcf7180002766706.54	0
64- 1:	XP_010941939.1	evm.model.jcf7180002766706.55	2e-90
64- 2:	XP_010942045.1	evm.model.jcf7180002766706.56	4e-30
64- 3:	XP_010942307.1	evm.model.jcf7180002766706.59	3e-16
64- 4:	XP_010942340.1	evm.model.jcf7180002766706.61	9e-49
64- 5:	XP_010943602.1	evm.model.jcf7180002766706.63	0
64- 6:	XP_010943590.1	evm.model.jcf7180002766706.64	3e-90
64- 7:	XP_010943516.1	evm.model.jcf7180002766706.65	2e-47
64- 8:	XP_010943505.1	evm.model.jcf7180002766706.67	5e-122
64- 9:	XP_010943413.1	evm.model.jcf7180002766706.68	4e-82
64- 10:	XP_010943360.1	evm.model.jcf7180002766706.73	1e-78
64- 11:	XP_010943325.1	evm.model.jcf7180002766706.74	1e-15
64- 12:	XP_019704954.1	evm.model.jcf7180002766706.75	6e-34
64- 13:	XP_010943241.1	evm.model.jcf7180002766706.76	0
## Alignment 65: score=410.0 e_value=2.8e-18 N=9 NC_025993.1&jcf7180002766706 plus
65- 0:	XP_019703726.1	evm.model.jcf7180002766706.11	1e-26
65- 1:	XP_019703691.1	evm.model.jcf7180002766706.12	1e-171
65- 2:	XP_019706887.1	evm.model.jcf7180002766706.14	7e-148
65- 3:	XP_010938737.1	evm.model.jcf7180002766706.15	2e-60
65- 4:	XP_010939679.1	evm.model.jcf7180002766706.22	0
65- 5:	XP_019708667.1	evm.model.jcf7180002766706.32	2e-113
65- 6:	XP_010939754.1	evm.model.jcf7180002766706.33	0
65- 7:	XP_010939787.1	evm.model.jcf7180002766706.34	0
65- 8:	XP_010939967.1	evm.model.jcf7180002766706.36	0
## Alignment 66: score=1033.0 e_value=3.6e-64 N=23 NC_025993.1&jcf7180002766733 minus
66- 0:	XP_010918127.1	evm.model.jcf7180002766733.126	0
66- 1:	XP_010917577.1	evm.model.jcf7180002766733.120	2e-86
66- 2:	XP_010917101.1	evm.model.jcf7180002766733.111	6e-180
66- 3:	XP_010916867.1	evm.model.jcf7180002766733.106	0
66- 4:	XP_010916776.1	evm.model.jcf7180002766733.105	0
66- 5:	XP_010916538.1	evm.model.jcf7180002766733.94	0
66- 6:	XP_010916177.1	evm.model.jcf7180002766733.93	0
66- 7:	XP_010915657.1	evm.model.jcf7180002766733.89	4e-134
66- 8:	XP_010915137.1	evm.model.jcf7180002766733.86	3e-142
66- 9:	XP_010913629.1	evm.model.jcf7180002766733.80	1e-140
66- 10:	XP_010913433.1	evm.model.jcf7180002766733.79	8e-117
66- 11:	XP_010913034.1	evm.model.jcf7180002766733.71	0
66- 12:	XP_010912759.1	evm.model.jcf7180002766733.70	0
66- 13:	XP_010912205.1	evm.model.jcf7180002766733.60	2e-85
66- 14:	XP_010906300.1	evm.model.jcf7180002766733.56	0
66- 15:	XP_010939249.1	evm.model.jcf7180002766733.43	2e-56
66- 16:	XP_010933331.1	evm.model.jcf7180002766733.36	0
66- 17:	XP_010921576.1	evm.model.jcf7180002766733.31	6e-157
66- 18:	XP_010920101.1	evm.model.jcf7180002766733.27	0
66- 19:	XP_010917209.1	evm.model.jcf7180002766733.26	3e-51
66- 20:	XP_010912830.1	evm.model.jcf7180002766733.23	2e-70
66- 21:	XP_010925584.1	evm.model.jcf7180002766733.15	3e-36
66- 22:	XP_010912802.1	evm.model.jcf7180002766733.11	1e-31
## Alignment 67: score=406.0 e_value=5.6e-17 N=9 NC_025993.1&jcf7180002766754 minus
67- 0:	XP_010919404.1	evm.model.jcf7180002766754.38	0
67- 1:	XP_010919356.1	evm.model.jcf7180002766754.33	2e-108
67- 2:	XP_010919316.1	evm.model.jcf7180002766754.29	2e-152
67- 3:	XP_010919327.1	evm.model.jcf7180002766754.26	0
67- 4:	XP_010919168.1	evm.model.jcf7180002766754.24	2e-157
67- 5:	XP_010919146.1	evm.model.jcf7180002766754.19	2e-32
67- 6:	XP_010919111.1	evm.model.jcf7180002766754.17	4e-67
67- 7:	XP_010919022.1	evm.model.jcf7180002766754.15	5e-152
67- 8:	XP_010918982.2	evm.model.jcf7180002766754.8	8e-29
## Alignment 68: score=426.0 e_value=6.5e-20 N=10 NC_025993.1&jcf7180002766787 minus
68- 0:	XP_010937936.1	evm.model.jcf7180002766787.34	0
68- 1:	XP_010937875.1	evm.model.jcf7180002766787.32	8e-66
68- 2:	XP_019705063.1	evm.model.jcf7180002766787.28	0
68- 3:	XP_010937735.1	evm.model.jcf7180002766787.27	1e-178
68- 4:	XP_010937715.1	evm.model.jcf7180002766787.24	2e-39
68- 5:	XP_010937582.1	evm.model.jcf7180002766787.21	7e-60
68- 6:	XP_010939330.1	evm.model.jcf7180002766787.14	5e-120
68- 7:	XP_010939250.1	evm.model.jcf7180002766787.11	1e-26
68- 8:	XP_010939205.1	evm.model.jcf7180002766787.9	5e-37
68- 9:	XP_010939106.1	evm.model.jcf7180002766787.6	0
## Alignment 69: score=293.0 e_value=8.1e-08 N=6 NC_025993.1&jcf7180002766866 plus
69- 0:	XP_019710054.1	evm.model.jcf7180002766866.7	1e-149
69- 1:	XP_019707212.1	evm.model.jcf7180002766866.8	2
69- 2:	XP_010942675.1	evm.model.jcf7180002766866.10	0
69- 3:	XP_019709572.1	evm.model.jcf7180002766866.11	8e-153
69- 4:	XP_010942619.1	evm.model.jcf7180002766866.13	7e-95
69- 5:	XP_010942594.1	evm.model.jcf7180002766866.18	4e-140
## Alignment 70: score=942.0 e_value=1.5e-63 N=21 NC_025993.1&jcf7180002766873 plus
70- 0:	XP_010939426.1	evm.model.jcf7180002766873.6	1e-91
70- 1:	XP_010939378.1	evm.model.jcf7180002766873.7	8e-172
70- 2:	XP_010939367.1	evm.model.jcf7180002766873.10	1e-18
70- 3:	XP_010939356.1	evm.model.jcf7180002766873.14	2e-23
70- 4:	XP_010939287.1	evm.model.jcf7180002766873.22	0
70- 5:	XP_010939263.1	evm.model.jcf7180002766873.25	3e-35
70- 6:	XP_010939205.1	evm.model.jcf7180002766873.27	8e-155
70- 7:	XP_010939171.1	evm.model.jcf7180002766873.29	0
70- 8:	XP_010939067.1	evm.model.jcf7180002766873.32	8e-56
70- 9:	XP_010939040.1	evm.model.jcf7180002766873.33	0
70- 10:	XP_010939498.2	evm.model.jcf7180002766873.37	0
70- 11:	XP_010938815.1	evm.model.jcf7180002766873.38	4e-109
70- 12:	XP_010938751.1	evm.model.jcf7180002766873.41	4e-62
70- 13:	XP_010938730.1	evm.model.jcf7180002766873.42	0
70- 14:	XP_010939476.1	evm.model.jcf7180002766873.43	5e-23
70- 15:	XP_010939642.1	evm.model.jcf7180002766873.64	0
70- 16:	XP_010939655.1	evm.model.jcf7180002766873.65	3e-169
70- 17:	XP_019707792.1	evm.model.jcf7180002766873.67	2e-23
70- 18:	XP_010939679.1	evm.model.jcf7180002766873.68	3e-57
70- 19:	XP_010939822.1	evm.model.jcf7180002766873.91	0
70- 20:	XP_019705766.1	evm.model.jcf7180002766873.94	8e-136
## Alignment 71: score=278.0 e_value=1e-08 N=6 NC_025993.1&jcf7180002766873 plus
71- 0:	XP_010942037.1	evm.model.jcf7180002766873.189	0
71- 1:	XP_010942045.1	evm.model.jcf7180002766873.203	6e-39
71- 2:	XP_010942089.1	evm.model.jcf7180002766873.207	3e-126
71- 3:	XP_010942307.1	evm.model.jcf7180002766873.209	2e-17
71- 4:	XP_019708000.1	evm.model.jcf7180002766873.214	7e-30
71- 5:	XP_010943579.1	evm.model.jcf7180002766873.218	0
## Alignment 72: score=329.0 e_value=2.1e-13 N=7 NC_025993.1&jcf7180002766873 minus
72- 0:	XP_010939690.1	evm.model.jcf7180002766873.101	9e-95
72- 1:	XP_010939714.1	evm.model.jcf7180002766873.100	6e-145
72- 2:	XP_010939726.1	evm.model.jcf7180002766873.99	9e-19
72- 3:	XP_019706896.1	evm.model.jcf7180002766873.98	2e-105
72- 4:	XP_010939889.1	evm.model.jcf7180002766873.81	1e-34
72- 5:	XP_010939929.1	evm.model.jcf7180002766873.79	0
72- 6:	XP_010939967.1	evm.model.jcf7180002766873.73	6e-172
## Alignment 73: score=292.0 e_value=2.5e-09 N=6 NC_025993.1&jcf7180002766900 plus
73- 0:	XP_010905985.1	evm.model.jcf7180002766900.63	1e-104
73- 1:	XP_010905958.1	evm.model.jcf7180002766900.66	2e-140
73- 2:	XP_019705536.1	evm.model.jcf7180002766900.68	9e-10
73- 3:	XP_010905890.1	evm.model.jcf7180002766900.78	0
73- 4:	XP_010905873.1	evm.model.jcf7180002766900.80	3e-132
73- 5:	XP_010905861.1	evm.model.jcf7180002766900.82	4e-100
## Alignment 74: score=290.0 e_value=2.4e-08 N=6 NC_025993.1&jcf7180002766986 plus
74- 0:	XP_010918228.1	evm.model.jcf7180002766986.43	3e-147
74- 1:	XP_010918171.1	evm.model.jcf7180002766986.44	0
74- 2:	XP_010918160.1	evm.model.jcf7180002766986.45	0
74- 3:	XP_019704949.1	evm.model.jcf7180002766986.48	2e-47
74- 4:	XP_010918118.2	evm.model.jcf7180002766986.49	5e-116
74- 5:	XP_010918106.1	evm.model.jcf7180002766986.50	1e-18
## Alignment 75: score=605.0 e_value=1.3e-31 N=13 NC_025993.1&jcf7180002766986 minus
75- 0:	XP_010912147.1	evm.model.jcf7180002766986.34	0
75- 1:	XP_010912244.1	evm.model.jcf7180002766986.30	6e-40
75- 2:	XP_010912285.1	evm.model.jcf7180002766986.29	7e-43
75- 3:	XP_010912311.1	evm.model.jcf7180002766986.27	4e-81
75- 4:	XP_010912331.1	evm.model.jcf7180002766986.26	5e-166
75- 5:	XP_010912358.1	evm.model.jcf7180002766986.24	0
75- 6:	XP_010912370.2	evm.model.jcf7180002766986.23	6e-118
75- 7:	XP_010912409.1	evm.model.jcf7180002766986.21	5e-95
75- 8:	XP_019705420.1	evm.model.jcf7180002766986.7	2e-39
75- 9:	XP_010912571.1	evm.model.jcf7180002766986.6	0
75- 10:	XP_010912608.2	evm.model.jcf7180002766986.5	9e-101
75- 11:	XP_010912683.1	evm.model.jcf7180002766986.4	0
75- 12:	XP_019701383.1	evm.model.jcf7180002766986.3	3e-79
## Alignment 76: score=278.0 e_value=2.1e-14 N=6 NC_025993.1&jcf7180002766993 minus
76- 0:	XP_010925001.1	evm.model.jcf7180002766993.14	6e-47
76- 1:	XP_010924993.1	evm.model.jcf7180002766993.13	5e-17
76- 2:	XP_010924812.1	evm.model.jcf7180002766993.8	0
76- 3:	XP_010924760.1	evm.model.jcf7180002766993.7	8e-35
76- 4:	XP_010924749.1	evm.model.jcf7180002766993.6	2e-28
76- 5:	XP_010924727.1	evm.model.jcf7180002766993.4	4e-37
## Alignment 77: score=264.0 e_value=1.3e-08 N=6 NC_025993.1&jcf7180002766993 minus
77- 0:	XP_010925730.1	evm.model.jcf7180002766993.42	3e-64
77- 1:	XP_010925686.1	evm.model.jcf7180002766993.41	6e-136
77- 2:	XP_010925534.1	evm.model.jcf7180002766993.31	1e-98
77- 3:	XP_010925514.1	evm.model.jcf7180002766993.29	0
77- 4:	XP_010925412.1	evm.model.jcf7180002766993.27	3e-100
77- 5:	XP_010925390.1	evm.model.jcf7180002766993.24	4e-127
## Alignment 78: score=707.0 e_value=3.5e-35 N=15 NC_025993.1&jcf7180002767062 minus
78- 0:	XP_010918031.1	evm.model.jcf7180002767062.33	1e-58
78- 1:	XP_010918713.1	evm.model.jcf7180002767062.32	1e-35
78- 2:	XP_010917969.1	evm.model.jcf7180002767062.26	8e-14
78- 3:	XP_010917929.1	evm.model.jcf7180002767062.25	0
78- 4:	XP_010917863.1	evm.model.jcf7180002767062.22	4e-76
78- 5:	XP_010917763.1	evm.model.jcf7180002767062.21	7e-112
78- 6:	XP_010917741.1	evm.model.jcf7180002767062.19	0
78- 7:	XP_010917729.1	evm.model.jcf7180002767062.16	4e-143
78- 8:	XP_010917719.1	evm.model.jcf7180002767062.14	2e-134
78- 9:	XP_010917707.2	evm.model.jcf7180002767062.12	3e-57
78- 10:	XP_010917648.1	evm.model.jcf7180002767062.11	2e-102
78- 11:	XP_010917628.1	evm.model.jcf7180002767062.9	2e-45
78- 12:	XP_010917617.1	evm.model.jcf7180002767062.6	9e-21
78- 13:	XP_010917589.1	evm.model.jcf7180002767062.5	0
78- 14:	XP_010917546.1	evm.model.jcf7180002767062.1	0
## Alignment 79: score=875.0 e_value=2.1e-57 N=20 NC_025993.1&jcf7180002767105 minus
79- 0:	XP_010918233.1	evm.model.jcf7180002767105.107	4e-53
79- 1:	XP_010924392.2	evm.model.jcf7180002767105.105	0
79- 2:	XP_010916984.1	evm.model.jcf7180002767105.102	1e-31
79- 3:	XP_010916538.1	evm.model.jcf7180002767105.96	0
79- 4:	XP_010923860.1	evm.model.jcf7180002767105.95	3e-25
79- 5:	XP_010916177.1	evm.model.jcf7180002767105.94	0
79- 6:	XP_010915540.1	evm.model.jcf7180002767105.93	2e-68
79- 7:	XP_019710872.1	evm.model.jcf7180002767105.90	0
79- 8:	XP_010913433.1	evm.model.jcf7180002767105.89	0
79- 9:	NP_001290520.1	evm.model.jcf7180002767105.87	1e-92
79- 10:	XP_019704597.1	evm.model.jcf7180002767105.85	2e-89
79- 11:	XP_010912395.1	evm.model.jcf7180002767105.84	4e-29
79- 12:	XP_010940341.1	evm.model.jcf7180002767105.76	2e-64
79- 13:	XP_010935932.1	evm.model.jcf7180002767105.74	2e-62
79- 14:	XP_010933331.1	evm.model.jcf7180002767105.72	2e-159
79- 15:	XP_019705907.1	evm.model.jcf7180002767105.71	0
79- 16:	XP_010921576.1	evm.model.jcf7180002767105.70	0
79- 17:	XP_019710432.1	evm.model.jcf7180002767105.65	2e-16
79- 18:	XP_010912802.1	evm.model.jcf7180002767105.64	8e-65
79- 19:	XP_010927016.1	evm.model.jcf7180002767105.47	0
## Alignment 80: score=1130.0 e_value=1.5e-68 N=24 NC_025993.1&jcf7180002767137 minus
80- 0:	XP_019706445.1	evm.model.jcf7180002767137.62	0
80- 1:	XP_010926397.1	evm.model.jcf7180002767137.60	0
80- 2:	XP_010926375.1	evm.model.jcf7180002767137.58	1e-52
80- 3:	XP_010926244.1	evm.model.jcf7180002767137.57	0
80- 4:	XP_010926197.1	evm.model.jcf7180002767137.50	0
80- 5:	XP_010926185.1	evm.model.jcf7180002767137.49	8e-12
80- 6:	XP_010926096.1	evm.model.jcf7180002767137.45	4e-141
80- 7:	XP_010926084.1	evm.model.jcf7180002767137.44	5e-92
80- 8:	XP_010926074.1	evm.model.jcf7180002767137.42	1e-25
80- 9:	XP_010926025.1	evm.model.jcf7180002767137.39	1e-174
80- 10:	XP_019705455.1	evm.model.jcf7180002767137.34	8e-53
80- 11:	XP_019706393.1	evm.model.jcf7180002767137.33	1e-114
80- 12:	XP_019707761.1	evm.model.jcf7180002767137.31	2e-35
80- 13:	XP_010925945.1	evm.model.jcf7180002767137.30	5e-57
80- 14:	XP_010925936.1	evm.model.jcf7180002767137.28	4e-152
80- 15:	XP_019705986.1	evm.model.jcf7180002767137.26	9e-134
80- 16:	XP_010925915.1	evm.model.jcf7180002767137.25	1e-51
80- 17:	XP_010925903.1	evm.model.jcf7180002767137.23	0
80- 18:	XP_010925884.1	evm.model.jcf7180002767137.20	4e-39
80- 19:	XP_010925859.1	evm.model.jcf7180002767137.18	4e-135
80- 20:	XP_010925843.2	evm.model.jcf7180002767137.15	3e-100
80- 21:	XP_010925788.1	evm.model.jcf7180002767137.14	1e-92
80- 22:	XP_010925730.1	evm.model.jcf7180002767137.7	0
80- 23:	XP_010925695.1	evm.model.jcf7180002767137.4	2e-18
## Alignment 81: score=893.0 e_value=5.2e-50 N=19 NC_025993.1&jcf7180002767137 minus
81- 0:	XP_010914379.1	evm.model.jcf7180002767137.123	0
81- 1:	XP_010914343.1	evm.model.jcf7180002767137.120	4e-35
81- 2:	XP_010914312.1	evm.model.jcf7180002767137.118	3e-128
81- 3:	XP_019704017.1	evm.model.jcf7180002767137.114	3e-102
81- 4:	XP_010914204.1	evm.model.jcf7180002767137.113	6e-127
81- 5:	XP_010914183.1	evm.model.jcf7180002767137.110	2e-46
81- 6:	XP_010914091.1	evm.model.jcf7180002767137.105	7e-69
81- 7:	XP_010914070.1	evm.model.jcf7180002767137.104	0
81- 8:	XP_010914053.1	evm.model.jcf7180002767137.97	6e-145
81- 9:	XP_010914018.1	evm.model.jcf7180002767137.88	2e-119
81- 10:	XP_010914000.1	evm.model.jcf7180002767137.85	0
81- 11:	XP_010913987.1	evm.model.jcf7180002767137.83	2e-30
81- 12:	XP_010913965.1	evm.model.jcf7180002767137.81	5e-12
81- 13:	XP_010913915.1	evm.model.jcf7180002767137.78	1e-32
81- 14:	XP_010913831.1	evm.model.jcf7180002767137.77	0
81- 15:	XP_010913806.1	evm.model.jcf7180002767137.76	2e-115
81- 16:	XP_010913778.1	evm.model.jcf7180002767137.74	2e-164
81- 17:	XP_010913745.1	evm.model.jcf7180002767137.70	2e-82
81- 18:	XP_019710324.1	evm.model.jcf7180002767137.67	6e-56
## Alignment 82: score=591.0 e_value=7.7e-29 N=13 NC_025993.1&jcf7180002767207 minus
82- 0:	XP_019706024.1	evm.model.jcf7180002767207.57	7e-54
82- 1:	XP_010904706.1	evm.model.jcf7180002767207.54	6e-49
82- 2:	XP_010905443.1	evm.model.jcf7180002767207.51	0
82- 3:	XP_010905629.2	evm.model.jcf7180002767207.50	1e-24
82- 4:	XP_010905733.1	evm.model.jcf7180002767207.49	4e-36
82- 5:	XP_010906046.1	evm.model.jcf7180002767207.48	0
82- 6:	XP_010906842.1	evm.model.jcf7180002767207.42	3e-44
82- 7:	XP_010907204.1	evm.model.jcf7180002767207.40	0
82- 8:	XP_010907540.1	evm.model.jcf7180002767207.38	0
82- 9:	XP_010908044.1	evm.model.jcf7180002767207.27	9e-146
82- 10:	XP_010908684.1	evm.model.jcf7180002767207.23	0
82- 11:	XP_010908963.1	evm.model.jcf7180002767207.20	4e-85
82- 12:	XP_010909190.1	evm.model.jcf7180002767207.17	0
## Alignment 83: score=277.0 e_value=1.5e-08 N=6 NC_025993.1&jcf7180002767254 minus
83- 0:	XP_010918561.1	evm.model.jcf7180002767254.17	1e-142
83- 1:	XP_010918551.1	evm.model.jcf7180002767254.15	4e-164
83- 2:	XP_010918519.1	evm.model.jcf7180002767254.8	2e-17
83- 3:	XP_010918418.1	evm.model.jcf7180002767254.6	0
83- 4:	XP_010918408.1	evm.model.jcf7180002767254.2	2e-16
83- 5:	XP_010918395.1	evm.model.jcf7180002767254.1	2e-102
## Alignment 84: score=588.0 e_value=1.5e-30 N=13 NC_025993.1&jcf7180002767273 plus
84- 0:	XP_010914787.1	evm.model.jcf7180002767273.4	0
84- 1:	XP_010914749.1	evm.model.jcf7180002767273.10	1e-85
84- 2:	XP_019706259.1	evm.model.jcf7180002767273.12	7e-25
84- 3:	XP_010918670.1	evm.model.jcf7180002767273.33	0
84- 4:	XP_010918620.1	evm.model.jcf7180002767273.35	7e-97
84- 5:	XP_010918608.1	evm.model.jcf7180002767273.36	0
84- 6:	XP_010918561.1	evm.model.jcf7180002767273.48	1e-136
84- 7:	XP_010918551.1	evm.model.jcf7180002767273.52	2e-170
84- 8:	XP_010918519.1	evm.model.jcf7180002767273.56	5e-138
84- 9:	XP_010918418.1	evm.model.jcf7180002767273.62	0
84- 10:	XP_010918408.1	evm.model.jcf7180002767273.63	4e-98
84- 11:	XP_010918395.1	evm.model.jcf7180002767273.64	2e-115
84- 12:	XP_010918347.1	evm.model.jcf7180002767273.102	2e-81
## Alignment 85: score=327.0 e_value=5.6e-11 N=7 NC_025993.1&jcf7180002767273 plus
85- 0:	XP_010939030.1	evm.model.jcf7180002767273.120	1e-138
85- 1:	XP_010939209.1	evm.model.jcf7180002767273.122	0
85- 2:	XP_010939579.1	evm.model.jcf7180002767273.123	0
85- 3:	XP_010912967.1	evm.model.jcf7180002767273.128	2e-77
85- 4:	XP_010941013.1	evm.model.jcf7180002767273.140	3e-162
85- 5:	XP_010941878.1	evm.model.jcf7180002767273.143	3e-99
85- 6:	XP_010942001.1	evm.model.jcf7180002767273.145	2e-10
## Alignment 86: score=556.0 e_value=3.5e-26 N=12 NC_025993.1&jcf7180002767273 minus
86- 0:	XP_010905443.1	evm.model.jcf7180002767273.112	0
86- 1:	XP_010905629.2	evm.model.jcf7180002767273.107	5e-30
86- 2:	XP_010906046.1	evm.model.jcf7180002767273.102	0
86- 3:	XP_010906842.1	evm.model.jcf7180002767273.99	0
86- 4:	XP_010907204.1	evm.model.jcf7180002767273.98	0
86- 5:	XP_010907540.1	evm.model.jcf7180002767273.95	0
86- 6:	XP_010908044.1	evm.model.jcf7180002767273.88	1e-84
86- 7:	XP_010908684.1	evm.model.jcf7180002767273.85	0
86- 8:	XP_010913066.1	evm.model.jcf7180002767273.84	3e-65
86- 9:	XP_010908963.1	evm.model.jcf7180002767273.83	6e-106
86- 10:	XP_010909078.1	evm.model.jcf7180002767273.82	2e-18
86- 11:	XP_010909190.1	evm.model.jcf7180002767273.81	5e-138
## Alignment 87: score=472.0 e_value=2.2e-22 N=10 NC_025993.1&jcf7180002767306 minus
87- 0:	XP_010937360.1	evm.model.jcf7180002767306.64	6e-104
87- 1:	XP_010935668.1	evm.model.jcf7180002767306.63	1e-63
87- 2:	XP_010935626.1	evm.model.jcf7180002767306.58	0
87- 3:	XP_010938481.1	evm.model.jcf7180002767306.42	5e-39
87- 4:	XP_010938472.1	evm.model.jcf7180002767306.34	7e-29
87- 5:	XP_019705026.1	evm.model.jcf7180002767306.27	3e-32
87- 6:	XP_010938447.1	evm.model.jcf7180002767306.23	5e-104
87- 7:	XP_010938379.1	evm.model.jcf7180002767306.19	0
87- 8:	XP_010938344.1	evm.model.jcf7180002767306.11	6e-17
87- 9:	XP_010938316.1	evm.model.jcf7180002767306.8	2e-58
## Alignment 88: score=575.0 e_value=1e-37 N=13 NC_025993.1&jcf7180002767350 plus
88- 0:	XP_019708615.1	evm.model.jcf7180002767350.30	4e-132
88- 1:	XP_010917496.2	evm.model.jcf7180002767350.75	0
88- 2:	XP_010917486.2	evm.model.jcf7180002767350.76	0
88- 3:	XP_010916969.1	evm.model.jcf7180002767350.78	9e-130
88- 4:	XP_010916944.1	evm.model.jcf7180002767350.80	2e-109
88- 5:	XP_010916830.1	evm.model.jcf7180002767350.88	1e-63
88- 6:	XP_019708506.1	evm.model.jcf7180002767350.90	9e-23
88- 7:	XP_019705947.1	evm.model.jcf7180002767350.94	4e-29
88- 8:	XP_019705480.1	evm.model.jcf7180002767350.95	5e-34
88- 9:	XP_010916758.1	evm.model.jcf7180002767350.98	3e-138
88- 10:	XP_010916623.1	evm.model.jcf7180002767350.121	4e-94
88- 11:	XP_010916493.1	evm.model.jcf7180002767350.122	1e-40
88- 12:	XP_010916480.1	evm.model.jcf7180002767350.123	2e-45
## Alignment 89: score=517.0 e_value=2.4e-32 N=12 NC_025993.1&jcf7180002767350 plus
89- 0:	XP_019708639.1	evm.model.jcf7180002767350.3	7e-54
89- 1:	XP_010912226.1	evm.model.jcf7180002767350.7	0
89- 2:	XP_019703901.1	evm.model.jcf7180002767350.9	1e-15
89- 3:	XP_010912285.1	evm.model.jcf7180002767350.12	3e-97
89- 4:	XP_010912311.1	evm.model.jcf7180002767350.13	8e-109
89- 5:	XP_010912398.1	evm.model.jcf7180002767350.15	1e-99
89- 6:	XP_019708288.1	evm.model.jcf7180002767350.17	8e-23
89- 7:	XP_019705420.1	evm.model.jcf7180002767350.25	2e-38
89- 8:	XP_010912571.1	evm.model.jcf7180002767350.26	1e-21
89- 9:	XP_010912702.1	evm.model.jcf7180002767350.29	0
89- 10:	XP_010914379.1	evm.model.jcf7180002767350.62	0
89- 11:	XP_019704017.1	evm.model.jcf7180002767350.91	7e-09
## Alignment 90: score=461.0 e_value=6.2e-22 N=10 NC_025993.1&jcf7180002767350 plus
90- 0:	XP_010916069.1	evm.model.jcf7180002767350.117	0.5
90- 1:	XP_010916059.1	evm.model.jcf7180002767350.136	4e-180
90- 2:	XP_010915985.1	evm.model.jcf7180002767350.138	1e-102
90- 3:	XP_010915933.1	evm.model.jcf7180002767350.140	0
90- 4:	XP_010915914.2	evm.model.jcf7180002767350.141	3e-24
90- 5:	XP_010915873.1	evm.model.jcf7180002767350.144	2e-90
90- 6:	XP_010915862.1	evm.model.jcf7180002767350.147	2e-137
90- 7:	XP_019705584.1	evm.model.jcf7180002767350.149	5e-67
90- 8:	XP_010915718.2	evm.model.jcf7180002767350.150	0
90- 9:	XP_010915683.1	evm.model.jcf7180002767350.151	6e-49
## Alignment 91: score=343.0 e_value=3.7e-13 N=8 NC_025993.1&jcf7180002767350 minus
91- 0:	XP_010914657.1	evm.model.jcf7180002767350.70	1e-62
91- 1:	XP_010914410.1	evm.model.jcf7180002767350.68	0
91- 2:	XP_010914312.1	evm.model.jcf7180002767350.61	3e-28
91- 3:	XP_010914183.1	evm.model.jcf7180002767350.57	5e-107
91- 4:	XP_010914053.1	evm.model.jcf7180002767350.55	0
91- 5:	XP_010914018.1	evm.model.jcf7180002767350.50	1e-170
91- 6:	XP_010913890.1	evm.model.jcf7180002767350.49	6e-133
91- 7:	XP_010913806.1	evm.model.jcf7180002767350.46	6e-103
## Alignment 92: score=708.0 e_value=5.6e-41 N=16 NC_025993.1&jcf7180002767370 plus
92- 0:	XP_010916099.1	evm.model.jcf7180002767370.1	0
92- 1:	XP_010915966.2	evm.model.jcf7180002767370.2	9e-15
92- 2:	XP_010915914.2	evm.model.jcf7180002767370.9	0
92- 3:	XP_019704081.1	evm.model.jcf7180002767370.22	3e-24
92- 4:	XP_019701321.1	evm.model.jcf7180002767370.28	3e-112
92- 5:	XP_019711082.1	evm.model.jcf7180002767370.29	0
92- 6:	XP_010915447.1	evm.model.jcf7180002767370.30	2e-48
92- 7:	XP_010915345.1	evm.model.jcf7180002767370.38	3e-75
92- 8:	XP_010915232.1	evm.model.jcf7180002767370.41	9e-89
92- 9:	XP_010915202.1	evm.model.jcf7180002767370.43	0
92- 10:	XP_010917300.2	evm.model.jcf7180002767370.47	2e-39
92- 11:	XP_010914972.1	evm.model.jcf7180002767370.54	2e-82
92- 12:	XP_010914922.1	evm.model.jcf7180002767370.56	2e-40
92- 13:	XP_010914897.1	evm.model.jcf7180002767370.57	1e-30
92- 14:	XP_010914811.1	evm.model.jcf7180002767370.63	0
92- 15:	XP_010914798.1	evm.model.jcf7180002767370.64	4e-43
## Alignment 93: score=1410.0 e_value=1.4e-96 N=30 NC_025993.1&jcf7180002767402 plus
93- 0:	XP_019710864.1	evm.model.jcf7180002767402.70	0
93- 1:	XP_010917115.1	evm.model.jcf7180002767402.71	3e-43
93- 2:	XP_010917106.1	evm.model.jcf7180002767402.74	0
93- 3:	XP_010917069.1	evm.model.jcf7180002767402.79	0
93- 4:	XP_010917020.1	evm.model.jcf7180002767402.81	0
93- 5:	XP_010917001.1	evm.model.jcf7180002767402.82	3e-34
93- 6:	XP_010916969.1	evm.model.jcf7180002767402.83	4e-126
93- 7:	XP_010916932.1	evm.model.jcf7180002767402.85	8e-65
93- 8:	XP_010916908.1	evm.model.jcf7180002767402.90	9e-57
93- 9:	XP_010916896.1	evm.model.jcf7180002767402.95	2e-82
93- 10:	XP_010916861.1	evm.model.jcf7180002767402.99	1e-150
93- 11:	XP_010916837.1	evm.model.jcf7180002767402.110	3e-146
93- 12:	XP_019708506.1	evm.model.jcf7180002767402.116	6e-23
93- 13:	XP_010916758.1	evm.model.jcf7180002767402.126	4e-28
93- 14:	XP_010916718.1	evm.model.jcf7180002767402.144	0
93- 15:	XP_010916687.1	evm.model.jcf7180002767402.146	9e-132
93- 16:	XP_010916623.1	evm.model.jcf7180002767402.154	5e-150
93- 17:	XP_010916525.1	evm.model.jcf7180002767402.155	4e-24
93- 18:	XP_019707102.1	evm.model.jcf7180002767402.158	0
93- 19:	XP_010916480.1	evm.model.jcf7180002767402.159	2e-55
93- 20:	XP_010916387.1	evm.model.jcf7180002767402.160	0
93- 21:	XP_010916374.2	evm.model.jcf7180002767402.164	0
93- 22:	XP_010916355.1	evm.model.jcf7180002767402.165	6e-33
93- 23:	XP_010916196.1	evm.model.jcf7180002767402.183	2e-22
93- 24:	XP_010916111.1	evm.model.jcf7180002767402.192	3e-36
93- 25:	XP_019702418.1	evm.model.jcf7180002767402.195	2e-28
93- 26:	XP_010916036.1	evm.model.jcf7180002767402.197	3e-134
93- 27:	XP_010916009.1	evm.model.jcf7180002767402.198	0
93- 28:	XP_010915998.1	evm.model.jcf7180002767402.199	0
93- 29:	XP_010915966.2	evm.model.jcf7180002767402.200	0
## Alignment 94: score=950.0 e_value=1.5e-54 N=20 NC_025993.1&jcf7180002767402 minus
94- 0:	XP_019705986.1	evm.model.jcf7180002767402.60	2e-130
94- 1:	XP_010925915.1	evm.model.jcf7180002767402.57	4e-54
94- 2:	XP_010925903.1	evm.model.jcf7180002767402.56	0
94- 3:	XP_010925884.1	evm.model.jcf7180002767402.54	0
94- 4:	XP_010925859.1	evm.model.jcf7180002767402.53	2e-116
94- 5:	XP_010925843.2	evm.model.jcf7180002767402.51	2e-97
94- 6:	XP_010925832.1	evm.model.jcf7180002767402.50	0
94- 7:	XP_010925788.1	evm.model.jcf7180002767402.49	1e-81
94- 8:	XP_010925695.1	evm.model.jcf7180002767402.43	1e-22
94- 9:	XP_010925654.1	evm.model.jcf7180002767402.40	1e-14
94- 10:	XP_010925641.1	evm.model.jcf7180002767402.39	0
94- 11:	XP_010925558.1	evm.model.jcf7180002767402.37	1e-99
94- 12:	XP_010925495.1	evm.model.jcf7180002767402.30	9e-135
94- 13:	XP_010925482.1	evm.model.jcf7180002767402.29	0
94- 14:	XP_010925444.1	evm.model.jcf7180002767402.21	1e-20
94- 15:	XP_010925423.1	evm.model.jcf7180002767402.16	2e-73
94- 16:	XP_010927277.1	evm.model.jcf7180002767402.13	5e-47
94- 17:	XP_010927265.1	evm.model.jcf7180002767402.9	0
94- 18:	XP_010925337.1	evm.model.jcf7180002767402.6	1e-07
94- 19:	XP_010925278.1	evm.model.jcf7180002767402.1	1e-127
## Alignment 95: score=1216.0 e_value=1.6e-90 N=29 NC_025993.1&jcf7180002767435 minus
95- 0:	XP_010926676.1	evm.model.jcf7180002767435.167	0
95- 1:	XP_010926512.1	evm.model.jcf7180002767435.165	8e-46
95- 2:	XP_010926460.1	evm.model.jcf7180002767435.162	3e-138
95- 3:	XP_019706445.1	evm.model.jcf7180002767435.158	0
95- 4:	XP_010926397.1	evm.model.jcf7180002767435.156	0
95- 5:	XP_010926244.1	evm.model.jcf7180002767435.155	0
95- 6:	XP_010926197.1	evm.model.jcf7180002767435.152	0
95- 7:	XP_019703269.1	evm.model.jcf7180002767435.151	8e-55
95- 8:	XP_019701503.1	evm.model.jcf7180002767435.149	0
95- 9:	XP_010926118.1	evm.model.jcf7180002767435.148	0
95- 10:	XP_019706384.1	evm.model.jcf7180002767435.145	8e-47
95- 11:	XP_010926084.1	evm.model.jcf7180002767435.142	3e-155
95- 12:	XP_010926074.1	evm.model.jcf7180002767435.141	5e-89
95- 13:	XP_019705455.1	evm.model.jcf7180002767435.135	0
95- 14:	XP_010925843.2	evm.model.jcf7180002767435.128	4e-92
95- 15:	XP_010925664.1	evm.model.jcf7180002767435.124	0
95- 16:	XP_010925525.1	evm.model.jcf7180002767435.122	0
95- 17:	XP_010925403.1	evm.model.jcf7180002767435.118	1e-120
95- 18:	XP_010925356.1	evm.model.jcf7180002767435.117	7e-63
95- 19:	XP_010925390.1	evm.model.jcf7180002767435.116	0
95- 20:	XP_010925212.1	evm.model.jcf7180002767435.110	7e-12
95- 21:	XP_010925155.1	evm.model.jcf7180002767435.106	1e-34
95- 22:	XP_010925001.1	evm.model.jcf7180002767435.101	8e-127
95- 23:	XP_010924812.1	evm.model.jcf7180002767435.97	0
95- 24:	XP_010924749.1	evm.model.jcf7180002767435.96	2e-27
95- 25:	XP_010924704.1	evm.model.jcf7180002767435.91	3e-162
95- 26:	XP_019706426.1	evm.model.jcf7180002767435.87	2e-58
95- 27:	XP_019701415.1	evm.model.jcf7180002767435.84	0
95- 28:	XP_010924208.1	evm.model.jcf7180002767435.82	0
## Alignment 96: score=1056.0 e_value=1.1e-65 N=23 NC_025993.1&jcf7180002767447 minus
96- 0:	XP_010904652.1	evm.model.jcf7180002767447.58	9e-60
96- 1:	XP_010904666.1	evm.model.jcf7180002767447.57	0
96- 2:	XP_010904720.1	evm.model.jcf7180002767447.56	0
96- 3:	XP_010904734.1	evm.model.jcf7180002767447.55	1e-138
96- 4:	XP_010904805.1	evm.model.jcf7180002767447.52	5e-164
96- 5:	XP_019704431.1	evm.model.jcf7180002767447.48	3e-37
96- 6:	XP_010904871.1	evm.model.jcf7180002767447.44	5e-72
96- 7:	XP_010904882.1	evm.model.jcf7180002767447.42	0
96- 8:	XP_010905719.1	evm.model.jcf7180002767447.38	1e-10
96- 9:	XP_019709447.1	evm.model.jcf7180002767447.36	1e-50
96- 10:	XP_010905064.1	evm.model.jcf7180002767447.33	6e-122
96- 11:	XP_010905120.1	evm.model.jcf7180002767447.32	2e-85
96- 12:	XP_010905211.1	evm.model.jcf7180002767447.26	3e-102
96- 13:	XP_010905789.1	evm.model.jcf7180002767447.23	1e-108
96- 14:	XP_010905238.1	evm.model.jcf7180002767447.22	0
96- 15:	XP_010905265.1	evm.model.jcf7180002767447.20	1e-40
96- 16:	XP_010905287.1	evm.model.jcf7180002767447.18	0
96- 17:	XP_010905374.1	evm.model.jcf7180002767447.17	2e-43
96- 18:	XP_010905390.1	evm.model.jcf7180002767447.15	0
96- 19:	XP_010905485.1	evm.model.jcf7180002767447.12	1e-28
96- 20:	XP_010905493.1	evm.model.jcf7180002767447.10	0
96- 21:	XP_010905518.1	evm.model.jcf7180002767447.9	0
96- 22:	XP_010905633.1	evm.model.jcf7180002767447.7	2e-156
## Alignment 97: score=360.0 e_value=1.5e-15 N=8 NC_025993.1&jcf7180002767447 minus
97- 0:	XP_010928068.1	evm.model.jcf7180002767447.74	2e-64
97- 1:	XP_010927720.1	evm.model.jcf7180002767447.71	2e-87
97- 2:	XP_010928203.1	evm.model.jcf7180002767447.68	0
97- 3:	XP_019707302.1	evm.model.jcf7180002767447.67	1e-41
97- 4:	XP_010927865.2	evm.model.jcf7180002767447.66	3e-167
97- 5:	XP_010927881.1	evm.model.jcf7180002767447.64	3e-36
97- 6:	XP_010927890.1	evm.model.jcf7180002767447.63	0
97- 7:	XP_010927924.1	evm.model.jcf7180002767447.61	3e-102
## Alignment 98: score=329.0 e_value=2e-10 N=7 NC_025993.1&jcf7180002767449 plus
98- 0:	XP_010920339.1	evm.model.jcf7180002767449.2	0
98- 1:	XP_019707246.1	evm.model.jcf7180002767449.6	1e-108
98- 2:	XP_019704744.1	evm.model.jcf7180002767449.9	8e-45
98- 3:	XP_010920210.1	evm.model.jcf7180002767449.11	5e-14
98- 4:	XP_010920194.2	evm.model.jcf7180002767449.14	1e-116
98- 5:	XP_010920938.1	evm.model.jcf7180002767449.16	6e-84
98- 6:	XP_010920128.1	evm.model.jcf7180002767449.21	0
## Alignment 99: score=389.0 e_value=4.9e-14 N=8 NC_025993.1&jcf7180002767488 plus
99- 0:	XP_010940400.1	evm.model.jcf7180002767488.19	1e-83
99- 1:	XP_010940425.1	evm.model.jcf7180002767488.30	5e-18
99- 2:	XP_010940445.1	evm.model.jcf7180002767488.32	0
99- 3:	XP_010940469.1	evm.model.jcf7180002767488.36	1e-29
99- 4:	XP_010940481.1	evm.model.jcf7180002767488.37	3e-111
99- 5:	XP_010940494.1	evm.model.jcf7180002767488.38	2e-13
99- 6:	XP_010940507.1	evm.model.jcf7180002767488.40	4e-28
99- 7:	XP_010940543.1	evm.model.jcf7180002767488.41	4e-29
## Alignment 100: score=530.0 e_value=1.5e-28 N=12 NC_025993.1&jcf7180002767535 minus
100- 0:	XP_010939006.1	evm.model.jcf7180002767535.54	0
100- 1:	XP_019709246.1	evm.model.jcf7180002767535.52	0
100- 2:	XP_010938843.1	evm.model.jcf7180002767535.51	4e-145
100- 3:	XP_010938815.1	evm.model.jcf7180002767535.50	4e-109
100- 4:	XP_019703726.1	evm.model.jcf7180002767535.49	0
100- 5:	XP_010938783.1	evm.model.jcf7180002767535.47	0
100- 6:	XP_019706887.1	evm.model.jcf7180002767535.46	3e-36
100- 7:	XP_010938737.1	evm.model.jcf7180002767535.43	0
100- 8:	XP_010938699.1	evm.model.jcf7180002767535.42	2e-38
100- 9:	XP_010939679.1	evm.model.jcf7180002767535.27	0
100- 10:	XP_019707670.1	evm.model.jcf7180002767535.19	1e-25
100- 11:	XP_010939967.1	evm.model.jcf7180002767535.18	2e-155
## Alignment 101: score=611.0 e_value=5.6e-34 N=14 NC_025993.1&jcf7180002767536 plus
101- 0:	NP_001290521.1	evm.model.jcf7180002767536.2	7e-120
101- 1:	XP_010937961.1	evm.model.jcf7180002767536.5	0
101- 2:	XP_010938540.1	evm.model.jcf7180002767536.6	2e-53
101- 3:	XP_010937875.1	evm.model.jcf7180002767536.11	3e-51
101- 4:	XP_019705063.1	evm.model.jcf7180002767536.16	7e-175
101- 5:	XP_010937601.1	evm.model.jcf7180002767536.19	6e-56
101- 6:	XP_010937582.1	evm.model.jcf7180002767536.22	2e-59
101- 7:	XP_010939330.1	evm.model.jcf7180002767536.29	2e-120
101- 8:	XP_010939250.1	evm.model.jcf7180002767536.32	2e-66
101- 9:	XP_010939205.1	evm.model.jcf7180002767536.34	8e-105
101- 10:	XP_010939106.1	evm.model.jcf7180002767536.37	0
101- 11:	XP_010939067.1	evm.model.jcf7180002767536.39	4e-64
101- 12:	XP_010939052.1	evm.model.jcf7180002767536.41	0
101- 13:	XP_010939031.1	evm.model.jcf7180002767536.42	2e-100
## Alignment 102: score=383.0 e_value=2e-14 N=8 NC_025993.1&jcf7180002767559 minus
102- 0:	XP_010940336.1	evm.model.jcf7180002767559.28	4e-33
102- 1:	XP_010940367.1	evm.model.jcf7180002767559.24	3e-146
102- 2:	XP_010940400.1	evm.model.jcf7180002767559.23	7e-61
102- 3:	XP_010940425.1	evm.model.jcf7180002767559.17	5e-53
102- 4:	XP_010940445.1	evm.model.jcf7180002767559.16	0
102- 5:	XP_010940458.1	evm.model.jcf7180002767559.14	0
102- 6:	XP_010940507.1	evm.model.jcf7180002767559.10	6e-119
102- 7:	XP_010940543.1	evm.model.jcf7180002767559.9	3e-63
## Alignment 103: score=346.0 e_value=1.2e-10 N=7 NC_025993.1&jcf7180002767576 plus
103- 0:	XP_010920378.1	evm.model.jcf7180002767576.3	0
103- 1:	XP_010920369.1	evm.model.jcf7180002767576.4	1e-70
103- 2:	XP_010920360.1	evm.model.jcf7180002767576.6	9e-16
103- 3:	XP_010920350.1	evm.model.jcf7180002767576.7	1e-43
103- 4:	XP_010920329.1	evm.model.jcf7180002767576.8	3e-25
103- 5:	XP_010920310.1	evm.model.jcf7180002767576.10	0
103- 6:	XP_010920278.1	evm.model.jcf7180002767576.11	9e-174
## Alignment 104: score=712.0 e_value=0 N=16 NC_025993.1&jcf7180002767727 minus
104- 0:	XP_010942070.1	evm.model.jcf7180002767727.106	3e-81
104- 1:	XP_010942089.1	evm.model.jcf7180002767727.101	4e-67
104- 2:	XP_010942307.1	evm.model.jcf7180002767727.99	4e-12
104- 3:	XP_010942330.1	evm.model.jcf7180002767727.93	1e-32
104- 4:	XP_010942340.1	evm.model.jcf7180002767727.92	1e-27
104- 5:	XP_010943602.1	evm.model.jcf7180002767727.83	0
104- 6:	XP_010943413.1	evm.model.jcf7180002767727.65	8e-101
104- 7:	XP_010943398.1	evm.model.jcf7180002767727.59	0
104- 8:	XP_010943379.1	evm.model.jcf7180002767727.56	3e-31
104- 9:	XP_010943349.1	evm.model.jcf7180002767727.54	3e-28
104- 10:	XP_010943299.1	evm.model.jcf7180002767727.38	6e-85
104- 11:	XP_010943126.1	evm.model.jcf7180002767727.10	0
104- 12:	XP_010943025.1	evm.model.jcf7180002767727.9	6e-72
104- 13:	XP_010942913.1	evm.model.jcf7180002767727.6	3e-97
104- 14:	XP_010942885.1	evm.model.jcf7180002767727.2	1e-108
104- 15:	XP_010942893.1	evm.model.jcf7180002767727.1	3e-43
## Alignment 105: score=319.0 e_value=1.4e-12 N=7 NC_025993.1&jcf7180002767743 plus
105- 0:	XP_010904849.1	evm.model.jcf7180002767743.12	1e-63
105- 1:	XP_019704431.1	evm.model.jcf7180002767743.15	2e-16
105- 2:	XP_010904861.1	evm.model.jcf7180002767743.17	4e-86
105- 3:	XP_010904895.2	evm.model.jcf7180002767743.25	3e-135
105- 4:	XP_010904915.1	evm.model.jcf7180002767743.26	2e-42
105- 5:	XP_019709449.1	evm.model.jcf7180002767743.30	3e-12
105- 6:	XP_010905110.1	evm.model.jcf7180002767743.32	3e-36
## Alignment 106: score=923.0 e_value=1.1e-50 N=19 NC_025993.1&jcf7180002767772 minus
106- 0:	XP_010920268.1	evm.model.jcf7180002767772.42	0
106- 1:	XP_010920258.1	evm.model.jcf7180002767772.39	2e-20
106- 2:	XP_019704744.1	evm.model.jcf7180002767772.38	5e-63
106- 3:	XP_010920225.1	evm.model.jcf7180002767772.35	1e-55
106- 4:	XP_010920210.1	evm.model.jcf7180002767772.34	4e-86
106- 5:	XP_010920938.1	evm.model.jcf7180002767772.33	2e-47
106- 6:	XP_019707893.1	evm.model.jcf7180002767772.32	6e-23
106- 7:	XP_010920176.1	evm.model.jcf7180002767772.31	2e-96
106- 8:	XP_010920155.1	evm.model.jcf7180002767772.29	3e-51
106- 9:	XP_010920116.1	evm.model.jcf7180002767772.28	0
106- 10:	XP_010920079.1	evm.model.jcf7180002767772.25	4e-73
106- 11:	XP_019705385.1	evm.model.jcf7180002767772.23	4e-106
106- 12:	XP_010920039.1	evm.model.jcf7180002767772.19	6e-36
106- 13:	XP_010919994.1	evm.model.jcf7180002767772.17	4e-51
106- 14:	XP_019708678.1	evm.model.jcf7180002767772.16	5e-67
106- 15:	XP_010919966.1	evm.model.jcf7180002767772.13	3e-19
106- 16:	XP_010919890.1	evm.model.jcf7180002767772.10	6e-13
106- 17:	XP_010919848.1	evm.model.jcf7180002767772.8	6e-103
106- 18:	XP_019703770.1	evm.model.jcf7180002767772.2	5e-170
## Alignment 107: score=1387.0 e_value=7.6e-96 N=30 NC_025993.1&jcf7180002767810 minus
107- 0:	XP_010943579.1	evm.model.jcf7180002767810.106	0
107- 1:	XP_010943534.1	evm.model.jcf7180002767810.96	0
107- 2:	XP_010943505.1	evm.model.jcf7180002767810.94	4e-104
107- 3:	XP_010943424.1	evm.model.jcf7180002767810.92	0
107- 4:	XP_010943413.1	evm.model.jcf7180002767810.91	3e-23
107- 5:	XP_010943406.1	evm.model.jcf7180002767810.88	3e-120
107- 6:	XP_010943379.1	evm.model.jcf7180002767810.87	5e-28
107- 7:	XP_010943325.1	evm.model.jcf7180002767810.84	4e-50
107- 8:	XP_019704954.1	evm.model.jcf7180002767810.79	4e-33
107- 9:	XP_010943299.1	evm.model.jcf7180002767810.74	0
107- 10:	XP_010943282.1	evm.model.jcf7180002767810.73	2e-57
107- 11:	XP_010943272.1	evm.model.jcf7180002767810.72	0
107- 12:	XP_010943220.1	evm.model.jcf7180002767810.71	0
107- 13:	XP_010943189.1	evm.model.jcf7180002767810.68	0
107- 14:	XP_010943167.1	evm.model.jcf7180002767810.66	4e-164
107- 15:	XP_010942977.1	evm.model.jcf7180002767810.56	6e-26
107- 16:	XP_010942945.1	evm.model.jcf7180002767810.55	2e-74
107- 17:	XP_010942928.1	evm.model.jcf7180002767810.53	6e-68
107- 18:	XP_010942826.1	evm.model.jcf7180002767810.46	0
107- 19:	XP_010942706.1	evm.model.jcf7180002767810.40	9e-32
107- 20:	XP_010943751.1	evm.model.jcf7180002767810.35	3e-49
107- 21:	XP_019710054.1	evm.model.jcf7180002767810.32	0
107- 22:	XP_010942675.1	evm.model.jcf7180002767810.30	1e-123
107- 23:	XP_019709572.1	evm.model.jcf7180002767810.29	2e-116
107- 24:	XP_010942594.1	evm.model.jcf7180002767810.25	1e-102
107- 25:	XP_010942536.1	evm.model.jcf7180002767810.23	2e-53
107- 26:	XP_010942471.1	evm.model.jcf7180002767810.20	2e-74
107- 27:	XP_010942448.1	evm.model.jcf7180002767810.18	5e-09
107- 28:	XP_010942390.1	evm.model.jcf7180002767810.16	2e-124
107- 29:	XP_019702369.1	evm.model.jcf7180002767810.14	1e-94
## Alignment 108: score=592.0 e_value=1.6e-32 N=14 NC_025993.1&jcf7180002767933 minus
108- 0:	XP_010934404.1	evm.model.jcf7180002767933.57	2e-140
108- 1:	XP_010934445.2	evm.model.jcf7180002767933.56	0
108- 2:	XP_010934528.1	evm.model.jcf7180002767933.53	5e-11
108- 3:	XP_010935492.2	evm.model.jcf7180002767933.52	2e-31
108- 4:	XP_010934573.2	evm.model.jcf7180002767933.48	1e-77
108- 5:	XP_010934640.1	evm.model.jcf7180002767933.47	0
108- 6:	XP_010934707.1	evm.model.jcf7180002767933.46	6e-105
108- 7:	XP_010934792.1	evm.model.jcf7180002767933.42	0
108- 8:	XP_010934842.1	evm.model.jcf7180002767933.41	9e-138
108- 9:	XP_010935059.1	evm.model.jcf7180002767933.35	0
108- 10:	XP_010937254.1	evm.model.jcf7180002767933.31	0
108- 11:	XP_010937215.1	evm.model.jcf7180002767933.29	2e-150
108- 12:	XP_010937096.1	evm.model.jcf7180002767933.27	6e-76
108- 13:	XP_019704736.1	evm.model.jcf7180002767933.23	5e-62
## Alignment 109: score=587.0 e_value=3.2e-30 N=13 NC_025993.1&jcf7180002768056 plus
109- 0:	XP_010918255.1	evm.model.jcf7180002768056.35	4e-120
109- 1:	XP_010918228.1	evm.model.jcf7180002768056.36	0
109- 2:	XP_010918171.1	evm.model.jcf7180002768056.39	6e-73
109- 3:	XP_010918160.1	evm.model.jcf7180002768056.41	0
109- 4:	XP_019706269.1	evm.model.jcf7180002768056.45	6e-123
109- 5:	XP_010918088.1	evm.model.jcf7180002768056.46	3e-97
109- 6:	XP_010917969.1	evm.model.jcf7180002768056.54	4e-74
109- 7:	XP_010917863.1	evm.model.jcf7180002768056.58	5e-89
109- 8:	XP_010917741.1	evm.model.jcf7180002768056.64	0
109- 9:	XP_010917729.1	evm.model.jcf7180002768056.66	2e-153
109- 10:	XP_019705436.1	evm.model.jcf7180002768056.71	1e-33
109- 11:	XP_010917719.1	evm.model.jcf7180002768056.73	1e-141
109- 12:	XP_010917707.2	evm.model.jcf7180002768056.75	2e-140
## Alignment 110: score=478.0 e_value=1.1e-20 N=10 NC_025993.1&jcf7180002768058 minus
110- 0:	XP_010928743.1	evm.model.jcf7180002768058.25	1e-71
110- 1:	XP_010928623.1	evm.model.jcf7180002768058.24	7e-25
110- 2:	XP_010928613.1	evm.model.jcf7180002768058.23	4e-60
110- 3:	XP_010928536.1	evm.model.jcf7180002768058.19	0
110- 4:	XP_010928528.1	evm.model.jcf7180002768058.17	1e-19
110- 5:	XP_010928517.1	evm.model.jcf7180002768058.16	5e-130
110- 6:	XP_010928474.1	evm.model.jcf7180002768058.15	5e-50
110- 7:	XP_010928462.1	evm.model.jcf7180002768058.14	0
110- 8:	XP_010928371.1	evm.model.jcf7180002768058.13	7e-76
110- 9:	XP_019705207.1	evm.model.jcf7180002768058.9	3e-18
## Alignment 111: score=636.0 e_value=2.7e-32 N=14 NC_025993.1&jcf7180002768092 plus
111- 0:	XP_010920065.1	evm.model.jcf7180002768092.4	6e-66
111- 1:	XP_010919700.1	evm.model.jcf7180002768092.8	0
111- 2:	XP_010918233.1	evm.model.jcf7180002768092.15	3e-64
111- 3:	XP_010918127.1	evm.model.jcf7180002768092.17	0
111- 4:	XP_010924392.2	evm.model.jcf7180002768092.19	5e-45
111- 5:	XP_010917210.1	evm.model.jcf7180002768092.22	3e-83
111- 6:	XP_010916984.1	evm.model.jcf7180002768092.25	2e-143
111- 7:	XP_019707350.1	evm.model.jcf7180002768092.27	0
111- 8:	XP_019708972.1	evm.model.jcf7180002768092.29	0
111- 9:	XP_010923860.1	evm.model.jcf7180002768092.31	0
111- 10:	XP_010916177.1	evm.model.jcf7180002768092.33	0
111- 11:	XP_010915540.1	evm.model.jcf7180002768092.35	2e-68
111- 12:	XP_010913958.1	evm.model.jcf7180002768092.37	2e-36
111- 13:	XP_019710872.1	evm.model.jcf7180002768092.39	1e-46
## Alignment 112: score=282.0 e_value=1.1e-11 N=6 NC_025993.1&jcf7180002768482 plus
112- 0:	XP_010917617.1	evm.model.jcf7180002768482.6	1e-15
112- 1:	XP_010917589.1	evm.model.jcf7180002768482.8	7e-62
112- 2:	XP_019706303.1	evm.model.jcf7180002768482.9	4e-26
112- 3:	XP_010917562.1	evm.model.jcf7180002768482.10	2e-121
112- 4:	XP_010917546.1	evm.model.jcf7180002768482.12	0
112- 5:	XP_010920675.1	evm.model.jcf7180002768482.14	8e-25
## Alignment 113: score=989.0 e_value=1.9e-57 N=21 NC_025993.1&jcf7180002768579 plus
113- 0:	XP_010920655.1	evm.model.jcf7180002768579.2	0
113- 1:	XP_010920633.1	evm.model.jcf7180002768579.3	6e-79
113- 2:	XP_019703706.1	evm.model.jcf7180002768579.7	1e-166
113- 3:	XP_010920465.1	evm.model.jcf7180002768579.10	9e-83
113- 4:	XP_019704734.1	evm.model.jcf7180002768579.11	6e-54
113- 5:	XP_010920378.1	evm.model.jcf7180002768579.20	5e-30
113- 6:	XP_010920369.1	evm.model.jcf7180002768579.21	7e-72
113- 7:	XP_010920360.1	evm.model.jcf7180002768579.23	6e-31
113- 8:	XP_010920350.1	evm.model.jcf7180002768579.24	6e-13
113- 9:	XP_010920310.1	evm.model.jcf7180002768579.26	0
113- 10:	XP_019704744.1	evm.model.jcf7180002768579.31	3e-174
113- 11:	XP_010920210.1	evm.model.jcf7180002768579.33	3e-86
113- 12:	XP_010920938.1	evm.model.jcf7180002768579.34	7e-61
113- 13:	XP_019707893.1	evm.model.jcf7180002768579.35	5e-21
113- 14:	XP_010920176.1	evm.model.jcf7180002768579.36	5e-89
113- 15:	XP_010920155.1	evm.model.jcf7180002768579.39	4e-53
113- 16:	XP_010920116.1	evm.model.jcf7180002768579.41	0
113- 17:	XP_010920039.1	evm.model.jcf7180002768579.49	8e-44
113- 18:	XP_019708678.1	evm.model.jcf7180002768579.52	6e-148
113- 19:	XP_010919966.1	evm.model.jcf7180002768579.53	4e-109
113- 20:	XP_010919930.1	evm.model.jcf7180002768579.55	7e-132
## Alignment 114: score=354.0 e_value=2.5e-14 N=8 NC_025993.1&jcf7180002769153 minus
114- 0:	XP_010923204.1	evm.model.jcf7180002769153.24	0
114- 1:	XP_010922121.1	evm.model.jcf7180002769153.21	2e-159
114- 2:	XP_010921896.1	evm.model.jcf7180002769153.17	4e-170
114- 3:	XP_010921549.1	evm.model.jcf7180002769153.15	2e-15
114- 4:	XP_010920603.1	evm.model.jcf7180002769153.8	5e-08
114- 5:	XP_010920314.1	evm.model.jcf7180002769153.6	3e-95
114- 6:	XP_010920065.1	evm.model.jcf7180002769153.5	9e-130
114- 7:	XP_010918233.1	evm.model.jcf7180002769153.1	4e-53
## Alignment 115: score=255.0 e_value=2.8e-09 N=6 NC_025993.1&jcf7180002774386 minus
115- 0:	XP_010928571.1	evm.model.jcf7180002774386.37	3e-67
115- 1:	XP_010928462.1	evm.model.jcf7180002774386.33	0
115- 2:	XP_010928416.1	evm.model.jcf7180002774386.31	2e-99
115- 3:	XP_010928371.1	evm.model.jcf7180002774386.21	5e-74
115- 4:	XP_010928348.1	evm.model.jcf7180002774386.17	5e-90
115- 5:	XP_019704838.1	evm.model.jcf7180002774386.6	2e-117
## Alignment 116: score=692.0 e_value=7.5e-39 N=15 NC_025993.1&jcf7180002774769 minus
116- 0:	XP_010930456.1	evm.model.jcf7180002774769.86	4e-31
116- 1:	XP_010930404.1	evm.model.jcf7180002774769.71	4e-80
116- 2:	XP_010930250.1	evm.model.jcf7180002774769.54	0
116- 3:	XP_010930215.1	evm.model.jcf7180002774769.52	3e-124
116- 4:	XP_010930192.1	evm.model.jcf7180002774769.51	1e-156
116- 5:	XP_010930169.1	evm.model.jcf7180002774769.49	0
116- 6:	XP_010930157.1	evm.model.jcf7180002774769.43	3e-75
116- 7:	XP_010930135.1	evm.model.jcf7180002774769.36	0
116- 8:	XP_010930018.1	evm.model.jcf7180002774769.32	1e-18
116- 9:	XP_010930010.1	evm.model.jcf7180002774769.26	0
116- 10:	XP_010929868.1	evm.model.jcf7180002774769.14	9e-24
116- 11:	XP_010929843.1	evm.model.jcf7180002774769.13	3e-29
116- 12:	XP_010929829.1	evm.model.jcf7180002774769.6	8e-68
116- 13:	XP_019707813.1	evm.model.jcf7180002774769.5	4e-18
116- 14:	XP_010929797.1	evm.model.jcf7180002774769.3	1e-19
## Alignment 117: score=458.0 e_value=4e-20 N=10 NC_025993.1&jcf7180002779176 plus
117- 0:	XP_010914122.1	evm.model.jcf7180002779176.18	1e-150
117- 1:	XP_010914025.1	evm.model.jcf7180002779176.28	2e-119
117- 2:	XP_010913987.1	evm.model.jcf7180002779176.34	8e-170
117- 3:	XP_010913954.1	evm.model.jcf7180002779176.39	5e-72
117- 4:	XP_010913877.1	evm.model.jcf7180002779176.41	8e-132
117- 5:	XP_010913831.1	evm.model.jcf7180002779176.44	0
117- 6:	XP_010913806.1	evm.model.jcf7180002779176.46	9e-106
117- 7:	XP_010913688.1	evm.model.jcf7180002779176.62	0
117- 8:	XP_019710324.1	evm.model.jcf7180002779176.63	3e-54
117- 9:	XP_010913580.1	evm.model.jcf7180002779176.65	1e-137
## Alignment 118: score=1904.0 e_value=5.1e-140 N=41 NC_025993.1&jcf7180002779460 minus
118- 0:	XP_010919346.1	evm.model.jcf7180002779460.111	0
118- 1:	XP_019710198.1	evm.model.jcf7180002779460.106	0
118- 2:	XP_010919242.1	evm.model.jcf7180002779460.105	0
118- 3:	XP_010919192.1	evm.model.jcf7180002779460.101	2e-77
118- 4:	XP_019701597.1	evm.model.jcf7180002779460.100	2e-10
118- 5:	XP_010919146.1	evm.model.jcf7180002779460.97	2e-121
118- 6:	XP_010919004.1	evm.model.jcf7180002779460.92	5e-148
118- 7:	XP_010918996.1	evm.model.jcf7180002779460.91	1e-75
118- 8:	XP_010918971.1	evm.model.jcf7180002779460.90	2e-68
118- 9:	XP_010918952.2	evm.model.jcf7180002779460.87	2e-91
118- 10:	XP_010918939.1	evm.model.jcf7180002779460.85	3e-61
118- 11:	XP_010918908.1	evm.model.jcf7180002779460.82	4e-124
118- 12:	XP_010918871.1	evm.model.jcf7180002779460.78	0
118- 13:	XP_010918858.1	evm.model.jcf7180002779460.77	6e-16
118- 14:	XP_010918848.1	evm.model.jcf7180002779460.76	1e-92
118- 15:	XP_010926916.1	evm.model.jcf7180002779460.66	7e-128
118- 16:	XP_010926829.1	evm.model.jcf7180002779460.63	0
118- 17:	XP_010926761.1	evm.model.jcf7180002779460.62	2e-158
118- 18:	XP_010926715.1	evm.model.jcf7180002779460.61	1e-141
118- 19:	XP_010926697.1	evm.model.jcf7180002779460.59	5e-81
118- 20:	XP_010926684.1	evm.model.jcf7180002779460.58	0
118- 21:	XP_010926676.1	evm.model.jcf7180002779460.57	0
118- 22:	XP_010926663.1	evm.model.jcf7180002779460.56	6e-25
118- 23:	XP_010926643.1	evm.model.jcf7180002779460.51	0
118- 24:	XP_010926628.1	evm.model.jcf7180002779460.50	0
118- 25:	XP_010926480.1	evm.model.jcf7180002779460.49	0
118- 26:	XP_010926447.1	evm.model.jcf7180002779460.42	1e-50
118- 27:	XP_019706445.1	evm.model.jcf7180002779460.40	0
118- 28:	XP_010926397.1	evm.model.jcf7180002779460.35	0
118- 29:	XP_010926375.1	evm.model.jcf7180002779460.34	0
118- 30:	XP_010926244.1	evm.model.jcf7180002779460.32	9e-98
118- 31:	XP_010926226.1	evm.model.jcf7180002779460.30	3e-64
118- 32:	XP_010926172.1	evm.model.jcf7180002779460.28	2e-68
118- 33:	XP_010926147.1	evm.model.jcf7180002779460.26	5e-80
118- 34:	XP_010926141.1	evm.model.jcf7180002779460.25	0
118- 35:	XP_019706384.1	evm.model.jcf7180002779460.24	2e-21
118- 36:	XP_010926084.1	evm.model.jcf7180002779460.22	3e-33
118- 37:	XP_010927406.1	evm.model.jcf7180002779460.16	0
118- 38:	XP_019705455.1	evm.model.jcf7180002779460.13	2e-102
118- 39:	XP_019707761.1	evm.model.jcf7180002779460.6	1e-34
118- 40:	XP_010925945.1	evm.model.jcf7180002779460.5	2e-52
## Alignment 119: score=520.0 e_value=6.4e-26 N=12 NC_025993.1&jcf7180002779465 plus
119- 0:	XP_019701503.1	evm.model.jcf7180002779465.11	1e-169
119- 1:	XP_010925976.1	evm.model.jcf7180002779465.24	2e-60
119- 2:	XP_019707761.1	evm.model.jcf7180002779465.27	1e-30
119- 3:	XP_010925945.1	evm.model.jcf7180002779465.29	6e-79
119- 4:	XP_010925884.1	evm.model.jcf7180002779465.30	2e-106
119- 5:	XP_010925730.1	evm.model.jcf7180002779465.41	1e-155
119- 6:	XP_010925654.1	evm.model.jcf7180002779465.47	8e-44
119- 7:	XP_010925525.1	evm.model.jcf7180002779465.49	0
119- 8:	XP_010925444.1	evm.model.jcf7180002779465.59	2e-66
119- 9:	XP_010925356.1	evm.model.jcf7180002779465.63	6e-18
119- 10:	XP_010927265.1	evm.model.jcf7180002779465.66	2e-128
119- 11:	XP_010925337.1	evm.model.jcf7180002779465.67	1e-19
## Alignment 120: score=601.0 e_value=5.1e-30 N=13 NC_025993.1&jcf7180002780249 plus
120- 0:	XP_010927277.1	evm.model.jcf7180002780249.4	6e-104
120- 1:	XP_010927265.1	evm.model.jcf7180002780249.9	2e-156
120- 2:	XP_010925337.1	evm.model.jcf7180002780249.10	1e-128
120- 3:	XP_019706005.1	evm.model.jcf7180002780249.12	2e-42
120- 4:	XP_010925278.1	evm.model.jcf7180002780249.13	2e-150
120- 5:	XP_010925155.1	evm.model.jcf7180002780249.19	4e-78
120- 6:	XP_010925114.1	evm.model.jcf7180002780249.22	0
120- 7:	XP_010927245.1	evm.model.jcf7180002780249.24	0
120- 8:	XP_010925079.1	evm.model.jcf7180002780249.25	0
120- 9:	XP_010924974.1	evm.model.jcf7180002780249.30	8e-26
120- 10:	XP_010924933.1	evm.model.jcf7180002780249.32	0
120- 11:	XP_010924919.1	evm.model.jcf7180002780249.34	9e-83
120- 12:	XP_010924780.1	evm.model.jcf7180002780249.37	0
## Alignment 121: score=308.0 e_value=3.7e-12 N=7 NC_025993.1&jcf7180002780601 minus
121- 0:	XP_019701999.1	evm.model.jcf7180002780601.59	3e-66
121- 1:	XP_019705747.1	evm.model.jcf7180002780601.57	3e-22
121- 2:	XP_010906805.1	evm.model.jcf7180002780601.49	1e-95
121- 3:	XP_010906836.1	evm.model.jcf7180002780601.45	4e-17
121- 4:	XP_010906942.1	evm.model.jcf7180002780601.44	3e-86
121- 5:	XP_010906959.1	evm.model.jcf7180002780601.43	3e-24
121- 6:	XP_010907128.1	evm.model.jcf7180002780601.38	0
## Alignment 122: score=533.0 e_value=1.1e-22 N=11 NC_025993.1&jcf7180002780839 plus
122- 0:	XP_010939690.1	evm.model.jcf7180002780839.111	0
122- 1:	XP_010939714.1	evm.model.jcf7180002780839.112	6e-137
122- 2:	XP_010939726.1	evm.model.jcf7180002780839.114	8e-21
122- 3:	XP_019706896.1	evm.model.jcf7180002780839.117	2e-10
122- 4:	XP_010939754.1	evm.model.jcf7180002780839.119	0
122- 5:	XP_010939822.1	evm.model.jcf7180002780839.121	0
122- 6:	XP_010939834.1	evm.model.jcf7180002780839.124	7e-153
122- 7:	XP_019705766.1	evm.model.jcf7180002780839.126	3e-142
122- 8:	XP_010939889.1	evm.model.jcf7180002780839.128	5e-167
122- 9:	XP_010939929.1	evm.model.jcf7180002780839.129	0
122- 10:	XP_010939967.1	evm.model.jcf7180002780839.131	0
## Alignment 123: score=1750.0 e_value=3.4e-138 N=38 NC_025993.1&jcf7180002780839 minus
123- 0:	NP_001290521.1	evm.model.jcf7180002780839.241	9e-115
123- 1:	NP_001306843.1	evm.model.jcf7180002780839.237	1e-57
123- 2:	XP_019704319.1	evm.model.jcf7180002780839.234	2e-118
123- 3:	XP_010937862.2	evm.model.jcf7180002780839.232	5e-112
123- 4:	XP_010937850.1	evm.model.jcf7180002780839.231	0
123- 5:	XP_010937814.1	evm.model.jcf7180002780839.230	1e-63
123- 6:	XP_010937787.1	evm.model.jcf7180002780839.228	0
123- 7:	XP_010937798.1	evm.model.jcf7180002780839.227	7e-110
123- 8:	XP_010937770.1	evm.model.jcf7180002780839.224	1e-65
123- 9:	XP_019705063.1	evm.model.jcf7180002780839.222	0
123- 10:	XP_010937747.1	evm.model.jcf7180002780839.218	2e-81
123- 11:	XP_010937703.1	evm.model.jcf7180002780839.217	0
123- 12:	XP_010937645.1	evm.model.jcf7180002780839.216	1e-104
123- 13:	XP_010937633.1	evm.model.jcf7180002780839.213	0
123- 14:	XP_010937601.1	evm.model.jcf7180002780839.211	4e-137
123- 15:	XP_010937582.1	evm.model.jcf7180002780839.209	2e-85
123- 16:	XP_010939426.1	evm.model.jcf7180002780839.193	2e-125
123- 17:	XP_010939287.1	evm.model.jcf7180002780839.186	0
123- 18:	XP_010939263.1	evm.model.jcf7180002780839.184	2e-68
123- 19:	XP_010939171.1	evm.model.jcf7180002780839.182	0
123- 20:	XP_010939067.1	evm.model.jcf7180002780839.179	8e-60
123- 21:	XP_010939040.1	evm.model.jcf7180002780839.177	0
123- 22:	XP_010938971.1	evm.model.jcf7180002780839.173	9e-31
123- 23:	XP_010938921.1	evm.model.jcf7180002780839.171	7e-62
123- 24:	XP_010939498.2	evm.model.jcf7180002780839.170	4e-29
123- 25:	XP_010938832.1	evm.model.jcf7180002780839.169	1e-69
123- 26:	XP_010938815.1	evm.model.jcf7180002780839.167	2e-109
123- 27:	XP_010938795.1	evm.model.jcf7180002780839.166	4e-164
123- 28:	XP_010938751.1	evm.model.jcf7180002780839.162	1e-105
123- 29:	XP_010938730.1	evm.model.jcf7180002780839.160	0
123- 30:	XP_010939476.1	evm.model.jcf7180002780839.159	6e-10
123- 31:	XP_019709468.1	evm.model.jcf7180002780839.158	0
123- 32:	XP_010939642.1	evm.model.jcf7180002780839.142	0
123- 33:	XP_010939655.1	evm.model.jcf7180002780839.141	7e-174
123- 34:	XP_019707792.1	evm.model.jcf7180002780839.139	4e-42
123- 35:	XP_010939679.1	evm.model.jcf7180002780839.134	4e-56
123- 36:	XP_010939822.1	evm.model.jcf7180002780839.121	0
123- 37:	XP_010940003.1	evm.model.jcf7180002780839.106	0
## Alignment 124: score=508.0 e_value=1.3e-24 N=11 NC_025993.1&jcf7180002780847 plus
124- 0:	XP_010915232.1	evm.model.jcf7180002780847.3	8e-83
124- 1:	XP_010917300.2	evm.model.jcf7180002780847.11	0
124- 2:	XP_010915110.1	evm.model.jcf7180002780847.15	3e-118
124- 3:	XP_010914972.1	evm.model.jcf7180002780847.20	6e-85
124- 4:	XP_010914922.1	evm.model.jcf7180002780847.21	1e-39
124- 5:	XP_010914897.1	evm.model.jcf7180002780847.22	7e-41
124- 6:	XP_010914811.1	evm.model.jcf7180002780847.29	0
124- 7:	XP_010914798.1	evm.model.jcf7180002780847.30	5e-102
124- 8:	XP_010914749.1	evm.model.jcf7180002780847.45	0
124- 9:	XP_010914741.1	evm.model.jcf7180002780847.46	1e-22
124- 10:	XP_019705761.1	evm.model.jcf7180002780847.47	1e-07
## Alignment 125: score=327.0 e_value=3.3e-11 N=7 NC_025993.1&jcf7180002780878 minus
125- 0:	XP_010929118.1	evm.model.jcf7180002780878.53	8e-29
125- 1:	XP_010929025.1	evm.model.jcf7180002780878.50	2e-161
125- 2:	XP_010929012.1	evm.model.jcf7180002780878.49	5e-126
125- 3:	XP_010928965.1	evm.model.jcf7180002780878.47	7e-147
125- 4:	XP_010928957.1	evm.model.jcf7180002780878.46	4e-172
125- 5:	XP_010928945.1	evm.model.jcf7180002780878.41	3e-21
125- 6:	XP_010928845.1	evm.model.jcf7180002780878.36	9e-54
## Alignment 126: score=301.0 e_value=1.4e-11 N=7 NC_025993.1&jcf7180002780878 minus
126- 0:	XP_010933526.1	evm.model.jcf7180002780878.15	0
126- 1:	XP_010933610.2	evm.model.jcf7180002780878.12	7e-78
126- 2:	XP_010933798.1	evm.model.jcf7180002780878.9	0
126- 3:	XP_019703972.1	evm.model.jcf7180002780878.8	3e-116
126- 4:	XP_019705670.1	evm.model.jcf7180002780878.3	0
126- 5:	XP_010933997.1	evm.model.jcf7180002780878.2	5e-94
126- 6:	XP_010934011.1	evm.model.jcf7180002780878.1	2e-25
## Alignment 127: score=259.0 e_value=1.2e-09 N=6 NC_025993.1&jcf7180002780878 minus
127- 0:	XP_010929662.1	evm.model.jcf7180002780878.71	2e-50
127- 1:	XP_010929638.1	evm.model.jcf7180002780878.66	6e-118
127- 2:	XP_010929469.1	evm.model.jcf7180002780878.63	1e-44
127- 3:	XP_010931640.1	evm.model.jcf7180002780878.60	3e-23
127- 4:	XP_010929395.1	evm.model.jcf7180002780878.58	2e-106
127- 5:	XP_010929315.1	evm.model.jcf7180002780878.21	6e-20
## Alignment 128: score=418.0 e_value=6.2e-22 N=10 NC_025993.1&jcf7180002780885 plus
128- 0:	XP_019705397.1	evm.model.jcf7180002780885.9	5e-34
128- 1:	XP_010941741.1	evm.model.jcf7180002780885.10	0
128- 2:	XP_010941852.1	evm.model.jcf7180002780885.13	3e-53
128- 3:	XP_010941939.1	evm.model.jcf7180002780885.14	0
128- 4:	XP_010942340.1	evm.model.jcf7180002780885.22	2e-42
128- 5:	XP_010943602.1	evm.model.jcf7180002780885.25	0
128- 6:	XP_010943590.1	evm.model.jcf7180002780885.26	3e-93
128- 7:	XP_010943413.1	evm.model.jcf7180002780885.28	2e-83
128- 8:	XP_010943325.1	evm.model.jcf7180002780885.43	1e-15
128- 9:	XP_010943241.1	evm.model.jcf7180002780885.46	0
## Alignment 129: score=263.0 e_value=3.1e-09 N=6 NC_025993.1&jcf7180002780889 plus
129- 0:	XP_010921896.1	evm.model.jcf7180002780889.66	4e-90
129- 1:	XP_019708280.1	evm.model.jcf7180002780889.89	9e-49
129- 2:	XP_010919889.1	evm.model.jcf7180002780889.99	2e-54
129- 3:	XP_010919582.1	evm.model.jcf7180002780889.103	5e-27
129- 4:	XP_010918870.1	evm.model.jcf7180002780889.113	2e-155
129- 5:	XP_010918669.1	evm.model.jcf7180002780889.114	4e-171
## Alignment 130: score=1034.0 e_value=8.1e-68 N=23 NC_025993.1&jcf7180002780891 plus
130- 0:	XP_010928528.1	evm.model.jcf7180002780891.9	7e-21
130- 1:	XP_010928517.1	evm.model.jcf7180002780891.10	0
130- 2:	XP_010928486.1	evm.model.jcf7180002780891.12	1e-104
130- 3:	XP_010928474.1	evm.model.jcf7180002780891.13	1e-48
130- 4:	XP_010928462.1	evm.model.jcf7180002780891.14	0
130- 5:	XP_010928371.1	evm.model.jcf7180002780891.16	2e-74
130- 6:	XP_019703573.1	evm.model.jcf7180002780891.19	1e-112
130- 7:	XP_019704845.1	evm.model.jcf7180002780891.20	1e-176
130- 8:	XP_019707416.1	evm.model.jcf7180002780891.26	6e-41
130- 9:	XP_010932101.1	evm.model.jcf7180002780891.27	3e-83
130- 10:	XP_010932063.1	evm.model.jcf7180002780891.28	1e-106
130- 11:	XP_010931238.1	evm.model.jcf7180002780891.29	0
130- 12:	XP_010931233.1	evm.model.jcf7180002780891.31	6e-74
130- 13:	XP_010932028.1	evm.model.jcf7180002780891.36	1e-42
130- 14:	XP_019706618.1	evm.model.jcf7180002780891.40	4e-167
130- 15:	XP_010931141.1	evm.model.jcf7180002780891.43	7e-27
130- 16:	XP_010931130.1	evm.model.jcf7180002780891.44	1e-139
130- 17:	XP_010930963.1	evm.model.jcf7180002780891.46	7e-74
130- 18:	XP_019707319.1	evm.model.jcf7180002780891.50	5e-34
130- 19:	XP_010930815.1	evm.model.jcf7180002780891.59	2e-141
130- 20:	XP_010930685.1	evm.model.jcf7180002780891.62	5e-37
130- 21:	XP_010931877.1	evm.model.jcf7180002780891.63	7e-167
130- 22:	XP_010930568.2	evm.model.jcf7180002780891.66	3e-90
## Alignment 131: score=361.0 e_value=1.6e-14 N=8 NC_025993.1&jcf7180002780893 minus
131- 0:	XP_010920378.1	evm.model.jcf7180002780893.94	6e-89
131- 1:	XP_010920339.1	evm.model.jcf7180002780893.91	0
131- 2:	XP_019707244.1	evm.model.jcf7180002780893.79	2e-114
131- 3:	XP_019704744.1	evm.model.jcf7180002780893.76	0
131- 4:	XP_010920194.2	evm.model.jcf7180002780893.71	3e-111
131- 5:	XP_010920938.1	evm.model.jcf7180002780893.70	1e-70
131- 6:	XP_010920128.1	evm.model.jcf7180002780893.65	0
131- 7:	XP_010919930.1	evm.model.jcf7180002780893.43	3e-120
## Alignment 132: score=332.0 e_value=1.1e-11 N=7 NC_025993.1&jcf7180002780897 minus
132- 0:	XP_010924035.1	evm.model.jcf7180002780897.37	1e-43
132- 1:	XP_010924001.1	evm.model.jcf7180002780897.36	0
132- 2:	XP_010923907.1	evm.model.jcf7180002780897.33	9e-102
132- 3:	XP_010923876.1	evm.model.jcf7180002780897.31	2e-59
132- 4:	XP_010923865.1	evm.model.jcf7180002780897.30	4e-129
132- 5:	XP_010923802.1	evm.model.jcf7180002780897.25	2e-125
132- 6:	XP_010923782.1	evm.model.jcf7180002780897.23	9e-17
## Alignment 133: score=526.0 e_value=0 N=13 NC_025993.1&jcf7180002781122 plus
133- 0:	XP_010934367.1	evm.model.jcf7180002781122.2	2e-43
133- 1:	XP_010934504.1	evm.model.jcf7180002781122.7	4e-84
133- 2:	XP_010934691.1	evm.model.jcf7180002781122.17	5e-116
133- 3:	XP_010934954.1	evm.model.jcf7180002781122.25	3e-151
133- 4:	XP_010935178.1	evm.model.jcf7180002781122.40	1e-130
133- 5:	XP_010935205.1	evm.model.jcf7180002781122.41	0
133- 6:	XP_010937193.1	evm.model.jcf7180002781122.42	1e-148
133- 7:	XP_010937182.1	evm.model.jcf7180002781122.46	7e-81
133- 8:	XP_019706780.1	evm.model.jcf7180002781122.48	8e-100
133- 9:	XP_010937083.1	evm.model.jcf7180002781122.54	3e-179
133- 10:	XP_010937073.1	evm.model.jcf7180002781122.62	4e-178
133- 11:	XP_010936910.1	evm.model.jcf7180002781122.92	1e-08
133- 12:	XP_019708989.1	evm.model.jcf7180002781122.93	1e-167
## Alignment 134: score=290.0 e_value=3.8e-09 N=6 NC_025993.1&jcf7180002781123 minus
134- 0:	XP_019703862.1	evm.model.jcf7180002781123.82	3e-29
134- 1:	XP_010933388.1	evm.model.jcf7180002781123.79	2e-49
134- 2:	XP_010933399.1	evm.model.jcf7180002781123.78	3e-53
134- 3:	XP_010933423.1	evm.model.jcf7180002781123.69	0
134- 4:	XP_010933434.1	evm.model.jcf7180002781123.68	2e-107
134- 5:	XP_010933466.1	evm.model.jcf7180002781123.62	2e-27
## Alignment 135: score=585.0 e_value=5.2e-31 N=13 NC_025993.1&jcf7180002781131 plus
135- 0:	XP_010927097.1	evm.model.jcf7180002781131.43	7e-180
135- 1:	XP_010922495.1	evm.model.jcf7180002781131.88	3e-126
135- 2:	XP_010922469.1	evm.model.jcf7180002781131.91	0
135- 3:	XP_010922419.1	evm.model.jcf7180002781131.92	3
135- 4:	XP_010922404.1	evm.model.jcf7180002781131.94	0
135- 5:	XP_010922331.1	evm.model.jcf7180002781131.100	9e-167
135- 6:	XP_010927064.2	evm.model.jcf7180002781131.102	2e-66
135- 7:	XP_010927048.1	evm.model.jcf7180002781131.108	7e-102
135- 8:	XP_010922003.1	evm.model.jcf7180002781131.114	7e-33
135- 9:	XP_010921990.1	evm.model.jcf7180002781131.119	7e-101
135- 10:	XP_010921927.1	evm.model.jcf7180002781131.123	0
135- 11:	XP_010927032.1	evm.model.jcf7180002781131.124	5e-146
135- 12:	XP_010921914.1	evm.model.jcf7180002781131.126	2e-39
## Alignment 136: score=292.0 e_value=1e-08 N=6 NC_025993.1&jcf7180002781131 plus
136- 0:	XP_019707917.1	evm.model.jcf7180002781131.148	5e-80
136- 1:	XP_010921543.1	evm.model.jcf7180002781131.155	5e-91
136- 2:	XP_010921513.1	evm.model.jcf7180002781131.163	2e-50
136- 3:	XP_019708037.1	evm.model.jcf7180002781131.165	5e-07
136- 4:	XP_010921493.1	evm.model.jcf7180002781131.175	4e-21
136- 5:	XP_010921476.1	evm.model.jcf7180002781131.178	7e-40
## Alignment 137: score=465.0 e_value=0 N=10 NC_025993.1&jcf7180002781327 plus
137- 0:	XP_019704431.1	evm.model.jcf7180002781327.296	1e-06
137- 1:	XP_010904861.1	evm.model.jcf7180002781327.298	3e-87
137- 2:	XP_010904895.2	evm.model.jcf7180002781327.306	0
137- 3:	XP_010904945.1	evm.model.jcf7180002781327.309	0
137- 4:	XP_019709447.1	evm.model.jcf7180002781327.315	3e-176
137- 5:	XP_019709452.1	evm.model.jcf7180002781327.317	4e-155
137- 6:	XP_010905089.1	evm.model.jcf7180002781327.318	2e-158
137- 7:	XP_010905110.1	evm.model.jcf7180002781327.319	4e-119
137- 8:	XP_010905168.1	evm.model.jcf7180002781327.321	6e-68
137- 9:	XP_010905183.1	evm.model.jcf7180002781327.322	1e-151
## Alignment 138: score=320.0 e_value=5.6e-12 N=7 NC_025993.1&jcf7180002781361 minus
138- 0:	XP_010939209.1	evm.model.jcf7180002781361.201	4e-159
138- 1:	XP_010939579.1	evm.model.jcf7180002781361.198	0
138- 2:	XP_010940202.1	evm.model.jcf7180002781361.169	1e-131
138- 3:	XP_019701972.1	evm.model.jcf7180002781361.168	2e-111
138- 4:	XP_010941878.1	evm.model.jcf7180002781361.140	6e-54
138- 5:	XP_010942001.1	evm.model.jcf7180002781361.128	6e-38
138- 6:	XP_010942875.1	evm.model.jcf7180002781361.111	0
## Alignment 139: score=378.0 e_value=1.1e-14 N=8 NC_025993.1&jcf7180002781550 plus
139- 0:	XP_010930135.1	evm.model.jcf7180002781550.17	0
139- 1:	XP_010930018.1	evm.model.jcf7180002781550.20	6e-16
139- 2:	XP_010930010.1	evm.model.jcf7180002781550.22	0
139- 3:	XP_010929998.1	evm.model.jcf7180002781550.25	1e-54
139- 4:	XP_010931742.1	evm.model.jcf7180002781550.32	0
139- 5:	XP_019701278.1	evm.model.jcf7180002781550.34	4e-92
139- 6:	XP_010929942.1	evm.model.jcf7180002781550.35	0
139- 7:	XP_010929868.1	evm.model.jcf7180002781550.41	3e-25
## Alignment 140: score=576.0 e_value=5.1e-31 N=13 NC_025993.1&jcf7180002781606 minus
140- 0:	XP_010932533.1	evm.model.jcf7180002781606.161	4e-13
140- 1:	XP_010932555.1	evm.model.jcf7180002781606.158	0
140- 2:	XP_010932651.1	evm.model.jcf7180002781606.157	3e-139
140- 3:	XP_010932730.1	evm.model.jcf7180002781606.156	6e-93
140- 4:	XP_010932844.1	evm.model.jcf7180002781606.155	0
140- 5:	XP_019706739.1	evm.model.jcf7180002781606.154	5e-12
140- 6:	XP_010933021.1	evm.model.jcf7180002781606.152	5e-77
140- 7:	XP_010933050.2	evm.model.jcf7180002781606.151	2
140- 8:	XP_010933163.1	evm.model.jcf7180002781606.149	8e-76
140- 9:	XP_010933194.1	evm.model.jcf7180002781606.146	2e-31
140- 10:	XP_010933349.1	evm.model.jcf7180002781606.144	7e-154
140- 11:	XP_010933388.1	evm.model.jcf7180002781606.143	1e-29
140- 12:	XP_010933399.1	evm.model.jcf7180002781606.141	4e-169
## Alignment 141: score=273.0 e_value=2.5e-11 N=6 NC_025993.1&jcf7180002781608 plus
141- 0:	XP_010930674.1	evm.model.jcf7180002781608.68	0
141- 1:	XP_010930664.1	evm.model.jcf7180002781608.72	0
141- 2:	XP_010930651.1	evm.model.jcf7180002781608.73	2e-70
141- 3:	XP_010930641.1	evm.model.jcf7180002781608.75	0
141- 4:	XP_010930377.1	evm.model.jcf7180002781608.90	1e-55
141- 5:	XP_010930271.1	evm.model.jcf7180002781608.95	1e-30
## Alignment 142: score=806.0 e_value=7.4e-54 N=18 NC_025993.1&jcf7180002781633 plus
142- 0:	XP_010934842.1	evm.model.jcf7180002781633.171	0.0006
142- 1:	XP_010935005.1	evm.model.jcf7180002781633.220	5e-108
142- 2:	XP_010935017.1	evm.model.jcf7180002781633.221	0
142- 3:	XP_010935059.1	evm.model.jcf7180002781633.228	0
142- 4:	XP_010935193.1	evm.model.jcf7180002781633.230	8e-42
142- 5:	XP_010935205.1	evm.model.jcf7180002781633.239	5e-179
142- 6:	XP_010937268.1	evm.model.jcf7180002781633.244	0
142- 7:	XP_010937215.1	evm.model.jcf7180002781633.246	6e-160
142- 8:	XP_010937182.1	evm.model.jcf7180002781633.248	1e-100
142- 9:	XP_010937172.1	evm.model.jcf7180002781633.249	0
142- 10:	XP_010937096.1	evm.model.jcf7180002781633.251	1e-87
142- 11:	XP_010937028.1	evm.model.jcf7180002781633.252	2e-68
142- 12:	XP_010936982.1	evm.model.jcf7180002781633.260	0
142- 13:	XP_010936949.1	evm.model.jcf7180002781633.262	3e-67
142- 14:	XP_010936931.1	evm.model.jcf7180002781633.264	0
142- 15:	XP_010936784.1	evm.model.jcf7180002781633.272	2e-08
142- 16:	XP_010936755.1	evm.model.jcf7180002781633.273	0
142- 17:	XP_010936734.2	evm.model.jcf7180002781633.274	6e-44
## Alignment 143: score=434.0 e_value=1.9e-21 N=10 NC_025993.1&jcf7180002781636 minus
143- 0:	NP_001290521.1	evm.model.jcf7180002781636.64	2e-90
143- 1:	XP_010937936.1	evm.model.jcf7180002781636.52	1e-49
143- 2:	XP_010937850.1	evm.model.jcf7180002781636.48	0
143- 3:	XP_010937798.1	evm.model.jcf7180002781636.47	9e-119
143- 4:	XP_019705063.1	evm.model.jcf7180002781636.44	0
143- 5:	XP_010937671.1	evm.model.jcf7180002781636.37	3e-172
143- 6:	XP_010937582.1	evm.model.jcf7180002781636.35	5e-41
143- 7:	XP_010939426.1	evm.model.jcf7180002781636.7	3e-109
143- 8:	XP_010939390.1	evm.model.jcf7180002781636.6	2e-10
143- 9:	XP_019708628.1	evm.model.jcf7180002781636.1	0.0008
## Alignment 144: score=863.0 e_value=6.7e-56 N=20 NC_025993.1&jcf7180002781638 plus
144- 0:	XP_010930368.1	evm.model.jcf7180002781638.2	4e-106
144- 1:	XP_010931042.1	evm.model.jcf7180002781638.4	2e-23
144- 2:	XP_010912878.1	evm.model.jcf7180002781638.6	0
144- 3:	XP_019703587.1	evm.model.jcf7180002781638.7	1e-92
144- 4:	XP_019709102.1	evm.model.jcf7180002781638.10	0
144- 5:	XP_010932181.1	evm.model.jcf7180002781638.13	0
144- 6:	XP_010912889.1	evm.model.jcf7180002781638.14	4e-51
144- 7:	XP_010934030.1	evm.model.jcf7180002781638.18	0
144- 8:	XP_010934971.1	evm.model.jcf7180002781638.22	9e-16
144- 9:	XP_010935166.1	evm.model.jcf7180002781638.23	3e-94
144- 10:	XP_010937857.1	evm.model.jcf7180002781638.25	5e-120
144- 11:	XP_010937974.1	evm.model.jcf7180002781638.26	3e-85
144- 12:	XP_010939771.1	evm.model.jcf7180002781638.27	2e-70
144- 13:	XP_010941013.1	evm.model.jcf7180002781638.28	3e-23
144- 14:	XP_010942001.1	evm.model.jcf7180002781638.31	3e-46
144- 15:	XP_010942140.1	evm.model.jcf7180002781638.32	2e-21
144- 16:	XP_010943628.1	evm.model.jcf7180002781638.37	1e-159
144- 17:	XP_010943806.1	evm.model.jcf7180002781638.38	2e-15
144- 18:	XP_010904950.1	evm.model.jcf7180002781638.43	0
144- 19:	XP_019707609.1	evm.model.jcf7180002781638.47	2e-21
## Alignment 145: score=401.0 e_value=6.4e-16 N=9 NC_025993.1&jcf7180002781638 plus
145- 0:	XP_010907721.2	evm.model.jcf7180002781638.49	5e-117
145- 1:	XP_010908684.1	evm.model.jcf7180002781638.55	2e-162
145- 2:	XP_010908963.1	evm.model.jcf7180002781638.56	8e-91
145- 3:	XP_010910098.1	evm.model.jcf7180002781638.61	1e-77
145- 4:	XP_019707219.1	evm.model.jcf7180002781638.63	6e-58
145- 5:	XP_010910835.1	evm.model.jcf7180002781638.67	5e-127
145- 6:	XP_010911329.1	evm.model.jcf7180002781638.73	1e-154
145- 7:	XP_010911968.1	evm.model.jcf7180002781638.76	4e-170
145- 8:	XP_010911987.1	evm.model.jcf7180002781638.78	7e-110
## Alignment 146: score=343.0 e_value=4.9e-15 N=8 NC_025993.1&jcf7180002781638 minus
146- 0:	XP_019709277.1	evm.model.jcf7180002781638.103	0
146- 1:	XP_010914859.1	evm.model.jcf7180002781638.101	1e-123
146- 2:	XP_010914845.1	evm.model.jcf7180002781638.98	2e-113
146- 3:	XP_010914824.1	evm.model.jcf7180002781638.97	0
146- 4:	XP_010918640.1	evm.model.jcf7180002781638.92	1e-66
146- 5:	XP_010918620.1	evm.model.jcf7180002781638.91	1e-110
146- 6:	XP_010918508.1	evm.model.jcf7180002781638.85	2e-80
146- 7:	XP_010918418.1	evm.model.jcf7180002781638.81	0
## Alignment 147: score=307.0 e_value=1.2e-10 N=7 NC_025993.1&jcf7180002781638 minus
147- 0:	XP_010916151.1	evm.model.jcf7180002781638.136	0
147- 1:	XP_010916059.1	evm.model.jcf7180002781638.125	0
147- 2:	XP_010915985.1	evm.model.jcf7180002781638.123	2e-101
147- 3:	XP_010915914.2	evm.model.jcf7180002781638.119	0
147- 4:	XP_010915862.1	evm.model.jcf7180002781638.117	2e-92
147- 5:	XP_010915718.2	evm.model.jcf7180002781638.115	9e-30
147- 6:	XP_019709796.1	evm.model.jcf7180002781638.107	0
## Alignment 148: score=920.0 e_value=6e-60 N=21 NC_025993.1&jcf7180002781639 plus
148- 0:	XP_010921576.1	evm.model.jcf7180002781639.59	0
148- 1:	XP_010917209.1	evm.model.jcf7180002781639.61	9e-45
148- 2:	XP_010911328.1	evm.model.jcf7180002781639.62	3e-38
148- 3:	XP_010927016.1	evm.model.jcf7180002781639.64	0
148- 4:	XP_010927480.1	evm.model.jcf7180002781639.65	1e-39
148- 5:	NP_001291356.1	evm.model.jcf7180002781639.67	1e-50
148- 6:	XP_010927763.1	evm.model.jcf7180002781639.69	0
148- 7:	XP_010928202.1	evm.model.jcf7180002781639.71	4e-63
148- 8:	XP_010930368.1	evm.model.jcf7180002781639.72	1e-109
148- 9:	XP_010912872.1	evm.model.jcf7180002781639.73	0
148- 10:	XP_010912878.1	evm.model.jcf7180002781639.75	3e-99
148- 11:	XP_019709102.1	evm.model.jcf7180002781639.78	0
148- 12:	XP_010932181.1	evm.model.jcf7180002781639.81	1e-119
148- 13:	XP_010912889.1	evm.model.jcf7180002781639.82	3e-69
148- 14:	XP_010932889.1	evm.model.jcf7180002781639.85	1e-38
148- 15:	XP_010912920.1	evm.model.jcf7180002781639.88	0
148- 16:	XP_010934971.1	evm.model.jcf7180002781639.91	1e-177
148- 17:	XP_010935166.1	evm.model.jcf7180002781639.92	4e-110
148- 18:	XP_010935281.1	evm.model.jcf7180002781639.95	4e-36
148- 19:	XP_010936661.1	evm.model.jcf7180002781639.99	0
148- 20:	XP_010937974.1	evm.model.jcf7180002781639.103	0
## Alignment 149: score=808.0 e_value=6.7e-42 N=17 NC_025993.1&jcf7180002781639 plus
149- 0:	XP_010907721.2	evm.model.jcf7180002781639.128	2e-58
149- 1:	XP_010908684.1	evm.model.jcf7180002781639.132	0
149- 2:	XP_010908963.1	evm.model.jcf7180002781639.133	5e-15
149- 3:	XP_010909190.1	evm.model.jcf7180002781639.135	0
149- 4:	XP_010909465.1	evm.model.jcf7180002781639.136	2e-29
149- 5:	XP_010909643.1	evm.model.jcf7180002781639.138	0
149- 6:	XP_010909939.1	evm.model.jcf7180002781639.139	0
149- 7:	XP_010910098.1	evm.model.jcf7180002781639.141	1e-124
149- 8:	XP_019707219.1	evm.model.jcf7180002781639.144	2e-67
149- 9:	XP_010910484.1	evm.model.jcf7180002781639.145	5e-23
149- 10:	XP_010910835.1	evm.model.jcf7180002781639.149	2e-126
149- 11:	XP_010911067.1	evm.model.jcf7180002781639.152	2e-10
149- 12:	XP_010911329.1	evm.model.jcf7180002781639.156	2e-77
149- 13:	XP_019709153.1	evm.model.jcf7180002781639.158	8e-37
149- 14:	XP_010911850.1	evm.model.jcf7180002781639.159	0
149- 15:	XP_010911931.1	evm.model.jcf7180002781639.160	7e-86
149- 16:	XP_010911987.1	evm.model.jcf7180002781639.161	3e-44
## Alignment 150: score=553.0 e_value=5e-31 N=13 NC_025993.1&jcf7180002781639 plus
150- 0:	XP_010922298.1	evm.model.jcf7180002781639.5	2e-84
150- 1:	XP_010920065.1	evm.model.jcf7180002781639.10	3e-72
150- 2:	XP_010918669.1	evm.model.jcf7180002781639.16	0
150- 3:	XP_010917315.1	evm.model.jcf7180002781639.21	2e-135
150- 4:	XP_010916538.1	evm.model.jcf7180002781639.35	0
150- 5:	XP_019708972.1	evm.model.jcf7180002781639.37	0
[truncated: 21,217 more rows]

## Sheet: Ananas vs Trichopus
Table S9B. Collinear genes between A. comosus and T. zeylanicus
############### Parameters ###############
# MATCH_SCORE: 50
# MATCH_SIZE: 5
# GAP_PENALTY: -1
# OVERLAP_WINDOW: 5
# E_VALUE: 1e-05
# MAX GAPS: 25
############### Statistics ###############
# Number of collinear genes: 17640, Percentage: 26.54
# Number of all genes: 66472
##########################################
## Alignment 0: score=388.0 e_value=0 N=9 NC_033621.1&jcf7180002712448 plus
0- 0:	XP_020090790.1	evm.model.jcf7180002712448.21	2e-23
0- 1:	XP_020102667.1	evm.model.jcf7180002712448.27	1e-139
0- 2:	XP_020102432.1	evm.model.jcf7180002712448.30	3e-44
0- 3:	XP_020093682.1	evm.model.jcf7180002712448.39	9e-40
0- 4:	XP_020082954.1	evm.model.jcf7180002712448.62	4e-96
0- 5:	XP_020082964.1	evm.model.jcf7180002712448.63	9e-54
0- 6:	XP_020090349.1	evm.model.jcf7180002712448.74	6e-160
0- 7:	XP_020103594.1	evm.model.jcf7180002712448.81	0
0- 8:	XP_020103607.1	evm.model.jcf7180002712448.82	2e-61
## Alignment 1: score=301.0 e_value=6e-11 N=7 NC_033621.1&jcf7180002737628 plus
1- 0:	XP_020093214.1	evm.model.jcf7180002737628.90	4e-59
1- 1:	XP_020101252.1	evm.model.jcf7180002737628.91	3e-29
1- 2:	XP_020113201.1	evm.model.jcf7180002737628.106	5e-23
1- 3:	XP_020106076.1	evm.model.jcf7180002737628.123	2e-129
1- 4:	XP_020093649.1	evm.model.jcf7180002737628.144	0
1- 5:	XP_020090490.1	evm.model.jcf7180002737628.147	0
1- 6:	XP_020091843.1	evm.model.jcf7180002737628.160	3e-33
## Alignment 2: score=280.0 e_value=2.7e-12 N=7 NC_033621.1&jcf7180002757815 plus
2- 0:	XP_020098839.1	evm.model.jcf7180002757815.16	3e-17
2- 1:	XP_020094901.1	evm.model.jcf7180002757815.18	2e-164
2- 2:	XP_020094429.1	evm.model.jcf7180002757815.19	3e-151
2- 3:	XP_020101928.1	evm.model.jcf7180002757815.23	6e-83
2- 4:	XP_020089777.1	evm.model.jcf7180002757815.24	7e-67
2- 5:	XP_020097611.1	evm.model.jcf7180002757815.42	1e-86
2- 6:	XP_020097981.1	evm.model.jcf7180002757815.46	2e-97
## Alignment 3: score=493.0 e_value=8.1e-25 N=11 NC_033621.1&jcf7180002757825 plus
3- 0:	XP_020093975.1	evm.model.jcf7180002757825.140	4e-142
3- 1:	XP_020094798.1	evm.model.jcf7180002757825.148	2e-28
3- 2:	XP_020084007.1	evm.model.jcf7180002757825.152	0
3- 3:	XP_020084773.1	evm.model.jcf7180002757825.157	8e-23
3- 4:	XP_020091725.1	evm.model.jcf7180002757825.163	0
3- 5:	XP_020106380.1	evm.model.jcf7180002757825.164	8e-52
3- 6:	XP_020081725.1	evm.model.jcf7180002757825.165	4e-39
3- 7:	XP_020091135.1	evm.model.jcf7180002757825.174	1e-156
3- 8:	XP_020091142.1	evm.model.jcf7180002757825.176	8e-42
3- 9:	XP_020093124.1	evm.model.jcf7180002757825.193	0
3- 10:	XP_020091127.1	evm.model.jcf7180002757825.200	6e-66
## Alignment 4: score=265.0 e_value=7.9e-08 N=6 NC_033621.1&jcf7180002757825 minus
4- 0:	XP_020090585.1	evm.model.jcf7180002757825.197	5e-104
4- 1:	XP_020098777.1	evm.model.jcf7180002757825.192	0
4- 2:	XP_020095082.1	evm.model.jcf7180002757825.182	0
4- 3:	XP_020106065.1	evm.model.jcf7180002757825.169	0
4- 4:	XP_020100537.1	evm.model.jcf7180002757825.156	1e-46
4- 5:	XP_020099901.1	evm.model.jcf7180002757825.148	2e-25
## Alignment 5: score=439.0 e_value=5.2e-22 N=10 NC_033621.1&jcf7180002757847 plus
5- 0:	XP_020099609.1	evm.model.jcf7180002757847.9	3e-80
5- 1:	XP_020098209.1	evm.model.jcf7180002757847.10	0
5- 2:	XP_020102776.1	evm.model.jcf7180002757847.15	0
5- 3:	XP_020093549.1	evm.model.jcf7180002757847.28	3e-162
5- 4:	XP_020091762.1	evm.model.jcf7180002757847.31	0
5- 5:	XP_020083136.1	evm.model.jcf7180002757847.39	3e-08
5- 6:	XP_020082346.1	evm.model.jcf7180002757847.51	2e-23
5- 7:	XP_020095440.1	evm.model.jcf7180002757847.52	0
5- 8:	XP_020105894.1	evm.model.jcf7180002757847.57	6e-165
5- 9:	XP_020084393.1	evm.model.jcf7180002757847.60	2e-109
## Alignment 6: score=259.0 e_value=1.5e-11 N=7 NC_033621.1&jcf7180002757849 minus
6- 0:	XP_020095967.1	evm.model.jcf7180002757849.73	0
6- 1:	XP_020092380.1	evm.model.jcf7180002757849.53	6e-27
6- 2:	XP_020097984.1	evm.model.jcf7180002757849.43	2e-53
6- 3:	XP_020083213.1	evm.model.jcf7180002757849.38	6e-13
6- 4:	XP_020083116.1	evm.model.jcf7180002757849.37	3e-108
6- 5:	XP_020099362.1	evm.model.jcf7180002757849.23	4e-15
6- 6:	XP_020097611.1	evm.model.jcf7180002757849.1	1e-126
## Alignment 7: score=531.0 e_value=4.5e-25 N=11 NC_033621.1&jcf7180002757872 minus
7- 0:	XP_020093159.1	evm.model.jcf7180002757872.49	0
7- 1:	XP_020094943.1	evm.model.jcf7180002757872.47	1e-96
7- 2:	XP_020085376.1	evm.model.jcf7180002757872.46	2e-40
7- 3:	XP_020104396.1	evm.model.jcf7180002757872.42	7e-107
7- 4:	XP_020088974.1	evm.model.jcf7180002757872.36	1e-34
7- 5:	XP_020096838.1	evm.model.jcf7180002757872.35	0
7- 6:	XP_020104955.1	evm.model.jcf7180002757872.28	5e-116
7- 7:	XP_020099843.1	evm.model.jcf7180002757872.25	2e-127
7- 8:	XP_020095772.1	evm.model.jcf7180002757872.24	4e-63
7- 9:	XP_020096859.1	evm.model.jcf7180002757872.8	0
7- 10:	XP_020096164.1	evm.model.jcf7180002757872.7	3e-14
## Alignment 8: score=452.0 e_value=3.8e-19 N=10 NC_033621.1&jcf7180002757893 minus
8- 0:	XP_020089974.1	evm.model.jcf7180002757893.130	0
8- 1:	XP_020098598.1	evm.model.jcf7180002757893.125	1e-69
8- 2:	XP_020094586.1	evm.model.jcf7180002757893.119	4e-96
8- 3:	XP_020103799.1	evm.model.jcf7180002757893.105	2e-82
8- 4:	XP_020085277.1	evm.model.jcf7180002757893.99	2e-143
8- 5:	XP_020102993.1	evm.model.jcf7180002757893.97	6e-56
8- 6:	XP_020087483.1	evm.model.jcf7180002757893.89	9e-85
8- 7:	XP_020106013.1	evm.model.jcf7180002757893.78	2e-115
8- 8:	XP_020090902.1	evm.model.jcf7180002757893.75	0
8- 9:	XP_020085107.1	evm.model.jcf7180002757893.69	2e-64
## Alignment 9: score=329.0 e_value=2.5e-12 N=7 NC_033621.1&jcf7180002757968 minus
9- 0:	XP_020097393.1	evm.model.jcf7180002757968.108	1e-166
9- 1:	XP_020094475.1	evm.model.jcf7180002757968.104	2e-14
9- 2:	XP_020100361.1	evm.model.jcf7180002757968.82	2e-67
9- 3:	XP_020100078.1	evm.model.jcf7180002757968.73	3e-176
9- 4:	XP_020088146.1	evm.model.jcf7180002757968.70	3e-72
9- 5:	XP_020095073.1	evm.model.jcf7180002757968.68	0
9- 6:	XP_020105434.1	evm.model.jcf7180002757968.50	2e-29
## Alignment 10: score=280.0 e_value=1.2e-08 N=6 NC_033621.1&jcf7180002758268 plus
10- 0:	XP_020095772.1	evm.model.jcf7180002758268.11	8e-80
10- 1:	XP_020096859.1	evm.model.jcf7180002758268.15	0
10- 2:	XP_020096164.1	evm.model.jcf7180002758268.18	2e-18
10- 3:	XP_020085918.1	evm.model.jcf7180002758268.21	0
10- 4:	XP_020084359.1	evm.model.jcf7180002758268.38	0
10- 5:	XP_020095939.1	evm.model.jcf7180002758268.43	7e-85
## Alignment 11: score=1239.0 e_value=1.3e-83 N=27 NC_033621.1&jcf7180002759578 plus
11- 0:	XP_020092009.1	evm.model.jcf7180002759578.112	3e-107
11- 1:	XP_020089094.1	evm.model.jcf7180002759578.116	0
11- 2:	XP_020088256.1	evm.model.jcf7180002759578.117	0
11- 3:	XP_020103041.1	evm.model.jcf7180002759578.127	1e-07
11- 4:	XP_020100735.1	evm.model.jcf7180002759578.131	2e-149
11- 5:	XP_020103672.1	evm.model.jcf7180002759578.137	0.3
11- 6:	XP_020092460.1	evm.model.jcf7180002759578.139	1e-179
11- 7:	XP_020100314.1	evm.model.jcf7180002759578.149	3e-145
11- 8:	XP_020083554.1	evm.model.jcf7180002759578.156	0
11- 9:	XP_020083885.1	evm.model.jcf7180002759578.168	0
11- 10:	XP_020086101.1	evm.model.jcf7180002759578.172	3e-31
11- 11:	XP_020096956.1	evm.model.jcf7180002759578.176	4e-147
11- 12:	XP_020086827.1	evm.model.jcf7180002759578.185	5e-80
11- 13:	XP_020103837.1	evm.model.jcf7180002759578.200	0
11- 14:	XP_020091578.1	evm.model.jcf7180002759578.216	2e-77
11- 15:	XP_020083479.1	evm.model.jcf7180002759578.232	1e-39
11- 16:	XP_020095835.1	evm.model.jcf7180002759578.235	9e-157
11- 17:	XP_020083891.1	evm.model.jcf7180002759578.244	1e-118
11- 18:	XP_020083777.1	evm.model.jcf7180002759578.250	7e-67
11- 19:	XP_020092694.1	evm.model.jcf7180002759578.252	1e-15
11- 20:	XP_020084068.1	evm.model.jcf7180002759578.255	8e-111
11- 21:	XP_020097762.1	evm.model.jcf7180002759578.260	3e-98
11- 22:	XP_020089157.1	evm.model.jcf7180002759578.272	5e-173
11- 23:	XP_020093120.1	evm.model.jcf7180002759578.279	0
11- 24:	XP_020093238.1	evm.model.jcf7180002759578.280	5e-45
11- 25:	XP_020093342.1	evm.model.jcf7180002759578.282	2e-28
11- 26:	XP_020093456.1	evm.model.jcf7180002759578.283	7e-45
## Alignment 12: score=798.0 e_value=7.1e-43 N=17 NC_033621.1&jcf7180002759578 minus
12- 0:	XP_020096305.1	evm.model.jcf7180002759578.106	1e-64
12- 1:	XP_020099443.1	evm.model.jcf7180002759578.100	1e-150
12- 2:	XP_020101681.1	evm.model.jcf7180002759578.98	2e-44
12- 3:	XP_020101669.1	evm.model.jcf7180002759578.96	2e-147
12- 4:	XP_020099630.1	evm.model.jcf7180002759578.90	0
12- 5:	XP_020093925.1	evm.model.jcf7180002759578.61	0
12- 6:	XP_020085532.1	evm.model.jcf7180002759578.58	2e-13
12- 7:	XP_020085526.1	evm.model.jcf7180002759578.53	0
12- 8:	XP_020106681.1	evm.model.jcf7180002759578.50	0
12- 9:	XP_020101500.1	evm.model.jcf7180002759578.47	2e-140
12- 10:	XP_020096634.1	evm.model.jcf7180002759578.45	6e-108
12- 11:	XP_020079679.1	evm.model.jcf7180002759578.41	4e-36
12- 12:	XP_020085553.1	evm.model.jcf7180002759578.37	3e-47
12- 13:	XP_020090397.1	evm.model.jcf7180002759578.34	6e-29
12- 14:	XP_020099954.1	evm.model.jcf7180002759578.24	0
12- 15:	XP_020086653.1	evm.model.jcf7180002759578.20	2e-38
12- 16:	XP_020103695.1	evm.model.jcf7180002759578.15	2e-61
## Alignment 13: score=259.0 e_value=1.4e-08 N=6 NC_033621.1&jcf7180002759590 minus
13- 0:	XP_020113201.1	evm.model.jcf7180002759590.94	3e-24
13- 1:	XP_020113397.1	evm.model.jcf7180002759590.66	3e-08
13- 2:	XP_020113508.1	evm.model.jcf7180002759590.51	4e-26
13- 3:	XP_020093649.1	evm.model.jcf7180002759590.43	0
13- 4:	XP_020097877.1	evm.model.jcf7180002759590.21	1e-115
13- 5:	XP_020091830.1	evm.model.jcf7180002759590.19	0
## Alignment 14: score=349.0 e_value=1.8e-15 N=8 NC_033621.1&jcf7180002766327 minus
14- 0:	XP_020088256.1	evm.model.jcf7180002766327.107	2e-21
14- 1:	XP_020083174.1	evm.model.jcf7180002766327.86	2e-08
14- 2:	XP_020101377.1	evm.model.jcf7180002766327.46	8e-167
14- 3:	XP_020083885.1	evm.model.jcf7180002766327.45	0
14- 4:	XP_020086101.1	evm.model.jcf7180002766327.38	2e-61
14- 5:	XP_020096956.1	evm.model.jcf7180002766327.30	2e-113
14- 6:	XP_020104068.1	evm.model.jcf7180002766327.10	2e-26
14- 7:	XP_020083245.1	evm.model.jcf7180002766327.6	5e-112
## Alignment 15: score=350.0 e_value=1.2e-14 N=8 NC_033621.1&jcf7180002766391 plus
15- 0:	XP_020100481.1	evm.model.jcf7180002766391.108	0
15- 1:	XP_020097296.1	evm.model.jcf7180002766391.140	0
15- 2:	XP_020108641.1	evm.model.jcf7180002766391.172	6e-84
15- 3:	XP_020094865.1	evm.model.jcf7180002766391.173	3e-162
15- 4:	XP_020103953.1	evm.model.jcf7180002766391.187	6e-173
15- 5:	XP_020097512.1	evm.model.jcf7180002766391.198	4e-136
15- 6:	XP_020102172.1	evm.model.jcf7180002766391.206	6e-49
15- 7:	XP_020106421.1	evm.model.jcf7180002766391.213	5e-84
## Alignment 16: score=418.0 e_value=1.5e-17 N=9 NC_033621.1&jcf7180002766393 minus
16- 0:	XP_020090107.1	evm.model.jcf7180002766393.272	2e-93
16- 1:	XP_020096033.1	evm.model.jcf7180002766393.257	0
16- 2:	XP_020094889.1	evm.model.jcf7180002766393.256	4e-160
16- 3:	XP_020091913.1	evm.model.jcf7180002766393.254	5e-151
16- 4:	XP_020092008.1	evm.model.jcf7180002766393.253	3e-173
16- 5:	XP_020092015.1	evm.model.jcf7180002766393.252	1e-60
16- 6:	XP_020115163.1	evm.model.jcf7180002766393.250	3e-123
16- 7:	XP_020089743.1	evm.model.jcf7180002766393.232	2e-51
16- 8:	XP_020103985.1	evm.model.jcf7180002766393.230	2e-64
## Alignment 17: score=381.0 e_value=2.6e-15 N=8 NC_033621.1&jcf7180002766406 plus
17- 0:	XP_020098270.1	evm.model.jcf7180002766406.3	2e-34
17- 1:	XP_020090490.1	evm.model.jcf7180002766406.5	0
17- 2:	XP_020083830.1	evm.model.jcf7180002766406.14	7e-31
17- 3:	XP_020091867.1	evm.model.jcf7180002766406.22	2e-93
17- 4:	XP_020091830.1	evm.model.jcf7180002766406.24	6e-40
17- 5:	XP_020091855.1	evm.model.jcf7180002766406.25	1e-55
17- 6:	XP_020094845.1	evm.model.jcf7180002766406.26	3e-99
17- 7:	XP_020092770.1	evm.model.jcf7180002766406.52	3e-29
## Alignment 18: score=269.0 e_value=4.6e-12 N=7 NC_033621.1&jcf7180002766482 plus
18- 0:	XP_020110134.1	evm.model.jcf7180002766482.7	4e-59
18- 1:	XP_020094336.1	evm.model.jcf7180002766482.13	3e-147
18- 2:	XP_020084908.1	evm.model.jcf7180002766482.41	1e-59
18- 3:	XP_020090574.1	evm.model.jcf7180002766482.80	1e-33
18- 4:	XP_020100537.1	evm.model.jcf7180002766482.111	1e-68
18- 5:	XP_020103347.1	evm.model.jcf7180002766482.114	2e-23
18- 6:	XP_020110695.1	evm.model.jcf7180002766482.169	0
## Alignment 19: score=468.0 e_value=7.7e-24 N=11 NC_033621.1&jcf7180002766482 minus
19- 0:	XP_020104048.1	evm.model.jcf7180002766482.208	5e-48
19- 1:	XP_020099942.1	evm.model.jcf7180002766482.205	7e-24
19- 2:	XP_020086532.1	evm.model.jcf7180002766482.196	5e-13
19- 3:	XP_020103546.1	evm.model.jcf7180002766482.191	2e-45
19- 4:	XP_020103474.1	evm.model.jcf7180002766482.185	3e-86
19- 5:	XP_020096089.1	evm.model.jcf7180002766482.182	0
19- 6:	XP_020090060.1	evm.model.jcf7180002766482.152	6e-38
19- 7:	XP_020094726.1	evm.model.jcf7180002766482.138	0
19- 8:	XP_020091285.1	evm.model.jcf7180002766482.115	9e-79
19- 9:	XP_020091135.1	evm.model.jcf7180002766482.93	1e-147
19- 10:	XP_020104881.1	evm.model.jcf7180002766482.72	0
## Alignment 20: score=449.0 e_value=1.3e-20 N=10 NC_033621.1&jcf7180002766482 minus
20- 0:	XP_020101577.1	evm.model.jcf7180002766482.95	9e-13
20- 1:	XP_020099237.1	evm.model.jcf7180002766482.93	1e-147
20- 2:	XP_020112738.1	evm.model.jcf7180002766482.72	1e-114
20- 3:	XP_020084761.1	evm.model.jcf7180002766482.65	1e-63
20- 4:	XP_020083737.1	evm.model.jcf7180002766482.58	5e-133
20- 5:	XP_020101233.1	evm.model.jcf7180002766482.26	7e-41
20- 6:	XP_020101244.1	evm.model.jcf7180002766482.23	3e-27
20- 7:	XP_020094289.1	evm.model.jcf7180002766482.18	0
20- 8:	XP_020096471.1	evm.model.jcf7180002766482.14	0
20- 9:	XP_020097065.1	evm.model.jcf7180002766482.9	5e-160
## Alignment 21: score=907.0 e_value=3.7e-61 N=22 NC_033621.1&jcf7180002766493 minus
21- 0:	XP_020099609.1	evm.model.jcf7180002766493.211	6e-119
21- 1:	XP_020098209.1	evm.model.jcf7180002766493.210	0
21- 2:	XP_020083437.1	evm.model.jcf7180002766493.207	1e-92
21- 3:	XP_020095456.1	evm.model.jcf7180002766493.202	8e-55
21- 4:	XP_020112186.1	evm.model.jcf7180002766493.185	1e-20
21- 5:	XP_020083136.1	evm.model.jcf7180002766493.180	7e-31
21- 6:	XP_020095440.1	evm.model.jcf7180002766493.167	2e-180
21- 7:	XP_020105894.1	evm.model.jcf7180002766493.161	1e-157
21- 8:	XP_020093828.1	evm.model.jcf7180002766493.153	7e-21
21- 9:	XP_020088781.1	evm.model.jcf7180002766493.140	0
21- 10:	XP_020102541.1	evm.model.jcf7180002766493.127	0
21- 11:	XP_020096944.1	evm.model.jcf7180002766493.121	2e-121
21- 12:	XP_020087326.1	evm.model.jcf7180002766493.101	4e-141
21- 13:	XP_020100749.1	evm.model.jcf7180002766493.90	2e-42
21- 14:	XP_020092380.1	evm.model.jcf7180002766493.79	2e-42
21- 15:	XP_020106100.1	evm.model.jcf7180002766493.69	7e-47
21- 16:	XP_020097784.1	evm.model.jcf7180002766493.44	4e-53
21- 17:	XP_020097984.1	evm.model.jcf7180002766493.37	1e-63
21- 18:	XP_020100633.1	evm.model.jcf7180002766493.20	3e-44
21- 19:	XP_020098839.1	evm.model.jcf7180002766493.16	2e-15
21- 20:	XP_020083213.1	evm.model.jcf7180002766493.15	5e-12
21- 21:	XP_020099362.1	evm.model.jcf7180002766493.3	2e-28
## Alignment 22: score=277.0 e_value=9.8e-09 N=6 NC_033621.1&jcf7180002766509 plus
22- 0:	XP_020097877.1	evm.model.jcf7180002766509.12	4e-116
22- 1:	XP_020091867.1	evm.model.jcf7180002766509.15	7e-84
22- 2:	XP_020094845.1	evm.model.jcf7180002766509.20	1e-94
22- 3:	XP_020097124.1	evm.model.jcf7180002766509.23	6e-167
22- 4:	XP_020113712.1	evm.model.jcf7180002766509.52	2e-59
22- 5:	XP_020100041.1	evm.model.jcf7180002766509.64	4e-46
## Alignment 23: score=263.0 e_value=2.3e-08 N=6 NC_033621.1&jcf7180002766509 plus
23- 0:	XP_020106557.1	evm.model.jcf7180002766509.112	2e-51
23- 1:	XP_020101455.1	evm.model.jcf7180002766509.123	5e-63
23- 2:	XP_020100681.1	evm.model.jcf7180002766509.125	0
23- 3:	XP_020101500.1	evm.model.jcf7180002766509.138	4e-57
23- 4:	XP_020085553.1	evm.model.jcf7180002766509.150	3e-55
23- 5:	XP_020101441.1	evm.model.jcf7180002766509.152	9e-58
## Alignment 24: score=274.0 e_value=3.6e-09 N=6 NC_033621.1&jcf7180002766528 minus
24- 0:	XP_020098633.1	evm.model.jcf7180002766528.131	1e-06
24- 1:	XP_020098626.1	evm.model.jcf7180002766528.128	6e-89
24- 2:	XP_020087399.1	evm.model.jcf7180002766528.125	0
24- 3:	XP_020095493.1	evm.model.jcf7180002766528.105	0
24- 4:	XP_020100980.1	evm.model.jcf7180002766528.98	0
24- 5:	XP_020097568.1	evm.model.jcf7180002766528.88	0
## Alignment 25: score=549.0 e_value=1.2e-26 N=12 NC_033621.1&jcf7180002766540 minus
25- 0:	XP_020086408.1	evm.model.jcf7180002766540.76	4e-70
25- 1:	XP_020098598.1	evm.model.jcf7180002766540.75	3e-66
25- 2:	XP_020097148.1	evm.model.jcf7180002766540.71	2e-60
25- 3:	XP_020086757.1	evm.model.jcf7180002766540.57	0.001
25- 4:	XP_020099454.1	evm.model.jcf7180002766540.53	0
25- 5:	XP_020079639.1	evm.model.jcf7180002766540.47	1e-152
25- 6:	XP_020085277.1	evm.model.jcf7180002766540.31	1e-71
25- 7:	XP_020102993.1	evm.model.jcf7180002766540.27	6e-26
25- 8:	XP_020087514.1	evm.model.jcf7180002766540.20	2e-113
25- 9:	XP_020106360.1	evm.model.jcf7180002766540.13	3e-127
25- 10:	XP_020106013.1	evm.model.jcf7180002766540.12	8e-29
25- 11:	XP_020085107.1	evm.model.jcf7180002766540.1	2e-64
## Alignment 26: score=422.0 e_value=2.6e-17 N=9 NC_033621.1&jcf7180002766563 plus
26- 0:	XP_020106100.1	evm.model.jcf7180002766563.307	3e-58
26- 1:	XP_020087411.1	evm.model.jcf7180002766563.314	9e-120
26- 2:	XP_020097784.1	evm.model.jcf7180002766563.332	5e-84
26- 3:	XP_020097984.1	evm.model.jcf7180002766563.339	1e-63
26- 4:	XP_020098092.1	evm.model.jcf7180002766563.340	2e-19
26- 5:	XP_020101274.1	evm.model.jcf7180002766563.354	2e-18
26- 6:	XP_020100633.1	evm.model.jcf7180002766563.355	3e-30
26- 7:	XP_020098839.1	evm.model.jcf7180002766563.359	2e-13
26- 8:	XP_020083213.1	evm.model.jcf7180002766563.361	2e-16
## Alignment 27: score=681.0 e_value=4.1e-37 N=15 NC_033621.1&jcf7180002766592 plus
27- 0:	XP_020102621.1	evm.model.jcf7180002766592.25	1e-115
27- 1:	XP_020106312.1	evm.model.jcf7180002766592.43	2e-42
27- 2:	XP_020104329.1	evm.model.jcf7180002766592.49	1e-68
27- 3:	XP_020104383.1	evm.model.jcf7180002766592.53	1e-16
27- 4:	XP_020104304.1	evm.model.jcf7180002766592.55	0
27- 5:	XP_020095400.1	evm.model.jcf7180002766592.74	0
27- 6:	XP_020093525.1	evm.model.jcf7180002766592.77	5e-26
27- 7:	XP_020093537.1	evm.model.jcf7180002766592.81	5e-77
27- 8:	XP_020084465.1	evm.model.jcf7180002766592.83	0
27- 9:	XP_020091328.1	evm.model.jcf7180002766592.91	2e-18
27- 10:	XP_020100899.1	evm.model.jcf7180002766592.94	0
27- 11:	XP_020099225.1	evm.model.jcf7180002766592.116	0
27- 12:	XP_020100090.1	evm.model.jcf7180002766592.124	4e-17
27- 13:	XP_020088395.1	evm.model.jcf7180002766592.136	4e-176
27- 14:	XP_020085018.1	evm.model.jcf7180002766592.138	2e-28
## Alignment 28: score=298.0 e_value=2.1e-11 N=7 NC_033621.1&jcf7180002766611 plus
28- 0:	XP_020091043.1	evm.model.jcf7180002766611.97	3e-33
28- 1:	XP_020105445.1	evm.model.jcf7180002766611.99	5e-63
28- 2:	XP_020086276.1	evm.model.jcf7180002766611.106	3e-114
28- 3:	XP_020104280.1	evm.model.jcf7180002766611.147	0
28- 4:	XP_020104293.1	evm.model.jcf7180002766611.150	3e-57
28- 5:	XP_020095400.1	evm.model.jcf7180002766611.161	0
28- 6:	XP_020084451.1	evm.model.jcf7180002766611.170	0
## Alignment 29: score=448.0 e_value=1.6e-21 N=10 NC_033621.1&jcf7180002766623 minus
29- 0:	XP_020090303.1	evm.model.jcf7180002766623.111	0
29- 1:	XP_020096199.1	evm.model.jcf7180002766623.107	5e-90
29- 2:	XP_020083564.1	evm.model.jcf7180002766623.88	0
29- 3:	XP_020096489.1	evm.model.jcf7180002766623.85	0
29- 4:	XP_020098633.1	evm.model.jcf7180002766623.84	0.0002
29- 5:	XP_020098626.1	evm.model.jcf7180002766623.82	0
29- 6:	XP_020087399.1	evm.model.jcf7180002766623.79	5e-87
29- 7:	XP_020095493.1	evm.model.jcf7180002766623.55	0
29- 8:	XP_020100980.1	evm.model.jcf7180002766623.47	0
29- 9:	XP_020097568.1	evm.model.jcf7180002766623.41	0
## Alignment 30: score=300.0 e_value=1.2e-12 N=7 NC_033621.1&jcf7180002766685 minus
30- 0:	XP_020100413.1	evm.model.jcf7180002766685.204	3e-42
30- 1:	XP_020082925.1	evm.model.jcf7180002766685.198	2e-138
30- 2:	XP_020104462.1	evm.model.jcf7180002766685.196	3e-07
30- 3:	XP_020105277.1	evm.model.jcf7180002766685.135	3e-95
30- 4:	XP_020086666.1	evm.model.jcf7180002766685.122	4e-116
30- 5:	XP_020092832.1	evm.model.jcf7180002766685.120	3e-39
30- 6:	XP_020085979.1	evm.model.jcf7180002766685.110	3e-14
## Alignment 31: score=782.0 e_value=1.2e-47 N=17 NC_033621.1&jcf7180002766692 minus
31- 0:	XP_020094002.1	evm.model.jcf7180002766692.136	8e-36
31- 1:	XP_020101635.1	evm.model.jcf7180002766692.135	1e-22
31- 2:	XP_020098082.1	evm.model.jcf7180002766692.134	0
31- 3:	XP_020092795.1	evm.model.jcf7180002766692.131	0
31- 4:	XP_020092823.1	evm.model.jcf7180002766692.128	3e-111
31- 5:	XP_020101466.1	evm.model.jcf7180002766692.127	3e-116
31- 6:	XP_020094954.1	evm.model.jcf7180002766692.123	9e-43
31- 7:	XP_020096253.1	evm.model.jcf7180002766692.108	1e-72
31- 8:	XP_020084242.1	evm.model.jcf7180002766692.104	2e-42
31- 9:	XP_020102228.1	evm.model.jcf7180002766692.80	2e-91
31- 10:	XP_020102035.1	evm.model.jcf7180002766692.76	6e-50
31- 11:	XP_020102044.1	evm.model.jcf7180002766692.74	7e-48
31- 12:	XP_020105288.1	evm.model.jcf7180002766692.72	2e-33
31- 13:	XP_020099713.1	evm.model.jcf7180002766692.71	3e-143
31- 14:	XP_020089411.1	evm.model.jcf7180002766692.60	1e-98
31- 15:	XP_020089424.1	evm.model.jcf7180002766692.59	2e-47
31- 16:	XP_020106565.1	evm.model.jcf7180002766692.53	0.5
## Alignment 32: score=255.0 e_value=2.2e-09 N=6 NC_033621.1&jcf7180002766697 minus
32- 0:	XP_020094047.1	evm.model.jcf7180002766697.222	4e-154
32- 1:	XP_020083801.1	evm.model.jcf7180002766697.209	0
32- 2:	XP_020083782.1	evm.model.jcf7180002766697.207	0
32- 3:	XP_020083748.1	evm.model.jcf7180002766697.202	0
32- 4:	XP_020092205.1	evm.model.jcf7180002766697.166	4e-74
32- 5:	XP_020100108.1	evm.model.jcf7180002766697.155	7e-31
## Alignment 33: score=630.0 e_value=3e-35 N=14 NC_033621.1&jcf7180002766702 plus
33- 0:	XP_020097956.1	evm.model.jcf7180002766702.99	0
33- 1:	XP_020097938.1	evm.model.jcf7180002766702.102	6e-14
33- 2:	XP_020092060.1	evm.model.jcf7180002766702.109	1e-66
33- 3:	XP_020104474.1	evm.model.jcf7180002766702.118	5e-91
33- 4:	XP_020104484.1	evm.model.jcf7180002766702.119	9e-149
33- 5:	XP_020104512.1	evm.model.jcf7180002766702.122	3e-121
33- 6:	XP_020086108.1	evm.model.jcf7180002766702.124	9e-24
33- 7:	XP_020086276.1	evm.model.jcf7180002766702.135	2e-117
33- 8:	XP_020102621.1	evm.model.jcf7180002766702.171	1e-116
33- 9:	XP_020089626.1	evm.model.jcf7180002766702.173	0
33- 10:	XP_020104383.1	evm.model.jcf7180002766702.191	2e-18
33- 11:	XP_020104304.1	evm.model.jcf7180002766702.192	0
33- 12:	XP_020095400.1	evm.model.jcf7180002766702.202	0
33- 13:	XP_020093525.1	evm.model.jcf7180002766702.204	0
## Alignment 34: score=799.0 e_value=1.7e-44 N=17 NC_033621.1&jcf7180002766702 minus
34- 0:	XP_020111745.1	evm.model.jcf7180002766702.94	4
34- 1:	XP_020095974.1	evm.model.jcf7180002766702.81	1e-103
34- 2:	XP_020102309.1	evm.model.jcf7180002766702.78	1e-67
34- 3:	XP_020102320.1	evm.model.jcf7180002766702.77	4e-14
34- 4:	XP_020098103.1	evm.model.jcf7180002766702.75	4e-99
34- 5:	XP_020094531.1	evm.model.jcf7180002766702.74	0
34- 6:	XP_020090029.1	evm.model.jcf7180002766702.60	3e-50
34- 7:	XP_020093988.1	evm.model.jcf7180002766702.59	7e-133
34- 8:	XP_020103797.1	evm.model.jcf7180002766702.53	4e-25
34- 9:	XP_020092795.1	evm.model.jcf7180002766702.52	0
34- 10:	XP_020093247.1	evm.model.jcf7180002766702.48	4e-62
34- 11:	XP_020085938.1	evm.model.jcf7180002766702.47	1e-52
34- 12:	XP_020094954.1	evm.model.jcf7180002766702.44	1e-45
34- 13:	XP_020105025.1	evm.model.jcf7180002766702.39	9e-175
34- 14:	XP_020105685.1	evm.model.jcf7180002766702.37	7e-45
34- 15:	XP_020096253.1	evm.model.jcf7180002766702.23	2e-76
34- 16:	XP_020084242.1	evm.model.jcf7180002766702.21	2e-129
## Alignment 35: score=382.0 e_value=4.9e-15 N=8 NC_033621.1&jcf7180002766750 plus
35- 0:	XP_020106514.1	evm.model.jcf7180002766750.3	4e-162
35- 1:	XP_020093630.1	evm.model.jcf7180002766750.8	3e-83
35- 2:	XP_020102193.1	evm.model.jcf7180002766750.22	0
35- 3:	XP_020086117.1	evm.model.jcf7180002766750.29	1e-59
35- 4:	XP_020083423.1	evm.model.jcf7180002766750.30	0
35- 5:	XP_020104186.1	evm.model.jcf7180002766750.37	4e-55
35- 6:	XP_020104147.1	evm.model.jcf7180002766750.41	0
35- 7:	XP_020086075.1	evm.model.jcf7180002766750.42	7e-105
## Alignment 36: score=534.0 e_value=5.6e-28 N=12 NC_033621.1&jcf7180002766873 plus
36- 0:	XP_020102855.1	evm.model.jcf7180002766873.1	2e-150
36- 1:	XP_020086653.1	evm.model.jcf7180002766873.3	2e-47
36- 2:	XP_020103695.1	evm.model.jcf7180002766873.6	2e-25
36- 3:	XP_020093159.1	evm.model.jcf7180002766873.22	0
36- 4:	XP_020094943.1	evm.model.jcf7180002766873.23	6e-58
36- 5:	XP_020085376.1	evm.model.jcf7180002766873.25	1e-25
36- 6:	XP_020096164.1	evm.model.jcf7180002766873.41	2e-13
36- 7:	XP_020100933.1	evm.model.jcf7180002766873.59	9e-44
36- 8:	XP_020084359.1	evm.model.jcf7180002766873.64	0
36- 9:	XP_020095939.1	evm.model.jcf7180002766873.69	6e-139
36- 10:	XP_020099213.1	evm.model.jcf7180002766873.75	3e-28
36- 11:	XP_020083489.1	evm.model.jcf7180002766873.110	2e-20
## Alignment 37: score=331.0 e_value=3.4e-11 N=7 NC_033621.1&jcf7180002766949 plus
37- 0:	XP_020106545.1	evm.model.jcf7180002766949.9	2e-156
37- 1:	XP_020089438.1	evm.model.jcf7180002766949.12	0
37- 2:	XP_020089651.1	evm.model.jcf7180002766949.17	7e-149
37- 3:	XP_020098308.1	evm.model.jcf7180002766949.20	0.009
37- 4:	XP_020100633.1	evm.model.jcf7180002766949.22	5e-35
37- 5:	XP_020094901.1	evm.model.jcf7180002766949.30	1e-35
37- 6:	XP_020094429.1	evm.model.jcf7180002766949.32	5e-99
## Alignment 38: score=407.0 e_value=2.6e-17 N=9 NC_033621.1&jcf7180002767037 minus
38- 0:	XP_020097683.1	evm.model.jcf7180002767037.52	0
38- 1:	XP_020097694.1	evm.model.jcf7180002767037.50	6e-86
38- 2:	XP_020097712.1	evm.model.jcf7180002767037.48	0.007
38- 3:	XP_020085875.1	evm.model.jcf7180002767037.38	0
38- 4:	XP_020085862.1	evm.model.jcf7180002767037.37	0
38- 5:	XP_020086475.1	evm.model.jcf7180002767037.17	5e-137
38- 6:	XP_020095356.1	evm.model.jcf7180002767037.9	9e-143
38- 7:	XP_020088042.1	evm.model.jcf7180002767037.3	6e-20
38- 8:	XP_020084211.1	evm.model.jcf7180002767037.2	0
## Alignment 39: score=363.0 e_value=6.9e-14 N=8 NC_033621.1&jcf7180002767054 minus
39- 0:	XP_020104766.1	evm.model.jcf7180002767054.80	0
39- 1:	XP_020088683.1	evm.model.jcf7180002767054.79	6e-89
39- 2:	XP_020093563.1	evm.model.jcf7180002767054.74	0
39- 3:	XP_020088723.1	evm.model.jcf7180002767054.66	4e-87
39- 4:	XP_020083855.1	evm.model.jcf7180002767054.59	0
39- 5:	XP_020093451.1	evm.model.jcf7180002767054.54	1e-100
39- 6:	XP_020093434.1	evm.model.jcf7180002767054.53	9e-51
39- 7:	XP_020093359.1	evm.model.jcf7180002767054.45	4e-54
## Alignment 40: score=563.0 e_value=3.6e-31 N=13 NC_033621.1&jcf7180002767163 plus
40- 0:	XP_020105894.1	evm.model.jcf7180002767163.1	8e-125
40- 1:	XP_020098613.1	evm.model.jcf7180002767163.2	1e-30
40- 2:	XP_020084393.1	evm.model.jcf7180002767163.5	5e-110
40- 3:	XP_020084413.1	evm.model.jcf7180002767163.6	1e-38
40- 4:	XP_020104076.1	evm.model.jcf7180002767163.10	0
40- 5:	XP_020096944.1	evm.model.jcf7180002767163.17	0
40- 6:	XP_020087326.1	evm.model.jcf7180002767163.24	2e-158
40- 7:	XP_020099888.1	evm.model.jcf7180002767163.26	6e-102
40- 8:	XP_020106100.1	evm.model.jcf7180002767163.31	2e-18
40- 9:	XP_020087456.1	evm.model.jcf7180002767163.33	4e-51
40- 10:	XP_020087411.1	evm.model.jcf7180002767163.34	1e-130
40- 11:	XP_020098193.1	evm.model.jcf7180002767163.44	1e-11
40- 12:	XP_020084897.1	evm.model.jcf7180002767163.47	1e-49
## Alignment 41: score=320.0 e_value=2.1e-12 N=7 NC_033621.1&jcf7180002767307 minus
41- 0:	XP_020100776.1	evm.model.jcf7180002767307.68	9e-20
41- 1:	XP_020093890.1	evm.model.jcf7180002767307.65	0
41- 2:	XP_020089543.1	evm.model.jcf7180002767307.64	2e-78
41- 3:	XP_020098103.1	evm.model.jcf7180002767307.58	1e-109
41- 4:	XP_020094548.1	evm.model.jcf7180002767307.57	0
41- 5:	XP_020094531.1	evm.model.jcf7180002767307.53	0
41- 6:	XP_020094011.1	evm.model.jcf7180002767307.39	2
## Alignment 42: score=321.0 e_value=9.7e-11 N=7 NC_033621.1&jcf7180002767435 plus
42- 0:	XP_020084614.1	evm.model.jcf7180002767435.92	0.5
42- 1:	XP_020103973.1	evm.model.jcf7180002767435.97	0
42- 2:	XP_020085249.1	evm.model.jcf7180002767435.99	3e-71
42- 3:	XP_020100226.1	evm.model.jcf7180002767435.116	0
42- 4:	XP_020089468.1	evm.model.jcf7180002767435.124	0
42- 5:	XP_020082925.1	evm.model.jcf7180002767435.142	2e-146
42- 6:	XP_020104462.1	evm.model.jcf7180002767435.145	5e-08
## Alignment 43: score=332.0 e_value=2e-13 N=7 NC_033621.1&jcf7180002767446 plus
43- 0:	XP_020083737.1	evm.model.jcf7180002767446.14	4e-143
43- 1:	XP_020085395.1	evm.model.jcf7180002767446.17	4e-75
43- 2:	XP_020094289.1	evm.model.jcf7180002767446.29	0
43- 3:	XP_020094487.1	evm.model.jcf7180002767446.30	4e-159
43- 4:	XP_020100913.1	evm.model.jcf7180002767446.41	5e-67
43- 5:	XP_020113094.1	evm.model.jcf7180002767446.42	4e-36
43- 6:	XP_020100016.1	evm.model.jcf7180002767446.43	4e-40
## Alignment 44: score=413.0 e_value=1.4e-16 N=9 NC_033621.1&jcf7180002767482 plus
44- 0:	XP_020089677.1	evm.model.jcf7180002767482.5	0
44- 1:	XP_020099289.1	evm.model.jcf7180002767482.6	0
44- 2:	XP_020096242.1	evm.model.jcf7180002767482.13	2e-86
44- 3:	XP_020084557.1	evm.model.jcf7180002767482.19	8e-60
44- 4:	XP_020106250.1	evm.model.jcf7180002767482.25	0
44- 5:	XP_020099336.1	evm.model.jcf7180002767482.31	0
44- 6:	XP_020100463.1	evm.model.jcf7180002767482.43	2e-102
44- 7:	XP_020096901.1	evm.model.jcf7180002767482.45	5e-23
44- 8:	XP_020090597.1	evm.model.jcf7180002767482.46	0
## Alignment 45: score=287.0 e_value=6.3e-08 N=6 NC_033621.1&jcf7180002767545 plus
45- 0:	XP_020094910.1	evm.model.jcf7180002767545.1	7e-126
45- 1:	XP_020091913.1	evm.model.jcf7180002767545.2	1e-93
45- 2:	XP_020091924.1	evm.model.jcf7180002767545.3	0
45- 3:	XP_020092008.1	evm.model.jcf7180002767545.4	7e-179
45- 4:	XP_020092015.1	evm.model.jcf7180002767545.5	5e-61
45- 5:	XP_020089724.1	evm.model.jcf7180002767545.8	2e-43
## Alignment 46: score=279.0 e_value=7.7e-09 N=6 NC_033621.1&jcf7180002767653 plus
46- 0:	XP_020092942.1	evm.model.jcf7180002767653.9	0
46- 1:	XP_020092897.1	evm.model.jcf7180002767653.11	6e-135
46- 2:	XP_020092954.1	evm.model.jcf7180002767653.13	2e-62
46- 3:	XP_020103734.1	evm.model.jcf7180002767653.15	2e-63
46- 4:	XP_020092139.1	evm.model.jcf7180002767653.33	1e-26
46- 5:	XP_020092126.1	evm.model.jcf7180002767653.49	4e-85
## Alignment 47: score=447.0 e_value=1.9e-19 N=10 NC_033621.1&jcf7180002767727 plus
47- 0:	XP_020092460.1	evm.model.jcf7180002767727.2	1e-118
47- 1:	XP_020100314.1	evm.model.jcf7180002767727.5	3e-102
47- 2:	XP_020083554.1	evm.model.jcf7180002767727.10	0
47- 3:	XP_020096956.1	evm.model.jcf7180002767727.32	8e-152
47- 4:	XP_020086827.1	evm.model.jcf7180002767727.46	2e-160
47- 5:	XP_020083232.1	evm.model.jcf7180002767727.59	0
47- 6:	XP_020103837.1	evm.model.jcf7180002767727.73	0
47- 7:	XP_020091578.1	evm.model.jcf7180002767727.84	2e-25
47- 8:	XP_020083479.1	evm.model.jcf7180002767727.102	8e-25
47- 9:	XP_020083891.1	evm.model.jcf7180002767727.109	4e-26
## Alignment 48: score=324.0 e_value=5.2e-12 N=7 NC_033621.1&jcf7180002767768 plus
48- 0:	XP_020100101.1	evm.model.jcf7180002767768.21	0
48- 1:	XP_020105149.1	evm.model.jcf7180002767768.22	2e-132
48- 2:	XP_020082346.1	evm.model.jcf7180002767768.23	5e-28
48- 3:	XP_020105402.1	evm.model.jcf7180002767768.24	2e-42
48- 4:	XP_020084393.1	evm.model.jcf7180002767768.27	5e-110
48- 5:	XP_020084413.1	evm.model.jcf7180002767768.33	3e-56
48- 6:	XP_020084433.1	evm.model.jcf7180002767768.46	4e-152
## Alignment 49: score=281.0 e_value=8.9e-09 N=6 NC_033621.1&jcf7180002767919 minus
49- 0:	XP_020105572.1	evm.model.jcf7180002767919.32	5e-102
49- 1:	XP_020102621.1	evm.model.jcf7180002767919.27	4e-123
49- 2:	XP_020089626.1	evm.model.jcf7180002767919.26	0
49- 3:	XP_020084478.1	evm.model.jcf7180002767919.22	1e-55
49- 4:	XP_020104259.1	evm.model.jcf7180002767919.19	4e-30
49- 5:	XP_020104329.1	evm.model.jcf7180002767919.18	1e-71
## Alignment 50: score=334.0 e_value=6.4e-12 N=7 NC_033621.1&jcf7180002768185 plus
50- 0:	XP_020105552.1	evm.model.jcf7180002768185.1	5e-134
50- 1:	XP_020114133.1	evm.model.jcf7180002768185.2	2e-15
50- 2:	XP_020097058.1	evm.model.jcf7180002768185.3	6e-54
50- 3:	XP_020106626.1	evm.model.jcf7180002768185.10	0
50- 4:	XP_020106645.1	evm.model.jcf7180002768185.11	3e-108
50- 5:	XP_020105696.1	evm.model.jcf7180002768185.13	1e-172
50- 6:	XP_020100054.1	evm.model.jcf7180002768185.17	1e-52
## Alignment 51: score=285.0 e_value=5.7e-11 N=7 NC_033621.1&jcf7180002768790 minus
51- 0:	XP_020083867.1	evm.model.jcf7180002768790.23	0
51- 1:	XP_020093170.1	evm.model.jcf7180002768790.16	6e-18
51- 2:	XP_020097751.1	evm.model.jcf7180002768790.15	1e-70
51- 3:	XP_020106391.1	evm.model.jcf7180002768790.13	1e-60
51- 4:	XP_020084675.1	evm.model.jcf7180002768790.11	1e-37
51- 5:	XP_020096746.1	evm.model.jcf7180002768790.7	0
51- 6:	XP_020088226.1	evm.model.jcf7180002768790.4	0
## Alignment 52: score=296.0 e_value=7.6e-08 N=6 NC_033621.1&jcf7180002769171 plus
52- 0:	XP_020096884.1	evm.model.jcf7180002769171.3	9e-70
52- 1:	XP_020099213.1	evm.model.jcf7180002769171.6	1e-23
52- 2:	XP_020084593.1	evm.model.jcf7180002769171.15	4e-162
52- 3:	XP_020114850.1	evm.model.jcf7180002769171.16	2e-21
52- 4:	XP_020097008.1	evm.model.jcf7180002769171.17	6e-93
52- 5:	XP_020101838.1	evm.model.jcf7180002769171.19	0
## Alignment 53: score=468.0 e_value=9e-21 N=10 NC_033621.1&jcf7180002779179 plus
53- 0:	XP_020083737.1	evm.model.jcf7180002779179.81	1e-73
53- 1:	XP_020093194.1	evm.model.jcf7180002779179.107	2e-67
53- 2:	XP_020093214.1	evm.model.jcf7180002779179.111	4e-99
53- 3:	XP_020101233.1	evm.model.jcf7180002779179.112	1e-40
53- 4:	XP_020101244.1	evm.model.jcf7180002779179.113	6e-28
53- 5:	XP_020094302.1	evm.model.jcf7180002779179.117	0
53- 6:	XP_020094289.1	evm.model.jcf7180002779179.123	0
53- 7:	XP_020096471.1	evm.model.jcf7180002779179.125	2e-131
53- 8:	XP_020097065.1	evm.model.jcf7180002779179.128	4e-84
53- 9:	XP_020098164.1	evm.model.jcf7180002779179.134	3e-180
## Alignment 54: score=253.0 e_value=3.3e-08 N=6 NC_033621.1&jcf7180002779460 plus
54- 0:	XP_020104462.1	evm.model.jcf7180002779460.24	0.4
54- 1:	XP_020094599.1	evm.model.jcf7180002779460.45	4e-94
54- 2:	XP_020101361.1	evm.model.jcf7180002779460.61	2e-79
54- 3:	XP_020086172.1	evm.model.jcf7180002779460.63	0
54- 4:	XP_020083532.1	evm.model.jcf7180002779460.77	1e-16
54- 5:	XP_020098220.1	evm.model.jcf7180002779460.97	3e-106
## Alignment 55: score=574.0 e_value=4.1e-25 N=12 NC_033621.1&jcf7180002779461 plus
55- 0:	XP_020095290.1	evm.model.jcf7180002779461.51	2e-63
55- 1:	XP_020097956.1	evm.model.jcf7180002779461.52	0
55- 2:	XP_020097938.1	evm.model.jcf7180002779461.57	1e-160
55- 3:	XP_020092060.1	evm.model.jcf7180002779461.60	2e-95
55- 4:	XP_020101102.1	evm.model.jcf7180002779461.61	0
55- 5:	XP_020104474.1	evm.model.jcf7180002779461.69	1e-95
55- 6:	XP_020104484.1	evm.model.jcf7180002779461.71	8e-148
55- 7:	XP_020104512.1	evm.model.jcf7180002779461.74	2e-122
55- 8:	XP_020106271.1	evm.model.jcf7180002779461.77	1e-73
55- 9:	XP_020106287.1	evm.model.jcf7180002779461.78	6e-14
55- 10:	XP_020091026.1	evm.model.jcf7180002779461.87	0
55- 11:	XP_020086276.1	evm.model.jcf7180002779461.96	9e-115
## Alignment 56: score=482.0 e_value=1.5e-20 N=10 NC_033621.1&jcf7180002779461 minus
56- 0:	XP_020095974.1	evm.model.jcf7180002779461.31	5e-109
56- 1:	XP_020102309.1	evm.model.jcf7180002779461.27	2e-178
56- 2:	XP_020102320.1	evm.model.jcf7180002779461.26	1e-17
56- 3:	XP_020098103.1	evm.model.jcf7180002779461.23	7e-96
56- 4:	XP_020094531.1	evm.model.jcf7180002779461.22	0
56- 5:	XP_020102269.1	evm.model.jcf7180002779461.21	2e-109
56- 6:	XP_020098417.1	evm.model.jcf7180002779461.18	0
56- 7:	XP_020083971.1	evm.model.jcf7180002779461.12	4e-23
56- 8:	XP_020090029.1	evm.model.jcf7180002779461.4	3e-89
56- 9:	XP_020093988.1	evm.model.jcf7180002779461.3	1e-129
## Alignment 57: score=780.0 e_value=7.1e-48 N=18 NC_033621.1&jcf7180002780839 minus
57- 0:	XP_020106557.1	evm.model.jcf7180002780839.268	1e-29
57- 1:	XP_020101455.1	evm.model.jcf7180002780839.257	2e-68
57- 2:	XP_020100681.1	evm.model.jcf7180002780839.244	0
57- 3:	XP_020093925.1	evm.model.jcf7180002780839.243	0
57- 4:	XP_020085473.1	evm.model.jcf7180002780839.241	1e-100
57- 5:	XP_020106681.1	evm.model.jcf7180002780839.231	0
57- 6:	XP_020101500.1	evm.model.jcf7180002780839.227	5e-135
57- 7:	XP_020085553.1	evm.model.jcf7180002780839.209	2e-50
57- 8:	XP_020103695.1	evm.model.jcf7180002780839.193	7e-60
57- 9:	XP_020093159.1	evm.model.jcf7180002780839.186	0
57- 10:	XP_020094943.1	evm.model.jcf7180002780839.185	6e-88
57- 11:	XP_020085376.1	evm.model.jcf7180002780839.184	4e-38
57- 12:	XP_020096164.1	evm.model.jcf7180002780839.162	4e-23
57- 13:	XP_020084359.1	evm.model.jcf7180002780839.142	0
57- 14:	XP_020084593.1	evm.model.jcf7180002780839.131	6e-156
57- 15:	XP_020097379.1	evm.model.jcf7180002780839.119	0
57- 16:	XP_020086117.1	evm.model.jcf7180002780839.107	3e-67
57- 17:	XP_020104186.1	evm.model.jcf7180002780839.91	2e-44
## Alignment 58: score=335.0 e_value=1.6e-11 N=7 NC_033621.1&jcf7180002780840 minus
58- 0:	XP_020086793.1	evm.model.jcf7180002780840.107	2e-05
58- 1:	XP_020099505.1	evm.model.jcf7180002780840.101	4e-13
58- 2:	XP_020104048.1	evm.model.jcf7180002780840.81	2e-23
58- 3:	XP_020086532.1	evm.model.jcf7180002780840.72	1e-15
58- 4:	XP_020103546.1	evm.model.jcf7180002780840.69	2e-122
58- 5:	XP_020103559.1	evm.model.jcf7180002780840.68	5e-12
58- 6:	XP_020103474.1	evm.model.jcf7180002780840.62	1e-90
## Alignment 59: score=966.0 e_value=9.5e-60 N=21 NC_033621.1&jcf7180002780879 plus
59- 0:	XP_020094396.1	evm.model.jcf7180002780879.76	0
59- 1:	XP_020098444.1	evm.model.jcf7180002780879.83	0
59- 2:	XP_020094508.1	evm.model.jcf7180002780879.85	2e-159
59- 3:	XP_020096502.1	evm.model.jcf7180002780879.88	5e-90
59- 4:	XP_020098633.1	evm.model.jcf7180002780879.89	6e-11
59- 5:	XP_020094610.1	evm.model.jcf7180002780879.91	2e-154
59- 6:	XP_020095504.1	evm.model.jcf7180002780879.93	0
59- 7:	XP_020095518.1	evm.model.jcf7180002780879.94	2e-145
59- 8:	XP_020095483.1	evm.model.jcf7180002780879.102	6e-173
59- 9:	XP_020094929.1	evm.model.jcf7180002780879.118	5e-19
59- 10:	XP_020103684.1	evm.model.jcf7180002780879.120	0
59- 11:	XP_020097568.1	evm.model.jcf7180002780879.122	0
59- 12:	XP_020094180.1	evm.model.jcf7180002780879.125	2e-35
59- 13:	XP_020094126.1	evm.model.jcf7180002780879.135	0
59- 14:	XP_020083938.1	evm.model.jcf7180002780879.154	8e-68
59- 15:	XP_020084740.1	evm.model.jcf7180002780879.156	0
59- 16:	XP_020090944.1	evm.model.jcf7180002780879.170	4e-80
59- 17:	XP_020090923.1	evm.model.jcf7180002780879.172	5e-99
59- 18:	XP_020091407.1	evm.model.jcf7180002780879.177	5e-78
59- 19:	XP_020086151.1	evm.model.jcf7180002780879.180	0
59- 20:	XP_020100163.1	evm.model.jcf7180002780879.182	0
## Alignment 60: score=374.0 e_value=1.4e-19 N=10 NC_033621.1&jcf7180002780879 plus
60- 0:	XP_020104258.1	evm.model.jcf7180002780879.57	4e-164
60- 1:	XP_020099692.1	evm.model.jcf7180002780879.65	1e-112
60- 2:	XP_020100173.1	evm.model.jcf7180002780879.78	3e-61
60- 3:	XP_020099137.1	evm.model.jcf7180002780879.100	8e-81
60- 4:	XP_020106428.1	evm.model.jcf7180002780879.109	3e-122
60- 5:	XP_020087603.1	evm.model.jcf7180002780879.134	0
60- 6:	XP_020106139.1	evm.model.jcf7180002780879.162	0
60- 7:	XP_020084603.1	evm.model.jcf7180002780879.188	3e-126
60- 8:	XP_020090781.1	evm.model.jcf7180002780879.196	0
60- 9:	XP_020089880.1	evm.model.jcf7180002780879.237	2e-58
## Alignment 61: score=321.0 e_value=1.8e-11 N=7 NC_033621.1&jcf7180002780879 plus
61- 0:	XP_020094276.1	evm.model.jcf7180002780879.192	2e-12
61- 1:	XP_020096312.1	evm.model.jcf7180002780879.194	4e-62
61- 2:	XP_020083748.1	evm.model.jcf7180002780879.197	0
61- 3:	XP_020090980.1	evm.model.jcf7180002780879.203	0
61- 4:	XP_020086051.1	evm.model.jcf7180002780879.206	1e-68
61- 5:	XP_020094452.1	evm.model.jcf7180002780879.213	5e-127
61- 6:	XP_020105816.1	evm.model.jcf7180002780879.229	4e-177
## Alignment 62: score=741.0 e_value=1.4e-38 N=16 NC_033621.1&jcf7180002780879 minus
62- 0:	XP_020085287.1	evm.model.jcf7180002780879.58	0
62- 1:	XP_020085324.1	evm.model.jcf7180002780879.55	4e-74
62- 2:	XP_020093464.1	evm.model.jcf7180002780879.54	5e-167
62- 3:	XP_020091252.1	evm.model.jcf7180002780879.52	0
62- 4:	XP_020091217.1	evm.model.jcf7180002780879.51	0
62- 5:	XP_020095735.1	evm.model.jcf7180002780879.47	0
62- 6:	XP_020097834.1	evm.model.jcf7180002780879.45	0
62- 7:	XP_020083437.1	evm.model.jcf7180002780879.42	1e-95
62- 8:	XP_020102745.1	evm.model.jcf7180002780879.35	0
62- 9:	XP_020088998.1	evm.model.jcf7180002780879.28	4e-25
62- 10:	XP_020093549.1	evm.model.jcf7180002780879.20	0
62- 11:	XP_020112186.1	evm.model.jcf7180002780879.18	4e-27
62- 12:	XP_020102425.1	evm.model.jcf7180002780879.13	8e-37
62- 13:	XP_020092292.1	evm.model.jcf7180002780879.9	0
62- 14:	XP_020082346.1	evm.model.jcf7180002780879.5	8e-26
62- 15:	XP_020096667.1	evm.model.jcf7180002780879.3	9e-168
## Alignment 63: score=270.0 e_value=9.9e-08 N=6 NC_033621.1&jcf7180002780879 minus
63- 0:	XP_020096726.1	evm.model.jcf7180002780879.253	4e-121
63- 1:	XP_020095369.1	evm.model.jcf7180002780879.250	2e-93
63- 2:	XP_020088042.1	evm.model.jcf7180002780879.245	3e-107
63- 3:	XP_020094047.1	evm.model.jcf7180002780879.242	2e-161
63- 4:	XP_020102367.1	evm.model.jcf7180002780879.239	0
63- 5:	XP_020086938.1	evm.model.jcf7180002780879.234	2e-83
## Alignment 64: score=408.0 e_value=4.9e-19 N=9 NC_033621.1&jcf7180002781127 minus
64- 0:	XP_020087456.1	evm.model.jcf7180002781127.66	6e-53
64- 1:	XP_020087411.1	evm.model.jcf7180002781127.64	5e-144
64- 2:	XP_020089438.1	evm.model.jcf7180002781127.59	0
64- 3:	XP_020097984.1	evm.model.jcf7180002781127.52	2e-58
64- 4:	XP_020098092.1	evm.model.jcf7180002781127.50	7e-16
64- 5:	XP_020101274.1	evm.model.jcf7180002781127.47	1e-22
64- 6:	XP_020083116.1	evm.model.jcf7180002781127.43	7e-111
64- 7:	XP_020094429.1	evm.model.jcf7180002781127.42	9e-128
64- 8:	XP_020101928.1	evm.model.jcf7180002781127.8	8e-46
## Alignment 65: score=749.0 e_value=4e-42 N=16 NC_033621.1&jcf7180002781304 minus
65- 0:	XP_020096502.1	evm.model.jcf7180002781304.74	6e-92
65- 1:	XP_020084965.1	evm.model.jcf7180002781304.71	0
65- 2:	XP_020097901.1	evm.model.jcf7180002781304.70	0
65- 3:	XP_020095504.1	evm.model.jcf7180002781304.69	0
65- 4:	XP_020095518.1	evm.model.jcf7180002781304.68	1e-145
65- 5:	XP_020085266.1	evm.model.jcf7180002781304.55	4e-123
65- 6:	XP_020098787.1	evm.model.jcf7180002781304.53	4e-176
65- 7:	XP_020094836.1	evm.model.jcf7180002781304.50	0
65- 8:	XP_020094929.1	evm.model.jcf7180002781304.48	2e-31
65- 9:	XP_020103684.1	evm.model.jcf7180002781304.46	0
65- 10:	XP_020097568.1	evm.model.jcf7180002781304.44	0
65- 11:	XP_020106202.1	evm.model.jcf7180002781304.20	2e-61
65- 12:	XP_020083938.1	evm.model.jcf7180002781304.16	5e-69
65- 13:	XP_020080030.1	evm.model.jcf7180002781304.6	1e-88
65- 14:	XP_020085080.1	evm.model.jcf7180002781304.5	2e-20
65- 15:	XP_020080214.1	evm.model.jcf7180002781304.1	2e-90
## Alignment 66: score=455.0 e_value=2.7e-20 N=10 NC_033621.1&jcf7180002781306 minus
66- 0:	XP_020094047.1	evm.model.jcf7180002781306.82	6e-151
66- 1:	XP_020083801.1	evm.model.jcf7180002781306.69	0
66- 2:	XP_020083748.1	evm.model.jcf7180002781306.64	0
66- 3:	XP_020104409.1	evm.model.jcf7180002781306.45	0
66- 4:	XP_020099324.1	evm.model.jcf7180002781306.39	2e-21
66- 5:	XP_020094464.1	evm.model.jcf7180002781306.36	4e-113
66- 6:	XP_020092205.1	evm.model.jcf7180002781306.27	2e-126
66- 7:	XP_020102290.1	evm.model.jcf7180002781306.25	5e-101
66- 8:	XP_020093070.1	evm.model.jcf7180002781306.20	8e-20
66- 9:	XP_020100108.1	evm.model.jcf7180002781306.14	7e-17
## Alignment 67: score=322.0 e_value=1.2e-11 N=7 NC_033621.1&jcf7180002781308 plus
67- 0:	XP_020099237.1	evm.model.jcf7180002781308.197	6e-150
67- 1:	XP_020112300.1	evm.model.jcf7180002781308.198	1e-104
67- 2:	XP_020098400.1	evm.model.jcf7180002781308.202	0
67- 3:	XP_020101959.1	evm.model.jcf7180002781308.222	2e-41
67- 4:	XP_020084761.1	evm.model.jcf7180002781308.227	1e-60
67- 5:	XP_020093194.1	evm.model.jcf7180002781308.241	3e-40
67- 6:	XP_020094289.1	evm.model.jcf7180002781308.253	0
## Alignment 68: score=269.0 e_value=1.1e-10 N=6 NC_033621.1&jcf7180002781308 minus
68- 0:	XP_020089271.1	evm.model.jcf7180002781308.272	1e-76
68- 1:	XP_020089282.1	evm.model.jcf7180002781308.270	6e-45
68- 2:	XP_020093578.1	evm.model.jcf7180002781308.219	0
68- 3:	XP_020090585.1	evm.model.jcf7180002781308.212	2e-115
68- 4:	XP_020086626.1	evm.model.jcf7180002781308.211	2e-73
68- 5:	XP_020095082.1	evm.model.jcf7180002781308.202	0
## Alignment 69: score=673.0 e_value=3e-38 N=15 NC_033621.1&jcf7180002781327 minus
69- 0:	XP_020095279.1	evm.model.jcf7180002781327.423	0
69- 1:	XP_020098564.1	evm.model.jcf7180002781327.419	0
69- 2:	XP_020101032.1	evm.model.jcf7180002781327.416	8e-84
69- 3:	XP_020089677.1	evm.model.jcf7180002781327.411	0
69- 4:	XP_020099289.1	evm.model.jcf7180002781327.410	0
69- 5:	XP_020096242.1	evm.model.jcf7180002781327.402	5e-74
69- 6:	XP_020102787.1	evm.model.jcf7180002781327.401	7e-30
69- 7:	XP_020088059.1	evm.model.jcf7180002781327.394	1e-49
69- 8:	XP_020084557.1	evm.model.jcf7180002781327.393	1e-48
69- 9:	XP_020106250.1	evm.model.jcf7180002781327.386	0
69- 10:	XP_020082851.1	evm.model.jcf7180002781327.381	4e-58
69- 11:	XP_020100463.1	evm.model.jcf7180002781327.363	2e-103
69- 12:	XP_020090597.1	evm.model.jcf7180002781327.351	0
69- 13:	XP_020090678.1	evm.model.jcf7180002781327.350	1e-125
69- 14:	XP_020080433.1	evm.model.jcf7180002781327.330	2e-151
## Alignment 70: score=851.0 e_value=5.3e-51 N=19 NC_033621.1&jcf7180002781358 plus
70- 0:	XP_020084451.1	evm.model.jcf7180002781358.3	9e-99
70- 1:	XP_020102339.1	evm.model.jcf7180002781358.8	9e-34
70- 2:	XP_020091328.1	evm.model.jcf7180002781358.10	6e-111
70- 3:	XP_020106525.1	evm.model.jcf7180002781358.17	9e-100
70- 4:	XP_020098392.1	evm.model.jcf7180002781358.36	2e-147
70- 5:	XP_020101112.1	evm.model.jcf7180002781358.42	2e-113
70- 6:	XP_020085018.1	evm.model.jcf7180002781358.51	1e-57
70- 7:	XP_020093399.1	evm.model.jcf7180002781358.53	0
70- 8:	XP_020083354.1	evm.model.jcf7180002781358.61	8e-36
70- 9:	XP_020092942.1	evm.model.jcf7180002781358.70	0
70- 10:	XP_020092897.1	evm.model.jcf7180002781358.71	4e-69
70- 11:	XP_020092954.1	evm.model.jcf7180002781358.74	6e-27
70- 12:	XP_020092126.1	evm.model.jcf7180002781358.106	0
70- 13:	XP_020101189.1	evm.model.jcf7180002781358.115	2e-80
70- 14:	XP_020084492.1	evm.model.jcf7180002781358.119	6e-33
70- 15:	XP_020084700.1	evm.model.jcf7180002781358.137	2e-137
70- 16:	XP_020080118.1	evm.model.jcf7180002781358.142	0
70- 17:	XP_020101541.1	evm.model.jcf7180002781358.146	0
70- 18:	XP_020088125.1	evm.model.jcf7180002781358.151	2e-29
## Alignment 71: score=378.0 e_value=7.2e-16 N=8 NC_033621.1&jcf7180002781367 plus
71- 0:	XP_020097762.1	evm.model.jcf7180002781367.20	0
71- 1:	XP_020089157.1	evm.model.jcf7180002781367.32	5e-118
71- 2:	XP_020095678.1	evm.model.jcf7180002781367.43	0
71- 3:	XP_020093120.1	evm.model.jcf7180002781367.49	2e-110
71- 4:	XP_020093342.1	evm.model.jcf7180002781367.52	9e-27
71- 5:	XP_020093456.1	evm.model.jcf7180002781367.53	4e-42
71- 6:	XP_020098995.1	evm.model.jcf7180002781367.59	2e-177
71- 7:	XP_020098937.1	evm.model.jcf7180002781367.61	6e-38
## Alignment 72: score=289.0 e_value=1e-09 N=6 NC_033621.1&jcf7180002781367 plus
72- 0:	XP_020102269.1	evm.model.jcf7180002781367.74	2e-52
72- 1:	XP_020088630.1	evm.model.jcf7180002781367.78	6e-67
72- 2:	XP_020101635.1	evm.model.jcf7180002781367.89	1e-31
72- 3:	XP_020098082.1	evm.model.jcf7180002781367.90	0
72- 4:	XP_020103797.1	evm.model.jcf7180002781367.91	5e-28
72- 5:	XP_020092795.1	evm.model.jcf7180002781367.92	0
## Alignment 73: score=288.0 e_value=1.5e-08 N=6 NC_033621.1&jcf7180002781513 minus
73- 0:	XP_020096944.1	evm.model.jcf7180002781513.20	0
73- 1:	XP_020090478.1	evm.model.jcf7180002781513.19	6e-142
73- 2:	XP_020096906.1	evm.model.jcf7180002781513.14	0
73- 3:	XP_020101837.1	evm.model.jcf7180002781513.9	3e-152
73- 4:	XP_020099888.1	evm.model.jcf7180002781513.5	2e-114
73- 5:	XP_020105545.1	evm.model.jcf7180002781513.2	0
## Alignment 74: score=1400.0 e_value=2.1e-97 N=30 NC_033621.1&jcf7180002781536 plus
74- 0:	XP_020089121.1	evm.model.jcf7180002781536.16	0
74- 1:	XP_020086187.1	evm.model.jcf7180002781536.17	0
74- 2:	XP_020095120.1	evm.model.jcf7180002781536.20	9e-53
74- 3:	XP_020085287.1	evm.model.jcf7180002781536.25	1e-97
74- 4:	XP_020085312.1	evm.model.jcf7180002781536.29	0
74- 5:	XP_020085324.1	evm.model.jcf7180002781536.30	1e-86
74- 6:	XP_020093464.1	evm.model.jcf7180002781536.31	0
74- 7:	XP_020095946.1	evm.model.jcf7180002781536.37	4e-72
74- 8:	XP_020097834.1	evm.model.jcf7180002781536.38	0
74- 9:	XP_020102745.1	evm.model.jcf7180002781536.48	0
74- 10:	XP_020088563.1	evm.model.jcf7180002781536.58	0
74- 11:	XP_020088605.1	evm.model.jcf7180002781536.59	3e-41
74- 12:	XP_020093549.1	evm.model.jcf7180002781536.60	0
74- 13:	XP_020112186.1	evm.model.jcf7180002781536.61	7e-36
74- 14:	XP_020100101.1	evm.model.jcf7180002781536.65	0
74- 15:	XP_020102425.1	evm.model.jcf7180002781536.67	6e-51
74- 16:	XP_020092292.1	evm.model.jcf7180002781536.69	0
74- 17:	XP_020102820.1	evm.model.jcf7180002781536.71	0
74- 18:	XP_020082346.1	evm.model.jcf7180002781536.73	6e-24
74- 19:	XP_020095457.1	evm.model.jcf7180002781536.74	1e-127
74- 20:	XP_020096649.1	evm.model.jcf7180002781536.75	0
74- 21:	XP_020096667.1	evm.model.jcf7180002781536.76	8e-175
74- 22:	XP_020105894.1	evm.model.jcf7180002781536.79	1e-111
74- 23:	XP_020086090.1	evm.model.jcf7180002781536.80	1e-60
74- 24:	XP_020084393.1	evm.model.jcf7180002781536.85	2e-109
74- 25:	XP_020084413.1	evm.model.jcf7180002781536.86	4e-41
74- 26:	XP_020084433.1	evm.model.jcf7180002781536.90	4e-175
74- 27:	XP_020093808.1	evm.model.jcf7180002781536.91	1e-170
74- 28:	XP_020096790.1	evm.model.jcf7180002781536.97	7e-131
74- 29:	XP_020088781.1	evm.model.jcf7180002781536.99	0
## Alignment 75: score=690.0 e_value=8.6e-38 N=15 NC_033621.1&jcf7180002781591 minus
75- 0:	XP_020086201.1	evm.model.jcf7180002781591.115	1e-68
75- 1:	XP_020097393.1	evm.model.jcf7180002781591.112	7e-169
75- 2:	XP_020100361.1	evm.model.jcf7180002781591.104	5e-45
75- 3:	XP_020100078.1	evm.model.jcf7180002781591.99	0
75- 4:	XP_020088146.1	evm.model.jcf7180002781591.96	1e-78
75- 5:	XP_020095073.1	evm.model.jcf7180002781591.95	5e-42
75- 6:	XP_020102479.1	evm.model.jcf7180002781591.75	6e-30
75- 7:	XP_020089754.1	evm.model.jcf7180002781591.70	2e-120
75- 8:	XP_020096998.1	evm.model.jcf7180002781591.68	4e-103
75- 9:	XP_020105169.1	evm.model.jcf7180002781591.67	3e-53
75- 10:	XP_020114514.1	evm.model.jcf7180002781591.59	0
75- 11:	XP_020099682.1	evm.model.jcf7180002781591.39	3e-92
75- 12:	XP_020103649.1	evm.model.jcf7180002781591.36	0
75- 13:	XP_020087421.1	evm.model.jcf7180002781591.21	8e-08
75- 14:	XP_020093148.1	evm.model.jcf7180002781591.18	6e-70
## Alignment 76: score=929.0 e_value=1e-54 N=20 NC_033621.1&jcf7180002781633 minus
76- 0:	XP_020106514.1	evm.model.jcf7180002781633.409	2e-107
76- 1:	XP_020087528.1	evm.model.jcf7180002781633.405	2e-137
76- 2:	XP_020114133.1	evm.model.jcf7180002781633.401	2e-82
76- 3:	XP_020100119.1	evm.model.jcf7180002781633.399	2e-13
76- 4:	XP_020106626.1	evm.model.jcf7180002781633.393	3e-173
76- 5:	XP_020105696.1	evm.model.jcf7180002781633.391	6e-172
76- 6:	XP_020100054.1	evm.model.jcf7180002781633.386	1e-51
76- 7:	XP_020104621.1	evm.model.jcf7180002781633.381	2e-39
76- 8:	XP_020104609.1	evm.model.jcf7180002781633.380	8e-41
76- 9:	XP_020097815.1	evm.model.jcf7180002781633.376	2e-172
76- 10:	XP_020097097.1	evm.model.jcf7180002781633.373	2e-31
76- 11:	XP_020085843.1	evm.model.jcf7180002781633.360	6e-106
76- 12:	XP_020100758.1	evm.model.jcf7180002781633.357	8e-169
76- 13:	XP_020100574.1	evm.model.jcf7180002781633.352	0
76- 14:	XP_020083726.1	evm.model.jcf7180002781633.351	6e-38
76- 15:	XP_020105729.1	evm.model.jcf7180002781633.348	3e-159
76- 16:	XP_020093881.1	evm.model.jcf7180002781633.346	5e-159
76- 17:	XP_020095615.1	evm.model.jcf7180002781633.344	2e-166
76- 18:	XP_020085898.1	evm.model.jcf7180002781633.342	1e-100
76- 19:	XP_020091105.1	evm.model.jcf7180002781633.341	0
## Alignment 77: score=283.0 e_value=6e-09 N=6 NC_033621.1&jcf7180002781636 plus
77- 0:	XP_020092009.1	evm.model.jcf7180002781636.110	3e-96
77- 1:	XP_020089094.1	evm.model.jcf7180002781636.111	0
77- 2:	XP_020088256.1	evm.model.jcf7180002781636.112	0
77- 3:	XP_020097439.1	evm.model.jcf7180002781636.122	4e-13
77- 4:	XP_020100735.1	evm.model.jcf7180002781636.130	0
77- 5:	XP_020092460.1	evm.model.jcf7180002781636.142	9e-125
## Alignment 78: score=539.0 e_value=6.3e-28 N=12 NC_033621.1&jcf7180002781636 minus
78- 0:	XP_020106156.1	evm.model.jcf7180002781636.106	3e-99
78- 1:	XP_020100681.1	evm.model.jcf7180002781636.71	0
78- 2:	XP_020093925.1	evm.model.jcf7180002781636.70	0
78- 3:	XP_020085473.1	evm.model.jcf7180002781636.64	9e-85
78- 4:	XP_020106681.1	evm.model.jcf7180002781636.48	0
78- 5:	XP_020101500.1	evm.model.jcf7180002781636.47	8e-146
78- 6:	XP_020096634.1	evm.model.jcf7180002781636.45	9e-96
78- 7:	XP_020090397.1	evm.model.jcf7180002781636.31	2e-35
78- 8:	XP_020099954.1	evm.model.jcf7180002781636.17	1e-60
78- 9:	XP_020086653.1	evm.model.jcf7180002781636.9	3e-38
78- 10:	XP_020103695.1	evm.model.jcf7180002781636.7	9e-102
78- 11:	XP_020103714.1	evm.model.jcf7180002781636.3	3e-33
## Alignment 79: score=486.0 e_value=2.9e-24 N=11 NC_033621.1&jcf7180002781650 minus
79- 0:	XP_020084317.1	evm.model.jcf7180002781650.56	4e-101
79- 1:	XP_020096489.1	evm.model.jcf7180002781650.51	0
79- 2:	XP_020095504.1	evm.model.jcf7180002781650.41	0
79- 3:	XP_020095518.1	evm.model.jcf7180002781650.40	5e-111
79- 4:	XP_020099199.1	evm.model.jcf7180002781650.39	2e-95
79- 5:	XP_020085266.1	evm.model.jcf7180002781650.36	0
79- 6:	XP_020094929.1	evm.model.jcf7180002781650.27	3e-16
79- 7:	XP_020094180.1	evm.model.jcf7180002781650.24	2e-52
79- 8:	XP_020084740.1	evm.model.jcf7180002781650.15	0
79- 9:	XP_020097782.1	evm.model.jcf7180002781650.14	1e-164
79- 10:	XP_020090923.1	evm.model.jcf7180002781650.8	1e-54
## Alignment 80: score=275.0 e_value=3.3e-08 N=6 NC_033621.1&jcf7180002781680 minus
80- 0:	XP_020097191.1	evm.model.jcf7180002781680.56	0
80- 1:	XP_020083698.1	evm.model.jcf7180002781680.53	8e-62
80- 2:	XP_020094611.1	evm.model.jcf7180002781680.51	0
80- 3:	XP_020102218.1	evm.model.jcf7180002781680.44	0
80- 4:	XP_020086286.1	evm.model.jcf7180002781680.23	2e-19
80- 5:	XP_020101525.1	evm.model.jcf7180002781680.11	7e-156
## Alignment 81: score=279.0 e_value=6.1e-08 N=6 NC_033621.1&jcf7180002781718 plus
81- 0:	XP_020085136.1	evm.model.jcf7180002781718.484	6e-156
81- 1:	XP_020095149.1	evm.model.jcf7180002781718.486	4e-158
81- 2:	XP_020103250.1	evm.model.jcf7180002781718.491	0
81- 3:	XP_020101298.1	evm.model.jcf7180002781718.498	1e-28
81- 4:	XP_020084251.1	evm.model.jcf7180002781718.503	0
81- 5:	XP_020101102.1	evm.model.jcf7180002781718.510	3e-08
## Alignment 82: score=542.0 e_value=2.6e-26 N=12 NC_033621.1&jcf7180002781730 plus
82- 0:	XP_020100016.1	evm.model.jcf7180002781730.1	2e-48
82- 1:	XP_020083212.1	evm.model.jcf7180002781730.36	2e-121
82- 2:	XP_020101431.1	evm.model.jcf7180002781730.48	3
82- 3:	XP_020104941.1	evm.model.jcf7180002781730.49	0
82- 4:	XP_020106076.1	evm.model.jcf7180002781730.52	1e-71
82- 5:	XP_020087120.1	evm.model.jcf7180002781730.68	8e-33
82- 6:	XP_020093649.1	evm.model.jcf7180002781730.74	0
82- 7:	XP_020113605.1	evm.model.jcf7180002781730.80	7e-137
82- 8:	XP_020090490.1	evm.model.jcf7180002781730.81	0
82- 9:	XP_020093839.1	evm.model.jcf7180002781730.86	0
82- 10:	XP_020091843.1	evm.model.jcf7180002781730.97	0
82- 11:	XP_020092770.1	evm.model.jcf7180002781730.121	4e-55
## Alignment 83: score=332.0 e_value=6.7e-11 N=7 NC_033622.1&jcf7180002712448 plus
83- 0:	XP_020108888.1	evm.model.jcf7180002712448.4	5e-71
83- 1:	XP_020083244.1	evm.model.jcf7180002712448.6	0
83- 2:	XP_020083548.1	evm.model.jcf7180002712448.8	8e-126
83- 3:	XP_020111455.1	evm.model.jcf7180002712448.29	0
83- 4:	XP_020106929.1	evm.model.jcf7180002712448.37	1e-128
83- 5:	XP_020082854.1	evm.model.jcf7180002712448.41	0
83- 6:	XP_020081689.1	evm.model.jcf7180002712448.45	2e-88
## Alignment 84: score=250.0 e_value=1.1e-10 N=6 NC_033622.1&jcf7180002712448 minus
84- 0:	XP_020083080.1	evm.model.jcf7180002712448.92	3e-87
84- 1:	XP_020109461.1	evm.model.jcf7180002712448.87	7e-88
84- 2:	XP_020083171.1	evm.model.jcf7180002712448.77	2e-21
84- 3:	XP_020081867.1	evm.model.jcf7180002712448.68	1e-54
84- 4:	XP_020081848.1	evm.model.jcf7180002712448.66	0
84- 5:	XP_020083265.1	evm.model.jcf7180002712448.21	4e-09
## Alignment 85: score=455.0 e_value=1.8e-21 N=10 NC_033622.1&jcf7180002727771 minus
85- 0:	XP_020109911.1	evm.model.jcf7180002727771.82	6e-98
85- 1:	XP_020082845.1	evm.model.jcf7180002727771.74	2e-35
85- 2:	XP_020113637.1	evm.model.jcf7180002727771.72	1e-32
85- 3:	XP_020111009.1	evm.model.jcf7180002727771.68	1e-158
85- 4:	XP_020083166.1	evm.model.jcf7180002727771.60	3e-171
85- 5:	XP_020083516.1	evm.model.jcf7180002727771.43	5e-57
85- 6:	XP_020082460.1	evm.model.jcf7180002727771.42	2e-125
85- 7:	XP_020082450.1	evm.model.jcf7180002727771.41	1e-20
85- 8:	XP_020107990.1	evm.model.jcf7180002727771.27	2e-155
85- 9:	XP_020083073.1	evm.model.jcf7180002727771.25	9e-104
## Alignment 86: score=424.0 e_value=6e-17 N=9 NC_033622.1&jcf7180002757850 minus
86- 0:	XP_020110892.1	evm.model.jcf7180002757850.120	0
86- 1:	XP_020107477.1	evm.model.jcf7180002757850.116	0
86- 2:	XP_020107524.1	evm.model.jcf7180002757850.113	2e-24
86- 3:	XP_020107502.1	evm.model.jcf7180002757850.112	1e-99
86- 4:	XP_020114277.1	evm.model.jcf7180002757850.103	5e-38
86- 5:	XP_020081512.1	evm.model.jcf7180002757850.101	2e-116
86- 6:	XP_020081531.1	evm.model.jcf7180002757850.96	3e-118
86- 7:	XP_020080106.1	evm.model.jcf7180002757850.91	6e-106
86- 8:	XP_020083303.1	evm.model.jcf7180002757850.84	5e-10
## Alignment 87: score=391.0 e_value=1.5e-16 N=9 NC_033622.1&jcf7180002757881 minus
87- 0:	XP_020079766.1	evm.model.jcf7180002757881.53	0
87- 1:	XP_020109384.1	evm.model.jcf7180002757881.47	3e-49
87- 2:	XP_020080626.1	evm.model.jcf7180002757881.40	1e-102
87- 3:	XP_020082966.1	evm.model.jcf7180002757881.32	9e-126
87- 4:	XP_020114576.1	evm.model.jcf7180002757881.23	3e-160
87- 5:	XP_020108523.1	evm.model.jcf7180002757881.11	0
87- 6:	XP_020110803.1	evm.model.jcf7180002757881.6	4e-107
87- 7:	XP_020114589.1	evm.model.jcf7180002757881.3	0
87- 8:	XP_020082974.1	evm.model.jcf7180002757881.1	2e-159
## Alignment 88: score=1003.0 e_value=4.3e-61 N=22 NC_033622.1&jcf7180002757905 minus
88- 0:	XP_020083198.1	evm.model.jcf7180002757905.102	0
88- 1:	XP_020082932.1	evm.model.jcf7180002757905.93	0
88- 2:	XP_020082934.1	evm.model.jcf7180002757905.86	3e-100
88- 3:	XP_020108395.1	evm.model.jcf7180002757905.80	4e-60
88- 4:	XP_020083135.1	evm.model.jcf7180002757905.78	5e-05
88- 5:	XP_020083330.1	evm.model.jcf7180002757905.74	0
88- 6:	XP_020110279.1	evm.model.jcf7180002757905.73	0
88- 7:	XP_020110431.1	evm.model.jcf7180002757905.67	0
88- 8:	XP_020109827.1	evm.model.jcf7180002757905.61	0
88- 9:	XP_020083574.1	evm.model.jcf7180002757905.54	4e-43
88- 10:	XP_020083327.1	evm.model.jcf7180002757905.53	1e-134
88- 11:	XP_020114170.1	evm.model.jcf7180002757905.48	8e-71
88- 12:	XP_020083088.1	evm.model.jcf7180002757905.41	0
88- 13:	XP_020108834.1	evm.model.jcf7180002757905.38	2e-39
88- 14:	XP_020083375.1	evm.model.jcf7180002757905.29	1e-21
88- 15:	XP_020109632.1	evm.model.jcf7180002757905.26	2e-147
88- 16:	XP_020080898.1	evm.model.jcf7180002757905.24	1e-148
88- 17:	XP_020083102.1	evm.model.jcf7180002757905.14	2e-151
88- 18:	XP_020081670.1	evm.model.jcf7180002757905.11	0
88- 19:	XP_020083197.1	evm.model.jcf7180002757905.9	2e-119
88- 20:	XP_020109494.1	evm.model.jcf7180002757905.7	0
88- 21:	XP_020083185.1	evm.model.jcf7180002757905.2	1e-92
## Alignment 89: score=331.0 e_value=1.2e-12 N=7 NC_033622.1&jcf7180002757955 minus
89- 0:	XP_020114632.1	evm.model.jcf7180002757955.33	2e-10
89- 1:	XP_020083516.1	evm.model.jcf7180002757955.30	6e-58
89- 2:	XP_020082460.1	evm.model.jcf7180002757955.29	5e-145
89- 3:	XP_020082450.1	evm.model.jcf7180002757955.28	6e-24
89- 4:	XP_020107990.1	evm.model.jcf7180002757955.17	2e-149
89- 5:	XP_020110571.1	evm.model.jcf7180002757955.6	4e-112
89- 6:	XP_020110585.1	evm.model.jcf7180002757955.5	9e-76
## Alignment 90: score=559.0 e_value=1.7e-26 N=12 NC_033622.1&jcf7180002757963 plus
90- 0:	XP_020079697.1	evm.model.jcf7180002757963.11	5e-84
90- 1:	XP_020111981.1	evm.model.jcf7180002757963.22	9e-56
90- 2:	XP_020107186.1	evm.model.jcf7180002757963.27	4e-65
90- 3:	XP_020106979.1	evm.model.jcf7180002757963.28	0
90- 4:	XP_020107217.1	evm.model.jcf7180002757963.30	1e-68
90- 5:	XP_020107238.1	evm.model.jcf7180002757963.31	2e-44
90- 6:	XP_020110892.1	evm.model.jcf7180002757963.40	1e-67
90- 7:	XP_020107477.1	evm.model.jcf7180002757963.50	0
90- 8:	XP_020107524.1	evm.model.jcf7180002757963.54	2e-160
90- 9:	XP_020107502.1	evm.model.jcf7180002757963.55	5e-89
90- 10:	XP_020107488.1	evm.model.jcf7180002757963.56	0
90- 11:	XP_020114277.1	evm.model.jcf7180002757963.62	4e-18
## Alignment 91: score=348.0 e_value=4.6e-15 N=8 NC_033622.1&jcf7180002758006 plus
91- 0:	XP_020082673.1	evm.model.jcf7180002758006.2	7e-108
91- 1:	XP_020111679.1	evm.model.jcf7180002758006.8	3e-83
91- 2:	XP_020111619.1	evm.model.jcf7180002758006.9	2e-165
91- 3:	XP_020114245.1	evm.model.jcf7180002758006.10	3e-160
91- 4:	XP_020111608.1	evm.model.jcf7180002758006.17	7e-173
91- 5:	XP_020081117.1	evm.model.jcf7180002758006.20	1e-166
91- 6:	XP_020083186.1	evm.model.jcf7180002758006.23	4e-90
91- 7:	XP_020114268.1	evm.model.jcf7180002758006.30	1e-77
## Alignment 92: score=1076.0 e_value=3.3e-76 N=24 NC_033622.1&jcf7180002758006 minus
92- 0:	XP_020082943.1	evm.model.jcf7180002758006.140	3e-25
92- 1:	XP_020110711.1	evm.model.jcf7180002758006.139	4e-72
92- 2:	XP_020110431.1	evm.model.jcf7180002758006.137	0
92- 3:	XP_020109837.1	evm.model.jcf7180002758006.136	0
92- 4:	XP_020109850.1	evm.model.jcf7180002758006.134	9e-14
92- 5:	XP_020108834.1	evm.model.jcf7180002758006.105	3e-64
92- 6:	XP_020082982.1	evm.model.jcf7180002758006.104	7e-108
92- 7:	XP_020080287.1	evm.model.jcf7180002758006.101	2e-08
92- 8:	XP_020109632.1	evm.model.jcf7180002758006.98	4e-96
92- 9:	XP_020083055.1	evm.model.jcf7180002758006.96	0
92- 10:	XP_020083102.1	evm.model.jcf7180002758006.95	0
92- 11:	XP_020083562.1	evm.model.jcf7180002758006.94	0
92- 12:	XP_020083306.1	evm.model.jcf7180002758006.93	2e-180
92- 13:	XP_020083308.1	evm.model.jcf7180002758006.92	0
92- 14:	XP_020081649.1	evm.model.jcf7180002758006.91	0
92- 15:	XP_020081656.1	evm.model.jcf7180002758006.90	1e-151
92- 16:	XP_020109687.1	evm.model.jcf7180002758006.66	0
92- 17:	XP_020083168.1	evm.model.jcf7180002758006.49	0
92- 18:	XP_020114215.1	evm.model.jcf7180002758006.44	2e-15
92- 19:	XP_020081752.1	evm.model.jcf7180002758006.40	0
92- 20:	XP_020083242.1	evm.model.jcf7180002758006.37	0
92- 21:	XP_020082504.1	evm.model.jcf7180002758006.36	2e-31
92- 22:	XP_020082616.1	evm.model.jcf7180002758006.33	2e-96
92- 23:	XP_020082673.1	evm.model.jcf7180002758006.2	7e-108
## Alignment 93: score=778.0 e_value=3.4e-46 N=17 NC_033622.1&jcf7180002758047 minus
93- 0:	XP_020081812.1	evm.model.jcf7180002758047.93	5e-54
93- 1:	XP_020083462.1	evm.model.jcf7180002758047.76	1e-121
93- 2:	XP_020081462.1	evm.model.jcf7180002758047.74	0
93- 3:	XP_020083210.1	evm.model.jcf7180002758047.70	3e-37
93- 4:	XP_020108627.1	evm.model.jcf7180002758047.68	2e-36
93- 5:	XP_020108023.1	evm.model.jcf7180002758047.58	6e-52
93- 6:	XP_020107568.1	evm.model.jcf7180002758047.56	1e-58
93- 7:	XP_020083040.1	evm.model.jcf7180002758047.48	0
93- 8:	XP_020083289.1	evm.model.jcf7180002758047.42	0
93- 9:	XP_020083440.1	evm.model.jcf7180002758047.39	2e-115
93- 10:	XP_020107642.1	evm.model.jcf7180002758047.38	2e-64
93- 11:	XP_020082595.1	evm.model.jcf7180002758047.35	3e-120
93- 12:	XP_020110097.1	evm.model.jcf7180002758047.33	0
93- 13:	XP_020109384.1	evm.model.jcf7180002758047.21	6e-50
93- 14:	XP_020080608.1	evm.model.jcf7180002758047.17	6e-50
93- 15:	XP_020080626.1	evm.model.jcf7180002758047.13	1e-95
93- 16:	XP_020080602.1	evm.model.jcf7180002758047.12	0
## Alignment 94: score=342.0 e_value=3.6e-12 N=7 NC_033622.1&jcf7180002758206 minus
94- 0:	XP_020112324.1	evm.model.jcf7180002758206.24	5e-40
94- 1:	XP_020112316.1	evm.model.jcf7180002758206.22	1e-93
94- 2:	XP_020112315.1	evm.model.jcf7180002758206.19	1e-65
94- 3:	XP_020112289.1	evm.model.jcf7180002758206.18	2e-42
94- 4:	XP_020112379.1	evm.model.jcf7180002758206.17	2e-35
94- 5:	XP_020082639.1	evm.model.jcf7180002758206.13	7e-64
94- 6:	XP_020082623.1	evm.model.jcf7180002758206.12	0
## Alignment 95: score=454.0 e_value=8.5e-20 N=10 NC_033622.1&jcf7180002759571 minus
95- 0:	XP_020109901.1	evm.model.jcf7180002759571.166	0
95- 1:	XP_020082849.1	evm.model.jcf7180002759571.135	3e-56
95- 2:	XP_020083300.1	evm.model.jcf7180002759571.131	2e-21
95- 3:	XP_020108231.1	evm.model.jcf7180002759571.126	2e-26
95- 4:	XP_020113550.1	evm.model.jcf7180002759571.125	3e-25
95- 5:	XP_020109678.1	evm.model.jcf7180002759571.114	0
95- 6:	XP_020082999.1	evm.model.jcf7180002759571.102	3e-69
95- 7:	XP_020111568.1	evm.model.jcf7180002759571.100	5e-93
95- 8:	XP_020083193.1	evm.model.jcf7180002759571.83	0
95- 9:	XP_020083247.1	evm.model.jcf7180002759571.68	1e-74
## Alignment 96: score=427.0 e_value=1.3e-17 N=9 NC_033622.1&jcf7180002766318 plus
96- 0:	XP_020080428.1	evm.model.jcf7180002766318.10	6e-141
96- 1:	XP_020083492.1	evm.model.jcf7180002766318.36	4e-106
96- 2:	XP_020083549.1	evm.model.jcf7180002766318.39	3e-32
96- 3:	XP_020111926.1	evm.model.jcf7180002766318.44	0
96- 4:	XP_020083512.1	evm.model.jcf7180002766318.65	5e-58
96- 5:	XP_020083529.1	evm.model.jcf7180002766318.69	2e-47
96- 6:	XP_020083030.1	evm.model.jcf7180002766318.71	6e-30
96- 7:	XP_020079684.1	evm.model.jcf7180002766318.92	1e-06
96- 8:	XP_020083023.1	evm.model.jcf7180002766318.94	0
## Alignment 97: score=269.0 e_value=4.5e-08 N=6 NC_033622.1&jcf7180002766324 plus
97- 0:	XP_020083236.1	evm.model.jcf7180002766324.218	0
97- 1:	XP_020083059.1	evm.model.jcf7180002766324.231	6e-142
97- 2:	XP_020114756.1	evm.model.jcf7180002766324.243	2e-24
97- 3:	XP_020083522.1	evm.model.jcf7180002766324.245	1e-144
97- 4:	XP_020082892.1	evm.model.jcf7180002766324.268	0
97- 5:	XP_020081371.1	evm.model.jcf7180002766324.278	0
## Alignment 98: score=366.0 e_value=2e-16 N=8 NC_033622.1&jcf7180002766357 plus
98- 0:	XP_020083111.1	evm.model.jcf7180002766357.242	4e-40
98- 1:	XP_020083501.1	evm.model.jcf7180002766357.256	6e-75
98- 2:	XP_020080520.1	evm.model.jcf7180002766357.257	0
98- 3:	XP_020080838.1	evm.model.jcf7180002766357.258	0
98- 4:	XP_020080850.1	evm.model.jcf7180002766357.260	5e-123
98- 5:	XP_020082788.1	evm.model.jcf7180002766357.266	4e-17
98- 6:	XP_020082722.1	evm.model.jcf7180002766357.268	0
98- 7:	XP_020082976.1	evm.model.jcf7180002766357.269	1e-154
## Alignment 99: score=1249.0 e_value=9.1e-82 N=27 NC_033622.1&jcf7180002766357 minus
99- 0:	XP_020083478.1	evm.model.jcf7180002766357.180	2e-25
99- 1:	XP_020083235.1	evm.model.jcf7180002766357.174	1e-107
99- 2:	XP_020083448.1	evm.model.jcf7180002766357.168	9e-137
99- 3:	XP_020083451.1	evm.model.jcf7180002766357.163	1e-39
99- 4:	XP_020083452.1	evm.model.jcf7180002766357.157	0
99- 5:	XP_020083457.1	evm.model.jcf7180002766357.154	7e-114
99- 6:	XP_020083486.1	evm.model.jcf7180002766357.151	1e-144
99- 7:	XP_020079719.1	evm.model.jcf7180002766357.146	0
99- 8:	XP_020111056.1	evm.model.jcf7180002766357.141	6e-31
99- 9:	XP_020109207.1	evm.model.jcf7180002766357.134	1e-124
99- 10:	XP_020083466.1	evm.model.jcf7180002766357.129	3e-59
99- 11:	XP_020083468.1	evm.model.jcf7180002766357.127	2e-20
99- 12:	XP_020083503.1	evm.model.jcf7180002766357.126	3e-167
99- 13:	XP_020080862.1	evm.model.jcf7180002766357.125	2e-146
99- 14:	XP_020083475.1	evm.model.jcf7180002766357.123	0
99- 15:	XP_020082879.1	evm.model.jcf7180002766357.121	4e-62
99- 16:	XP_020081877.1	evm.model.jcf7180002766357.115	0
99- 17:	XP_020083476.1	evm.model.jcf7180002766357.110	0
99- 18:	XP_020082252.1	evm.model.jcf7180002766357.108	0
99- 19:	XP_020083115.1	evm.model.jcf7180002766357.102	4e-163
99- 20:	XP_020110391.1	evm.model.jcf7180002766357.98	1e-84
99- 21:	XP_020083139.1	evm.model.jcf7180002766357.94	7e-58
99- 22:	XP_020107432.1	evm.model.jcf7180002766357.92	7e-58
99- 23:	XP_020109483.1	evm.model.jcf7180002766357.85	0
99- 24:	XP_020081200.1	evm.model.jcf7180002766357.81	1e-169
99- 25:	XP_020106919.1	evm.model.jcf7180002766357.76	5e-52
99- 26:	XP_020083304.1	evm.model.jcf7180002766357.69	0
## Alignment 100: score=552.0 e_value=4.1e-31 N=13 NC_033622.1&jcf7180002766357 minus
100- 0:	XP_020108657.1	evm.model.jcf7180002766357.318	4e-21
100- 1:	XP_020082912.1	evm.model.jcf7180002766357.317	6e-133
100- 2:	XP_020083331.1	evm.model.jcf7180002766357.305	0
100- 3:	XP_020083483.1	evm.model.jcf7180002766357.295	7e-167
100- 4:	XP_020082869.1	evm.model.jcf7180002766357.293	2e-42
100- 5:	XP_020082872.1	evm.model.jcf7180002766357.292	2e-23
100- 6:	XP_020107316.1	evm.model.jcf7180002766357.289	0
100- 7:	XP_020107652.1	evm.model.jcf7180002766357.287	9e-30
100- 8:	XP_020081419.1	evm.model.jcf7180002766357.280	4e-111
100- 9:	XP_020082722.1	evm.model.jcf7180002766357.268	0
100- 10:	XP_020083274.1	evm.model.jcf7180002766357.248	0
100- 11:	XP_020083393.1	evm.model.jcf7180002766357.247	1e-55
100- 12:	XP_020083157.1	evm.model.jcf7180002766357.246	0
## Alignment 101: score=461.0 e_value=9.5e-24 N=11 NC_033622.1&jcf7180002766358 plus
101- 0:	XP_020107890.1	evm.model.jcf7180002766358.162	1e-41
101- 1:	XP_020081616.1	evm.model.jcf7180002766358.163	4e-125
101- 2:	XP_020082800.1	evm.model.jcf7180002766358.166	0
101- 3:	XP_020082968.1	evm.model.jcf7180002766358.173	3e-157
101- 4:	XP_020082843.1	evm.model.jcf7180002766358.178	2e-44
101- 5:	XP_020110646.1	evm.model.jcf7180002766358.180	1e-34
101- 6:	XP_020080643.1	evm.model.jcf7180002766358.182	4e-85
101- 7:	XP_020080637.1	evm.model.jcf7180002766358.184	0
101- 8:	XP_020083113.1	evm.model.jcf7180002766358.186	2e-94
101- 9:	XP_020083074.1	evm.model.jcf7180002766358.195	3e-96
101- 10:	XP_020083346.1	evm.model.jcf7180002766358.201	4e-89
## Alignment 102: score=351.0 e_value=2.7e-14 N=8 NC_033622.1&jcf7180002766358 plus
102- 0:	XP_020083305.1	evm.model.jcf7180002766358.130	3e-67
102- 1:	XP_020112172.1	evm.model.jcf7180002766358.134	6e-42
102- 2:	XP_020083560.1	evm.model.jcf7180002766358.135	3e-110
102- 3:	XP_020083551.1	evm.model.jcf7180002766358.138	4e-81
102- 4:	XP_020114318.1	evm.model.jcf7180002766358.142	2e-137
102- 5:	XP_020080760.1	evm.model.jcf7180002766358.144	5e-89
102- 6:	XP_020080946.1	evm.model.jcf7180002766358.153	5e-174
102- 7:	XP_020083300.1	evm.model.jcf7180002766358.154	2e-47
## Alignment 103: score=286.0 e_value=3.1e-08 N=6 NC_033622.1&jcf7180002766417 plus
103- 0:	XP_020080838.1	evm.model.jcf7180002766417.2	3e-28
103- 1:	XP_020080850.1	evm.model.jcf7180002766417.4	4e-137
103- 2:	XP_020082763.1	evm.model.jcf7180002766417.5	3e-15
103- 3:	XP_020082722.1	evm.model.jcf7180002766417.9	0
103- 4:	XP_020082976.1	evm.model.jcf7180002766417.10	5e-96
103- 5:	XP_020082842.1	evm.model.jcf7180002766417.13	3e-124
## Alignment 104: score=517.0 e_value=1.9e-28 N=12 NC_033622.1&jcf7180002766439 minus
104- 0:	XP_020083197.1	evm.model.jcf7180002766439.77	1e-123
104- 1:	XP_020083185.1	evm.model.jcf7180002766439.74	2e-89
104- 2:	XP_020083187.1	evm.model.jcf7180002766439.72	0
104- 3:	XP_020082967.1	evm.model.jcf7180002766439.67	3e-108
104- 4:	XP_020114947.1	evm.model.jcf7180002766439.65	0
104- 5:	XP_020083485.1	evm.model.jcf7180002766439.58	3e-88
104- 6:	XP_020114215.1	evm.model.jcf7180002766439.55	7e-19
104- 7:	XP_020083315.1	evm.model.jcf7180002766439.54	2e-15
104- 8:	XP_020083058.1	evm.model.jcf7180002766439.38	3e-116
104- 9:	XP_020112525.1	evm.model.jcf7180002766439.35	8e-77
104- 10:	XP_020111851.1	evm.model.jcf7180002766439.30	3e-76
104- 11:	XP_020111668.1	evm.model.jcf7180002766439.11	9e-127
## Alignment 105: score=453.0 e_value=1.1e-21 N=10 NC_033622.1&jcf7180002766439 minus
105- 0:	XP_020083330.1	evm.model.jcf7180002766439.114	0
105- 1:	XP_020110279.1	evm.model.jcf7180002766439.113	0
105- 2:	XP_020083327.1	evm.model.jcf7180002766439.104	5e-133
105- 3:	XP_020083290.1	evm.model.jcf7180002766439.102	2e-46
105- 4:	XP_020107042.1	evm.model.jcf7180002766439.101	3e-38
105- 5:	XP_020114170.1	evm.model.jcf7180002766439.98	5e-109
105- 6:	XP_020083088.1	evm.model.jcf7180002766439.94	0
105- 7:	XP_020108834.1	evm.model.jcf7180002766439.92	1e-38
105- 8:	XP_020109632.1	evm.model.jcf7180002766439.82	2e-137
105- 9:	XP_020080898.1	evm.model.jcf7180002766439.74	2e-85
## Alignment 106: score=356.0 e_value=2.4e-13 N=8 NC_033622.1&jcf7180002766498 plus
106- 0:	XP_020083451.1	evm.model.jcf7180002766498.14	4e-21
106- 1:	XP_020083474.1	evm.model.jcf7180002766498.18	0
106- 2:	XP_020107766.1	evm.model.jcf7180002766498.20	9e-96
106- 3:	XP_020080387.1	evm.model.jcf7180002766498.24	0
106- 4:	XP_020083461.1	evm.model.jcf7180002766498.26	1e-38
106- 5:	XP_020083468.1	evm.model.jcf7180002766498.31	2e-11
106- 6:	XP_020081877.1	evm.model.jcf7180002766498.38	0
106- 7:	XP_020110391.1	evm.model.jcf7180002766498.46	5e-119
## Alignment 107: score=314.0 e_value=3.7e-11 N=7 NC_033622.1&jcf7180002766592 minus
107- 0:	XP_020081964.1	evm.model.jcf7180002766592.83	0
107- 1:	XP_020081812.1	evm.model.jcf7180002766592.80	3e-51
107- 2:	XP_020113866.1	evm.model.jcf7180002766592.77	2e-71
107- 3:	XP_020107755.1	evm.model.jcf7180002766592.59	8e-148
107- 4:	XP_020111205.1	evm.model.jcf7180002766592.41	1e-100
107- 5:	XP_020081462.1	evm.model.jcf7180002766592.28	0
107- 6:	XP_020080528.1	evm.model.jcf7180002766592.20	0
## Alignment 108: score=359.0 e_value=7.6e-14 N=8 NC_033622.1&jcf7180002766611 plus
108- 0:	XP_020083281.1	evm.model.jcf7180002766611.2	1e-26
108- 1:	XP_020112087.1	evm.model.jcf7180002766611.7	2e-66
108- 2:	XP_020107698.1	evm.model.jcf7180002766611.9	8e-39
108- 3:	XP_020112266.1	evm.model.jcf7180002766611.16	1e-70
108- 4:	XP_020081087.1	evm.model.jcf7180002766611.18	0
108- 5:	XP_020081379.1	evm.model.jcf7180002766611.21	0
108- 6:	XP_020083538.1	evm.model.jcf7180002766611.23	2e-29
108- 7:	XP_020081051.1	evm.model.jcf7180002766611.38	1e-32
## Alignment 109: score=967.0 e_value=4.8e-60 N=21 NC_033622.1&jcf7180002766611 minus
109- 0:	XP_020082894.1	evm.model.jcf7180002766611.184	0
109- 1:	XP_020081798.1	evm.model.jcf7180002766611.172	1e-177
109- 2:	XP_020081810.1	evm.model.jcf7180002766611.170	2e-15
109- 3:	XP_020107755.1	evm.model.jcf7180002766611.157	9e-146
109- 4:	XP_020082655.1	evm.model.jcf7180002766611.156	0
109- 5:	XP_020107005.1	evm.model.jcf7180002766611.152	5e-42
109- 6:	XP_020080491.1	evm.model.jcf7180002766611.150	0
109- 7:	XP_020083435.1	evm.model.jcf7180002766611.148	9e-120
109- 8:	XP_020082193.1	evm.model.jcf7180002766611.134	0
109- 9:	XP_020083210.1	evm.model.jcf7180002766611.132	4e-42
109- 10:	XP_020083348.1	evm.model.jcf7180002766611.115	3e-180
109- 11:	XP_020113890.1	evm.model.jcf7180002766611.110	0
109- 12:	XP_020083020.1	evm.model.jcf7180002766611.109	5e-44
109- 13:	XP_020107909.1	evm.model.jcf7180002766611.106	6e-126
109- 14:	XP_020083440.1	evm.model.jcf7180002766611.103	1e-100
109- 15:	XP_020082606.1	evm.model.jcf7180002766611.99	2e-58
109- 16:	XP_020108408.1	evm.model.jcf7180002766611.91	5e-111
109- 17:	XP_020082255.1	evm.model.jcf7180002766611.88	0
109- 18:	XP_020083444.1	evm.model.jcf7180002766611.87	1e-98
109- 19:	XP_020110671.1	evm.model.jcf7180002766611.73	5e-121
109- 20:	XP_020082966.1	evm.model.jcf7180002766611.66	2e-129
## Alignment 110: score=358.0 e_value=1e-14 N=8 NC_033622.1&jcf7180002766692 minus
110- 0:	XP_020081005.1	evm.model.jcf7180002766692.131	0
110- 1:	XP_020112208.1	evm.model.jcf7180002766692.121	2e-81
110- 2:	XP_020110049.1	evm.model.jcf7180002766692.112	9e-80
110- 3:	XP_020082892.1	evm.model.jcf7180002766692.110	0
110- 4:	XP_020107031.1	evm.model.jcf7180002766692.109	7e-88
110- 5:	XP_020107116.1	evm.model.jcf7180002766692.97	3e-33
110- 6:	XP_020107076.1	evm.model.jcf7180002766692.94	0
110- 7:	XP_020108680.1	evm.model.jcf7180002766692.86	1e-14
## Alignment 111: score=354.0 e_value=2.8e-14 N=8 NC_033622.1&jcf7180002766692 minus
111- 0:	XP_020081312.1	evm.model.jcf7180002766692.70	4e-126
111- 1:	XP_020083080.1	evm.model.jcf7180002766692.60	6e-142
111- 2:	XP_020109461.1	evm.model.jcf7180002766692.51	1e-90
111- 3:	XP_020083171.1	evm.model.jcf7180002766692.36	1e-19
111- 4:	XP_020081867.1	evm.model.jcf7180002766692.22	1e-72
111- 5:	XP_020108927.1	evm.model.jcf7180002766692.15	6e-153
111- 6:	XP_020082041.1	evm.model.jcf7180002766692.13	0
111- 7:	XP_020110596.1	evm.model.jcf7180002766692.8	1e-98
## Alignment 112: score=360.0 e_value=1e-15 N=8 NC_033622.1&jcf7180002766702 minus
112- 0:	XP_020111350.1	evm.model.jcf7180002766702.60	6e-10
112- 1:	XP_020081005.1	evm.model.jcf7180002766702.52	0
112- 2:	XP_020083355.1	evm.model.jcf7180002766702.48	8e-72
112- 3:	XP_020083215.1	evm.model.jcf7180002766702.47	4e-30
112- 4:	XP_020112208.1	evm.model.jcf7180002766702.38	6e-16
112- 5:	XP_020114756.1	evm.model.jcf7180002766702.37	6e-27
112- 6:	XP_020106993.1	evm.model.jcf7180002766702.27	0
112- 7:	XP_020107031.1	evm.model.jcf7180002766702.25	7e-86
## Alignment 113: score=333.0 e_value=4.9e-13 N=8 NC_033622.1&jcf7180002766702 minus
113- 0:	XP_020113866.1	evm.model.jcf7180002766702.205	3e-64
113- 1:	XP_020107755.1	evm.model.jcf7180002766702.194	4e-149
113- 2:	XP_020111205.1	evm.model.jcf7180002766702.182	4e-106
113- 3:	XP_020081462.1	evm.model.jcf7180002766702.173	0
113- 4:	XP_020080554.1	evm.model.jcf7180002766702.158	4e-103
113- 5:	XP_020083329.1	evm.model.jcf7180002766702.139	3e-45
113- 6:	XP_020107909.1	evm.model.jcf7180002766702.135	4e-127
113- 7:	XP_020109384.1	evm.model.jcf7180002766702.124	9e-24
## Alignment 114: score=820.0 e_value=5.8e-47 N=18 NC_033622.1&jcf7180002766719 minus
114- 0:	XP_020109678.1	evm.model.jcf7180002766719.115	1e-36
114- 1:	XP_020082999.1	evm.model.jcf7180002766719.103	0
114- 2:	XP_020111568.1	evm.model.jcf7180002766719.100	2e-94
114- 3:	XP_020109275.1	evm.model.jcf7180002766719.94	5e-99
114- 4:	XP_020113575.1	evm.model.jcf7180002766719.87	7e-95
114- 5:	XP_020083193.1	evm.model.jcf7180002766719.83	1e-133
114- 6:	XP_020083247.1	evm.model.jcf7180002766719.74	0
114- 7:	XP_020080162.1	evm.model.jcf7180002766719.69	5e-111
114- 8:	XP_020083224.1	evm.model.jcf7180002766719.66	7e-95
114- 9:	XP_020083223.1	evm.model.jcf7180002766719.62	3e-130
114- 10:	XP_020115214.1	evm.model.jcf7180002766719.54	0
114- 11:	XP_020083076.1	evm.model.jcf7180002766719.48	1e-10
114- 12:	XP_020081616.1	evm.model.jcf7180002766719.43	0
114- 13:	XP_020081070.1	evm.model.jcf7180002766719.37	1e-94
114- 14:	XP_020107920.1	evm.model.jcf7180002766719.36	7e-67
114- 15:	XP_020109943.1	evm.model.jcf7180002766719.12	7e-79
114- 16:	XP_020081824.1	evm.model.jcf7180002766719.8	0
114- 17:	XP_020109297.1	evm.model.jcf7180002766719.1	9e-92
## Alignment 115: score=710.0 e_value=4.8e-37 N=15 NC_033622.1&jcf7180002766756 minus
115- 0:	XP_020109367.1	evm.model.jcf7180002766756.66	0
115- 1:	XP_020083020.1	evm.model.jcf7180002766756.63	2e-36
115- 2:	XP_020111091.1	evm.model.jcf7180002766756.60	1e-38
115- 3:	XP_020107909.1	evm.model.jcf7180002766756.58	9e-135
115- 4:	XP_020083440.1	evm.model.jcf7180002766756.54	4e-140
115- 5:	XP_020107642.1	evm.model.jcf7180002766756.53	3e-98
115- 6:	XP_020082606.1	evm.model.jcf7180002766756.49	1e-109
115- 7:	XP_020082595.1	evm.model.jcf7180002766756.48	2e-115
115- 8:	XP_020110074.1	evm.model.jcf7180002766756.44	0
115- 9:	XP_020082255.1	evm.model.jcf7180002766756.39	0
115- 10:	XP_020083444.1	evm.model.jcf7180002766756.38	4e-105
115- 11:	XP_020079766.1	evm.model.jcf7180002766756.30	0
115- 12:	XP_020110671.1	evm.model.jcf7180002766756.18	0
115- 13:	XP_020080626.1	evm.model.jcf7180002766756.15	3e-47
115- 14:	XP_020082966.1	evm.model.jcf7180002766756.7	3e-116
## Alignment 116: score=411.0 e_value=2.6e-16 N=9 NC_033622.1&jcf7180002766756 minus
116- 0:	XP_020109141.1	evm.model.jcf7180002766756.119	8e-153
116- 1:	XP_020083478.1	evm.model.jcf7180002766756.116	9e-28
116- 2:	XP_020082882.1	evm.model.jcf7180002766756.111	0
116- 3:	XP_020083235.1	evm.model.jcf7180002766756.106	3e-108
116- 4:	XP_020083449.1	evm.model.jcf7180002766756.104	0
116- 5:	XP_020083451.1	evm.model.jcf7180002766756.99	1e-29
116- 6:	XP_020083457.1	evm.model.jcf7180002766756.84	3e-113
116- 7:	XP_020083195.1	evm.model.jcf7180002766756.74	0
116- 8:	XP_020111056.1	evm.model.jcf7180002766756.71	1e-94
## Alignment 117: score=314.0 e_value=4e-11 N=7 NC_033622.1&jcf7180002767082 minus
117- 0:	XP_020109543.1	evm.model.jcf7180002767082.46	1e-54
117- 1:	XP_020109580.1	evm.model.jcf7180002767082.40	7e-06
117- 2:	XP_020081233.1	evm.model.jcf7180002767082.37	2e-33
117- 3:	XP_020082924.1	evm.model.jcf7180002767082.36	2e-47
117- 4:	XP_020083198.1	evm.model.jcf7180002767082.18	0
117- 5:	XP_020114918.1	evm.model.jcf7180002767082.11	3e-79
117- 6:	XP_020082932.1	evm.model.jcf7180002767082.10	0
## Alignment 118: score=1024.0 e_value=4.9e-66 N=22 NC_033622.1&jcf7180002767208 minus
118- 0:	XP_020082967.1	evm.model.jcf7180002767208.92	5e-39
118- 1:	XP_020114964.1	evm.model.jcf7180002767208.91	6e-168
118- 2:	XP_020114947.1	evm.model.jcf7180002767208.90	0
118- 3:	XP_020109700.1	evm.model.jcf7180002767208.88	5e-136
118- 4:	XP_020109712.1	evm.model.jcf7180002767208.87	2e-38
118- 5:	XP_020083563.1	evm.model.jcf7180002767208.76	0
118- 6:	XP_020083168.1	evm.model.jcf7180002767208.75	0
118- 7:	XP_020083485.1	evm.model.jcf7180002767208.74	9e-78
118- 8:	XP_020083421.1	evm.model.jcf7180002767208.67	2e-173
118- 9:	XP_020082616.1	evm.model.jcf7180002767208.63	0
118- 10:	XP_020108383.1	evm.model.jcf7180002767208.58	3e-96
118- 11:	XP_020082633.1	evm.model.jcf7180002767208.48	1e-99
118- 12:	XP_020083057.1	evm.model.jcf7180002767208.46	1e-73
118- 13:	XP_020083058.1	evm.model.jcf7180002767208.45	2e-90
118- 14:	XP_020112525.1	evm.model.jcf7180002767208.43	5e-125
118- 15:	XP_020082673.1	evm.model.jcf7180002767208.40	1e-116
118- 16:	XP_020082944.1	evm.model.jcf7180002767208.39	1e-58
118- 17:	XP_020111851.1	evm.model.jcf7180002767208.38	4e-116
118- 18:	XP_020082387.1	evm.model.jcf7180002767208.29	0
118- 19:	XP_020114245.1	evm.model.jcf7180002767208.18	0
118- 20:	XP_020111596.1	evm.model.jcf7180002767208.9	2e-66
118- 21:	XP_020108950.1	evm.model.jcf7180002767208.1	6e-37
## Alignment 119: score=565.0 e_value=1.7e-26 N=12 NC_033622.1&jcf7180002767226 minus
119- 0:	XP_020114802.1	evm.model.jcf7180002767226.71	2e-117
119- 1:	XP_020114837.1	evm.model.jcf7180002767226.67	0
119- 2:	XP_020082135.1	evm.model.jcf7180002767226.45	1e-136
119- 3:	XP_020082117.1	evm.model.jcf7180002767226.37	3e-127
119- 4:	XP_020109129.1	evm.model.jcf7180002767226.34	3e-110
119- 5:	XP_020115026.1	evm.model.jcf7180002767226.30	0
119- 6:	XP_020083176.1	evm.model.jcf7180002767226.26	8e-74
119- 7:	XP_020109568.1	evm.model.jcf7180002767226.23	0
119- 8:	XP_020109543.1	evm.model.jcf7180002767226.21	6e-52
119- 9:	XP_020109580.1	evm.model.jcf7180002767226.14	9e-19
119- 10:	XP_020081256.1	evm.model.jcf7180002767226.10	2e-113
119- 11:	XP_020081233.1	evm.model.jcf7180002767226.2	4e-73
## Alignment 120: score=732.0 e_value=2.6e-40 N=16 NC_033622.1&jcf7180002767464 minus
120- 0:	XP_020083420.1	evm.model.jcf7180002767464.172	6e-29
120- 1:	XP_020082974.1	evm.model.jcf7180002767464.157	2e-154
120- 2:	XP_020112616.1	evm.model.jcf7180002767464.152	2e-147
120- 3:	XP_020114885.1	evm.model.jcf7180002767464.136	0
120- 4:	XP_020082227.1	evm.model.jcf7180002767464.115	6e-75
120- 5:	XP_020083051.1	evm.model.jcf7180002767464.109	3e-90
120- 6:	XP_020113947.1	evm.model.jcf7180002767464.108	0
120- 7:	XP_020083154.1	evm.model.jcf7180002767464.103	2e-100
120- 8:	XP_020083152.1	evm.model.jcf7180002767464.101	3e-142
120- 9:	XP_020110548.1	evm.model.jcf7180002767464.87	5e-20
120- 10:	XP_020113962.1	evm.model.jcf7180002767464.63	2e-31
120- 11:	XP_020114411.1	evm.model.jcf7180002767464.49	3e-157
120- 12:	XP_020111389.1	evm.model.jcf7180002767464.46	0
120- 13:	XP_020113971.1	evm.model.jcf7180002767464.28	0.0006
120- 14:	XP_020083098.1	evm.model.jcf7180002767464.13	0
120- 15:	XP_020083095.1	evm.model.jcf7180002767464.9	0
## Alignment 121: score=268.0 e_value=3.3e-08 N=6 NC_033622.1&jcf7180002767603 minus
121- 0:	XP_020111608.1	evm.model.jcf7180002767603.52	7e-170
121- 1:	XP_020108950.1	evm.model.jcf7180002767603.44	6e-42
121- 2:	XP_020079697.1	evm.model.jcf7180002767603.37	3e-115
121- 3:	XP_020083361.1	evm.model.jcf7180002767603.36	0
121- 4:	XP_020111981.1	evm.model.jcf7180002767603.35	1e-48
121- 5:	XP_020107217.1	evm.model.jcf7180002767603.24	4e-17
## Alignment 122: score=326.0 e_value=2.5e-14 N=8 NC_033622.1&jcf7180002767626 plus
122- 0:	XP_020083074.1	evm.model.jcf7180002767626.6	2e-52
122- 1:	XP_020083346.1	evm.model.jcf7180002767626.12	2e-09
122- 2:	XP_020107066.1	evm.model.jcf7180002767626.27	4e-95
122- 3:	XP_020113772.1	evm.model.jcf7180002767626.28	1e-154
122- 4:	XP_020083144.1	evm.model.jcf7180002767626.31	1e-66
122- 5:	XP_020083360.1	evm.model.jcf7180002767626.43	7e-140
122- 6:	XP_020108281.1	evm.model.jcf7180002767626.44	2e-77
122- 7:	XP_020081760.1	evm.model.jcf7180002767626.48	0
## Alignment 123: score=308.0 e_value=1.5e-11 N=7 NC_033622.1&jcf7180002767653 minus
123- 0:	XP_020107055.1	evm.model.jcf7180002767653.40	7e-26
123- 1:	XP_020109297.1	evm.model.jcf7180002767653.38	3e-101
123- 2:	XP_020109911.1	evm.model.jcf7180002767653.33	1e-38
123- 3:	XP_020082844.1	evm.model.jcf7180002767653.28	2e-110
123- 4:	XP_020112224.1	evm.model.jcf7180002767653.27	5e-149
123- 5:	XP_020083194.1	evm.model.jcf7180002767653.14	6e-156
123- 6:	XP_020082445.1	evm.model.jcf7180002767653.9	0
## Alignment 124: score=283.0 e_value=1.4e-09 N=6 NC_033622.1&jcf7180002767746 plus
124- 0:	XP_020083459.1	evm.model.jcf7180002767746.30	4e-174
124- 1:	XP_020111350.1	evm.model.jcf7180002767746.34	0.05
124- 2:	XP_020083065.1	evm.model.jcf7180002767746.36	0
124- 3:	XP_020083161.1	evm.model.jcf7180002767746.39	6e-31
124- 4:	XP_020110314.1	evm.model.jcf7180002767746.44	6e-25
124- 5:	XP_020081005.1	evm.model.jcf7180002767746.45	0
## Alignment 125: score=471.0 e_value=4.1e-20 N=10 NC_033622.1&jcf7180002767922 minus
125- 0:	XP_020083172.1	evm.model.jcf7180002767922.61	5e-74
125- 1:	XP_020083222.1	evm.model.jcf7180002767922.57	8e-136
125- 2:	XP_020083599.1	evm.model.jcf7180002767922.42	9e-160
125- 3:	XP_020083144.1	evm.model.jcf7180002767922.39	6e-62
125- 4:	XP_020083162.1	evm.model.jcf7180002767922.33	4e-32
125- 5:	XP_020082877.1	evm.model.jcf7180002767922.21	4e-117
125- 6:	XP_020082875.1	evm.model.jcf7180002767922.20	2e-116
125- 7:	XP_020080352.1	evm.model.jcf7180002767922.19	0
125- 8:	XP_020083081.1	evm.model.jcf7180002767922.12	9e-47
125- 9:	XP_020081916.1	evm.model.jcf7180002767922.3	5e-53
## Alignment 126: score=343.0 e_value=5.7e-13 N=8 NC_033622.1&jcf7180002768005 minus
126- 0:	XP_020106965.1	evm.model.jcf7180002768005.58	1e-30
126- 1:	XP_020114728.1	evm.model.jcf7180002768005.52	0
126- 2:	XP_020083145.1	evm.model.jcf7180002768005.40	5e-32
126- 3:	XP_020083019.1	evm.model.jcf7180002768005.36	1e-42
126- 4:	XP_020114802.1	evm.model.jcf7180002768005.31	7e-144
126- 5:	XP_020114769.1	evm.model.jcf7180002768005.28	0
126- 6:	XP_020083176.1	evm.model.jcf7180002768005.20	1e-32
126- 7:	XP_020109596.1	evm.model.jcf7180002768005.14	9e-51
## Alignment 127: score=1267.0 e_value=5.7e-86 N=28 NC_033622.1&jcf7180002768508 plus
127- 0:	XP_020083168.1	evm.model.jcf7180002768508.83	0
127- 1:	XP_020083421.1	evm.model.jcf7180002768508.91	2e-149
127- 2:	XP_020083242.1	evm.model.jcf7180002768508.99	7e-28
127- 3:	XP_020082504.1	evm.model.jcf7180002768508.100	0
127- 4:	XP_020083328.1	evm.model.jcf7180002768508.101	0
127- 5:	XP_020082616.1	evm.model.jcf7180002768508.102	0
127- 6:	XP_020112324.1	evm.model.jcf7180002768508.105	4e-07
127- 7:	XP_020112315.1	evm.model.jcf7180002768508.107	2e-35
127- 8:	XP_020112379.1	evm.model.jcf7180002768508.108	1e-36
127- 9:	XP_020082633.1	evm.model.jcf7180002768508.110	1e-131
127- 10:	XP_020082639.1	evm.model.jcf7180002768508.114	4e-65
127- 11:	XP_020082623.1	evm.model.jcf7180002768508.115	0
127- 12:	XP_020082673.1	evm.model.jcf7180002768508.124	2e-121
127- 13:	XP_020082944.1	evm.model.jcf7180002768508.125	6e-36
127- 14:	XP_020080049.1	evm.model.jcf7180002768508.132	8e-179
127- 15:	XP_020111679.1	evm.model.jcf7180002768508.141	1e-86
127- 16:	XP_020111619.1	evm.model.jcf7180002768508.142	0
127- 17:	XP_020081117.1	evm.model.jcf7180002768508.147	4e-72
127- 18:	XP_020083186.1	evm.model.jcf7180002768508.152	3e-86
127- 19:	XP_020114268.1	evm.model.jcf7180002768508.155	5e-108
127- 20:	XP_020107940.1	evm.model.jcf7180002768508.158	2e-125
127- 21:	XP_020109019.1	evm.model.jcf7180002768508.160	1e-148
127- 22:	XP_020107488.1	evm.model.jcf7180002768508.163	0
127- 23:	XP_020081512.1	evm.model.jcf7180002768508.168	0
127- 24:	XP_020081526.1	evm.model.jcf7180002768508.171	3e-30
127- 25:	XP_020107298.1	evm.model.jcf7180002768508.172	1e-60
127- 26:	XP_020080257.1	evm.model.jcf7180002768508.177	3e-178
127- 27:	XP_020080269.1	evm.model.jcf7180002768508.181	1e-61
## Alignment 128: score=536.0 e_value=1.2e-25 N=12 NC_033622.1&jcf7180002768508 plus
128- 0:	XP_020082943.1	evm.model.jcf7180002768508.4	0
128- 1:	XP_020110711.1	evm.model.jcf7180002768508.7	5e-50
128- 2:	XP_020110431.1	evm.model.jcf7180002768508.9	0
128- 3:	XP_020109850.1	evm.model.jcf7180002768508.11	2e-59
128- 4:	XP_020083327.1	evm.model.jcf7180002768508.22	6e-115
128- 5:	XP_020109817.1	evm.model.jcf7180002768508.26	0
128- 6:	XP_020082979.1	evm.model.jcf7180002768508.29	2e-155
128- 7:	XP_020080287.1	evm.model.jcf7180002768508.33	2e-47
128- 8:	XP_020109632.1	evm.model.jcf7180002768508.35	1e-108
128- 9:	XP_020083055.1	evm.model.jcf7180002768508.37	2e-73
128- 10:	XP_020083102.1	evm.model.jcf7180002768508.38	1e-110
128- 11:	XP_020083562.1	evm.model.jcf7180002768508.39	6e-60
## Alignment 129: score=272.0 e_value=6.1e-10 N=6 NC_033622.1&jcf7180002768712 minus
129- 0:	XP_020107663.1	evm.model.jcf7180002768712.39	4e-05
129- 1:	XP_020083503.1	evm.model.jcf7180002768712.37	0
129- 2:	XP_020080870.1	evm.model.jcf7180002768712.35	2e-126
129- 3:	XP_020083471.1	evm.model.jcf7180002768712.33	1e-65
129- 4:	XP_020110391.1	evm.model.jcf7180002768712.17	5e-145
129- 5:	XP_020083139.1	evm.model.jcf7180002768712.10	2e-48
## Alignment 130: score=331.0 e_value=6.2e-11 N=7 NC_033622.1&jcf7180002771570 minus
130- 0:	XP_020082968.1	evm.model.jcf7180002771570.136	4e-152
130- 1:	XP_020108939.1	evm.model.jcf7180002771570.125	6e-91
130- 2:	XP_020081824.1	evm.model.jcf7180002771570.118	0
130- 3:	XP_020109307.1	evm.model.jcf7180002771570.113	5e-103
130- 4:	XP_020109297.1	evm.model.jcf7180002771570.105	2e-106
130- 5:	XP_020109911.1	evm.model.jcf7180002771570.99	1e-101
130- 6:	XP_020082845.1	evm.model.jcf7180002771570.88	6e-41
## Alignment 131: score=268.0 e_value=5.9e-12 N=6 NC_033622.1&jcf7180002779461 plus
131- 0:	XP_020112276.1	evm.model.jcf7180002779461.23	4e-77
131- 1:	XP_020083538.1	evm.model.jcf7180002779461.24	4e-36
131- 2:	XP_020083539.1	evm.model.jcf7180002779461.30	6e-28
131- 3:	XP_020083537.1	evm.model.jcf7180002779461.34	9e-05
131- 4:	XP_020083425.1	evm.model.jcf7180002779461.40	2e-123
131- 5:	XP_020111230.1	evm.model.jcf7180002779461.42	3e-141
## Alignment 132: score=462.0 e_value=5.6e-22 N=10 NC_033622.1&jcf7180002780617 minus
132- 0:	XP_020081877.1	evm.model.jcf7180002780617.73	0
132- 1:	XP_020110268.1	evm.model.jcf7180002780617.69	1e-156
132- 2:	XP_020083115.1	evm.model.jcf7180002780617.62	5e-168
132- 3:	XP_020083481.1	evm.model.jcf7180002780617.59	7e-72
132- 4:	XP_020110391.1	evm.model.jcf7180002780617.58	0
132- 5:	XP_020083139.1	evm.model.jcf7180002780617.56	9e-54
132- 6:	XP_020107432.1	evm.model.jcf7180002780617.55	2e-42
132- 7:	XP_020082321.1	evm.model.jcf7180002780617.52	1e-171
132- 8:	XP_020082929.1	evm.model.jcf7180002780617.51	8e-23
132- 9:	XP_020106919.1	evm.model.jcf7180002780617.38	2e-43
## Alignment 133: score=963.0 e_value=1.9e-60 N=21 NC_033622.1&jcf7180002780685 plus
133- 0:	XP_020083028.1	evm.model.jcf7180002780685.92	2e-169
133- 1:	XP_020082868.1	evm.model.jcf7180002780685.115	0
133- 2:	XP_020082869.1	evm.model.jcf7180002780685.116	5e-87
133- 3:	XP_020114977.1	evm.model.jcf7180002780685.122	0
133- 4:	XP_020083111.1	evm.model.jcf7180002780685.130	9e-46
133- 5:	XP_020082889.1	evm.model.jcf7180002780685.131	0
133- 6:	XP_020083391.1	evm.model.jcf7180002780685.134	7e-168
133- 7:	XP_020115071.1	evm.model.jcf7180002780685.135	2e-53
133- 8:	XP_020115083.1	evm.model.jcf7180002780685.138	4e-117
133- 9:	XP_020081410.1	evm.model.jcf7180002780685.145	5e-64
133- 10:	XP_020083132.1	evm.model.jcf7180002780685.150	2e-115
133- 11:	XP_020083501.1	evm.model.jcf7180002780685.151	2e-77
133- 12:	XP_020080520.1	evm.model.jcf7180002780685.152	4e-97
133- 13:	XP_020080838.1	evm.model.jcf7180002780685.157	0.0004
133- 14:	XP_020082749.1	evm.model.jcf7180002780685.161	1e-19
133- 15:	XP_020109922.1	evm.model.jcf7180002780685.168	6e-25
133- 16:	XP_020082976.1	evm.model.jcf7180002780685.170	1e-171
133- 17:	XP_020082977.1	evm.model.jcf7180002780685.171	4e-78
133- 18:	XP_020112637.1	evm.model.jcf7180002780685.178	2e-164
133- 19:	XP_020114858.1	evm.model.jcf7180002780685.180	0
133- 20:	XP_020083286.1	evm.model.jcf7180002780685.195	1e-59
## Alignment 134: score=401.0 e_value=1.3e-16 N=9 NC_033622.1&jcf7180002780685 plus
134- 0:	XP_020111981.1	evm.model.jcf7180002780685.22	4e-40
134- 1:	XP_020107940.1	evm.model.jcf7180002780685.25	5e-142
134- 2:	XP_020107488.1	evm.model.jcf7180002780685.32	0
134- 3:	XP_020081512.1	evm.model.jcf7180002780685.36	0
134- 4:	XP_020081526.1	evm.model.jcf7180002780685.39	5e-114
134- 5:	XP_020107298.1	evm.model.jcf7180002780685.41	5e-68
134- 6:	XP_020080064.1	evm.model.jcf7180002780685.47	0
134- 7:	XP_020080257.1	evm.model.jcf7180002780685.48	4e-145
134- 8:	XP_020080269.1	evm.model.jcf7180002780685.52	1e-88
## Alignment 135: score=362.0 e_value=5e-16 N=9 NC_033622.1&jcf7180002780879 minus
135- 0:	XP_020080234.1	evm.model.jcf7180002780879.316	0
135- 1:	XP_020080173.1	evm.model.jcf7180002780879.309	0
135- 2:	XP_020083484.1	evm.model.jcf7180002780879.300	0
135- 3:	XP_020082869.1	evm.model.jcf7180002780879.296	6e-123
135- 4:	XP_020083340.1	evm.model.jcf7180002780879.293	1e-54
135- 5:	XP_020115051.1	evm.model.jcf7180002780879.285	0
135- 6:	XP_020081410.1	evm.model.jcf7180002780879.281	3e-161
135- 7:	XP_020082762.1	evm.model.jcf7180002780879.270	0
135- 8:	XP_020112627.1	evm.model.jcf7180002780879.262	3e-158
## Alignment 136: score=272.0 e_value=1.6e-08 N=6 NC_033622.1&jcf7180002780879 minus
136- 0:	XP_020111950.1	evm.model.jcf7180002780879.351	0
136- 1:	XP_020110892.1	evm.model.jcf7180002780879.342	5e-17
136- 2:	XP_020107468.1	evm.model.jcf7180002780879.339	5e-143
136- 3:	XP_020107502.1	evm.model.jcf7180002780879.335	1e-92
136- 4:	XP_020081512.1	evm.model.jcf7180002780879.327	0
136- 5:	XP_020081526.1	evm.model.jcf7180002780879.325	9e-26
## Alignment 137: score=340.0 e_value=5.7e-16 N=8 NC_033622.1&jcf7180002781123 plus
137- 0:	XP_020109733.1	evm.model.jcf7180002781123.113	8e-60
137- 1:	XP_020113689.1	evm.model.jcf7180002781123.122	3e-144
137- 2:	XP_020114397.1	evm.model.jcf7180002781123.142	4e-18
137- 3:	XP_020080352.1	evm.model.jcf7180002781123.151	0
137- 4:	XP_020083081.1	evm.model.jcf7180002781123.156	4e-38
137- 5:	XP_020113813.1	evm.model.jcf7180002781123.157	7e-12
137- 6:	XP_020081885.1	evm.model.jcf7180002781123.160	0
137- 7:	XP_020082086.1	evm.model.jcf7180002781123.179	0
## Alignment 138: score=483.0 e_value=1.9e-20 N=10 NC_033622.1&jcf7180002781215 plus
138- 0:	XP_020083039.1	evm.model.jcf7180002781215.61	0
138- 1:	XP_020083191.1	evm.model.jcf7180002781215.73	3e-159
138- 2:	XP_020110063.1	evm.model.jcf7180002781215.76	1e-38
138- 3:	XP_020110849.1	evm.model.jcf7180002781215.86	2e-72
138- 4:	XP_020110146.1	evm.model.jcf7180002781215.87	1e-153
138- 5:	XP_020082526.1	evm.model.jcf7180002781215.92	0
138- 6:	XP_020082888.1	evm.model.jcf7180002781215.99	1e-42
138- 7:	XP_020080421.1	evm.model.jcf7180002781215.101	8e-175
138- 8:	XP_020080428.1	evm.model.jcf7180002781215.117	4e-139
138- 9:	XP_020080409.1	evm.model.jcf7180002781215.121	4e-125
## Alignment 139: score=550.0 e_value=1.8e-26 N=12 NC_033622.1&jcf7180002781322 minus
139- 0:	XP_020082894.1	evm.model.jcf7180002781322.89	0
139- 1:	XP_020081798.1	evm.model.jcf7180002781322.82	3e-176
139- 2:	XP_020080986.1	evm.model.jcf7180002781322.68	0
139- 3:	XP_020107755.1	evm.model.jcf7180002781322.66	1e-144
139- 4:	XP_020082655.1	evm.model.jcf7180002781322.63	0
139- 5:	XP_020080491.1	evm.model.jcf7180002781322.53	0
139- 6:	XP_020083435.1	evm.model.jcf7180002781322.47	7e-132
139- 7:	XP_020111205.1	evm.model.jcf7180002781322.43	5e-58
139- 8:	XP_020083210.1	evm.model.jcf7180002781322.31	3e-42
139- 9:	XP_020108627.1	evm.model.jcf7180002781322.30	8e-22
139- 10:	XP_020083377.1	evm.model.jcf7180002781322.20	0
139- 11:	XP_020083348.1	evm.model.jcf7180002781322.6	1e-114
## Alignment 140: score=525.0 e_value=8e-26 N=12 NC_033622.1&jcf7180002781327 plus
140- 0:	XP_020110794.1	evm.model.jcf7180002781327.340	6e-49
140- 1:	XP_020111302.1	evm.model.jcf7180002781327.370	0
140- 2:	XP_020083154.1	evm.model.jcf7180002781327.384	7e-101
140- 3:	XP_020083209.1	evm.model.jcf7180002781327.394	3e-77
140- 4:	XP_020114422.1	evm.model.jcf7180002781327.406	2e-41
140- 5:	XP_020083143.1	evm.model.jcf7180002781327.409	5e-165
140- 6:	XP_020108888.1	evm.model.jcf7180002781327.421	4e-39
140- 7:	XP_020083244.1	evm.model.jcf7180002781327.423	0
140- 8:	XP_020083548.1	evm.model.jcf7180002781327.427	4e-173
140- 9:	XP_020111455.1	evm.model.jcf7180002781327.457	0
140- 10:	XP_020106929.1	evm.model.jcf7180002781327.469	8e-160
140- 11:	XP_020081689.1	evm.model.jcf7180002781327.481	4e-75
## Alignment 141: score=536.0 e_value=5e-26 N=12 NC_033622.1&jcf7180002781358 minus
141- 0:	XP_020113510.1	evm.model.jcf7180002781358.174	5e-123
141- 1:	XP_020115131.1	evm.model.jcf7180002781358.173	0
141- 2:	XP_020083257.1	evm.model.jcf7180002781358.162	3e-49
141- 3:	XP_020114334.1	evm.model.jcf7180002781358.156	3e-34
141- 4:	XP_020080968.1	evm.model.jcf7180002781358.148	2e-48
141- 5:	XP_020082848.1	evm.model.jcf7180002781358.144	0
141- 6:	XP_020083482.1	evm.model.jcf7180002781358.142	0
141- 7:	XP_020111568.1	evm.model.jcf7180002781358.138	2e-100
141- 8:	XP_020082918.1	evm.model.jcf7180002781358.133	6e-164
141- 9:	XP_020113562.1	evm.model.jcf7180002781358.131	1e-50
141- 10:	XP_020083224.1	evm.model.jcf7180002781358.124	2e-108
141- 11:	XP_020083223.1	evm.model.jcf7180002781358.120	0
## Alignment 142: score=392.0 e_value=5e-19 N=10 NC_033622.1&jcf7180002781358 minus
142- 0:	XP_020082970.1	evm.model.jcf7180002781358.105	8e-13
142- 1:	XP_020107055.1	evm.model.jcf7180002781358.98	2e-40
142- 2:	XP_020082844.1	evm.model.jcf7180002781358.89	1e-96
142- 3:	XP_020080637.1	evm.model.jcf7180002781358.87	3e-166
142- 4:	XP_020083194.1	evm.model.jcf7180002781358.75	2e-159
142- 5:	XP_020082445.1	evm.model.jcf7180002781358.70	0
142- 6:	XP_020081491.1	evm.model.jcf7180002781358.53	0
142- 7:	XP_020083599.1	evm.model.jcf7180002781358.36	7e-152
142- 8:	XP_020083081.1	evm.model.jcf7180002781358.20	6e-22
142- 9:	XP_020108281.1	evm.model.jcf7180002781358.13	1e-80
## Alignment 143: score=296.0 e_value=1.7e-12 N=7 NC_033622.1&jcf7180002781361 plus
143- 0:	XP_020082321.1	evm.model.jcf7180002781361.6	3e-64
143- 1:	XP_020081141.1	evm.model.jcf7180002781361.8	0
143- 2:	XP_020106919.1	evm.model.jcf7180002781361.13	6e-44
143- 3:	XP_020082165.1	evm.model.jcf7180002781361.17	0
143- 4:	XP_020110063.1	evm.model.jcf7180002781361.29	7e-84
143- 5:	XP_020082614.1	evm.model.jcf7180002781361.31	4e-171
143- 6:	XP_020080428.1	evm.model.jcf7180002781361.34	2e-166
## Alignment 144: score=333.0 e_value=4e-11 N=7 NC_033622.1&jcf7180002781395 minus
144- 0:	XP_020107568.1	evm.model.jcf7180002781395.25	2e-108
144- 1:	XP_020083296.1	evm.model.jcf7180002781395.19	2e-73
144- 2:	XP_020109344.1	evm.model.jcf7180002781395.13	0
144- 3:	XP_020083289.1	evm.model.jcf7180002781395.9	4e-84
144- 4:	XP_020083440.1	evm.model.jcf7180002781395.4	3e-104
144- 5:	XP_020107642.1	evm.model.jcf7180002781395.3	9e-154
144- 6:	XP_020082606.1	evm.model.jcf7180002781395.1	2e-89
## Alignment 145: score=326.0 e_value=1.3e-14 N=8 NC_033622.1&jcf7180002781542 minus
145- 0:	XP_020083149.1	evm.model.jcf7180002781542.243	6e-18
145- 1:	XP_020083478.1	evm.model.jcf7180002781542.239	1e-29
145- 2:	XP_020083160.1	evm.model.jcf7180002781542.226	1e-98
145- 3:	XP_020108134.1	evm.model.jcf7180002781542.225	1e-145
145- 4:	XP_020083451.1	evm.model.jcf7180002781542.215	5e-15
145- 5:	XP_020080870.1	evm.model.jcf7180002781542.198	1e-139
145- 6:	XP_020107601.1	evm.model.jcf7180002781542.178	3e-55
145- 7:	XP_020083139.1	evm.model.jcf7180002781542.174	5e-58
## Alignment 146: score=261.0 e_value=8.9e-09 N=6 NC_033622.1&jcf7180002781542 minus
146- 0:	XP_020080594.1	evm.model.jcf7180002781542.91	1e-98
146- 1:	XP_020083550.1	evm.model.jcf7180002781542.88	7e-108
146- 2:	XP_020083575.1	evm.model.jcf7180002781542.85	6e-26
146- 3:	XP_020079820.1	evm.model.jcf7180002781542.71	0
146- 4:	XP_020083067.1	evm.model.jcf7180002781542.66	0
146- 5:	XP_020083508.1	evm.model.jcf7180002781542.65	8e-147
## Alignment 147: score=257.0 e_value=1.5e-08 N=6 NC_033622.1&jcf7180002781542 minus
147- 0:	XP_020114371.1	evm.model.jcf7180002781542.162	1e-94
147- 1:	XP_020082510.1	evm.model.jcf7180002781542.151	2e-76
147- 2:	XP_020083504.1	evm.model.jcf7180002781542.140	4e-80
147- 3:	XP_020110063.1	evm.model.jcf7180002781542.134	4e-84
147- 4:	XP_020110146.1	evm.model.jcf7180002781542.128	4e-19
147- 5:	XP_020083199.1	evm.model.jcf7180002781542.123	7e-100
## Alignment 148: score=873.0 e_value=1.8e-50 N=19 NC_033622.1&jcf7180002781544 minus
148- 0:	XP_020082868.1	evm.model.jcf7180002781544.61	0
148- 1:	XP_020114977.1	evm.model.jcf7180002781544.59	0
148- 2:	XP_020083273.1	evm.model.jcf7180002781544.57	7e-30
148- 3:	XP_020082889.1	evm.model.jcf7180002781544.52	0
148- 4:	XP_020083391.1	evm.model.jcf7180002781544.51	0
148- 5:	XP_020115071.1	evm.model.jcf7180002781544.50	2e-146
148- 6:	XP_020115083.1	evm.model.jcf7180002781544.46	6e-34
148- 7:	XP_020108853.1	evm.model.jcf7180002781544.45	3e-44
148- 8:	XP_020082664.1	evm.model.jcf7180002781544.43	0
148- 9:	XP_020081410.1	evm.model.jcf7180002781544.40	1e-106
148- 10:	XP_020080520.1	evm.model.jcf7180002781544.36	0
148- 11:	XP_020082749.1	evm.model.jcf7180002781544.33	2e-114
148- 12:	XP_020109922.1	evm.model.jcf7180002781544.26	7e-12
148- 13:	XP_020082976.1	evm.model.jcf7180002781544.24	2e-72
148- 14:	XP_020082977.1	evm.model.jcf7180002781544.20	1e-39
148- 15:	XP_020112627.1	evm.model.jcf7180002781544.15	9e-179
148- 16:	XP_020112637.1	evm.model.jcf7180002781544.13	0
148- 17:	XP_020114858.1	evm.model.jcf7180002781544.12	0
148- 18:	XP_020083157.1	evm.model.jcf7180002781544.9	1e-122
## Alignment 149: score=368.0 e_value=5.2e-15 N=8 NC_033622.1&jcf7180002781556 minus
149- 0:	XP_020082970.1	evm.model.jcf7180002781556.30	4e-36
149- 1:	XP_020109943.1	evm.model.jcf7180002781556.28	2e-110
149- 2:	XP_020109911.1	evm.model.jcf7180002781556.26	5e-33
149- 3:	XP_020082844.1	evm.model.jcf7180002781556.25	4e-98
149- 4:	XP_020082845.1	evm.model.jcf7180002781556.22	4e-16
149- 5:	XP_020113637.1	evm.model.jcf7180002781556.21	4e-20
149- 6:	XP_020080637.1	evm.model.jcf7180002781556.20	0
149- 7:	XP_020083194.1	evm.model.jcf7180002781556.12	1e-156
## Alignment 150: score=798.0 e_value=5.6e-49 N=18 NC_033622.1&jcf7180002781609 minus
150- 0:	XP_020114745.1	evm.model.jcf7180002781609.256	0
150- 1:	XP_020083271.1	evm.model.jcf7180002781609.247	2e-13
150- 2:	XP_020082892.1	evm.model.jcf7180002781609.244	0
150- 3:	XP_020107031.1	evm.model.jcf7180002781609.242	6e-70
150- 4:	XP_020081371.1	evm.model.jcf7180002781609.241	2e-156
150- 5:	XP_020081540.1	evm.model.jcf7180002781609.240	0
150- 6:	XP_020083155.1	evm.model.jcf7180002781609.237	1e-90
150- 7:	XP_020107116.1	evm.model.jcf7180002781609.235	3e-51
150- 8:	XP_020113379.1	evm.model.jcf7180002781609.233	2e-37
150- 9:	XP_020108038.1	evm.model.jcf7180002781609.232	4e-18
150- 10:	XP_020083358.1	evm.model.jcf7180002781609.230	3e-154
150- 11:	XP_020081029.1	evm.model.jcf7180002781609.228	0
150- 12:	XP_020110371.1	evm.model.jcf7180002781609.222	2e-47
150- 13:	XP_020083385.1	evm.model.jcf7180002781609.217	5e-137
150- 14:	XP_020109461.1	evm.model.jcf7180002781609.207	7e-34
150- 15:	XP_020110511.1	evm.model.jcf7180002781609.201	2e-140
150- 16:	XP_020107145.1	evm.model.jcf7180002781609.183	2e-20
150- 17:	XP_020107134.1	evm.model.jcf7180002781609.182	7e-71
## Alignment 151: score=373.0 e_value=7.6e-14 N=8 NC_033622.1&jcf7180002781609 minus
151- 0:	XP_020082227.1	evm.model.jcf7180002781609.178	9e-103
151- 1:	XP_020083054.1	evm.model.jcf7180002781609.177	4e-127
151- 2:	XP_020107684.1	evm.model.jcf7180002781609.174	1e-13
151- 3:	XP_020114422.1	evm.model.jcf7180002781609.165	1e-82
151- 4:	XP_020114411.1	evm.model.jcf7180002781609.163	0
151- 5:	XP_020081549.1	evm.model.jcf7180002781609.158	0
151- 6:	XP_020083143.1	evm.model.jcf7180002781609.156	0
151- 7:	XP_020083244.1	evm.model.jcf7180002781609.151	0
## Alignment 152: score=606.0 e_value=3.6e-28 N=13 NC_033622.1&jcf7180002781636 plus
152- 0:	XP_020113509.1	evm.model.jcf7180002781636.146	6e-53
152- 1:	XP_020108570.1	evm.model.jcf7180002781636.155	1e-124
152- 2:	XP_020083547.1	evm.model.jcf7180002781636.159	3e-42
152- 3:	XP_020115095.1	evm.model.jcf7180002781636.166	6e-15
152- 4:	XP_020113522.1	evm.model.jcf7180002781636.179	4e-115
152- 5:	XP_020114318.1	evm.model.jcf7180002781636.184	6e-165
152- 6:	XP_020080760.1	evm.model.jcf7180002781636.188	1e-125
152- 7:	XP_020109469.1	evm.model.jcf7180002781636.197	1e-68
152- 8:	XP_020109901.1	evm.model.jcf7180002781636.203	0
152- 9:	XP_020080946.1	evm.model.jcf7180002781636.218	0
152- 10:	XP_020082849.1	evm.model.jcf7180002781636.222	7e-42
152- 11:	XP_020082853.1	evm.model.jcf7180002781636.226	7e-20
152- 12:	XP_020108231.1	evm.model.jcf7180002781636.239	9e-12
## Alignment 153: score=1073.0 e_value=1e-70 N=24 NC_033622.1&jcf7180002781679 minus
153- 0:	XP_020083016.1	evm.model.jcf7180002781679.243	2
153- 1:	XP_020083337.1	evm.model.jcf7180002781679.228	2e-50
153- 2:	XP_020114068.1	evm.model.jcf7180002781679.226	0
153- 3:	XP_020110400.1	evm.model.jcf7180002781679.224	0
153- 4:	XP_020081988.1	evm.model.jcf7180002781679.220	5e-33
153- 5:	XP_020114082.1	evm.model.jcf7180002781679.212	2e-33
153- 6:	XP_020082890.1	evm.model.jcf7180002781679.207	3e-67
153- 7:	XP_020114093.1	evm.model.jcf7180002781679.205	0
153- 8:	XP_020106965.1	evm.model.jcf7180002781679.187	3e-25
153- 9:	XP_020114728.1	evm.model.jcf7180002781679.182	0
153- 10:	XP_020114736.1	evm.model.jcf7180002781679.181	2e-127
153- 11:	XP_020083087.1	evm.model.jcf7180002781679.166	2e-43
153- 12:	XP_020114802.1	evm.model.jcf7180002781679.162	3e-145
153- 13:	XP_020114781.1	evm.model.jcf7180002781679.161	0
153- 14:	XP_020114769.1	evm.model.jcf7180002781679.159	0
153- 15:	XP_020107373.1	evm.model.jcf7180002781679.158	3e-128
153- 16:	XP_020083176.1	evm.model.jcf7180002781679.152	5e-33
153- 17:	XP_020109568.1	evm.model.jcf7180002781679.151	0
153- 18:	XP_020109596.1	evm.model.jcf7180002781679.147	9e-43
153- 19:	XP_020081256.1	evm.model.jcf7180002781679.136	1e-120
153- 20:	XP_020082926.1	evm.model.jcf7180002781679.123	4e-25
153- 21:	XP_020081497.1	evm.model.jcf7180002781679.120	0
153- 22:	XP_020083388.1	evm.model.jcf7180002781679.114	0
153- 23:	XP_020114449.1	evm.model.jcf7180002781679.109	2e-105
## Alignment 154: score=321.0 e_value=2.1e-10 N=7 NC_033622.1&jcf7180002781682 minus
154- 0:	XP_020113509.1	evm.model.jcf7180002781682.48	8e-46
154- 1:	XP_020113510.1	evm.model.jcf7180002781682.43	4e-136
154- 2:	XP_020083547.1	evm.model.jcf7180002781682.26	2e-19
154- 3:	XP_020110236.1	evm.model.jcf7180002781682.19	0
154- 4:	XP_020113522.1	evm.model.jcf7180002781682.13	1e-110
154- 5:	XP_020114318.1	evm.model.jcf7180002781682.7	3e-64
154- 6:	XP_020080760.1	evm.model.jcf7180002781682.4	8e-123
## Alignment 155: score=276.0 e_value=5.3e-08 N=6 NC_033622.1&jcf7180002781733 minus
155- 0:	XP_020083337.1	evm.model.jcf7180002781733.22	3e-52
155- 1:	XP_020110400.1	evm.model.jcf7180002781733.15	0
155- 2:	XP_020110406.1	evm.model.jcf7180002781733.13	0
155- 3:	XP_020081988.1	evm.model.jcf7180002781733.10	3e-38
155- 4:	XP_020082890.1	evm.model.jcf7180002781733.3	9e-64
155- 5:	XP_020114093.1	evm.model.jcf7180002781733.1	9e-37
## Alignment 156: score=379.0 e_value=7.8e-15 N=8 NC_033622.1&jcf7180002781959 plus
156- 0:	XP_020083419.1	evm.model.jcf7180002781959.33	2e-29
156- 1:	XP_020083039.1	evm.model.jcf7180002781959.45	1e-176
156- 2:	XP_020108977.1	evm.model.jcf7180002781959.46	4e-48
156- 3:	XP_020083191.1	evm.model.jcf7180002781959.59	3e-166
156- 4:	XP_020110849.1	evm.model.jcf7180002781959.75	1e-70
156- 5:	XP_020110146.1	evm.model.jcf7180002781959.77	7e-54
156- 6:	XP_020082888.1	evm.model.jcf7180002781959.85	1e-41
156- 7:	XP_020080421.1	evm.model.jcf7180002781959.89	1e-174
## Alignment 157: score=270.0 e_value=3.1e-09 N=6 NC_033623.1&jcf7180002734023 plus
157- 0:	XP_020084804.1	evm.model.jcf7180002734023.178	0
157- 1:	XP_020084803.1	evm.model.jcf7180002734023.181	0
157- 2:	XP_020084392.1	evm.model.jcf7180002734023.188	5e-143
157- 3:	XP_020084842.1	evm.model.jcf7180002734023.192	1e-65
157- 4:	XP_020083947.1	evm.model.jcf7180002734023.197	0
157- 5:	XP_020083610.1	evm.model.jcf7180002734023.213	6
## Alignment 158: score=265.0 e_value=6.6e-09 N=6 NC_033623.1&jcf7180002734023 plus
158- 0:	XP_020084303.1	evm.model.jcf7180002734023.12	0
158- 1:	XP_020083957.1	evm.model.jcf7180002734023.15	0
158- 2:	XP_020083954.1	evm.model.jcf7180002734023.17	0
158- 3:	XP_020083959.1	evm.model.jcf7180002734023.24	3e-143
158- 4:	XP_020084697.1	evm.model.jcf7180002734023.29	1e-59
158- 5:	XP_020084110.1	evm.model.jcf7180002734023.36	3e-157
## Alignment 159: score=1292.0 e_value=2.3e-86 N=28 NC_033623.1&jcf7180002757817 minus
159- 0:	XP_020084841.1	evm.model.jcf7180002757817.146	5e-133
159- 1:	XP_020084613.1	evm.model.jcf7180002757817.125	1e-47
159- 2:	XP_020083815.1	evm.model.jcf7180002757817.121	1e-57
159- 3:	XP_020085351.1	evm.model.jcf7180002757817.120	3e-131
159- 4:	XP_020084714.1	evm.model.jcf7180002757817.116	4e-45
159- 5:	XP_020085457.1	evm.model.jcf7180002757817.111	4e-23
159- 6:	XP_020084066.1	evm.model.jcf7180002757817.109	2e-44
159- 7:	XP_020085398.1	evm.model.jcf7180002757817.105	3e-55
159- 8:	XP_020084491.1	evm.model.jcf7180002757817.95	4e-103
159- 9:	XP_020085101.1	evm.model.jcf7180002757817.94	2e-166
159- 10:	XP_020084318.1	evm.model.jcf7180002757817.92	9e-29
159- 11:	XP_020084972.1	evm.model.jcf7180002757817.90	7e-51
159- 12:	XP_020083773.1	evm.model.jcf7180002757817.89	0
159- 13:	XP_020084470.1	evm.model.jcf7180002757817.85	3e-157
159- 14:	XP_020084973.1	evm.model.jcf7180002757817.84	1e-46
159- 15:	XP_020084469.1	evm.model.jcf7180002757817.81	0
159- 16:	XP_020085022.1	evm.model.jcf7180002757817.65	3e-130
159- 17:	XP_020083788.1	evm.model.jcf7180002757817.64	4e-51
159- 18:	XP_020085406.1	evm.model.jcf7180002757817.59	9e-127
159- 19:	XP_020084976.1	evm.model.jcf7180002757817.53	7e-59
159- 20:	XP_020083882.1	evm.model.jcf7180002757817.40	3e-153
159- 21:	XP_020084292.1	evm.model.jcf7180002757817.30	2e-124
159- 22:	XP_020084157.1	evm.model.jcf7180002757817.28	1e-55
159- 23:	XP_020085150.1	evm.model.jcf7180002757817.25	3e-31
159- 24:	XP_020084395.1	evm.model.jcf7180002757817.16	7e-107
159- 25:	XP_020084127.1	evm.model.jcf7180002757817.12	3e-74
159- 26:	XP_020085475.1	evm.model.jcf7180002757817.9	2e-110
159- 27:	XP_020085090.1	evm.model.jcf7180002757817.3	1e-95
## Alignment 160: score=376.0 e_value=5.5e-14 N=8 NC_033623.1&jcf7180002757817 minus
160- 0:	XP_020085137.1	evm.model.jcf7180002757817.180	2e-114
160- 1:	XP_020085499.1	evm.model.jcf7180002757817.176	4e-99
160- 2:	XP_020084455.1	evm.model.jcf7180002757817.170	3e-63
160- 3:	XP_020084805.1	evm.model.jcf7180002757817.169	2e-164
160- 4:	XP_020084808.1	evm.model.jcf7180002757817.166	2e-23
160- 5:	XP_020084792.1	evm.model.jcf7180002757817.165	1e-115
160- 6:	XP_020084947.1	evm.model.jcf7180002757817.159	4e-82
160- 7:	XP_020084392.1	evm.model.jcf7180002757817.156	6e-114
## Alignment 161: score=367.0 e_value=2.8e-14 N=8 NC_033623.1&jcf7180002757877 minus
161- 0:	XP_020084850.1	evm.model.jcf7180002757877.95	3e-21
161- 1:	XP_020085206.1	evm.model.jcf7180002757877.94	0
161- 2:	XP_020083608.1	evm.model.jcf7180002757877.54	0
161- 3:	XP_020085265.1	evm.model.jcf7180002757877.45	0
161- 4:	XP_020085268.1	evm.model.jcf7180002757877.43	0
161- 5:	XP_020084540.1	evm.model.jcf7180002757877.34	0
161- 6:	XP_020084081.1	evm.model.jcf7180002757877.18	0
161- 7:	XP_020084475.1	evm.model.jcf7180002757877.8	1e-41
## Alignment 162: score=425.0 e_value=1.8e-17 N=9 NC_033623.1&jcf7180002757888 plus
162- 0:	XP_020085197.1	evm.model.jcf7180002757888.15	8e-48
162- 1:	XP_020085198.1	evm.model.jcf7180002757888.16	1e-54
162- 2:	XP_020084062.1	evm.model.jcf7180002757888.18	0
162- 3:	XP_020085179.1	evm.model.jcf7180002757888.23	1e-165
162- 4:	XP_020084601.1	evm.model.jcf7180002757888.28	1e-12
162- 5:	XP_020085049.1	evm.model.jcf7180002757888.30	0
162- 6:	XP_020083780.1	evm.model.jcf7180002757888.32	9e-47
162- 7:	XP_020085167.1	evm.model.jcf7180002757888.35	0
162- 8:	XP_020085172.1	evm.model.jcf7180002757888.46	0.02
## Alignment 163: score=436.0 e_value=2e-20 N=9 NC_033623.1&jcf7180002757889 plus
163- 0:	XP_020083659.1	evm.model.jcf7180002757889.175	2e-14
163- 1:	XP_020083656.1	evm.model.jcf7180002757889.176	2e-104
163- 2:	XP_020085568.1	evm.model.jcf7180002757889.178	9e-136
163- 3:	XP_020084449.1	evm.model.jcf7180002757889.179	3e-135
163- 4:	XP_020084450.1	evm.model.jcf7180002757889.180	6e-67
163- 5:	XP_020084448.1	evm.model.jcf7180002757889.181	5e-171
163- 6:	XP_020085436.1	evm.model.jcf7180002757889.185	0
163- 7:	XP_020083734.1	evm.model.jcf7180002757889.197	0.009
163- 8:	XP_020084244.1	evm.model.jcf7180002757889.202	0
## Alignment 164: score=415.0 e_value=1.3e-17 N=9 NC_033623.1&jcf7180002757889 plus
164- 0:	XP_020085342.1	evm.model.jcf7180002757889.234	3e-86
164- 1:	XP_020084098.1	evm.model.jcf7180002757889.237	2e-45
164- 2:	XP_020084105.1	evm.model.jcf7180002757889.242	1e-88
164- 3:	XP_020085123.1	evm.model.jcf7180002757889.243	0
164- 4:	XP_020084499.1	evm.model.jcf7180002757889.250	0
164- 5:	XP_020083735.1	evm.model.jcf7180002757889.258	5e-35
164- 6:	XP_020085231.1	evm.model.jcf7180002757889.268	0
164- 7:	XP_020084949.1	evm.model.jcf7180002757889.294	2e-159
164- 8:	XP_020083654.1	evm.model.jcf7180002757889.311	2e-118
## Alignment 165: score=793.0 e_value=4.5e-48 N=18 NC_033623.1&jcf7180002766341 plus
165- 0:	XP_020084984.1	evm.model.jcf7180002766341.64	1e-44
165- 1:	XP_020085453.1	evm.model.jcf7180002766341.74	3e-70
165- 2:	XP_020084009.1	evm.model.jcf7180002766341.89	2e-104
165- 3:	XP_020084004.1	evm.model.jcf7180002766341.90	1e-153
165- 4:	XP_020083627.1	evm.model.jcf7180002766341.103	2e-51
165- 5:	XP_020084401.1	evm.model.jcf7180002766341.106	0
165- 6:	XP_020084410.1	evm.model.jcf7180002766341.108	7e-97
165- 7:	XP_020083714.1	evm.model.jcf7180002766341.119	8e-15
165- 8:	XP_020084373.1	evm.model.jcf7180002766341.120	7e-120
165- 9:	XP_020084238.1	evm.model.jcf7180002766341.126	4e-13
165- 10:	XP_020084783.1	evm.model.jcf7180002766341.142	1e-88
165- 11:	XP_020084002.1	evm.model.jcf7180002766341.173	6e-52
165- 12:	XP_020084539.1	evm.model.jcf7180002766341.177	1e-147
165- 13:	XP_020085547.1	evm.model.jcf7180002766341.185	4e-131
165- 14:	XP_020084753.1	evm.model.jcf7180002766341.186	8e-24
165- 15:	XP_020085133.1	evm.model.jcf7180002766341.190	1e-87
165- 16:	XP_020083883.1	evm.model.jcf7180002766341.196	7e-50
165- 17:	XP_020084452.1	evm.model.jcf7180002766341.200	0
## Alignment 166: score=345.0 e_value=2.4e-14 N=8 NC_033623.1&jcf7180002766363 minus
166- 0:	XP_020083864.1	evm.model.jcf7180002766363.133	7e-112
166- 1:	XP_020085356.1	evm.model.jcf7180002766363.121	1e-46
166- 2:	XP_020085054.1	evm.model.jcf7180002766363.116	0
166- 3:	XP_020084604.1	evm.model.jcf7180002766363.105	0
166- 4:	XP_020084256.1	evm.model.jcf7180002766363.102	2e-07
166- 5:	XP_020084257.1	evm.model.jcf7180002766363.99	2e-94
166- 6:	XP_020084266.1	evm.model.jcf7180002766363.84	1e-42
166- 7:	XP_020085396.1	evm.model.jcf7180002766363.83	2e-77
## Alignment 167: score=310.0 e_value=1.5e-12 N=7 NC_033623.1&jcf7180002766366 plus
167- 0:	XP_020085073.1	evm.model.jcf7180002766366.11	0
167- 1:	XP_020084867.1	evm.model.jcf7180002766366.24	2e-112
167- 2:	XP_020084519.1	evm.model.jcf7180002766366.32	0
167- 3:	XP_020085558.1	evm.model.jcf7180002766366.33	1e-17
167- 4:	XP_020083718.1	evm.model.jcf7180002766366.35	2e-29
167- 5:	XP_020084831.1	evm.model.jcf7180002766366.56	3e-71
167- 6:	XP_020084191.1	evm.model.jcf7180002766366.66	3e-83
## Alignment 168: score=299.0 e_value=6.4e-12 N=7 NC_033623.1&jcf7180002766393 plus
168- 0:	XP_020084250.1	evm.model.jcf7180002766393.75	0
168- 1:	XP_020083903.1	evm.model.jcf7180002766393.115	3e-101
168- 2:	XP_020083827.1	evm.model.jcf7180002766393.123	3e-111
168- 3:	XP_020084064.1	evm.model.jcf7180002766393.130	0
168- 4:	XP_020084554.1	evm.model.jcf7180002766393.131	0
168- 5:	XP_020084584.1	evm.model.jcf7180002766393.136	2e-142
168- 6:	XP_020084596.1	evm.model.jcf7180002766393.138	2e-130
## Alignment 169: score=499.0 e_value=5e-24 N=11 NC_033623.1&jcf7180002766393 minus
169- 0:	XP_020083656.1	evm.model.jcf7180002766393.110	2e-89
169- 1:	XP_020084551.1	evm.model.jcf7180002766393.109	3e-35
169- 2:	XP_020084244.1	evm.model.jcf7180002766393.102	0
169- 3:	XP_020084961.1	evm.model.jcf7180002766393.101	0
169- 4:	XP_020085002.1	evm.model.jcf7180002766393.96	5e-58
169- 5:	XP_020084289.1	evm.model.jcf7180002766393.94	4e-47
169- 6:	XP_020083957.1	evm.model.jcf7180002766393.92	0
169- 7:	XP_020083954.1	evm.model.jcf7180002766393.90	0
169- 8:	XP_020084696.1	evm.model.jcf7180002766393.80	4e-50
169- 9:	XP_020084697.1	evm.model.jcf7180002766393.79	1e-67
169- 10:	XP_020084250.1	evm.model.jcf7180002766393.75	0
## Alignment 170: score=500.0 e_value=7.3e-23 N=11 NC_033623.1&jcf7180002766563 minus
170- 0:	XP_020084591.1	evm.model.jcf7180002766563.305	6e-109
170- 1:	XP_020084597.1	evm.model.jcf7180002766563.302	4e-27
170- 2:	XP_020084416.1	evm.model.jcf7180002766563.281	7e-16
170- 3:	XP_020084417.1	evm.model.jcf7180002766563.269	5e-121
170- 4:	XP_020084414.1	evm.model.jcf7180002766563.264	6e-100
170- 5:	XP_020085131.1	evm.model.jcf7180002766563.257	7e-25
170- 6:	XP_020084024.1	evm.model.jcf7180002766563.252	5e-51
170- 7:	XP_020084728.1	evm.model.jcf7180002766563.250	6e-43
170- 8:	XP_020083603.1	evm.model.jcf7180002766563.243	0
170- 9:	XP_020084669.1	evm.model.jcf7180002766563.235	9e-95
170- 10:	XP_020084660.1	evm.model.jcf7180002766563.222	3e-127
## Alignment 171: score=308.0 e_value=2.7e-13 N=7 NC_033623.1&jcf7180002766696 minus
171- 0:	XP_020083765.1	evm.model.jcf7180002766696.102	0
171- 1:	XP_020085094.1	evm.model.jcf7180002766696.94	7e-102
171- 2:	XP_020085298.1	evm.model.jcf7180002766696.84	1e-63
171- 3:	XP_020085575.1	evm.model.jcf7180002766696.83	3e-78
171- 4:	XP_020083787.1	evm.model.jcf7180002766696.67	5e-52
171- 5:	XP_020083785.1	evm.model.jcf7180002766696.63	0
171- 6:	XP_020084220.1	evm.model.jcf7180002766696.10	2e-34
## Alignment 172: score=284.0 e_value=3.4e-10 N=6 NC_033623.1&jcf7180002766722 minus
172- 0:	XP_020085083.1	evm.model.jcf7180002766722.44	2e-53
172- 1:	XP_020085288.1	evm.model.jcf7180002766722.41	4e-160
172- 2:	XP_020085237.1	evm.model.jcf7180002766722.32	7e-105
172- 3:	XP_020084439.1	evm.model.jcf7180002766722.17	0
172- 4:	XP_020084824.1	evm.model.jcf7180002766722.16	3e-142
172- 5:	XP_020084917.1	evm.model.jcf7180002766722.15	4e-77
## Alignment 173: score=308.0 e_value=2e-11 N=7 NC_033623.1&jcf7180002766760 plus
173- 0:	XP_020083821.1	evm.model.jcf7180002766760.37	7e-43
173- 1:	XP_020085490.1	evm.model.jcf7180002766760.40	2e-68
173- 2:	XP_020083884.1	evm.model.jcf7180002766760.51	2e-21
173- 3:	XP_020084063.1	evm.model.jcf7180002766760.52	0
173- 4:	XP_020084599.1	evm.model.jcf7180002766760.62	2e-99
173- 5:	XP_020085106.1	evm.model.jcf7180002766760.64	6e-99
173- 6:	XP_020085130.1	evm.model.jcf7180002766760.67	1e-143
## Alignment 174: score=269.0 e_value=2.5e-08 N=6 NC_033623.1&jcf7180002766894 plus
174- 0:	XP_020083941.1	evm.model.jcf7180002766894.10	2e-148
174- 1:	XP_020083927.1	evm.model.jcf7180002766894.12	0
174- 2:	XP_020084351.1	evm.model.jcf7180002766894.21	2e-78
174- 3:	XP_020084345.1	evm.model.jcf7180002766894.24	1e-150
174- 4:	XP_020084348.1	evm.model.jcf7180002766894.28	5e-117
174- 5:	XP_020084365.1	evm.model.jcf7180002766894.29	5e-41
[truncated: 11,326 more rows]

## Sheet: Asparagus vs Trichopus
Table S9C. Collinear genes between A. officinalis and T. zeylanicus
############### Parameters ###############
# MATCH_SCORE: 50
# MATCH_SIZE: 5
# GAP_PENALTY: -1
# OVERLAP_WINDOW: 5
# E_VALUE: 1e-05
# MAX GAPS: 25
############### Statistics ###############
# Number of collinear genes: 13798, Percentage: 19.73
# Number of all genes: 69942
##########################################
## Alignment 0: score=1355.0 e_value=3.5e-98 N=30 NC_033794.1&jcf7180002734023 minus
0- 0:	XP_020241546.1	evm.model.jcf7180002734023.140	3e-139
0- 1:	XP_020241557.1	evm.model.jcf7180002734023.137	4e-16
0- 2:	XP_020241657.1	evm.model.jcf7180002734023.134	7e-160
0- 3:	XP_020241783.1	evm.model.jcf7180002734023.125	1e-133
0- 4:	XP_020254300.1	evm.model.jcf7180002734023.118	4e-77
0- 5:	XP_020241904.1	evm.model.jcf7180002734023.112	4e-51
0- 6:	XP_020241938.1	evm.model.jcf7180002734023.111	6e-168
0- 7:	XP_020241970.1	evm.model.jcf7180002734023.109	8e-19
0- 8:	XP_020241979.1	evm.model.jcf7180002734023.105	2e-40
0- 9:	XP_020242015.1	evm.model.jcf7180002734023.103	2
0- 10:	XP_020242238.1	evm.model.jcf7180002734023.90	0
0- 11:	XP_020242277.1	evm.model.jcf7180002734023.85	2e-103
0- 12:	XP_020242300.1	evm.model.jcf7180002734023.83	7e-115
0- 13:	XP_020242332.1	evm.model.jcf7180002734023.80	8e-117
0- 14:	XP_020242342.1	evm.model.jcf7180002734023.79	1e-169
0- 15:	XP_020242417.1	evm.model.jcf7180002734023.78	8e-57
0- 16:	XP_020254435.1	evm.model.jcf7180002734023.76	0
0- 17:	XP_020242457.1	evm.model.jcf7180002734023.70	1e-83
0- 18:	XP_020242468.1	evm.model.jcf7180002734023.69	6e-36
0- 19:	XP_020242481.1	evm.model.jcf7180002734023.67	4e-125
0- 20:	XP_020242493.1	evm.model.jcf7180002734023.66	3e-78
0- 21:	XP_020242504.1	evm.model.jcf7180002734023.58	5e-154
0- 22:	XP_020242520.1	evm.model.jcf7180002734023.56	2e-111
0- 23:	XP_020254524.1	evm.model.jcf7180002734023.44	1e-148
0- 24:	XP_020242539.1	evm.model.jcf7180002734023.33	0
0- 25:	XP_020242566.1	evm.model.jcf7180002734023.22	0
0- 26:	XP_020254557.1	evm.model.jcf7180002734023.18	4e-65
0- 27:	XP_020242628.1	evm.model.jcf7180002734023.12	0
0- 28:	XP_020242665.1	evm.model.jcf7180002734023.9	8e-19
0- 29:	XP_020242734.1	evm.model.jcf7180002734023.2	6e-35
## Alignment 1: score=273.0 e_value=3.3e-09 N=6 NC_033794.1&jcf7180002737628 minus
1- 0:	XP_020251269.1	evm.model.jcf7180002737628.84	2e-89
1- 1:	XP_020251274.1	evm.model.jcf7180002737628.78	6e-122
1- 2:	XP_020251275.1	evm.model.jcf7180002737628.72	4e-37
1- 3:	XP_020251276.1	evm.model.jcf7180002737628.70	9e-83
1- 4:	XP_020251288.1	evm.model.jcf7180002737628.67	0
1- 5:	XP_020251296.1	evm.model.jcf7180002737628.57	0
## Alignment 2: score=608.0 e_value=1.1e-38 N=15 NC_033794.1&jcf7180002757815 minus
2- 0:	XP_020249581.1	evm.model.jcf7180002757815.160	5e-100
2- 1:	XP_020260479.1	evm.model.jcf7180002757815.158	0
2- 2:	XP_020249769.1	evm.model.jcf7180002757815.148	0
2- 3:	XP_020249917.1	evm.model.jcf7180002757815.143	3e-104
2- 4:	XP_020250048.1	evm.model.jcf7180002757815.135	1e-127
2- 5:	XP_020250057.1	evm.model.jcf7180002757815.132	4e-17
2- 6:	XP_020250125.1	evm.model.jcf7180002757815.131	4e-43
2- 7:	XP_020250134.1	evm.model.jcf7180002757815.129	0
2- 8:	XP_020250222.1	evm.model.jcf7180002757815.111	6e-06
2- 9:	XP_020267694.1	evm.model.jcf7180002757815.105	3e-60
2- 10:	XP_020250277.1	evm.model.jcf7180002757815.104	0
2- 11:	XP_020250290.1	evm.model.jcf7180002757815.103	2e-69
2- 12:	XP_020250388.1	evm.model.jcf7180002757815.100	0
2- 13:	XP_020250522.1	evm.model.jcf7180002757815.98	2e-138
2- 14:	XP_020250566.1	evm.model.jcf7180002757815.94	9e-11
## Alignment 3: score=335.0 e_value=2.8e-14 N=8 NC_033794.1&jcf7180002757859 plus
3- 0:	XP_020242417.1	evm.model.jcf7180002757859.15	1e-52
3- 1:	XP_020242457.1	evm.model.jcf7180002757859.17	1e-89
3- 2:	XP_020242481.1	evm.model.jcf7180002757859.22	3e-137
3- 3:	XP_020254524.1	evm.model.jcf7180002757859.32	2e-26
3- 4:	XP_020242613.1	evm.model.jcf7180002757859.47	1e-53
3- 5:	XP_020242743.1	evm.model.jcf7180002757859.62	7e-81
3- 6:	XP_020242818.1	evm.model.jcf7180002757859.65	0
3- 7:	XP_020242838.1	evm.model.jcf7180002757859.68	3e-29
## Alignment 4: score=346.0 e_value=1.3e-10 N=7 NC_033794.1&jcf7180002757859 minus
4- 0:	XP_020254146.1	evm.model.jcf7180002757859.84	3e-37
4- 1:	XP_020241440.1	evm.model.jcf7180002757859.83	0
4- 2:	XP_020241452.1	evm.model.jcf7180002757859.82	1e-23
4- 3:	XP_020241463.1	evm.model.jcf7180002757859.79	3e-43
4- 4:	XP_020241493.1	evm.model.jcf7180002757859.78	2e-44
4- 5:	XP_020254168.1	evm.model.jcf7180002757859.76	0
4- 6:	XP_020254178.1	evm.model.jcf7180002757859.72	0
## Alignment 5: score=278.0 e_value=3e-09 N=6 NC_033794.1&jcf7180002757889 minus
5- 0:	XP_020244133.1	evm.model.jcf7180002757889.120	6e-14
5- 1:	XP_020244162.1	evm.model.jcf7180002757889.110	1e-101
5- 2:	XP_020244174.1	evm.model.jcf7180002757889.109	8e-76
5- 3:	XP_020244192.1	evm.model.jcf7180002757889.108	6e-56
5- 4:	XP_020244251.1	evm.model.jcf7180002757889.101	1e-108
5- 5:	XP_020244306.1	evm.model.jcf7180002757889.100	2e-99
## Alignment 6: score=510.0 e_value=8.4e-26 N=11 NC_033794.1&jcf7180002757890 plus
6- 0:	XP_020268713.1	evm.model.jcf7180002757890.23	2e-18
6- 1:	XP_020269717.1	evm.model.jcf7180002757890.27	0
6- 2:	XP_020271131.1	evm.model.jcf7180002757890.28	1e-162
6- 3:	XP_020271924.1	evm.model.jcf7180002757890.29	2e-69
6- 4:	XP_020265417.1	evm.model.jcf7180002757890.36	0
6- 5:	XP_020240670.1	evm.model.jcf7180002757890.42	2e-72
6- 6:	XP_020265426.1	evm.model.jcf7180002757890.44	0
6- 7:	XP_020268978.1	evm.model.jcf7180002757890.52	3e-51
6- 8:	XP_020251625.1	evm.model.jcf7180002757890.64	2e-09
6- 9:	XP_020265630.1	evm.model.jcf7180002757890.68	7e-139
6- 10:	XP_020252321.1	evm.model.jcf7180002757890.73	6e-139
## Alignment 7: score=264.0 e_value=2.4e-08 N=6 NC_033794.1&jcf7180002757899 minus
7- 0:	XP_020273313.1	evm.model.jcf7180002757899.91	8e-57
7- 1:	XP_020273373.1	evm.model.jcf7180002757899.87	0
7- 2:	XP_020273478.1	evm.model.jcf7180002757899.81	5e-52
7- 3:	XP_020273583.1	evm.model.jcf7180002757899.79	0
7- 4:	XP_020273648.1	evm.model.jcf7180002757899.67	0.003
7- 5:	XP_020273694.1	evm.model.jcf7180002757899.57	2e-64
## Alignment 8: score=319.0 e_value=6.5e-12 N=7 NC_033794.1&jcf7180002758040 minus
8- 0:	XP_020272890.1	evm.model.jcf7180002758040.32	0
8- 1:	XP_020272876.1	evm.model.jcf7180002758040.31	2e-52
8- 2:	XP_020272923.1	evm.model.jcf7180002758040.30	2e-171
8- 3:	XP_020272989.1	evm.model.jcf7180002758040.26	8e-12
8- 4:	XP_020252797.1	evm.model.jcf7180002758040.23	3e-50
8- 5:	XP_020252806.1	evm.model.jcf7180002758040.12	4e-113
8- 6:	XP_020255547.1	evm.model.jcf7180002758040.7	6e-123
## Alignment 9: score=399.0 e_value=5.8e-18 N=9 NC_033794.1&jcf7180002766357 plus
9- 0:	XP_020268242.1	evm.model.jcf7180002766357.81	7e-76
9- 1:	XP_020268339.1	evm.model.jcf7180002766357.91	5e-124
9- 2:	XP_020268435.1	evm.model.jcf7180002766357.92	8e-62
9- 3:	XP_020268689.1	evm.model.jcf7180002766357.99	0
9- 4:	XP_020269115.1	evm.model.jcf7180002766357.104	1e-70
9- 5:	XP_020269882.1	evm.model.jcf7180002766357.126	4e-163
9- 6:	XP_020270276.1	evm.model.jcf7180002766357.143	3e-121
9- 7:	XP_020270898.1	evm.model.jcf7180002766357.151	1e-124
9- 8:	XP_020266241.1	evm.model.jcf7180002766357.174	4e-81
## Alignment 10: score=272.0 e_value=1.6e-09 N=6 NC_033794.1&jcf7180002766357 plus
10- 0:	XP_020253456.1	evm.model.jcf7180002766357.242	8e-57
10- 1:	XP_020275253.1	evm.model.jcf7180002766357.257	0
10- 2:	XP_020275263.1	evm.model.jcf7180002766357.260	1e-121
10- 3:	XP_020275327.1	evm.model.jcf7180002766357.265	4e-52
10- 4:	XP_020275375.1	evm.model.jcf7180002766357.266	5e-15
10- 5:	XP_020275476.1	evm.model.jcf7180002766357.271	4e-114
## Alignment 11: score=405.0 e_value=8.9e-19 N=9 NC_033794.1&jcf7180002766357 minus
11- 0:	XP_020275375.1	evm.model.jcf7180002766357.266	5e-15
11- 1:	XP_020275514.1	evm.model.jcf7180002766357.250	2e-13
11- 2:	XP_020253485.1	evm.model.jcf7180002766357.247	4e-60
11- 3:	XP_020275537.1	evm.model.jcf7180002766357.241	6e-87
11- 4:	XP_020275549.1	evm.model.jcf7180002766357.237	4e-129
11- 5:	XP_020275634.1	evm.model.jcf7180002766357.235	5e-38
11- 6:	XP_020258413.1	evm.model.jcf7180002766357.233	2e-34
11- 7:	XP_020253512.1	evm.model.jcf7180002766357.232	1e-151
11- 8:	XP_020275676.1	evm.model.jcf7180002766357.205	1e-86
## Alignment 12: score=516.0 e_value=1.6e-23 N=11 NC_033794.1&jcf7180002766358 minus
12- 0:	XP_020251470.1	evm.model.jcf7180002766358.269	0
12- 1:	XP_020263081.1	evm.model.jcf7180002766358.268	1e-15
12- 2:	XP_020251477.1	evm.model.jcf7180002766358.265	2e-109
12- 3:	XP_020251481.1	evm.model.jcf7180002766358.260	4e-50
12- 4:	XP_020263089.1	evm.model.jcf7180002766358.249	0
12- 5:	XP_020251484.1	evm.model.jcf7180002766358.233	0
12- 6:	XP_020251489.1	evm.model.jcf7180002766358.229	2
12- 7:	XP_020268266.1	evm.model.jcf7180002766358.224	6e-42
12- 8:	XP_020251494.1	evm.model.jcf7180002766358.215	2e-96
12- 9:	XP_020251499.1	evm.model.jcf7180002766358.213	5e-165
12- 10:	XP_020251501.1	evm.model.jcf7180002766358.211	6e-90
## Alignment 13: score=326.0 e_value=1.1e-10 N=7 NC_033794.1&jcf7180002766358 minus
13- 0:	XP_020272475.1	evm.model.jcf7180002766358.270	0
13- 1:	XP_020272482.1	evm.model.jcf7180002766358.261	1e-136
13- 2:	XP_020252640.1	evm.model.jcf7180002766358.248	1e-127
13- 3:	XP_020272490.1	evm.model.jcf7180002766358.245	0
13- 4:	XP_020272526.1	evm.model.jcf7180002766358.221	0
13- 5:	XP_020272534.1	evm.model.jcf7180002766358.219	0
13- 6:	XP_020254503.1	evm.model.jcf7180002766358.212	2e-09
## Alignment 14: score=259.0 e_value=5.2e-09 N=6 NC_033794.1&jcf7180002766358 minus
14- 0:	XP_020243240.1	evm.model.jcf7180002766358.100	4e-36
14- 1:	XP_020243248.1	evm.model.jcf7180002766358.97	0
14- 2:	XP_020255198.1	evm.model.jcf7180002766358.80	0
14- 3:	XP_020243340.1	evm.model.jcf7180002766358.61	1e-44
14- 4:	XP_020243391.1	evm.model.jcf7180002766358.36	0
14- 5:	XP_020255264.1	evm.model.jcf7180002766358.33	6e-22
## Alignment 15: score=762.0 e_value=6.1e-44 N=17 NC_033794.1&jcf7180002766363 plus
15- 0:	XP_020275763.1	evm.model.jcf7180002766363.53	0
15- 1:	XP_020275774.1	evm.model.jcf7180002766363.54	6e-11
15- 2:	XP_020275785.1	evm.model.jcf7180002766363.60	1e-33
15- 3:	XP_020258730.1	evm.model.jcf7180002766363.83	4e-84
15- 4:	XP_020275965.1	evm.model.jcf7180002766363.100	0
15- 5:	XP_020258920.1	evm.model.jcf7180002766363.111	3e-61
15- 6:	XP_020276089.1	evm.model.jcf7180002766363.118	2e-08
15- 7:	XP_020253665.1	evm.model.jcf7180002766363.130	0
15- 8:	XP_020276222.1	evm.model.jcf7180002766363.134	1e-179
15- 9:	XP_020259097.1	evm.model.jcf7180002766363.140	0
15- 10:	XP_020276253.1	evm.model.jcf7180002766363.146	0
15- 11:	XP_020276307.1	evm.model.jcf7180002766363.151	0
15- 12:	XP_020253712.1	evm.model.jcf7180002766363.152	1e-54
15- 13:	XP_020259181.1	evm.model.jcf7180002766363.158	4e-63
15- 14:	XP_020259291.1	evm.model.jcf7180002766363.166	0
15- 15:	XP_020276389.1	evm.model.jcf7180002766363.167	1e-59
15- 16:	XP_020276467.1	evm.model.jcf7180002766363.174	3e-121
## Alignment 16: score=253.0 e_value=2.1e-09 N=6 NC_033794.1&jcf7180002766363 minus
16- 0:	XP_020277403.1	evm.model.jcf7180002766363.53	3e-53
16- 1:	XP_020240877.1	evm.model.jcf7180002766363.41	1e-14
16- 2:	XP_020240977.1	evm.model.jcf7180002766363.27	1e-88
16- 3:	XP_020240986.1	evm.model.jcf7180002766363.24	0
16- 4:	XP_020240997.1	evm.model.jcf7180002766363.22	4e-116
16- 5:	XP_020241022.1	evm.model.jcf7180002766363.16	4e-95
## Alignment 17: score=326.0 e_value=3.6e-15 N=8 NC_033794.1&jcf7180002766366 plus
17- 0:	XP_020276331.1	evm.model.jcf7180002766366.46	6e-23
17- 1:	XP_020253734.1	evm.model.jcf7180002766366.76	3e-117
17- 2:	XP_020259474.1	evm.model.jcf7180002766366.84	3e-56
17- 3:	XP_020276586.1	evm.model.jcf7180002766366.87	6e-33
17- 4:	XP_020276742.1	evm.model.jcf7180002766366.105	0
17- 5:	XP_020276753.1	evm.model.jcf7180002766366.107	5e-140
17- 6:	XP_020276780.1	evm.model.jcf7180002766366.109	1e-98
17- 7:	XP_020259927.1	evm.model.jcf7180002766366.128	3e-16
## Alignment 18: score=390.0 e_value=1.1e-17 N=9 NC_033794.1&jcf7180002766366 minus
18- 0:	XP_020277294.1	evm.model.jcf7180002766366.46	0
18- 1:	XP_020277305.1	evm.model.jcf7180002766366.43	7e-132
18- 2:	XP_020253980.1	evm.model.jcf7180002766366.35	3e-38
18- 3:	XP_020277414.1	evm.model.jcf7180002766366.33	0
18- 4:	XP_020240677.1	evm.model.jcf7180002766366.28	9e-52
18- 5:	XP_020253987.1	evm.model.jcf7180002766366.21	2e-26
18- 6:	XP_020240737.1	evm.model.jcf7180002766366.17	3e-122
18- 7:	XP_020240911.1	evm.model.jcf7180002766366.15	6e-72
18- 8:	XP_020241012.1	evm.model.jcf7180002766366.8	1e-72
## Alignment 19: score=288.0 e_value=8.7e-09 N=6 NC_033794.1&jcf7180002766366 minus
19- 0:	XP_020253899.1	evm.model.jcf7180002766366.66	1e-45
19- 1:	XP_020277006.1	evm.model.jcf7180002766366.61	7e-18
19- 2:	XP_020277024.1	evm.model.jcf7180002766366.60	0
19- 3:	XP_020277066.1	evm.model.jcf7180002766366.57	0
19- 4:	XP_020277079.1	evm.model.jcf7180002766366.56	6e-75
19- 5:	XP_020277093.1	evm.model.jcf7180002766366.53	2e-118
## Alignment 20: score=451.0 e_value=4.7e-22 N=10 NC_033794.1&jcf7180002766391 plus
20- 0:	XP_020252706.1	evm.model.jcf7180002766391.5	1e-90
20- 1:	XP_020252379.1	evm.model.jcf7180002766391.9	7e-20
20- 2:	XP_020271758.1	evm.model.jcf7180002766391.11	4e-119
20- 3:	XP_020271865.1	evm.model.jcf7180002766391.24	1e-63
20- 4:	XP_020271917.1	evm.model.jcf7180002766391.30	3e-167
20- 5:	XP_020271927.1	evm.model.jcf7180002766391.52	4e-114
20- 6:	XP_020271964.1	evm.model.jcf7180002766391.54	9e-131
20- 7:	XP_020271956.1	evm.model.jcf7180002766391.64	0.03
20- 8:	XP_020271984.1	evm.model.jcf7180002766391.69	1e-80
20- 9:	XP_020271997.1	evm.model.jcf7180002766391.70	7e-100
## Alignment 21: score=308.0 e_value=4.1e-14 N=8 NC_033794.1&jcf7180002766391 minus
21- 0:	XP_020249739.1	evm.model.jcf7180002766391.216	2e-96
21- 1:	XP_020260756.1	evm.model.jcf7180002766391.203	2e-116
21- 2:	XP_020249976.1	evm.model.jcf7180002766391.196	5e-16
21- 3:	XP_020250070.1	evm.model.jcf7180002766391.186	0
21- 4:	XP_020250157.1	evm.model.jcf7180002766391.169	0
21- 5:	XP_020267694.1	evm.model.jcf7180002766391.157	2e-76
21- 6:	XP_020267710.1	evm.model.jcf7180002766391.155	5e-89
21- 7:	XP_020267737.1	evm.model.jcf7180002766391.121	4e-67
## Alignment 22: score=1339.0 e_value=9.9e-95 N=29 NC_033794.1&jcf7180002766393 plus
22- 0:	XP_020242088.1	evm.model.jcf7180002766393.1	0
22- 1:	XP_020242133.1	evm.model.jcf7180002766393.11	4e-150
22- 2:	XP_020242277.1	evm.model.jcf7180002766393.20	6e-114
22- 3:	XP_020242300.1	evm.model.jcf7180002766393.22	0
22- 4:	XP_020242314.1	evm.model.jcf7180002766393.23	0
22- 5:	XP_020242332.1	evm.model.jcf7180002766393.24	1e-121
22- 6:	XP_020242342.1	evm.model.jcf7180002766393.26	6e-160
22- 7:	XP_020242417.1	evm.model.jcf7180002766393.27	2e-59
22- 8:	XP_020254435.1	evm.model.jcf7180002766393.31	0
22- 9:	XP_020242444.1	evm.model.jcf7180002766393.33	4e-09
22- 10:	XP_020254445.1	evm.model.jcf7180002766393.34	0
22- 11:	XP_020242457.1	evm.model.jcf7180002766393.45	2e-86
22- 12:	XP_020242468.1	evm.model.jcf7180002766393.46	3e-47
22- 13:	XP_020242504.1	evm.model.jcf7180002766393.53	0
22- 14:	XP_020242520.1	evm.model.jcf7180002766393.55	2e-111
22- 15:	XP_020254524.1	evm.model.jcf7180002766393.65	3e-148
22- 16:	XP_020242539.1	evm.model.jcf7180002766393.75	0
22- 17:	XP_020242604.1	evm.model.jcf7180002766393.91	5e-124
22- 18:	XP_020242613.1	evm.model.jcf7180002766393.94	3e-46
22- 19:	XP_020242665.1	evm.model.jcf7180002766393.100	7e-66
22- 20:	XP_020242658.1	evm.model.jcf7180002766393.101	0
22- 21:	XP_020242679.1	evm.model.jcf7180002766393.102	0
22- 22:	XP_020242734.1	evm.model.jcf7180002766393.107	5e-175
22- 23:	XP_020242790.1	evm.model.jcf7180002766393.120	3e-124
22- 24:	XP_020242826.1	evm.model.jcf7180002766393.132	3e-113
22- 25:	XP_020242868.1	evm.model.jcf7180002766393.138	7e-146
22- 26:	XP_020242856.1	evm.model.jcf7180002766393.139	1e-71
22- 27:	XP_020242877.1	evm.model.jcf7180002766393.141	2e-84
22- 28:	XP_020242887.1	evm.model.jcf7180002766393.143	0
## Alignment 23: score=404.0 e_value=3.4e-20 N=9 NC_033794.1&jcf7180002766393 minus
23- 0:	XP_020241236.1	evm.model.jcf7180002766393.186	6e-69
23- 1:	XP_020241248.1	evm.model.jcf7180002766393.183	0
23- 2:	XP_020241385.1	evm.model.jcf7180002766393.165	5e-50
23- 3:	XP_020262264.1	evm.model.jcf7180002766393.159	0
23- 4:	XP_020254146.1	evm.model.jcf7180002766393.156	3e-32
23- 5:	XP_020241440.1	evm.model.jcf7180002766393.155	0
23- 6:	XP_020241493.1	evm.model.jcf7180002766393.151	2e-51
23- 7:	XP_020254168.1	evm.model.jcf7180002766393.148	0
23- 8:	XP_020254202.1	evm.model.jcf7180002766393.142	0
## Alignment 24: score=295.0 e_value=1.4e-08 N=6 NC_033794.1&jcf7180002766393 minus
24- 0:	XP_020270747.1	evm.model.jcf7180002766393.209	2e-144
24- 1:	XP_020270758.1	evm.model.jcf7180002766393.207	4e-13
24- 2:	XP_020270765.1	evm.model.jcf7180002766393.200	0
24- 3:	XP_020270769.1	evm.model.jcf7180002766393.199	6e-148
24- 4:	XP_020270791.1	evm.model.jcf7180002766393.196	2e-24
24- 5:	XP_020270785.1	evm.model.jcf7180002766393.195	3e-110
## Alignment 25: score=595.0 e_value=3.1e-34 N=14 NC_033794.1&jcf7180002766406 plus
25- 0:	XP_020242015.1	evm.model.jcf7180002766406.70	2e-31
25- 1:	XP_020254332.1	evm.model.jcf7180002766406.74	3e-37
25- 2:	XP_020242225.1	evm.model.jcf7180002766406.83	1e-142
25- 3:	XP_020242238.1	evm.model.jcf7180002766406.84	2e-13
25- 4:	XP_020254406.1	evm.model.jcf7180002766406.90	9e-105
25- 5:	XP_020242417.1	evm.model.jcf7180002766406.95	6e-68
25- 6:	XP_020242457.1	evm.model.jcf7180002766406.98	2e-43
25- 7:	XP_020242493.1	evm.model.jcf7180002766406.99	0.002
25- 8:	XP_020254524.1	evm.model.jcf7180002766406.107	5e-17
25- 9:	XP_020242613.1	evm.model.jcf7180002766406.116	3e-32
25- 10:	XP_020242628.1	evm.model.jcf7180002766406.118	0
25- 11:	XP_020242686.1	evm.model.jcf7180002766406.121	7e-83
25- 12:	XP_020242818.1	evm.model.jcf7180002766406.131	0
25- 13:	XP_020242838.1	evm.model.jcf7180002766406.133	5e-27
## Alignment 26: score=355.0 e_value=1.1e-16 N=8 NC_033794.1&jcf7180002766439 plus
26- 0:	XP_020271377.1	evm.model.jcf7180002766439.11	1e-124
26- 1:	XP_020271393.1	evm.model.jcf7180002766439.22	4e-23
26- 2:	XP_020271415.1	evm.model.jcf7180002766439.26	4e-151
26- 3:	XP_020271466.1	evm.model.jcf7180002766439.31	8e-139
26- 4:	XP_020271484.1	evm.model.jcf7180002766439.40	6e-19
26- 5:	XP_020271583.1	evm.model.jcf7180002766439.53	8e-19
26- 6:	XP_020271602.1	evm.model.jcf7180002766439.62	0
26- 7:	XP_020271642.1	evm.model.jcf7180002766439.63	2e-134
## Alignment 27: score=1270.0 e_value=2.8e-94 N=28 NC_033794.1&jcf7180002766494 plus
27- 0:	XP_020251560.1	evm.model.jcf7180002766494.60	0
27- 1:	XP_020251566.1	evm.model.jcf7180002766494.77	2e-72
27- 2:	XP_020251568.1	evm.model.jcf7180002766494.80	0
27- 3:	XP_020268366.1	evm.model.jcf7180002766494.83	3e-32
27- 4:	XP_020263321.1	evm.model.jcf7180002766494.85	8e-28
27- 5:	XP_020263346.1	evm.model.jcf7180002766494.86	0
27- 6:	XP_020251584.1	evm.model.jcf7180002766494.96	4e-77
27- 7:	XP_020251587.1	evm.model.jcf7180002766494.97	1e-107
27- 8:	XP_020251590.1	evm.model.jcf7180002766494.100	0
27- 9:	XP_020251599.1	evm.model.jcf7180002766494.102	9e-34
27- 10:	XP_020251600.1	evm.model.jcf7180002766494.103	1e-135
27- 11:	XP_020251606.1	evm.model.jcf7180002766494.106	0
27- 12:	XP_020251610.1	evm.model.jcf7180002766494.108	0
27- 13:	XP_020251611.1	evm.model.jcf7180002766494.110	3e-31
27- 14:	XP_020268413.1	evm.model.jcf7180002766494.114	2e-112
27- 15:	XP_020251612.1	evm.model.jcf7180002766494.116	0
27- 16:	XP_020251615.1	evm.model.jcf7180002766494.117	1e-66
27- 17:	XP_020251622.1	evm.model.jcf7180002766494.119	0
27- 18:	XP_020251624.1	evm.model.jcf7180002766494.121	9e-43
27- 19:	XP_020251626.1	evm.model.jcf7180002766494.123	1e-146
27- 20:	XP_020263460.1	evm.model.jcf7180002766494.124	9e-131
27- 21:	XP_020251628.1	evm.model.jcf7180002766494.125	4e-17
27- 22:	XP_020251630.1	evm.model.jcf7180002766494.127	2e-15
27- 23:	XP_020251641.1	evm.model.jcf7180002766494.130	4e-135
27- 24:	XP_020251659.1	evm.model.jcf7180002766494.147	3e-17
27- 25:	XP_020251660.1	evm.model.jcf7180002766494.148	8e-171
27- 26:	XP_020251664.1	evm.model.jcf7180002766494.151	1e-54
27- 27:	XP_020251674.1	evm.model.jcf7180002766494.185	0
## Alignment 28: score=262.0 e_value=7.9e-10 N=6 NC_033794.1&jcf7180002766494 plus
28- 0:	XP_020251720.1	evm.model.jcf7180002766494.160	3e-22
28- 1:	XP_020251723.1	evm.model.jcf7180002766494.161	0
28- 2:	XP_020251731.1	evm.model.jcf7180002766494.172	1e-145
28- 3:	XP_020251735.1	evm.model.jcf7180002766494.179	3e-180
28- 4:	XP_020251750.1	evm.model.jcf7180002766494.194	3e-73
28- 5:	XP_020268535.1	evm.model.jcf7180002766494.196	2e-42
## Alignment 29: score=350.0 e_value=5.6e-15 N=8 NC_033794.1&jcf7180002766494 minus
29- 0:	XP_020251673.1	evm.model.jcf7180002766494.190	0
29- 1:	XP_020251694.1	evm.model.jcf7180002766494.181	1e-34
29- 2:	XP_020251702.1	evm.model.jcf7180002766494.179	4e-73
29- 3:	XP_020251706.1	evm.model.jcf7180002766494.178	4e-39
29- 4:	XP_020268484.1	evm.model.jcf7180002766494.177	8e-19
29- 5:	XP_020251716.1	evm.model.jcf7180002766494.169	2e-75
29- 6:	XP_020251717.1	evm.model.jcf7180002766494.168	1e-128
29- 7:	XP_020251720.1	evm.model.jcf7180002766494.160	3e-22
## Alignment 30: score=304.0 e_value=7.5e-12 N=7 NC_033794.1&jcf7180002766494 minus
30- 0:	XP_020263089.1	evm.model.jcf7180002766494.55	0
30- 1:	XP_020251483.1	evm.model.jcf7180002766494.49	0
30- 2:	XP_020263099.1	evm.model.jcf7180002766494.44	2e-36
30- 3:	XP_020251488.1	evm.model.jcf7180002766494.32	1e-48
30- 4:	XP_020268259.1	evm.model.jcf7180002766494.27	2e-62
30- 5:	XP_020251501.1	evm.model.jcf7180002766494.20	1e-112
30- 6:	XP_020263199.1	evm.model.jcf7180002766494.3	7e-09
## Alignment 31: score=286.0 e_value=1.4e-08 N=6 NC_033794.1&jcf7180002766498 plus
31- 0:	XP_020244114.1	evm.model.jcf7180002766498.62	0
31- 1:	XP_020244387.1	evm.model.jcf7180002766498.64	5e-96
31- 2:	XP_020244752.1	evm.model.jcf7180002766498.66	0
31- 3:	XP_020244854.1	evm.model.jcf7180002766498.71	3e-31
31- 4:	XP_020245317.1	evm.model.jcf7180002766498.73	6e-43
31- 5:	XP_020266442.1	evm.model.jcf7180002766498.74	2e-44
## Alignment 32: score=371.0 e_value=7.8e-15 N=8 NC_033794.1&jcf7180002766504 minus
32- 0:	XP_020243712.1	evm.model.jcf7180002766504.105	5e-14
32- 1:	XP_020255567.1	evm.model.jcf7180002766504.103	1e-24
32- 2:	XP_020255610.1	evm.model.jcf7180002766504.90	2e-152
32- 3:	XP_020243767.1	evm.model.jcf7180002766504.87	4e-92
32- 4:	XP_020243837.1	evm.model.jcf7180002766504.74	6e-28
32- 5:	XP_020255711.1	evm.model.jcf7180002766504.69	2e-55
32- 6:	XP_020243907.1	evm.model.jcf7180002766504.67	2e-151
32- 7:	XP_020255777.1	evm.model.jcf7180002766504.60	0
## Alignment 33: score=289.0 e_value=1.2e-08 N=6 NC_033794.1&jcf7180002766522 minus
33- 0:	XP_020246535.1	evm.model.jcf7180002766522.146	1e-30
33- 1:	XP_020246838.1	evm.model.jcf7180002766522.145	2e-85
33- 2:	XP_020247030.1	evm.model.jcf7180002766522.142	1e-109
33- 3:	XP_020247115.1	evm.model.jcf7180002766522.132	1e-116
33- 4:	XP_020247632.1	evm.model.jcf7180002766522.130	0
33- 5:	XP_020247739.1	evm.model.jcf7180002766522.129	2e-31
## Alignment 34: score=313.0 e_value=9.8e-14 N=7 NC_033794.1&jcf7180002766523 minus
34- 0:	XP_020274137.1	evm.model.jcf7180002766523.56	3e-64
34- 1:	XP_020274303.1	evm.model.jcf7180002766523.30	2e-138
34- 2:	XP_020274351.1	evm.model.jcf7180002766523.20	0
34- 3:	XP_020274382.1	evm.model.jcf7180002766523.18	0
34- 4:	XP_020274393.1	evm.model.jcf7180002766523.16	0.003
34- 5:	XP_020274462.1	evm.model.jcf7180002766523.9	2e-104
34- 6:	XP_020274471.1	evm.model.jcf7180002766523.8	3e-32
## Alignment 35: score=1152.0 e_value=3.2e-86 N=26 NC_033794.1&jcf7180002766573 minus
35- 0:	XP_020262421.1	evm.model.jcf7180002766573.186	4e-21
35- 1:	XP_020251350.1	evm.model.jcf7180002766573.185	5e-06
35- 2:	XP_020251369.1	evm.model.jcf7180002766573.171	4e-128
35- 3:	XP_020251370.1	evm.model.jcf7180002766573.166	6e-146
35- 4:	XP_020251374.1	evm.model.jcf7180002766573.164	2e-97
35- 5:	XP_020251377.1	evm.model.jcf7180002766573.163	2
35- 6:	XP_020251388.1	evm.model.jcf7180002766573.159	4e-11
35- 7:	XP_020251391.1	evm.model.jcf7180002766573.158	0
35- 8:	XP_020268124.1	evm.model.jcf7180002766573.157	5e-27
35- 9:	XP_020251403.1	evm.model.jcf7180002766573.152	0
35- 10:	XP_020251409.1	evm.model.jcf7180002766573.151	6e-97
35- 11:	XP_020262823.1	evm.model.jcf7180002766573.143	2e-96
35- 12:	XP_020251421.1	evm.model.jcf7180002766573.141	2e-68
35- 13:	XP_020262831.1	evm.model.jcf7180002766573.138	1e-37
35- 14:	XP_020262860.1	evm.model.jcf7180002766573.137	5e-13
35- 15:	XP_020251430.1	evm.model.jcf7180002766573.131	0
35- 16:	XP_020251431.1	evm.model.jcf7180002766573.120	0
35- 17:	XP_020251444.1	evm.model.jcf7180002766573.109	2e-33
35- 18:	XP_020251447.1	evm.model.jcf7180002766573.108	4e-45
35- 19:	XP_020251449.1	evm.model.jcf7180002766573.105	2e-128
35- 20:	XP_020268216.1	evm.model.jcf7180002766573.104	1e-110
35- 21:	XP_020262960.1	evm.model.jcf7180002766573.100	3e-113
35- 22:	XP_020251454.1	evm.model.jcf7180002766573.96	8e-92
35- 23:	XP_020251455.1	evm.model.jcf7180002766573.94	0
35- 24:	XP_020262992.1	evm.model.jcf7180002766573.92	0
35- 25:	XP_020251459.1	evm.model.jcf7180002766573.59	2e-24
## Alignment 36: score=379.0 e_value=1.5e-14 N=8 NC_033794.1&jcf7180002766685 plus
36- 0:	XP_020248717.1	evm.model.jcf7180002766685.186	0
36- 1:	XP_020249079.1	evm.model.jcf7180002766685.189	2e-166
36- 2:	XP_020249339.1	evm.model.jcf7180002766685.192	0
36- 3:	XP_020249411.1	evm.model.jcf7180002766685.193	0
36- 4:	XP_020249482.1	evm.model.jcf7180002766685.200	4e-13
36- 5:	XP_020249631.1	evm.model.jcf7180002766685.201	4e-100
36- 6:	XP_020249718.1	evm.model.jcf7180002766685.204	2e-43
36- 7:	XP_020266490.1	evm.model.jcf7180002766685.205	1e-54
## Alignment 37: score=276.0 e_value=0 N=6 NC_033794.1&jcf7180002766685 minus
37- 0:	XP_020273478.1	evm.model.jcf7180002766685.120	1e-71
37- 1:	XP_020273583.1	evm.model.jcf7180002766685.118	0
37- 2:	XP_020273589.1	evm.model.jcf7180002766685.116	7e-103
37- 3:	XP_020273660.1	evm.model.jcf7180002766685.104	3e-75
37- 4:	XP_020273669.1	evm.model.jcf7180002766685.103	0.003
37- 5:	XP_020273727.1	evm.model.jcf7180002766685.99	9e-119
## Alignment 38: score=286.0 e_value=2.1e-08 N=6 NC_033794.1&jcf7180002766686 plus
38- 0:	XP_020262419.1	evm.model.jcf7180002766686.5	6e-106
38- 1:	XP_020249960.1	evm.model.jcf7180002766686.6	2e-164
38- 2:	XP_020252129.1	evm.model.jcf7180002766686.14	0
38- 3:	XP_020254829.1	evm.model.jcf7180002766686.17	2e-102
38- 4:	XP_020256727.1	evm.model.jcf7180002766686.19	8e-163
38- 5:	XP_020257744.1	evm.model.jcf7180002766686.27	9e-19
## Alignment 39: score=264.0 e_value=9.5e-11 N=6 NC_033794.1&jcf7180002766686 minus
39- 0:	XP_020268560.1	evm.model.jcf7180002766686.95	2e-71
39- 1:	XP_020251809.1	evm.model.jcf7180002766686.91	4e-43
39- 2:	XP_020251812.1	evm.model.jcf7180002766686.89	5e-149
39- 3:	XP_020251819.1	evm.model.jcf7180002766686.86	5e-146
39- 4:	XP_020251823.1	evm.model.jcf7180002766686.84	1e-80
39- 5:	XP_020251829.1	evm.model.jcf7180002766686.45	5e-60
## Alignment 40: score=465.0 e_value=1e-22 N=10 NC_033794.1&jcf7180002766733 plus
40- 0:	XP_020267457.1	evm.model.jcf7180002766733.83	5e-07
40- 1:	XP_020249210.1	evm.model.jcf7180002766733.94	0
40- 2:	XP_020259971.1	evm.model.jcf7180002766733.101	1e-51
40- 3:	XP_020249219.1	evm.model.jcf7180002766733.103	9e-100
40- 4:	XP_020259992.1	evm.model.jcf7180002766733.105	0
40- 5:	XP_020249258.1	evm.model.jcf7180002766733.110	1e-154
40- 6:	XP_020249265.1	evm.model.jcf7180002766733.112	0
40- 7:	XP_020249273.1	evm.model.jcf7180002766733.116	4e-143
40- 8:	XP_020249300.1	evm.model.jcf7180002766733.118	2e-127
40- 9:	XP_020267500.1	evm.model.jcf7180002766733.119	1e-33
## Alignment 41: score=557.0 e_value=2.8e-28 N=12 NC_033794.1&jcf7180002766733 minus
41- 0:	XP_020248653.1	evm.model.jcf7180002766733.88	1e-64
41- 1:	XP_020259436.1	evm.model.jcf7180002766733.86	1e-99
41- 2:	XP_020259458.1	evm.model.jcf7180002766733.83	2e-49
41- 3:	XP_020248785.1	evm.model.jcf7180002766733.80	8e-137
41- 4:	XP_020248834.1	evm.model.jcf7180002766733.71	0
41- 5:	XP_020259534.1	evm.model.jcf7180002766733.60	2e-87
41- 6:	XP_020248934.1	evm.model.jcf7180002766733.35	4e-122
41- 7:	XP_020248958.1	evm.model.jcf7180002766733.31	9e-158
41- 8:	XP_020249002.1	evm.model.jcf7180002766733.27	0
41- 9:	XP_020248967.1	evm.model.jcf7180002766733.25	0
41- 10:	XP_020259586.1	evm.model.jcf7180002766733.24	2e-121
41- 11:	XP_020249010.1	evm.model.jcf7180002766733.23	1e-87
## Alignment 42: score=356.0 e_value=8.7e-15 N=8 NC_033794.1&jcf7180002766981 plus
42- 0:	XP_020270588.1	evm.model.jcf7180002766981.1	2e-161
42- 1:	XP_020270597.1	evm.model.jcf7180002766981.2	0
42- 2:	XP_020251767.1	evm.model.jcf7180002766981.4	2e-14
42- 3:	XP_020270646.1	evm.model.jcf7180002766981.11	0
42- 4:	XP_020270680.1	evm.model.jcf7180002766981.13	9e-44
42- 5:	XP_020270697.1	evm.model.jcf7180002766981.18	0
42- 6:	XP_020270727.1	evm.model.jcf7180002766981.37	4e-31
42- 7:	XP_020270823.1	evm.model.jcf7180002766981.57	0.1
## Alignment 43: score=293.0 e_value=8.4e-09 N=6 NC_033794.1&jcf7180002767016 plus
43- 0:	XP_020248934.1	evm.model.jcf7180002767016.3	2e-59
43- 1:	XP_020248958.1	evm.model.jcf7180002767016.8	0
43- 2:	XP_020249002.1	evm.model.jcf7180002767016.9	0
43- 3:	XP_020248967.1	evm.model.jcf7180002767016.10	5e-99
43- 4:	XP_020259586.1	evm.model.jcf7180002767016.12	4e-23
43- 5:	XP_020249010.1	evm.model.jcf7180002767016.14	4e-88
## Alignment 44: score=281.0 e_value=1.5e-09 N=6 NC_033794.1&jcf7180002767062 plus
44- 0:	XP_020273491.1	evm.model.jcf7180002767062.1	2e-151
44- 1:	XP_020273589.1	evm.model.jcf7180002767062.5	0
44- 2:	XP_020273607.1	evm.model.jcf7180002767062.8	1e-156
44- 3:	XP_020252902.1	evm.model.jcf7180002767062.9	9e-26
44- 4:	XP_020273636.1	evm.model.jcf7180002767062.16	1e-19
44- 5:	XP_020273684.1	evm.model.jcf7180002767062.26	2e-14
## Alignment 45: score=292.0 e_value=1.9e-08 N=6 NC_033794.1&jcf7180002767082 minus
45- 0:	XP_020274279.1	evm.model.jcf7180002767082.32	9e-132
45- 1:	XP_020274303.1	evm.model.jcf7180002767082.28	0
45- 2:	XP_020253146.1	evm.model.jcf7180002767082.26	0
45- 3:	XP_020274351.1	evm.model.jcf7180002767082.18	0
45- 4:	XP_020274382.1	evm.model.jcf7180002767082.16	0
45- 5:	XP_020274393.1	evm.model.jcf7180002767082.15	8e-171
## Alignment 46: score=554.0 e_value=3.2e-26 N=12 NC_033794.1&jcf7180002767129 minus
46- 0:	XP_020240977.1	evm.model.jcf7180002767129.94	2e-132
46- 1:	XP_020240986.1	evm.model.jcf7180002767129.91	0
46- 2:	XP_020240997.1	evm.model.jcf7180002767129.88	1e-24
46- 3:	XP_020241022.1	evm.model.jcf7180002767129.80	2e-37
46- 4:	XP_020241074.1	evm.model.jcf7180002767129.78	0
46- 5:	XP_020241160.1	evm.model.jcf7180002767129.72	0
46- 6:	XP_020241236.1	evm.model.jcf7180002767129.69	4e-15
46- 7:	XP_020241248.1	evm.model.jcf7180002767129.67	0
46- 8:	XP_020241374.1	evm.model.jcf7180002767129.54	4e-79
46- 9:	XP_020262264.1	evm.model.jcf7180002767129.43	3e-82
46- 10:	XP_020241440.1	evm.model.jcf7180002767129.40	0
46- 11:	XP_020241493.1	evm.model.jcf7180002767129.38	1e-52
## Alignment 47: score=471.0 e_value=8.7e-20 N=10 NC_033794.1&jcf7180002767137 minus
47- 0:	XP_020248717.1	evm.model.jcf7180002767137.62	0
47- 1:	XP_020248367.1	evm.model.jcf7180002767137.58	4e-49
47- 2:	XP_020249079.1	evm.model.jcf7180002767137.57	0
47- 3:	XP_020249224.1	evm.model.jcf7180002767137.50	0
47- 4:	XP_020266472.1	evm.model.jcf7180002767137.49	2e-08
47- 5:	XP_020249482.1	evm.model.jcf7180002767137.42	5e-16
47- 6:	XP_020249631.1	evm.model.jcf7180002767137.38	5e-97
47- 7:	XP_020266490.1	evm.model.jcf7180002767137.34	1e-51
47- 8:	XP_020269374.1	evm.model.jcf7180002767137.33	5e-92
47- 9:	XP_020269387.1	evm.model.jcf7180002767137.25	4e-32
## Alignment 48: score=381.0 e_value=3.8e-14 N=8 NC_033794.1&jcf7180002767137 minus
48- 0:	XP_020272130.1	evm.model.jcf7180002767137.123	0
48- 1:	XP_020272146.1	evm.model.jcf7180002767137.118	3e-133
48- 2:	XP_020253954.1	evm.model.jcf7180002767137.113	3e-127
48- 3:	XP_020272175.1	evm.model.jcf7180002767137.110	3e-48
48- 4:	XP_020272190.1	evm.model.jcf7180002767137.99	0.0002
48- 5:	XP_020272224.1	evm.model.jcf7180002767137.94	3e-47
48- 6:	XP_020252549.1	evm.model.jcf7180002767137.74	4e-177
48- 7:	XP_020272262.1	evm.model.jcf7180002767137.70	4e-81
## Alignment 49: score=272.0 e_value=4.8e-09 N=6 NC_033794.1&jcf7180002767137 minus
49- 0:	XP_020268366.1	evm.model.jcf7180002767137.31	2e-29
49- 1:	XP_020263321.1	evm.model.jcf7180002767137.30	3e-21
49- 2:	XP_020251571.1	evm.model.jcf7180002767137.28	3e-53
49- 3:	XP_020263346.1	evm.model.jcf7180002767137.20	7e-27
49- 4:	XP_020251586.1	evm.model.jcf7180002767137.10	9e-87
49- 5:	XP_020251590.1	evm.model.jcf7180002767137.7	6e-130
## Alignment 50: score=278.0 e_value=7.7e-09 N=6 NC_033794.1&jcf7180002767207 plus
50- 0:	XP_020250891.1	evm.model.jcf7180002767207.34	7e-101
50- 1:	XP_020250922.1	evm.model.jcf7180002767207.46	2e-165
50- 2:	XP_020250955.1	evm.model.jcf7180002767207.48	1e-122
50- 3:	XP_020261407.1	evm.model.jcf7180002767207.49	5e-21
50- 4:	XP_020261443.1	evm.model.jcf7180002767207.50	7e-18
50- 5:	XP_020267833.1	evm.model.jcf7180002767207.56	2e-32
## Alignment 51: score=274.0 e_value=4.7e-10 N=6 NC_033794.1&jcf7180002767207 plus
51- 0:	XP_020251192.1	evm.model.jcf7180002767207.16	0
51- 1:	XP_020251202.1	evm.model.jcf7180002767207.17	0
51- 2:	XP_020251217.1	evm.model.jcf7180002767207.20	6e-80
51- 3:	XP_020251236.1	evm.model.jcf7180002767207.22	0
51- 4:	XP_020251258.1	evm.model.jcf7180002767207.23	6e-140
51- 5:	XP_020251267.1	evm.model.jcf7180002767207.54	2e-41
## Alignment 52: score=483.0 e_value=3.5e-28 N=11 NC_033794.1&jcf7180002767208 plus
52- 0:	XP_020271212.1	evm.model.jcf7180002767208.1	2e-36
52- 1:	XP_020271377.1	evm.model.jcf7180002767208.18	0
52- 2:	XP_020271393.1	evm.model.jcf7180002767208.27	8e-47
52- 3:	XP_020271415.1	evm.model.jcf7180002767208.31	1e-179
52- 4:	XP_020271404.1	evm.model.jcf7180002767208.33	4e-69
52- 5:	XP_020271484.1	evm.model.jcf7180002767208.50	3e-22
52- 6:	XP_020271567.1	evm.model.jcf7180002767208.61	1e-30
52- 7:	XP_020271577.1	evm.model.jcf7180002767208.63	0
52- 8:	XP_020271583.1	evm.model.jcf7180002767208.67	1e-173
52- 9:	XP_020271602.1	evm.model.jcf7180002767208.82	0
52- 10:	XP_020271642.1	evm.model.jcf7180002767208.84	5e-09
## Alignment 53: score=277.0 e_value=1.6e-09 N=6 NC_033794.1&jcf7180002767210 plus
53- 0:	XP_020255349.1	evm.model.jcf7180002767210.66	0
53- 1:	XP_020243568.1	evm.model.jcf7180002767210.80	1e-100
53- 2:	XP_020243584.1	evm.model.jcf7180002767210.102	1e-144
53- 3:	XP_020243589.1	evm.model.jcf7180002767210.104	2e-67
53- 4:	XP_020243603.1	evm.model.jcf7180002767210.112	0
53- 5:	XP_020243614.1	evm.model.jcf7180002767210.114	9e-38
## Alignment 54: score=425.0 e_value=8.3e-17 N=9 NC_033794.1&jcf7180002767226 plus
54- 0:	XP_020274558.1	evm.model.jcf7180002767226.10	3e-121
54- 1:	XP_020274590.1	evm.model.jcf7180002767226.14	4e-32
54- 2:	XP_020274631.1	evm.model.jcf7180002767226.19	2e-127
54- 3:	XP_020274622.1	evm.model.jcf7180002767226.20	5e-20
54- 4:	XP_020274638.1	evm.model.jcf7180002767226.23	0
54- 5:	XP_020274646.1	evm.model.jcf7180002767226.26	6e-86
54- 6:	XP_020274663.1	evm.model.jcf7180002767226.30	0
54- 7:	XP_020274695.1	evm.model.jcf7180002767226.45	5e-134
54- 8:	XP_020274752.1	evm.model.jcf7180002767226.67	0
## Alignment 55: score=255.0 e_value=5.7e-10 N=6 NC_033794.1&jcf7180002767273 plus
55- 0:	XP_020251192.1	evm.model.jcf7180002767273.80	5e-149
55- 1:	XP_020251202.1	evm.model.jcf7180002767273.81	7e-147
55- 2:	XP_020251217.1	evm.model.jcf7180002767273.83	4e-102
55- 3:	XP_020251258.1	evm.model.jcf7180002767273.84	6e-63
55- 4:	XP_020261789.1	evm.model.jcf7180002767273.128	3e-37
55- 5:	XP_020267958.1	evm.model.jcf7180002767273.154	7e-13
## Alignment 56: score=593.0 e_value=5e-37 N=13 NC_033794.1&jcf7180002767273 minus
56- 0:	XP_020267694.1	evm.model.jcf7180002767273.177	4e-106
56- 1:	XP_020267710.1	evm.model.jcf7180002767273.175	1e-111
56- 2:	XP_020250269.1	evm.model.jcf7180002767273.173	0
56- 3:	XP_020250277.1	evm.model.jcf7180002767273.171	0
56- 4:	XP_020250287.1	evm.model.jcf7180002767273.170	2e-172
56- 5:	XP_020250290.1	evm.model.jcf7180002767273.169	1e-68
56- 6:	XP_020250303.1	evm.model.jcf7180002767273.168	1e-93
56- 7:	XP_020260979.1	evm.model.jcf7180002767273.165	2e-43
56- 8:	XP_020250335.1	evm.model.jcf7180002767273.163	2e-69
56- 9:	XP_020250498.1	evm.model.jcf7180002767273.155	0
56- 10:	XP_020250530.1	evm.model.jcf7180002767273.154	5e-86
56- 11:	XP_020250522.1	evm.model.jcf7180002767273.153	8e-162
56- 12:	XP_020250693.1	evm.model.jcf7180002767273.121	6e-150
## Alignment 57: score=348.0 e_value=5.2e-15 N=8 NC_033794.1&jcf7180002767350 minus
57- 0:	XP_020272121.1	evm.model.jcf7180002767350.73	0
57- 1:	XP_020272130.1	evm.model.jcf7180002767350.62	0
57- 2:	XP_020272146.1	evm.model.jcf7180002767350.61	4e-28
57- 3:	XP_020272175.1	evm.model.jcf7180002767350.57	3e-109
57- 4:	XP_020252525.1	evm.model.jcf7180002767350.55	0
57- 5:	XP_020272210.1	evm.model.jcf7180002767350.51	1e-15
57- 6:	XP_020272310.1	evm.model.jcf7180002767350.42	0
57- 7:	XP_020252620.1	evm.model.jcf7180002767350.30	3e-165
## Alignment 58: score=405.0 e_value=1.2e-19 N=9 NC_033794.1&jcf7180002767435 minus
58- 0:	XP_020248717.1	evm.model.jcf7180002767435.158	0
58- 1:	XP_020249079.1	evm.model.jcf7180002767435.155	2e-124
58- 2:	XP_020249224.1	evm.model.jcf7180002767435.152	0
58- 3:	XP_020249339.1	evm.model.jcf7180002767435.149	0
58- 4:	XP_020249411.1	evm.model.jcf7180002767435.148	0
58- 5:	XP_020249482.1	evm.model.jcf7180002767435.141	1e-93
58- 6:	XP_020249631.1	evm.model.jcf7180002767435.137	6e-78
58- 7:	XP_020266490.1	evm.model.jcf7180002767435.135	0
58- 8:	XP_020251309.1	evm.model.jcf7180002767435.115	4e-09
## Alignment 59: score=274.0 e_value=8.2e-12 N=7 NC_033794.1&jcf7180002767435 minus
59- 0:	XP_020251610.1	evm.model.jcf7180002767435.122	0
59- 1:	XP_020251627.1	evm.model.jcf7180002767435.118	1e-120
59- 2:	XP_020251628.1	evm.model.jcf7180002767435.117	3e-60
59- 3:	XP_020251645.1	evm.model.jcf7180002767435.116	0
59- 4:	XP_020251647.1	evm.model.jcf7180002767435.106	6e-40
59- 5:	XP_020251665.1	evm.model.jcf7180002767435.101	9e-176
59- 6:	XP_020263685.1	evm.model.jcf7180002767435.87	1e-51
## Alignment 60: score=324.0 e_value=4e-14 N=8 NC_033794.1&jcf7180002767467 plus
60- 0:	XP_020251720.1	evm.model.jcf7180002767467.20	1e-30
60- 1:	XP_020251723.1	evm.model.jcf7180002767467.21	2e-38
60- 2:	XP_020251735.1	evm.model.jcf7180002767467.32	3e-155
60- 3:	XP_020251742.1	evm.model.jcf7180002767467.45	0
60- 4:	XP_020251750.1	evm.model.jcf7180002767467.49	0
60- 5:	XP_020251758.1	evm.model.jcf7180002767467.50	2e-32
60- 6:	XP_020251783.1	evm.model.jcf7180002767467.54	5e-75
60- 7:	XP_020251800.1	evm.model.jcf7180002767467.65	0
## Alignment 61: score=300.0 e_value=4.9e-11 N=7 NC_033794.1&jcf7180002767467 minus
61- 0:	XP_020251673.1	evm.model.jcf7180002767467.43	2e-166
61- 1:	XP_020251674.1	evm.model.jcf7180002767467.37	0
61- 2:	XP_020251698.1	evm.model.jcf7180002767467.32	0
61- 3:	XP_020251706.1	evm.model.jcf7180002767467.30	2e-37
61- 4:	XP_020268484.1	evm.model.jcf7180002767467.29	9e-19
61- 5:	XP_020251716.1	evm.model.jcf7180002767467.27	2e-76
61- 6:	XP_020251720.1	evm.model.jcf7180002767467.20	1e-30
## Alignment 62: score=452.0 e_value=1.1e-23 N=10 NC_033794.1&jcf7180002767519 plus
62- 0:	XP_020253734.1	evm.model.jcf7180002767519.59	2e-93
62- 1:	XP_020259474.1	evm.model.jcf7180002767519.63	3e-56
62- 2:	XP_020276586.1	evm.model.jcf7180002767519.65	2e-09
62- 3:	XP_020253763.1	evm.model.jcf7180002767519.66	9e-30
62- 4:	XP_020276742.1	evm.model.jcf7180002767519.78	6e-129
62- 5:	XP_020276753.1	evm.model.jcf7180002767519.79	9e-159
62- 6:	XP_020276762.1	evm.model.jcf7180002767519.80	4e-65
62- 7:	XP_020276780.1	evm.model.jcf7180002767519.81	1e-98
62- 8:	XP_020253872.1	evm.model.jcf7180002767519.88	6e-130
62- 9:	XP_020259927.1	evm.model.jcf7180002767519.105	4e-14
## Alignment 63: score=453.0 e_value=4.8e-26 N=11 NC_033794.1&jcf7180002767519 minus
63- 0:	XP_020276808.1	evm.model.jcf7180002767519.112	0
63- 1:	XP_020276939.1	evm.model.jcf7180002767519.72	2e-133
63- 2:	XP_020253899.1	evm.model.jcf7180002767519.51	1e-44
63- 3:	XP_020253905.1	evm.model.jcf7180002767519.48	1e-13
63- 4:	XP_020253911.1	evm.model.jcf7180002767519.47	1e-172
63- 5:	XP_020277054.1	evm.model.jcf7180002767519.45	1e-40
63- 6:	XP_020277093.1	evm.model.jcf7180002767519.41	2e-120
63- 7:	XP_020277146.1	evm.model.jcf7180002767519.35	1e-106
63- 8:	XP_020277294.1	evm.model.jcf7180002767519.34	6e-11
63- 9:	XP_020253980.1	evm.model.jcf7180002767519.25	1e-45
63- 10:	XP_020253987.1	evm.model.jcf7180002767519.7	6e-30
## Alignment 64: score=365.0 e_value=5.5e-14 N=8 NC_033794.1&jcf7180002767665 plus
64- 0:	XP_020250034.1	evm.model.jcf7180002767665.4	3e-163
64- 1:	XP_020250077.1	evm.model.jcf7180002767665.10	1e-49
64- 2:	XP_020260843.1	evm.model.jcf7180002767665.12	0
64- 3:	XP_020250149.1	evm.model.jcf7180002767665.21	3e-105
64- 4:	XP_020250157.1	evm.model.jcf7180002767665.23	0
64- 5:	XP_020250187.1	evm.model.jcf7180002767665.26	4e-18
64- 6:	XP_020250222.1	evm.model.jcf7180002767665.27	2e-158
64- 7:	XP_020250277.1	evm.model.jcf7180002767665.32	0
## Alignment 65: score=283.0 e_value=5.7e-13 N=6 NC_033794.1&jcf7180002767708 minus
65- 0:	XP_020243712.1	evm.model.jcf7180002767708.37	3e-30
65- 1:	XP_020255567.1	evm.model.jcf7180002767708.36	0
65- 2:	XP_020255610.1	evm.model.jcf7180002767708.24	8e-162
65- 3:	XP_020243767.1	evm.model.jcf7180002767708.22	0
65- 4:	XP_020243875.1	evm.model.jcf7180002767708.3	5e-11
65- 5:	XP_020243849.1	evm.model.jcf7180002767708.2	8e-130
## Alignment 66: score=383.0 e_value=1.9e-13 N=8 NC_033794.1&jcf7180002767772 plus
66- 0:	XP_020255547.1	evm.model.jcf7180002767772.8	1e-99
66- 1:	XP_020273233.1	evm.model.jcf7180002767772.10	9e-12
66- 2:	XP_020273255.1	evm.model.jcf7180002767772.13	3e-20
66- 3:	XP_020252827.1	evm.model.jcf7180002767772.16	1e-38
66- 4:	XP_020252838.1	evm.model.jcf7180002767772.18	4e-11
66- 5:	XP_020273282.1	evm.model.jcf7180002767772.22	0
66- 6:	XP_020252860.1	evm.model.jcf7180002767772.31	3e-65
66- 7:	XP_020273313.1	evm.model.jcf7180002767772.39	6e-14
## Alignment 67: score=256.0 e_value=6.9e-10 N=6 NC_033794.1&jcf7180002767884 minus
67- 0:	XP_020276518.1	evm.model.jcf7180002767884.41	0
67- 1:	XP_020276531.1	evm.model.jcf7180002767884.38	0
67- 2:	XP_020276586.1	evm.model.jcf7180002767884.31	2e-32
67- 3:	XP_020276633.1	evm.model.jcf7180002767884.30	9e-64
67- 4:	XP_020276780.1	evm.model.jcf7180002767884.19	1e-98
67- 5:	XP_020276802.1	evm.model.jcf7180002767884.8	1e-180
## Alignment 68: score=268.0 e_value=2.8e-09 N=6 NC_033794.1&jcf7180002768005 plus
68- 0:	XP_020274502.1	evm.model.jcf7180002768005.3	0
68- 1:	XP_020274558.1	evm.model.jcf7180002768005.4	3e-46
68- 2:	XP_020274646.1	evm.model.jcf7180002768005.20	2e-42
68- 3:	XP_020274761.1	evm.model.jcf7180002768005.36	8e-43
68- 4:	XP_020274787.1	evm.model.jcf7180002768005.40	6e-26
68- 5:	XP_020274856.1	evm.model.jcf7180002768005.53	0
## Alignment 69: score=427.0 e_value=0 N=9 NC_033794.1&jcf7180002768150 minus
69- 0:	XP_020249985.1	evm.model.jcf7180002768150.30	7e-18
69- 1:	XP_020249976.1	evm.model.jcf7180002768150.29	7e-43
69- 2:	XP_020250005.1	evm.model.jcf7180002768150.28	0
69- 3:	XP_020250016.1	evm.model.jcf7180002768150.26	2e-65
69- 4:	XP_020250034.1	evm.model.jcf7180002768150.23	3e-07
69- 5:	XP_020250070.1	evm.model.jcf7180002768150.16	3e-101
69- 6:	XP_020250077.1	evm.model.jcf7180002768150.15	9e-11
69- 7:	XP_020260843.1	evm.model.jcf7180002768150.14	0
69- 8:	XP_020250140.1	evm.model.jcf7180002768150.9	1e-104
## Alignment 70: score=271.0 e_value=1.8e-08 N=6 NC_033794.1&jcf7180002768258 plus
70- 0:	XP_020251335.1	evm.model.jcf7180002768258.7	0
70- 1:	XP_020251339.1	evm.model.jcf7180002768258.8	6e-09
70- 2:	XP_020251342.1	evm.model.jcf7180002768258.11	0
70- 3:	XP_020251350.1	evm.model.jcf7180002768258.14	1e-53
70- 4:	XP_020268086.1	evm.model.jcf7180002768258.20	5e-20
70- 5:	XP_020251354.1	evm.model.jcf7180002768258.24	5e-107
## Alignment 71: score=297.0 e_value=5.2e-12 N=7 NC_033794.1&jcf7180002768508 plus
71- 0:	XP_020265966.1	evm.model.jcf7180002768508.124	2e-74
71- 1:	XP_020261456.1	evm.model.jcf7180002768508.135	4e-139
71- 2:	XP_020261834.1	evm.model.jcf7180002768508.139	0
71- 3:	XP_020261926.1	evm.model.jcf7180002768508.141	4e-94
71- 4:	XP_020262372.1	evm.model.jcf7180002768508.158	2e-112
71- 5:	XP_020263146.1	evm.model.jcf7180002768508.180	7e-57
71- 6:	XP_020263876.1	evm.model.jcf7180002768508.203	3e-159
## Alignment 72: score=305.0 e_value=3.5e-13 N=7 NC_033794.1&jcf7180002768508 minus
72- 0:	XP_020262894.1	evm.model.jcf7180002768508.202	6e-36
72- 1:	XP_020266050.1	evm.model.jcf7180002768508.196	5e-34
72- 2:	XP_020263078.1	evm.model.jcf7180002768508.187	0
72- 3:	XP_020266059.1	evm.model.jcf7180002768508.174	7e-13
72- 4:	XP_020269123.1	evm.model.jcf7180002768508.171	7e-28
72- 5:	XP_020266067.1	evm.model.jcf7180002768508.168	0
72- 6:	XP_020265564.1	evm.model.jcf7180002768508.131	3e-21
## Alignment 73: score=262.0 e_value=3.2e-12 N=6 NC_033794.1&jcf7180002768508 minus
73- 0:	XP_020271393.1	evm.model.jcf7180002768508.139	0
73- 1:	XP_020271466.1	evm.model.jcf7180002768508.128	1e-134
73- 2:	XP_020271476.1	evm.model.jcf7180002768508.114	4e-66
73- 3:	XP_020271484.1	evm.model.jcf7180002768508.108	5e-96
73- 4:	XP_020271577.1	evm.model.jcf7180002768508.102	0
73- 5:	XP_020271583.1	evm.model.jcf7180002768508.91	2e-148
## Alignment 74: score=337.0 e_value=3.5e-12 N=7 NC_033794.1&jcf7180002768563 plus
74- 0:	XP_020249210.1	evm.model.jcf7180002768563.41	0
74- 1:	XP_020259971.1	evm.model.jcf7180002768563.52	6e-21
74- 2:	XP_020249219.1	evm.model.jcf7180002768563.55	4e-78
74- 3:	XP_020259992.1	evm.model.jcf7180002768563.61	0
74- 4:	XP_020249235.1	evm.model.jcf7180002768563.65	0
74- 5:	XP_020249250.1	evm.model.jcf7180002768563.74	4e-13
74- 6:	XP_020249265.1	evm.model.jcf7180002768563.75	1e-161
## Alignment 75: score=425.0 e_value=3.1e-17 N=9 NC_033794.1&jcf7180002768579 minus
75- 0:	XP_020273255.1	evm.model.jcf7180002768579.53	1e-111
75- 1:	XP_020252827.1	evm.model.jcf7180002768579.52	2e-77
75- 2:	XP_020252838.1	evm.model.jcf7180002768579.51	3e-123
75- 3:	XP_020273282.1	evm.model.jcf7180002768579.48	0
75- 4:	XP_020252860.1	evm.model.jcf7180002768579.36	1e-67
75- 5:	XP_020273362.1	evm.model.jcf7180002768579.21	2e-68
75- 6:	XP_020273373.1	evm.model.jcf7180002768579.20	4e-18
75- 7:	XP_020273395.1	evm.model.jcf7180002768579.10	9e-38
75- 8:	XP_020273445.1	evm.model.jcf7180002768579.2	0
## Alignment 76: score=282.0 e_value=5.8e-10 N=6 NC_033794.1&jcf7180002771593 minus
76- 0:	XP_020266683.1	evm.model.jcf7180002771593.29	8e-124
76- 1:	XP_020244736.1	evm.model.jcf7180002771593.18	5e-117
76- 2:	XP_020244806.1	evm.model.jcf7180002771593.13	4e-153
76- 3:	XP_020256517.1	evm.model.jcf7180002771593.12	6e-55
76- 4:	XP_020266699.1	evm.model.jcf7180002771593.11	1e-31
76- 5:	XP_020256551.1	evm.model.jcf7180002771593.3	6e-104
## Alignment 77: score=415.0 e_value=8.1e-18 N=9 NC_033794.1&jcf7180002779176 minus
77- 0:	XP_020268182.1	evm.model.jcf7180002779176.63	5e-39
77- 1:	XP_020251430.1	evm.model.jcf7180002779176.62	0
77- 2:	XP_020251431.1	evm.model.jcf7180002779176.54	0
77- 3:	XP_020268216.1	evm.model.jcf7180002779176.41	2e-117
77- 4:	XP_020262960.1	evm.model.jcf7180002779176.34	6e-173
77- 5:	XP_020251455.1	evm.model.jcf7180002779176.29	6e-71
77- 6:	XP_020251456.1	evm.model.jcf7180002779176.28	3e-132
77- 7:	XP_020262992.1	evm.model.jcf7180002779176.24	2e-81
77- 8:	XP_020251458.1	evm.model.jcf7180002779176.23	3e-27
## Alignment 78: score=500.0 e_value=3.2e-26 N=11 NC_033794.1&jcf7180002779460 minus
78- 0:	XP_020247986.1	evm.model.jcf7180002779460.42	7e-54
78- 1:	XP_020248717.1	evm.model.jcf7180002779460.40	0
78- 2:	XP_020248825.1	evm.model.jcf7180002779460.39	2e-48
78- 3:	XP_020248367.1	evm.model.jcf7180002779460.34	0
78- 4:	XP_020249079.1	evm.model.jcf7180002779460.32	8e-65
78- 5:	XP_020249155.1	evm.model.jcf7180002779460.30	4e-64
78- 6:	XP_020266480.1	evm.model.jcf7180002779460.25	9e-132
78- 7:	XP_020249411.1	evm.model.jcf7180002779460.24	0.6
78- 8:	XP_020249874.1	evm.model.jcf7180002779460.17	1e-21
78- 9:	XP_020266490.1	evm.model.jcf7180002779460.13	2e-108
78- 10:	XP_020251309.1	evm.model.jcf7180002779460.6	4e-29
## Alignment 79: score=875.0 e_value=1.7e-53 N=19 NC_033794.1&jcf7180002779465 plus
79- 0:	XP_020251567.1	evm.model.jcf7180002779465.22	3e-92
79- 1:	XP_020251566.1	evm.model.jcf7180002779465.24	1e-66
79- 2:	XP_020268366.1	evm.model.jcf7180002779465.27	4e-28
79- 3:	XP_020263321.1	evm.model.jcf7180002779465.29	4e-30
79- 4:	XP_020263346.1	evm.model.jcf7180002779465.30	8e-100
79- 5:	XP_020251590.1	evm.model.jcf7180002779465.41	0
79- 6:	XP_020251598.1	evm.model.jcf7180002779465.43	7e-25
79- 7:	XP_020251606.1	evm.model.jcf7180002779465.48	0
79- 8:	XP_020251610.1	evm.model.jcf7180002779465.49	0
79- 9:	XP_020251611.1	evm.model.jcf7180002779465.50	0
79- 10:	XP_020268413.1	evm.model.jcf7180002779465.52	6e-19
79- 11:	XP_020251612.1	evm.model.jcf7180002779465.55	0
79- 12:	XP_020251622.1	evm.model.jcf7180002779465.58	0
79- 13:	XP_020251624.1	evm.model.jcf7180002779465.59	8e-72
79- 14:	XP_020251626.1	evm.model.jcf7180002779465.61	7e-160
79- 15:	XP_020263460.1	evm.model.jcf7180002779465.62	1e-06
79- 16:	XP_020251628.1	evm.model.jcf7180002779465.63	1e-16
79- 17:	XP_020251631.1	evm.model.jcf7180002779465.73	1e-80
79- 18:	XP_020251636.1	evm.model.jcf7180002779465.79	2e-80
## Alignment 80: score=338.0 e_value=1.1e-10 N=7 NC_033794.1&jcf7180002779465 minus
80- 0:	XP_020251517.1	evm.model.jcf7180002779465.20	1e-40
80- 1:	XP_020251518.1	evm.model.jcf7180002779465.18	0
80- 2:	XP_020268283.1	evm.model.jcf7180002779465.16	3e-147
80- 3:	XP_020263199.1	evm.model.jcf7180002779465.14	4e-61
80- 4:	XP_020251521.1	evm.model.jcf7180002779465.13	0
80- 5:	XP_020251522.1	evm.model.jcf7180002779465.11	4e-176
80- 6:	XP_020268316.1	evm.model.jcf7180002779465.10	3e-39
## Alignment 81: score=298.0 e_value=2.7e-15 N=7 NC_033794.1&jcf7180002780617 plus
81- 0:	XP_020266169.1	evm.model.jcf7180002780617.51	2e-10
81- 1:	XP_020268339.1	evm.model.jcf7180002780617.54	4e-73
81- 2:	XP_020268435.1	evm.model.jcf7180002780617.55	3e-46
81- 3:	XP_020268689.1	evm.model.jcf7180002780617.59	6e-15
81- 4:	XP_020269115.1	evm.model.jcf7180002780617.63	3e-71
81- 5:	XP_020270976.1	evm.model.jcf7180002780617.68	0.5
81- 6:	XP_020271875.1	evm.model.jcf7180002780617.124	0
## Alignment 82: score=747.0 e_value=1.7e-42 N=16 NC_033794.1&jcf7180002780685 plus
82- 0:	XP_020253456.1	evm.model.jcf7180002780685.130	5e-44
82- 1:	XP_020275190.1	evm.model.jcf7180002780685.131	0
82- 2:	XP_020275202.1	evm.model.jcf7180002780685.134	7e-175
82- 3:	XP_020275213.1	evm.model.jcf7180002780685.137	0
82- 4:	XP_020275230.1	evm.model.jcf7180002780685.138	8e-124
82- 5:	XP_020275253.1	evm.model.jcf7180002780685.152	8e-102
82- 6:	XP_020275297.1	evm.model.jcf7180002780685.161	4e-23
82- 7:	XP_020275358.1	evm.model.jcf7180002780685.167	0
82- 8:	XP_020275476.1	evm.model.jcf7180002780685.175	9e-118
82- 9:	XP_020275485.1	evm.model.jcf7180002780685.177	4e-12
82- 10:	XP_020275494.1	evm.model.jcf7180002780685.178	0
82- 11:	XP_020275537.1	evm.model.jcf7180002780685.190	4e-89
82- 12:	XP_020253503.1	evm.model.jcf7180002780685.196	6e-05
82- 13:	XP_020275652.1	evm.model.jcf7180002780685.197	0
82- 14:	XP_020258413.1	evm.model.jcf7180002780685.199	2e-48
82- 15:	XP_020253512.1	evm.model.jcf7180002780685.200	1e-166
## Alignment 83: score=310.0 e_value=2.8e-11 N=7 NC_033794.1&jcf7180002780685 minus
83- 0:	XP_020242953.1	evm.model.jcf7180002780685.122	0
83- 1:	XP_020243247.1	evm.model.jcf7180002780685.116	6e-84
83- 2:	XP_020243386.1	evm.model.jcf7180002780685.109	2e-129
83- 3:	XP_020244114.1	evm.model.jcf7180002780685.91	5e-56
83- 4:	XP_020244854.1	evm.model.jcf7180002780685.87	0
83- 5:	XP_020245317.1	evm.model.jcf7180002780685.84	4e-19
83- 6:	XP_020245886.1	evm.model.jcf7180002780685.82	9e-117
## Alignment 84: score=276.0 e_value=5.5e-09 N=6 NC_033794.1&jcf7180002780685 minus
84- 0:	XP_020266050.1	evm.model.jcf7180002780685.64	1e-33
84- 1:	XP_020263146.1	evm.model.jcf7180002780685.50	0
84- 2:	XP_020266059.1	evm.model.jcf7180002780685.42	2e-44
84- 3:	XP_020269123.1	evm.model.jcf7180002780685.39	3e-106
84- 4:	XP_020266067.1	evm.model.jcf7180002780685.36	0
84- 5:	XP_020264359.1	evm.model.jcf7180002780685.34	6e-18
## Alignment 85: score=364.0 e_value=4.1e-15 N=8 NC_033794.1&jcf7180002780879 plus
85- 0:	XP_020251974.1	evm.model.jcf7180002780879.319	2e-129
85- 1:	XP_020270992.1	evm.model.jcf7180002780879.335	1e-82
85- 2:	XP_020271032.1	evm.model.jcf7180002780879.339	1e-139
85- 3:	XP_020271040.1	evm.model.jcf7180002780879.342	4e-18
85- 4:	XP_020252012.1	evm.model.jcf7180002780879.343	0
85- 5:	XP_020271089.1	evm.model.jcf7180002780879.346	0
85- 6:	XP_020252033.1	evm.model.jcf7180002780879.351	1e-161
85- 7:	XP_020252281.1	evm.model.jcf7180002780879.361	4e-110
## Alignment 86: score=537.0 e_value=1.4e-26 N=12 NC_033794.1&jcf7180002780889 minus
86- 0:	XP_020251269.1	evm.model.jcf7180002780889.110	0
86- 1:	XP_020251274.1	evm.model.jcf7180002780889.102	0
86- 2:	XP_020261878.1	evm.model.jcf7180002780889.90	1e-58
86- 3:	XP_020251288.1	evm.model.jcf7180002780889.84	6e-75
86- 4:	XP_020251291.1	evm.model.jcf7180002780889.79	2e-46
86- 5:	XP_020251296.1	evm.model.jcf7180002780889.69	0
86- 6:	XP_020268006.1	evm.model.jcf7180002780889.68	2e-78
86- 7:	XP_020262099.1	evm.model.jcf7180002780889.66	4e-62
86- 8:	XP_020251319.1	evm.model.jcf7180002780889.63	0
86- 9:	XP_020262170.1	evm.model.jcf7180002780889.61	0
86- 10:	XP_020251321.1	evm.model.jcf7180002780889.60	5e-97
86- 11:	XP_020251325.1	evm.model.jcf7180002780889.54	0
## Alignment 87: score=254.0 e_value=3.4e-08 N=6 NC_033794.1&jcf7180002780893 plus
87- 0:	XP_020244494.1	evm.model.jcf7180002780893.43	5e-98
87- 1:	XP_020244579.1	evm.model.jcf7180002780893.55	0.0008
87- 2:	XP_020244597.1	evm.model.jcf7180002780893.61	2e-61
87- 3:	XP_020244657.1	evm.model.jcf7180002780893.65	0
87- 4:	XP_020256410.1	evm.model.jcf7180002780893.86	5e-31
87- 5:	XP_020244855.1	evm.model.jcf7180002780893.115	2e-35
## Alignment 88: score=262.0 e_value=5.8e-09 N=6 NC_033794.1&jcf7180002780897 minus
88- 0:	XP_020265635.1	evm.model.jcf7180002780897.64	9e-46
88- 1:	XP_020265417.1	evm.model.jcf7180002780897.36	0
88- 2:	XP_020240670.1	evm.model.jcf7180002780897.30	9e-86
88- 3:	XP_020242751.1	evm.model.jcf7180002780897.25	2e-110
88- 4:	XP_020268978.1	evm.model.jcf7180002780897.16	2e-46
88- 5:	XP_020251625.1	evm.model.jcf7180002780897.3	2e-71
## Alignment 89: score=495.0 e_value=8.9e-26 N=11 NC_033794.1&jcf7180002781131 plus
89- 0:	XP_020265187.1	evm.model.jcf7180002781131.43	4e-128
89- 1:	XP_020252046.1	evm.model.jcf7180002781131.83	3e-79
89- 2:	XP_020252057.1	evm.model.jcf7180002781131.88	9e-60
89- 3:	XP_020253424.1	evm.model.jcf7180002781131.91	0
89- 4:	XP_020268913.1	evm.model.jcf7180002781131.100	3e-154
89- 5:	XP_020262419.1	evm.model.jcf7180002781131.101	6e-126
89- 6:	XP_020249960.1	evm.model.jcf7180002781131.102	3e-68
89- 7:	XP_020265349.1	evm.model.jcf7180002781131.103	1e-11
89- 8:	XP_020254829.1	evm.model.jcf7180002781131.108	3e-87
89- 9:	XP_020256727.1	evm.model.jcf7180002781131.109	6e-162
89- 10:	XP_020257744.1	evm.model.jcf7180002781131.114	8e-20
## Alignment 90: score=561.0 e_value=1.1e-31 N=13 NC_033794.1&jcf7180002781131 minus
90- 0:	XP_020251750.1	evm.model.jcf7180002781131.222	2e-136
90- 1:	XP_020251758.1	evm.model.jcf7180002781131.221	0
90- 2:	XP_020251781.1	evm.model.jcf7180002781131.220	0
90- 3:	XP_020251782.1	evm.model.jcf7180002781131.218	2e-82
90- 4:	XP_020251799.1	evm.model.jcf7180002781131.210	6e-116
90- 5:	XP_020268560.1	evm.model.jcf7180002781131.197	9e-73
90- 6:	XP_020263940.1	evm.model.jcf7180002781131.195	1e-11
90- 7:	XP_020251809.1	evm.model.jcf7180002781131.193	3e-128
90- 8:	XP_020251816.1	evm.model.jcf7180002781131.190	0
90- 9:	XP_020251818.1	evm.model.jcf7180002781131.189	3e-154
90- 10:	XP_020268572.1	evm.model.jcf7180002781131.185	5e-46
90- 11:	XP_020251823.1	evm.model.jcf7180002781131.182	0.001
90- 12:	XP_020264055.1	evm.model.jcf7180002781131.146	0.3
## Alignment 91: score=336.0 e_value=1.6e-13 N=8 NC_033794.1&jcf7180002781131 minus
91- 0:	XP_020240670.1	evm.model.jcf7180002781131.205	8e-80
91- 1:	XP_020268966.1	evm.model.jcf7180002781131.165	0.5
91- 2:	XP_020268978.1	evm.model.jcf7180002781131.155	4e-62
91- 3:	XP_020265506.1	evm.model.jcf7180002781131.126	2e-21
91- 4:	XP_020251270.1	evm.model.jcf7180002781131.119	8e-38
91- 5:	XP_020265621.1	evm.model.jcf7180002781131.102	3e-65
91- 6:	XP_020252130.1	evm.model.jcf7180002781131.94	0
91- 7:	XP_020252389.1	evm.model.jcf7180002781131.87	4e-124
## Alignment 92: score=341.0 e_value=3.5e-17 N=8 NC_033794.1&jcf7180002781542 plus
92- 0:	XP_020269682.1	evm.model.jcf7180002781542.162	4e-52
92- 1:	XP_020269711.1	evm.model.jcf7180002781542.165	1e-12
92- 2:	XP_020269732.1	evm.model.jcf7180002781542.170	3e-138
92- 3:	XP_020269766.1	evm.model.jcf7180002781542.172	0
92- 4:	XP_020251395.1	evm.model.jcf7180002781542.176	3e-59
92- 5:	XP_020269772.1	evm.model.jcf7180002781542.178	3e-53
92- 6:	XP_020251415.1	evm.model.jcf7180002781542.228	0
92- 7:	XP_020269970.1	evm.model.jcf7180002781542.263	9e-66
## Alignment 93: score=1072.0 e_value=1.5e-70 N=23 NC_033794.1&jcf7180002781542 minus
93- 0:	XP_020252240.1	evm.model.jcf7180002781542.133	6e-33
93- 1:	XP_020270230.1	evm.model.jcf7180002781542.126	4e-96
93- 2:	XP_020270283.1	evm.model.jcf7180002781542.119	1e-29
93- 3:	XP_020270314.1	evm.model.jcf7180002781542.118	9e-72
93- 4:	XP_020251708.1	evm.model.jcf7180002781542.112	5e-47
93- 5:	XP_020252250.1	evm.model.jcf7180002781542.88	1e-126
93- 6:	XP_020270451.1	evm.model.jcf7180002781542.83	0
93- 7:	XP_020270460.1	evm.model.jcf7180002781542.82	0
93- 8:	XP_020270470.1	evm.model.jcf7180002781542.78	0
93- 9:	XP_020270529.1	evm.model.jcf7180002781542.75	3e-100
93- 10:	XP_020270539.1	evm.model.jcf7180002781542.74	0
93- 11:	XP_020270555.1	evm.model.jcf7180002781542.70	2e-13
93- 12:	XP_020270577.1	evm.model.jcf7180002781542.69	0
93- 13:	XP_020251743.1	evm.model.jcf7180002781542.67	0
93- 14:	XP_020270588.1	evm.model.jcf7180002781542.66	0
93- 15:	XP_020270597.1	evm.model.jcf7180002781542.65	0
93- 16:	XP_020270641.1	evm.model.jcf7180002781542.62	7e-52
93- 17:	XP_020270646.1	evm.model.jcf7180002781542.61	1e-44
93- 18:	XP_020270680.1	evm.model.jcf7180002781542.57	1e-31
93- 19:	XP_020270719.1	evm.model.jcf7180002781542.42	2e-95
93- 20:	XP_020270727.1	evm.model.jcf7180002781542.34	2e-19
93- 21:	XP_020270744.1	evm.model.jcf7180002781542.28	4e-76
93- 22:	XP_020270785.1	evm.model.jcf7180002781542.1	2e-105
## Alignment 94: score=421.0 e_value=4e-19 N=9 NC_033794.1&jcf7180002781544 minus
94- 0:	XP_020275190.1	evm.model.jcf7180002781544.52	0
94- 1:	XP_020275202.1	evm.model.jcf7180002781544.51	0
94- 2:	XP_020275213.1	evm.model.jcf7180002781544.49	2e-13
94- 3:	XP_020275230.1	evm.model.jcf7180002781544.46	3e-32
94- 4:	XP_020275241.1	evm.model.jcf7180002781544.43	0
94- 5:	XP_020275253.1	evm.model.jcf7180002781544.36	0
94- 6:	XP_020275297.1	evm.model.jcf7180002781544.33	4e-67
94- 7:	XP_020275485.1	evm.model.jcf7180002781544.15	3e-142
94- 8:	XP_020275494.1	evm.model.jcf7180002781544.13	0
## Alignment 95: score=517.0 e_value=2.2e-23 N=11 NC_033794.1&jcf7180002781633 minus
95- 0:	XP_020276089.1	evm.model.jcf7180002781633.71	7e-61
95- 1:	XP_020276109.1	evm.model.jcf7180002781633.70	9e-53
95- 2:	XP_020253665.1	evm.model.jcf7180002781633.62	0
95- 3:	XP_020276222.1	evm.model.jcf7180002781633.57	0
95- 4:	XP_020259097.1	evm.model.jcf7180002781633.50	0
95- 5:	XP_020276253.1	evm.model.jcf7180002781633.42	0
95- 6:	XP_020276307.1	evm.model.jcf7180002781633.38	0
95- 7:	XP_020253712.1	evm.model.jcf7180002781633.37	6e-57
95- 8:	XP_020276323.1	evm.model.jcf7180002781633.35	5e-75
95- 9:	XP_020276340.1	evm.model.jcf7180002781633.25	0
95- 10:	XP_020259291.1	evm.model.jcf7180002781633.20	0
## Alignment 96: score=287.0 e_value=1e-09 N=6 NC_033794.1&jcf7180002781633 minus
96- 0:	XP_020275751.1	evm.model.jcf7180002781633.128	5e-114
96- 1:	XP_020275763.1	evm.model.jcf7180002781633.127	2e-39
96- 2:	XP_020275774.1	evm.model.jcf7180002781633.126	5e-96
96- 3:	XP_020275785.1	evm.model.jcf7180002781633.121	2e-57
96- 4:	XP_020275883.1	evm.model.jcf7180002781633.102	6e-31
96- 5:	XP_020258730.1	evm.model.jcf7180002781633.99	2e-83
## Alignment 97: score=282.0 e_value=5.3e-09 N=6 NC_033794.1&jcf7180002781639 minus
97- 0:	XP_020271964.1	evm.model.jcf7180002781639.172	1e-118
97- 1:	XP_020253535.1	evm.model.jcf7180002781639.165	8e-39
97- 2:	XP_020272024.1	evm.model.jcf7180002781639.161	0
97- 3:	XP_020272062.1	evm.model.jcf7180002781639.160	2e-76
97- 4:	XP_020252466.1	evm.model.jcf7180002781639.159	0
97- 5:	XP_020272079.1	evm.model.jcf7180002781639.156	5e-65
## Alignment 98: score=887.0 e_value=1.1e-57 N=20 NC_033794.1&jcf7180002781679 plus
98- 0:	XP_020274137.1	evm.model.jcf7180002781679.68	3e-65
98- 1:	XP_020274269.1	evm.model.jcf7180002781679.98	1e-46
98- 2:	XP_020274351.1	evm.model.jcf7180002781679.110	1e-51
98- 3:	XP_020274382.1	evm.model.jcf7180002781679.114	0
98- 4:	XP_020274462.1	evm.model.jcf7180002781679.122	3e-107
98- 5:	XP_020274471.1	evm.model.jcf7180002781679.123	7e-35
98- 6:	XP_020274548.1	evm.model.jcf7180002781679.129	1e-28
98- 7:	XP_020274502.1	evm.model.jcf7180002781679.135	3e-123
98- 8:	XP_020274558.1	evm.model.jcf7180002781679.136	9e-112
98- 9:	XP_020274638.1	evm.model.jcf7180002781679.151	0
98- 10:	XP_020274646.1	evm.model.jcf7180002781679.152	5e-43
98- 11:	XP_020257268.1	evm.model.jcf7180002781679.155	0.005
98- 12:	XP_020253239.1	evm.model.jcf7180002781679.167	0
98- 13:	XP_020274787.1	evm.model.jcf7180002781679.170	6e-12
98- 14:	XP_020274832.1	evm.model.jcf7180002781679.181	2e-133
98- 15:	XP_020274856.1	evm.model.jcf7180002781679.183	0
98- 16:	XP_020274993.1	evm.model.jcf7180002781679.207	1e-55
98- 17:	XP_020257459.1	evm.model.jcf7180002781679.212	2e-34
98- 18:	XP_020275107.1	evm.model.jcf7180002781679.228	3e-50
98- 19:	XP_020275137.1	evm.model.jcf7180002781679.240	0
## Alignment 99: score=354.0 e_value=3e-20 N=9 NC_033794.1&jcf7180002781679 plus
99- 0:	XP_020271257.1	evm.model.jcf7180002781679.3	3e-37
99- 1:	XP_020271351.1	evm.model.jcf7180002781679.16	1e-67
99- 2:	XP_020271372.1	evm.model.jcf7180002781679.19	0
99- 3:	XP_020271430.1	evm.model.jcf7180002781679.21	0
99- 4:	XP_020271476.1	evm.model.jcf7180002781679.29	2e-65
99- 5:	XP_020271583.1	evm.model.jcf7180002781679.42	2e-95
99- 6:	XP_020271634.1	evm.model.jcf7180002781679.82	0
99- 7:	XP_020252164.1	evm.model.jcf7180002781679.110	7e-55
99- 8:	XP_020252174.1	evm.model.jcf7180002781679.129	5e-20
## Alignment 100: score=387.0 e_value=5.1e-13 N=8 NC_033794.1&jcf7180002781679 minus
100- 0:	XP_020246082.1	evm.model.jcf7180002781679.133	2e-40
100- 1:	XP_020246191.1	evm.model.jcf7180002781679.130	8e-92
100- 2:	XP_020246295.1	evm.model.jcf7180002781679.127	3e-135
100- 3:	XP_020246838.1	evm.model.jcf7180002781679.122	1e-132
100- 4:	XP_020246931.1	evm.model.jcf7180002781679.120	0
100- 5:	XP_020247115.1	evm.model.jcf7180002781679.118	3e-108
100- 6:	XP_020247522.1	evm.model.jcf7180002781679.116	0
100- 7:	XP_020247632.1	evm.model.jcf7180002781679.114	0
## Alignment 101: score=278.0 e_value=2.5e-11 N=6 NC_033794.1&jcf7180002781679 minus
101- 0:	XP_020244115.1	evm.model.jcf7180002781679.399	6e-171
101- 1:	XP_020244162.1	evm.model.jcf7180002781679.389	0
101- 2:	XP_020244174.1	evm.model.jcf7180002781679.388	2e-76
101- 3:	XP_020244192.1	evm.model.jcf7180002781679.387	6e-132
101- 4:	XP_020244199.1	evm.model.jcf7180002781679.386	1e-81
101- 5:	XP_020256074.1	evm.model.jcf7180002781679.364	5
## Alignment 102: score=413.0 e_value=2.5e-18 N=9 NC_033794.1&jcf7180002781697 plus
102- 0:	XP_020272121.1	evm.model.jcf7180002781697.136	0
102- 1:	XP_020253954.1	evm.model.jcf7180002781697.154	6e-129
102- 2:	XP_020272175.1	evm.model.jcf7180002781697.157	9e-28
102- 3:	XP_020252503.1	evm.model.jcf7180002781697.158	0
102- 4:	XP_020272190.1	evm.model.jcf7180002781697.164	7e-57
102- 5:	XP_020272224.1	evm.model.jcf7180002781697.168	2e-47
102- 6:	XP_020252549.1	evm.model.jcf7180002781697.190	0
102- 7:	XP_020252561.1	evm.model.jcf7180002781697.197	1e-57
102- 8:	XP_020272288.1	evm.model.jcf7180002781697.210	0
## Alignment 103: score=329.0 e_value=6.8e-11 N=7 NC_033794.1&jcf7180002781697 minus
103- 0:	XP_020272563.1	evm.model.jcf7180002781697.69	9e-45
103- 1:	XP_020272721.1	evm.model.jcf7180002781697.66	0
103- 2:	XP_020273635.1	evm.model.jcf7180002781697.59	5e-113
103- 3:	XP_020273532.1	evm.model.jcf7180002781697.57	6e-132
103- 4:	XP_020274106.1	evm.model.jcf7180002781697.41	5e-29
103- 5:	XP_020274312.1	evm.model.jcf7180002781697.31	0
103- 6:	XP_020266273.1	evm.model.jcf7180002781697.25	0
## Alignment 104: score=303.0 e_value=1.5e-13 N=7 NC_033794.1&jcf7180002781697 minus
104- 0:	XP_020262635.1	evm.model.jcf7180002781697.235	1e-175
104- 1:	XP_020268124.1	evm.model.jcf7180002781697.234	7e-74
104- 2:	XP_020251409.1	evm.model.jcf7180002781697.218	1e-93
104- 3:	XP_020251419.1	evm.model.jcf7180002781697.210	0
104- 4:	XP_020262823.1	evm.model.jcf7180002781697.208	0
104- 5:	XP_020251427.1	evm.model.jcf7180002781697.200	0
104- 6:	XP_020268182.1	evm.model.jcf7180002781697.197	2e-52
## Alignment 105: score=644.0 e_value=6.4e-35 N=14 NC_033794.1&jcf7180002781718 minus
105- 0:	XP_020276492.1	evm.model.jcf7180002781718.348	1e-171
105- 1:	XP_020276518.1	evm.model.jcf7180002781718.347	0
105- 2:	XP_020276531.1	evm.model.jcf7180002781718.341	0
105- 3:	XP_020276546.1	evm.model.jcf7180002781718.331	0
105- 4:	XP_020276586.1	evm.model.jcf7180002781718.322	3e-19
105- 5:	XP_020276715.1	evm.model.jcf7180002781718.309	1e-146
105- 6:	XP_020276772.1	evm.model.jcf7180002781718.301	6e-133
105- 7:	XP_020276780.1	evm.model.jcf7180002781718.300	1e-98
105- 8:	XP_020276799.1	evm.model.jcf7180002781718.290	3e-18
105- 9:	XP_020276804.1	evm.model.jcf7180002781718.286	2
105- 10:	XP_020276845.1	evm.model.jcf7180002781718.273	0
105- 11:	XP_020276875.1	evm.model.jcf7180002781718.268	9e-45
105- 12:	XP_020276900.1	evm.model.jcf7180002781718.267	0
105- 13:	XP_020260030.1	evm.model.jcf7180002781718.266	1e-97
## Alignment 106: score=306.0 e_value=1.8e-10 N=7 NC_033794.1&jcf7180002781718 minus
106- 0:	XP_020254051.1	evm.model.jcf7180002781718.211	6e-33
106- 1:	XP_020254075.1	evm.model.jcf7180002781718.208	0
106- 2:	XP_020241074.1	evm.model.jcf7180002781718.207	6e-24
106- 3:	XP_020241097.1	evm.model.jcf7180002781718.201	2e-31
106- 4:	XP_020241160.1	evm.model.jcf7180002781718.193	4e-53
106- 5:	XP_020241295.1	evm.model.jcf7180002781718.187	8e-41
106- 6:	XP_020254146.1	evm.model.jcf7180002781718.175	2e-124
## Alignment 107: score=313.0 e_value=5.2e-13 N=7 NC_033794.1&jcf7180002781727 plus
107- 0:	XP_020271786.1	evm.model.jcf7180002781727.11	2e-63
107- 1:	XP_020252401.1	evm.model.jcf7180002781727.13	0
107- 2:	XP_020271830.1	evm.model.jcf7180002781727.15	0
107- 3:	XP_020271865.1	evm.model.jcf7180002781727.19	9e-72
107- 4:	XP_020271917.1	evm.model.jcf7180002781727.23	5e-173
107- 5:	XP_020271976.1	evm.model.jcf7180002781727.48	3e-95
107- 6:	XP_020271984.1	evm.model.jcf7180002781727.54	1e-77
## Alignment 108: score=311.0 e_value=7.5e-15 N=7 NC_033795.1&jcf7180002718890 minus
108- 0:	XP_020254961.1	evm.model.jcf7180002718890.33	1e-19
108- 1:	XP_020254363.1	evm.model.jcf7180002718890.32	4e-163
108- 2:	XP_020254973.1	evm.model.jcf7180002718890.31	3e-51
108- 3:	XP_020254978.1	evm.model.jcf7180002718890.20	5e-134
108- 4:	XP_020254990.1	evm.model.jcf7180002718890.15	0
108- 5:	XP_020254367.1	evm.model.jcf7180002718890.12	0
108- 6:	XP_020254993.1	evm.model.jcf7180002718890.11	2e-13
## Alignment 109: score=330.0 e_value=5.6e-11 N=7 NC_033795.1&jcf7180002757809 plus
109- 0:	XP_020252065.1	evm.model.jcf7180002757809.106	7
109- 1:	XP_020252452.1	evm.model.jcf7180002757809.109	0
109- 2:	XP_020252454.1	evm.model.jcf7180002757809.110	4e-142
109- 3:	XP_020252467.1	evm.model.jcf7180002757809.116	1e-27
109- 4:	XP_020252067.1	evm.model.jcf7180002757809.121	8e-20
109- 5:	XP_020252473.1	evm.model.jcf7180002757809.124	0
109- 6:	XP_020252224.1	evm.model.jcf7180002757809.126	8e-06
## Alignment 110: score=348.0 e_value=1.8e-19 N=9 NC_033795.1&jcf7180002757809 minus
110- 0:	XP_020252520.1	evm.model.jcf7180002757809.90	1
110- 1:	XP_020252543.1	evm.model.jcf7180002757809.71	2e-13
110- 2:	XP_020252563.1	evm.model.jcf7180002757809.64	2e-175
110- 3:	XP_020252267.1	evm.model.jcf7180002757809.63	2e-131
110- 4:	XP_020252573.1	evm.model.jcf7180002757809.60	2e-152
110- 5:	XP_020252592.1	evm.model.jcf7180002757809.57	5e-50
110- 6:	XP_020252294.1	evm.model.jcf7180002757809.52	3e-28
110- 7:	XP_020252611.1	evm.model.jcf7180002757809.50	2e-84
110- 8:	XP_020252614.1	evm.model.jcf7180002757809.49	8e-65
## Alignment 111: score=462.0 e_value=1.6e-21 N=10 NC_033795.1&jcf7180002757812 minus
111- 0:	XP_020254363.1	evm.model.jcf7180002757812.152	3e-151
111- 1:	XP_020254973.1	evm.model.jcf7180002757812.151	0
111- 2:	XP_020254975.1	evm.model.jcf7180002757812.133	1e-123
111- 3:	XP_020254978.1	evm.model.jcf7180002757812.128	6e-134
111- 4:	XP_020254982.1	evm.model.jcf7180002757812.108	1e-123
111- 5:	XP_020254983.1	evm.model.jcf7180002757812.93	0
111- 6:	XP_020254990.1	evm.model.jcf7180002757812.82	0
111- 7:	XP_020254364.1	evm.model.jcf7180002757812.81	3e-53
111- 8:	XP_020254996.1	evm.model.jcf7180002757812.75	4e-132
111- 9:	XP_020254370.1	evm.model.jcf7180002757812.37	1e-26
## Alignment 112: score=303.0 e_value=2.3e-13 N=8 NC_033795.1&jcf7180002757818 plus
112- 0:	XP_020252286.1	evm.model.jcf7180002757818.2	8
112- 1:	XP_020252288.1	evm.model.jcf7180002757818.7	0
112- 2:	XP_020254654.1	evm.model.jcf7180002757818.29	7e-178
112- 3:	XP_020254274.1	evm.model.jcf7180002757818.32	3e-28
112- 4:	XP_020254679.1	evm.model.jcf7180002757818.41	4e-137
112- 5:	XP_020254681.1	evm.model.jcf7180002757818.43	2e-105
112- 6:	XP_020254698.1	evm.model.jcf7180002757818.57	1e-132
112- 7:	XP_020254714.1	evm.model.jcf7180002757818.66	2e-55
## Alignment 113: score=267.0 e_value=1.1e-09 N=6 NC_033795.1&jcf7180002757837 minus
113- 0:	XP_020253692.1	evm.model.jcf7180002757837.114	3e-17
113- 1:	XP_020253697.1	evm.model.jcf7180002757837.111	8e-82
113- 2:	XP_020252084.1	evm.model.jcf7180002757837.110	2e-17
113- 3:	XP_020252796.1	evm.model.jcf7180002757837.107	3e-35
113- 4:	XP_020252798.1	evm.model.jcf7180002757837.106	0
113- 5:	XP_020252085.1	evm.model.jcf7180002757837.99	0
## Alignment 114: score=348.0 e_value=8.7e-15 N=8 NC_033795.1&jcf7180002757844 minus
114- 0:	XP_020252631.1	evm.model.jcf7180002757844.65	0
114- 1:	XP_020252636.1	evm.model.jcf7180002757844.56	0
114- 2:	XP_020252638.1	evm.model.jcf7180002757844.55	9e-13
114- 3:	XP_020252642.1	evm.model.jcf7180002757844.52	3e-138
114- 4:	XP_020252652.1	evm.model.jcf7180002757844.41	1e-05
114- 5:	XP_020252659.1	evm.model.jcf7180002757844.29	2e-14
114- 6:	XP_020252664.1	evm.model.jcf7180002757844.25	3e-154
114- 7:	XP_020252682.1	evm.model.jcf7180002757844.5	1e-145
## Alignment 115: score=362.0 e_value=2.7e-17 N=8 NC_033795.1&jcf7180002757847 plus
115- 0:	XP_020253140.1	evm.model.jcf7180002757847.10	0
115- 1:	XP_020253144.1	evm.model.jcf7180002757847.11	0
115- 2:	XP_020252132.1	evm.model.jcf7180002757847.13	1e-94
115- 3:	XP_020253149.1	evm.model.jcf7180002757847.15	0
115- 4:	XP_020253158.1	evm.model.jcf7180002757847.24	0
115- 5:	XP_020253159.1	evm.model.jcf7180002757847.25	6e-63
115- 6:	XP_020253160.1	evm.model.jcf7180002757847.28	2e-145
115- 7:	XP_020252137.1	evm.model.jcf7180002757847.39	2e-08
## Alignment 116: score=261.0 e_value=3.3e-10 N=6 NC_033795.1&jcf7180002757849 minus
116- 0:	XP_020253224.1	evm.model.jcf7180002757849.43	3e-74
116- 1:	XP_020253232.1	evm.model.jcf7180002757849.38	3e-16
116- 2:	XP_020253234.1	evm.model.jcf7180002757849.35	0
116- 3:	XP_020253241.1	evm.model.jcf7180002757849.33	5e-63
116- 4:	XP_020253831.1	evm.model.jcf7180002757849.31	2e-172
116- 5:	XP_020253260.1	evm.model.jcf7180002757849.14	9e-70
## Alignment 117: score=479.0 e_value=4.7e-23 N=11 NC_033795.1&jcf7180002757850 plus
117- 0:	XP_020253245.1	evm.model.jcf7180002757850.4	0.2
117- 1:	XP_020253260.1	evm.model.jcf7180002757850.25	2e-65
117- 2:	XP_020253261.1	evm.model.jcf7180002757850.36	5e-162
117- 3:	XP_020253269.1	evm.model.jcf7180002757850.43	0
117- 4:	XP_020253842.1	evm.model.jcf7180002757850.45	1e-55
117- 5:	XP_020253272.1	evm.model.jcf7180002757850.49	2e-28
117- 6:	XP_020253275.1	evm.model.jcf7180002757850.53	0
117- 7:	XP_020253846.1	evm.model.jcf7180002757850.57	6e-75
117- 8:	XP_020253848.1	evm.model.jcf7180002757850.63	2e-109
117- 9:	XP_020253853.1	evm.model.jcf7180002757850.72	4e-95
117- 10:	XP_020253295.1	evm.model.jcf7180002757850.82	0
## Alignment 118: score=299.0 e_value=5.5e-12 N=7 NC_033795.1&jcf7180002757852 minus
118- 0:	XP_020254771.1	evm.model.jcf7180002757852.28	2e-25
118- 1:	XP_020254774.1	evm.model.jcf7180002757852.26	1e-47
118- 2:	XP_020254775.1	evm.model.jcf7180002757852.25	2e-91
118- 3:	XP_020254795.1	evm.model.jcf7180002757852.20	6e-44
118- 4:	XP_020254814.1	evm.model.jcf7180002757852.18	9e-130
118- 5:	XP_020252313.1	evm.model.jcf7180002757852.17	1e-54
118- 6:	XP_020252314.1	evm.model.jcf7180002757852.15	3e-59
## Alignment 119: score=262.0 e_value=8.1e-10 N=6 NC_033795.1&jcf7180002757863 plus
119- 0:	XP_020254677.1	evm.model.jcf7180002757863.8	2e-123
119- 1:	XP_020254679.1	evm.model.jcf7180002757863.14	7e-140
119- 2:	XP_020254682.1	evm.model.jcf7180002757863.30	1e-29
119- 3:	XP_020254686.1	evm.model.jcf7180002757863.31	9e-50
119- 4:	XP_020254690.1	evm.model.jcf7180002757863.49	2e-40
119- 5:	XP_020254701.1	evm.model.jcf7180002757863.84	0.2
## Alignment 120: score=1614.0 e_value=1e-120 N=35 NC_033795.1&jcf7180002757872 plus
120- 0:	XP_020254849.1	evm.model.jcf7180002757872.32	9e-31
120- 1:	XP_020254328.1	evm.model.jcf7180002757872.56	2e-24
120- 2:	XP_020254859.1	evm.model.jcf7180002757872.57	4e-81
120- 3:	XP_020254860.1	evm.model.jcf7180002757872.60	0
120- 4:	XP_020254868.1	evm.model.jcf7180002757872.63	3e-13
120- 5:	XP_020254875.1	evm.model.jcf7180002757872.66	0
120- 6:	XP_020254876.1	evm.model.jcf7180002757872.67	0
120- 7:	XP_020254877.1	evm.model.jcf7180002757872.70	0
120- 8:	XP_020254879.1	evm.model.jcf7180002757872.71	5e-126
120- 9:	XP_020254883.1	evm.model.jcf7180002757872.73	8e-57
120- 10:	XP_020254887.1	evm.model.jcf7180002757872.77	4e-138
120- 11:	XP_020254334.1	evm.model.jcf7180002757872.85	8e-120
120- 12:	XP_020254894.1	evm.model.jcf7180002757872.91	1e-40
120- 13:	XP_020254896.1	evm.model.jcf7180002757872.97	8e-119
120- 14:	XP_020254897.1	evm.model.jcf7180002757872.100	0
120- 15:	XP_020254903.1	evm.model.jcf7180002757872.102	7e-103
120- 16:	XP_020254906.1	evm.model.jcf7180002757872.108	5e-56
120- 17:	XP_020252326.1	evm.model.jcf7180002757872.113	5e-42
120- 18:	XP_020254909.1	evm.model.jcf7180002757872.115	2e-30
120- 19:	XP_020254912.1	evm.model.jcf7180002757872.118	8e-70
120- 20:	XP_020254915.1	evm.model.jcf7180002757872.119	0
120- 21:	XP_020254929.1	evm.model.jcf7180002757872.135	2e-66
120- 22:	XP_020254933.1	evm.model.jcf7180002757872.137	7e-142
120- 23:	XP_020254940.1	evm.model.jcf7180002757872.143	6e-128
120- 24:	XP_020254945.1	evm.model.jcf7180002757872.144	2e-63
120- 25:	XP_020254946.1	evm.model.jcf7180002757872.148	0
120- 26:	XP_020254341.1	evm.model.jcf7180002757872.152	0
120- 27:	XP_020254949.1	evm.model.jcf7180002757872.154	8e-61
120- 28:	XP_020254343.1	evm.model.jcf7180002757872.157	7e-16
120- 29:	XP_020254955.1	evm.model.jcf7180002757872.160	0
120- 30:	XP_020254344.1	evm.model.jcf7180002757872.162	4e-73
120- 31:	XP_020254957.1	evm.model.jcf7180002757872.165	9e-74
120- 32:	XP_020254350.1	evm.model.jcf7180002757872.171	7e-08
120- 33:	XP_020254363.1	evm.model.jcf7180002757872.173	1e-149
120- 34:	XP_020254973.1	evm.model.jcf7180002757872.174	1e-39
## Alignment 121: score=390.0 e_value=1.2e-15 N=8 NC_033795.1&jcf7180002758082 plus
121- 0:	XP_020252776.1	evm.model.jcf7180002758082.143	2e-104
121- 1:	XP_020252784.1	evm.model.jcf7180002758082.144	2e-141
121- 2:	XP_020252787.1	evm.model.jcf7180002758082.149	0
121- 3:	XP_020252788.1	evm.model.jcf7180002758082.150	2e-28
121- 4:	XP_020252083.1	evm.model.jcf7180002758082.152	1e-64
121- 5:	XP_020252789.1	evm.model.jcf7180002758082.155	0
121- 6:	XP_020252793.1	evm.model.jcf7180002758082.156	7e-75
121- 7:	XP_020252791.1	evm.model.jcf7180002758082.157	1e-138
## Alignment 122: score=313.0 e_value=3.9e-11 N=7 NC_033795.1&jcf7180002758083 minus
122- 0:	XP_020252597.1	evm.model.jcf7180002758083.29	0
122- 1:	XP_020252614.1	evm.model.jcf7180002758083.27	2e-73
122- 2:	XP_020252615.1	evm.model.jcf7180002758083.25	0
122- 3:	XP_020252300.1	evm.model.jcf7180002758083.22	2e-34
122- 4:	XP_020252621.1	evm.model.jcf7180002758083.12	5e-71
122- 5:	XP_020252303.1	evm.model.jcf7180002758083.7	2e-23
122- 6:	XP_020252631.1	evm.model.jcf7180002758083.2	0
## Alignment 123: score=315.0 e_value=4.6e-14 N=7 NC_033795.1&jcf7180002758172 plus
123- 0:	XP_020252576.1	evm.model.jcf7180002758172.1	0
123- 1:	XP_020252580.1	evm.model.jcf7180002758172.9	1e-132
123- 2:	XP_020252587.1	evm.model.jcf7180002758172.20	1e-102
123- 3:	XP_020252588.1	evm.model.jcf7180002758172.26	4e-52
123- 4:	XP_020252589.1	evm.model.jcf7180002758172.27	2e-90
123- 5:	XP_020252590.1	evm.model.jcf7180002758172.28	1e-120
123- 6:	XP_020252295.1	evm.model.jcf7180002758172.54	3e-153
## Alignment 124: score=362.0 e_value=3.8e-15 N=8 NC_033795.1&jcf7180002758172 minus
124- 0:	XP_020252551.1	evm.model.jcf7180002758172.59	0
124- 1:	XP_020252548.1	evm.model.jcf7180002758172.58	3e-33
124- 2:	XP_020252258.1	evm.model.jcf7180002758172.52	2e-38
124- 3:	XP_020252573.1	evm.model.jcf7180002758172.30	3e-27
124- 4:	XP_020252575.1	evm.model.jcf7180002758172.25	7e-63
124- 5:	XP_020252268.1	evm.model.jcf7180002758172.12	2e-41
124- 6:	XP_020252580.1	evm.model.jcf7180002758172.9	1e-132
124- 7:	XP_020252582.1	evm.model.jcf7180002758172.4	4e-72
## Alignment 125: score=283.0 e_value=2.3e-09 N=6 NC_033795.1&jcf7180002758962 plus
125- 0:	XP_020254975.1	evm.model.jcf7180002758962.31	8e-127
125- 1:	XP_020254978.1	evm.model.jcf7180002758962.56	8e-130
125- 2:	XP_020254982.1	evm.model.jcf7180002758962.59	3e-21
125- 3:	XP_020254983.1	evm.model.jcf7180002758962.65	0
125- 4:	XP_020254990.1	evm.model.jcf7180002758962.83	3e-35
125- 5:	XP_020254364.1	evm.model.jcf7180002758962.86	5e-53
## Alignment 126: score=316.0 e_value=2.4e-14 N=8 NC_033795.1&jcf7180002766322 plus
126- 0:	XP_020252288.1	evm.model.jcf7180002766322.4	0
126- 1:	XP_020254654.1	evm.model.jcf7180002766322.22	0
126- 2:	XP_020254274.1	evm.model.jcf7180002766322.26	4e-27
126- 3:	XP_020254679.1	evm.model.jcf7180002766322.32	1e-15
126- 4:	XP_020254284.1	evm.model.jcf7180002766322.33	2e-77
126- 5:	XP_020254681.1	evm.model.jcf7180002766322.34	5e-110
126- 6:	XP_020254698.1	evm.model.jcf7180002766322.46	0
126- 7:	XP_020254711.1	evm.model.jcf7180002766322.59	0
## Alignment 127: score=2067.0 e_value=6.8e-170 N=46 NC_033795.1&jcf7180002766344 minus
127- 0:	XP_020252416.1	evm.model.jcf7180002766344.375	0
127- 1:	XP_020252417.1	evm.model.jcf7180002766344.371	5e-55
127- 2:	XP_020252421.1	evm.model.jcf7180002766344.366	0
127- 3:	XP_020252427.1	evm.model.jcf7180002766344.365	9e-20
127- 4:	XP_020252428.1	evm.model.jcf7180002766344.364	2e-41
127- 5:	XP_020252062.1	evm.model.jcf7180002766344.363	3e-129
127- 6:	XP_020252439.1	evm.model.jcf7180002766344.361	0
127- 7:	XP_020252443.1	evm.model.jcf7180002766344.352	3e-134
127- 8:	XP_020252448.1	evm.model.jcf7180002766344.350	6e-108
127- 9:	XP_020252451.1	evm.model.jcf7180002766344.348	2e-09
127- 10:	XP_020252064.1	evm.model.jcf7180002766344.346	0.0002
127- 11:	XP_020252458.1	evm.model.jcf7180002766344.343	0
127- 12:	XP_020252471.1	evm.model.jcf7180002766344.336	7e-110
127- 13:	XP_020252474.1	evm.model.jcf7180002766344.334	0
127- 14:	XP_020252476.1	evm.model.jcf7180002766344.331	5e-13
127- 15:	XP_020252068.1	evm.model.jcf7180002766344.327	1e-13
127- 16:	XP_020252478.1	evm.model.jcf7180002766344.325	4e-80
127- 17:	XP_020252479.1	evm.model.jcf7180002766344.320	3e-102
127- 18:	XP_020252480.1	evm.model.jcf7180002766344.315	7e-40
127- 19:	XP_020252481.1	evm.model.jcf7180002766344.314	5e-28
127- 20:	XP_020252228.1	evm.model.jcf7180002766344.292	0
127- 21:	XP_020252484.1	evm.model.jcf7180002766344.286	1e-33
127- 22:	XP_020252232.1	evm.model.jcf7180002766344.284	9e-91
127- 23:	XP_020252491.1	evm.model.jcf7180002766344.276	0
127- 24:	XP_020252504.1	evm.model.jcf7180002766344.275	2e-111
127- 25:	XP_020252505.1	evm.model.jcf7180002766344.272	0
127- 26:	XP_020252237.1	evm.model.jcf7180002766344.267	0
127- 27:	XP_020252519.1	evm.model.jcf7180002766344.264	9e-109
127- 28:	XP_020252241.1	evm.model.jcf7180002766344.258	3e-82
127- 29:	XP_020252531.1	evm.model.jcf7180002766344.255	1e-16
127- 30:	XP_020252532.1	evm.model.jcf7180002766344.254	9e-29
127- 31:	XP_020252540.1	evm.model.jcf7180002766344.251	0
127- 32:	XP_020252256.1	evm.model.jcf7180002766344.221	3e-104
127- 33:	XP_020252556.1	evm.model.jcf7180002766344.207	2e-104
127- 34:	XP_020252558.1	evm.model.jcf7180002766344.201	1e-18
127- 35:	XP_020252569.1	evm.model.jcf7180002766344.198	6e-15
127- 36:	XP_020252267.1	evm.model.jcf7180002766344.195	9e-141
127- 37:	XP_020252268.1	evm.model.jcf7180002766344.171	8e-16
127- 38:	XP_020252280.1	evm.model.jcf7180002766344.165	3e-113
127- 39:	XP_020252603.1	evm.model.jcf7180002766344.154	2e-114
127- 40:	XP_020252290.1	evm.model.jcf7180002766344.152	2e-122
127- 41:	XP_020252294.1	evm.model.jcf7180002766344.150	9e-19
127- 42:	XP_020252614.1	evm.model.jcf7180002766344.149	2e-75
127- 43:	XP_020252615.1	evm.model.jcf7180002766344.144	2e-136
127- 44:	XP_020252300.1	evm.model.jcf7180002766344.141	4e-27
127- 45:	XP_020252302.1	evm.model.jcf7180002766344.140	3e-129
## Alignment 128: score=375.0 e_value=1.3e-19 N=9 NC_033795.1&jcf7180002766357 minus
128- 0:	XP_020253117.1	evm.model.jcf7180002766357.61	0
128- 1:	XP_020253127.1	evm.model.jcf7180002766357.58	0
128- 2:	XP_020253142.1	evm.model.jcf7180002766357.49	6e-30
128- 3:	XP_020253144.1	evm.model.jcf7180002766357.41	0
128- 4:	XP_020252132.1	evm.model.jcf7180002766357.40	3e-16
128- 5:	XP_020253151.1	evm.model.jcf7180002766357.37	6e-19
128- 6:	XP_020253162.1	evm.model.jcf7180002766357.33	0
128- 7:	XP_020252138.1	evm.model.jcf7180002766357.32	2e-24
128- 8:	XP_020253176.1	evm.model.jcf7180002766357.8	4e-45
## Alignment 129: score=350.0 e_value=4.8e-14 N=8 NC_033795.1&jcf7180002766392 plus
129- 0:	XP_020252635.1	evm.model.jcf7180002766392.84	0
129- 1:	XP_020252652.1	evm.model.jcf7180002766392.102	0.8
129- 2:	XP_020252655.1	evm.model.jcf7180002766392.107	9e-75
129- 3:	XP_020252658.1	evm.model.jcf7180002766392.109	9e-99
129- 4:	XP_020252661.1	evm.model.jcf7180002766392.118	0
129- 5:	XP_020252667.1	evm.model.jcf7180002766392.128	0
129- 6:	XP_020252670.1	evm.model.jcf7180002766392.133	6e-45
129- 7:	XP_020252682.1	evm.model.jcf7180002766392.141	2e-175
## Alignment 130: score=435.0 e_value=1.3e-20 N=10 NC_033795.1&jcf7180002766392 minus
130- 0:	XP_020252556.1	evm.model.jcf7180002766392.52	6e-107
130- 1:	XP_020252569.1	evm.model.jcf7180002766392.47	4e-09
130- 2:	XP_020252267.1	evm.model.jcf7180002766392.45	2e-139
130- 3:	XP_020252580.1	evm.model.jcf7180002766392.31	5e-21
130- 4:	XP_020252280.1	evm.model.jcf7180002766392.28	3e-87
130- 5:	XP_020252604.1	evm.model.jcf7180002766392.19	1e-84
130- 6:	XP_020252290.1	evm.model.jcf7180002766392.17	2e-74
130- 7:	XP_020252296.1	evm.model.jcf7180002766392.13	9e-76
130- 8:	XP_020252615.1	evm.model.jcf7180002766392.11	0
130- 9:	XP_020252302.1	evm.model.jcf7180002766392.8	1e-132
## Alignment 131: score=280.0 e_value=1.1e-08 N=6 NC_033795.1&jcf7180002766423 plus
131- 0:	XP_020254847.1	evm.model.jcf7180002766423.48	7e-89
131- 1:	XP_020254324.1	evm.model.jcf7180002766423.49	2e-50
131- 2:	XP_020254327.1	evm.model.jcf7180002766423.53	6e-31
131- 3:	XP_020254854.1	evm.model.jcf7180002766423.54	2e-107
131- 4:	XP_020254859.1	evm.model.jcf7180002766423.60	5e-27
131- 5:	XP_020254868.1	evm.model.jcf7180002766423.64	9e-42
## Alignment 132: score=965.0 e_value=6.1e-72 N=23 NC_033795.1&jcf7180002766423 minus
132- 0:	XP_020254305.1	evm.model.jcf7180002766423.142	0
132- 1:	XP_020254772.1	evm.model.jcf7180002766423.133	0
132- 2:	XP_020254775.1	evm.model.jcf7180002766423.129	4e-77
132- 3:	XP_020254790.1	evm.model.jcf7180002766423.116	0
132- 4:	XP_020252309.1	evm.model.jcf7180002766423.115	5e-41
132- 5:	XP_020254814.1	evm.model.jcf7180002766423.105	6e-21
132- 6:	XP_020254815.1	evm.model.jcf7180002766423.104	0
132- 7:	XP_020252314.1	evm.model.jcf7180002766423.100	3e-24
132- 8:	XP_020254819.1	evm.model.jcf7180002766423.97	0
132- 9:	XP_020254838.1	evm.model.jcf7180002766423.86	0
132- 10:	XP_020254839.1	evm.model.jcf7180002766423.84	0
132- 11:	XP_020254859.1	evm.model.jcf7180002766423.60	5e-27
132- 12:	XP_020254883.1	evm.model.jcf7180002766423.41	0
132- 13:	XP_020254894.1	evm.model.jcf7180002766423.34	0
132- 14:	XP_020254896.1	evm.model.jcf7180002766423.29	3e-118
132- 15:	XP_020254897.1	evm.model.jcf7180002766423.26	0
132- 16:	XP_020254903.1	evm.model.jcf7180002766423.24	4e-109
132- 17:	XP_020254906.1	evm.model.jcf7180002766423.19	2e-153
132- 18:	XP_020252326.1	evm.model.jcf7180002766423.12	3e-43
132- 19:	XP_020254908.1	evm.model.jcf7180002766423.11	0
132- 20:	XP_020254912.1	evm.model.jcf7180002766423.7	2e-30
132- 21:	XP_020254915.1	evm.model.jcf7180002766423.6	0
132- 22:	XP_020254917.1	evm.model.jcf7180002766423.5	3e-14
## Alignment 133: score=448.0 e_value=1.8e-20 N=10 NC_033795.1&jcf7180002766465 minus
133- 0:	XP_020252102.1	evm.model.jcf7180002766465.101	4e-45
133- 1:	XP_020252896.1	evm.model.jcf7180002766465.81	1e-76
133- 2:	XP_020252900.1	evm.model.jcf7180002766465.68	0
133- 3:	XP_020252911.1	evm.model.jcf7180002766465.56	1e-157
133- 4:	XP_020252918.1	evm.model.jcf7180002766465.41	6e-39
133- 5:	XP_020252921.1	evm.model.jcf7180002766465.29	0
133- 6:	XP_020252930.1	evm.model.jcf7180002766465.22	6e-46
133- 7:	XP_020252932.1	evm.model.jcf7180002766465.15	3e-180
133- 8:	XP_020252935.1	evm.model.jcf7180002766465.10	2e-29
133- 9:	XP_020252936.1	evm.model.jcf7180002766465.9	0
## Alignment 134: score=350.0 e_value=2.5e-16 N=8 NC_033795.1&jcf7180002766466 plus
134- 0:	XP_020253297.1	evm.model.jcf7180002766466.54	0
134- 1:	XP_020253305.1	evm.model.jcf7180002766466.83	4e-74
134- 2:	XP_020253319.1	evm.model.jcf7180002766466.101	0
134- 3:	XP_020252155.1	evm.model.jcf7180002766466.103	0
134- 4:	XP_020253323.1	evm.model.jcf7180002766466.107	1e-54
134- 5:	XP_020253324.1	evm.model.jcf7180002766466.109	3e-77
134- 6:	XP_020253325.1	evm.model.jcf7180002766466.111	1e-38
134- 7:	XP_020253336.1	evm.model.jcf7180002766466.127	0
## Alignment 135: score=630.0 e_value=1.6e-36 N=14 NC_033795.1&jcf7180002766482 minus
135- 0:	XP_020253910.1	evm.model.jcf7180002766482.58	3e-48
135- 1:	XP_020253457.1	evm.model.jcf7180002766482.56	0
135- 2:	XP_020253461.1	evm.model.jcf7180002766482.54	0
135- 3:	XP_020253466.1	evm.model.jcf7180002766482.52	0
135- 4:	XP_020252167.1	evm.model.jcf7180002766482.40	1e-63
135- 5:	XP_020252168.1	evm.model.jcf7180002766482.39	0.05
135- 6:	XP_020253480.1	evm.model.jcf7180002766482.36	9e-85
135- 7:	XP_020253482.1	evm.model.jcf7180002766482.34	4e-37
135- 8:	XP_020253483.1	evm.model.jcf7180002766482.32	5e-55
135- 9:	XP_020252170.1	evm.model.jcf7180002766482.23	4e-27
135- 10:	XP_020253489.1	evm.model.jcf7180002766482.19	9e-28
135- 11:	XP_020253490.1	evm.model.jcf7180002766482.18	5e-20
135- 12:	XP_020253495.1	evm.model.jcf7180002766482.16	3e-80
135- 13:	XP_020253513.1	evm.model.jcf7180002766482.7	8e-99
## Alignment 136: score=496.0 e_value=6.8e-25 N=11 NC_033795.1&jcf7180002766482 minus
136- 0:	XP_020252837.1	evm.model.jcf7180002766482.115	9e-77
136- 1:	XP_020252842.1	evm.model.jcf7180002766482.114	1e-24
136- 2:	XP_020252850.1	evm.model.jcf7180002766482.112	0
136- 3:	XP_020252851.1	evm.model.jcf7180002766482.111	3e-112
136- 4:	XP_020252856.1	evm.model.jcf7180002766482.101	7e-24
136- 5:	XP_020252857.1	evm.model.jcf7180002766482.100	0
136- 6:	XP_020252862.1	evm.model.jcf7180002766482.90	0.0003
136- 7:	XP_020252864.1	evm.model.jcf7180002766482.84	1e-151
136- 8:	XP_020252870.1	evm.model.jcf7180002766482.75	2e-96
136- 9:	XP_020252887.1	evm.model.jcf7180002766482.69	0
136- 10:	XP_020253737.1	evm.model.jcf7180002766482.66	5e-131
## Alignment 137: score=1102.0 e_value=7.3e-78 N=25 NC_033795.1&jcf7180002766493 minus
137- 0:	XP_020253127.1	evm.model.jcf7180002766493.240	8e-43
137- 1:	XP_020253129.1	evm.model.jcf7180002766493.232	3e-22
137- 2:	XP_020253131.1	evm.model.jcf7180002766493.216	0
137- 3:	XP_020253140.1	evm.model.jcf7180002766493.210	0
137- 4:	XP_020253144.1	evm.model.jcf7180002766493.208	0
137- 5:	XP_020253799.1	evm.model.jcf7180002766493.207	6e-93
137- 6:	XP_020252132.1	evm.model.jcf7180002766493.204	6e-48
137- 7:	XP_020253154.1	evm.model.jcf7180002766493.201	0
137- 8:	XP_020253155.1	evm.model.jcf7180002766493.195	2e-178
137- 9:	XP_020252137.1	evm.model.jcf7180002766493.180	3e-32
137- 10:	XP_020253810.1	evm.model.jcf7180002766493.176	8e-12
137- 11:	XP_020253182.1	evm.model.jcf7180002766493.129	5e-58
137- 12:	XP_020253184.1	evm.model.jcf7180002766493.127	1e-99
137- 13:	XP_020253202.1	evm.model.jcf7180002766493.116	2e-21
137- 14:	XP_020252141.1	evm.model.jcf7180002766493.100	0.1
137- 15:	XP_020253213.1	evm.model.jcf7180002766493.98	5e-22
137- 16:	XP_020252143.1	evm.model.jcf7180002766493.90	5e-68
137- 17:	XP_020253217.1	evm.model.jcf7180002766493.88	0
137- 18:	XP_020253220.1	evm.model.jcf7180002766493.86	1e-39
137- 19:	XP_020253221.1	evm.model.jcf7180002766493.81	0
137- 20:	XP_020253224.1	evm.model.jcf7180002766493.37	4e-85
137- 21:	XP_020253226.1	evm.model.jcf7180002766493.33	4e-102
137- 22:	XP_020252144.1	evm.model.jcf7180002766493.20	6e-34
137- 23:	XP_020253227.1	evm.model.jcf7180002766493.19	0
137- 24:	XP_020253232.1	evm.model.jcf7180002766493.15	5e-12
## Alignment 138: score=333.0 e_value=3e-12 N=7 NC_033795.1&jcf7180002766493 minus
138- 0:	XP_020253196.1	evm.model.jcf7180002766493.166	0
138- 1:	XP_020253197.1	evm.model.jcf7180002766493.161	1e-169
138- 2:	XP_020253204.1	evm.model.jcf7180002766493.146	2e-33
138- 3:	XP_020253205.1	evm.model.jcf7180002766493.142	7e-54
138- 4:	XP_020253206.1	evm.model.jcf7180002766493.141	4e-14
138- 5:	XP_020253821.1	evm.model.jcf7180002766493.135	2e-64
138- 6:	XP_020253209.1	evm.model.jcf7180002766493.131	1e-36
## Alignment 139: score=392.0 e_value=1e-16 N=9 NC_033795.1&jcf7180002766522 plus
139- 0:	XP_020252311.1	evm.model.jcf7180002766522.47	1e-09
139- 1:	XP_020252313.1	evm.model.jcf7180002766522.49	8e-41
139- 2:	XP_020252314.1	evm.model.jcf7180002766522.51	5e-57
139- 3:	XP_020254822.1	evm.model.jcf7180002766522.56	5e-16
139- 4:	XP_020254838.1	evm.model.jcf7180002766522.65	0
139- 5:	XP_020254839.1	evm.model.jcf7180002766522.66	0
139- 6:	XP_020254322.1	evm.model.jcf7180002766522.74	1e-113
139- 7:	XP_020254844.1	evm.model.jcf7180002766522.89	2e-76
139- 8:	XP_020254326.1	evm.model.jcf7180002766522.94	0
## Alignment 140: score=265.0 e_value=1.3e-10 N=6 NC_033795.1&jcf7180002766522 plus
140- 0:	XP_020254765.1	evm.model.jcf7180002766522.13	5e-32
140- 1:	XP_020254771.1	evm.model.jcf7180002766522.39	2e-139
140- 2:	XP_020254774.1	evm.model.jcf7180002766522.43	0
140- 3:	XP_020254775.1	evm.model.jcf7180002766522.44	8e-92
140- 4:	XP_020254777.1	evm.model.jcf7180002766522.46	3e-31
140- 5:	XP_020254795.1	evm.model.jcf7180002766522.47	2e-40
## Alignment 141: score=621.0 e_value=1.2e-36 N=14 NC_033795.1&jcf7180002766528 plus
141- 0:	XP_020253062.1	evm.model.jcf7180002766528.57	5e-15
141- 1:	XP_020252123.1	evm.model.jcf7180002766528.90	1e-13
141- 2:	XP_020253079.1	evm.model.jcf7180002766528.91	0
141- 3:	XP_020252125.1	evm.model.jcf7180002766528.93	4e-29
141- 4:	XP_020253089.1	evm.model.jcf7180002766528.103	4e-61
141- 5:	XP_020253092.1	evm.model.jcf7180002766528.107	1e-70
141- 6:	XP_020253783.1	evm.model.jcf7180002766528.109	1e-165
141- 7:	XP_020253093.1	evm.model.jcf7180002766528.110	9e-156
141- 8:	XP_020253101.1	evm.model.jcf7180002766528.118	2e-142
141- 9:	XP_020253103.1	evm.model.jcf7180002766528.122	7e-16
141- 10:	XP_020253105.1	evm.model.jcf7180002766528.128	8e-98
141- 11:	XP_020253111.1	evm.model.jcf7180002766528.129	2e-29
141- 12:	XP_020253119.1	evm.model.jcf7180002766528.142	2e-169
141- 13:	XP_020253125.1	evm.model.jcf7180002766528.149	0
## Alignment 142: score=719.0 e_value=1.7e-41 N=16 NC_033795.1&jcf7180002766528 minus
142- 0:	XP_020253374.1	evm.model.jcf7180002766528.70	3e-74
142- 1:	XP_020253384.1	evm.model.jcf7180002766528.68	1e-44
142- 2:	XP_020253388.1	evm.model.jcf7180002766528.64	0
142- 3:	XP_020253392.1	evm.model.jcf7180002766528.52	8e-28
142- 4:	XP_020252161.1	evm.model.jcf7180002766528.50	2e-70
142- 5:	XP_020253400.1	evm.model.jcf7180002766528.48	6e-50
142- 6:	XP_020253407.1	evm.model.jcf7180002766528.39	0
142- 7:	XP_020253414.1	evm.model.jcf7180002766528.37	2e-64
142- 8:	XP_020253415.1	evm.model.jcf7180002766528.31	0
142- 9:	XP_020253890.1	evm.model.jcf7180002766528.29	6e-52
142- 10:	XP_020253423.1	evm.model.jcf7180002766528.25	0
142- 11:	XP_020252163.1	evm.model.jcf7180002766528.17	5e-67
142- 12:	XP_020253434.1	evm.model.jcf7180002766528.13	2e-69
142- 13:	XP_020253440.1	evm.model.jcf7180002766528.9	9e-111
142- 14:	XP_020253442.1	evm.model.jcf7180002766528.8	8e-99
142- 15:	XP_020252165.1	evm.model.jcf7180002766528.6	7e-117
## Alignment 143: score=399.0 e_value=4.1e-19 N=9 NC_033795.1&jcf7180002766544 minus
143- 0:	XP_020252421.1	evm.model.jcf7180002766544.102	3e-64
143- 1:	XP_020252428.1	evm.model.jcf7180002766544.101	0
143- 2:	XP_020252062.1	evm.model.jcf7180002766544.100	2e-106
143- 3:	XP_020252439.1	evm.model.jcf7180002766544.97	2e-113
143- 4:	XP_020252443.1	evm.model.jcf7180002766544.92	6e-163
143- 5:	XP_020252448.1	evm.model.jcf7180002766544.90	1e-84
143- 6:	XP_020252451.1	evm.model.jcf7180002766544.86	2e-21
143- 7:	XP_020252458.1	evm.model.jcf7180002766544.81	0
143- 8:	XP_020252475.1	evm.model.jcf7180002766544.57	3e-29
## Alignment 144: score=777.0 e_value=2.2e-45 N=17 NC_033795.1&jcf7180002766560 minus
144- 0:	XP_020252423.1	evm.model.jcf7180002766560.100	0
144- 1:	XP_020252427.1	evm.model.jcf7180002766560.98	3e-63
144- 2:	XP_020252441.1	evm.model.jcf7180002766560.87	1e-73
144- 3:	XP_020252449.1	evm.model.jcf7180002766560.75	1e-157
144- 4:	XP_020252453.1	evm.model.jcf7180002766560.66	1e-58
144- 5:	XP_020252454.1	evm.model.jcf7180002766560.65	2e-143
144- 6:	XP_020252455.1	evm.model.jcf7180002766560.64	0
144- 7:	XP_020252460.1	evm.model.jcf7180002766560.63	3e-42
144- 8:	XP_020252462.1	evm.model.jcf7180002766560.62	0
144- 9:	XP_020252467.1	evm.model.jcf7180002766560.54	1e-114
144- 10:	XP_020252067.1	evm.model.jcf7180002766560.51	3e-10
144- 11:	XP_020252224.1	evm.model.jcf7180002766560.46	1e-88
144- 12:	XP_020252068.1	evm.model.jcf7180002766560.45	3e-42
144- 13:	XP_020252230.1	evm.model.jcf7180002766560.35	1e-147
144- 14:	XP_020252492.1	evm.model.jcf7180002766560.27	0
144- 15:	XP_020252493.1	evm.model.jcf7180002766560.26	3e-20
144- 16:	XP_020252504.1	evm.model.jcf7180002766560.24	1e-127
## Alignment 145: score=250.0 e_value=6.1e-06 N=5 NC_033795.1&jcf7180002766560 minus
145- 0:	XP_020252252.1	evm.model.jcf7180002766560.14	7e-75
145- 1:	XP_020252543.1	evm.model.jcf7180002766560.12	6e-12
145- 2:	XP_020252542.1	evm.model.jcf7180002766560.11	3e-53
145- 3:	XP_020252254.1	evm.model.jcf7180002766560.10	3e-17
145- 4:	XP_020252544.1	evm.model.jcf7180002766560.8	2e-66
## Alignment 146: score=418.0 e_value=1.1e-19 N=9 NC_033795.1&jcf7180002766563 plus
146- 0:	XP_020253211.1	evm.model.jcf7180002766563.309	4e-08
146- 1:	XP_020253224.1	evm.model.jcf7180002766563.339	5e-88
146- 2:	XP_020253826.1	evm.model.jcf7180002766563.340	4e-24
146- 3:	XP_020253225.1	evm.model.jcf7180002766563.341	8e-89
146- 4:	XP_020253226.1	evm.model.jcf7180002766563.344	0
146- 5:	XP_020252144.1	evm.model.jcf7180002766563.355	2e-21
146- 6:	XP_020253227.1	evm.model.jcf7180002766563.356	9e-59
146- 7:	XP_020253232.1	evm.model.jcf7180002766563.361	3e-17
146- 8:	XP_020253241.1	evm.model.jcf7180002766563.364	1e-67
## Alignment 147: score=260.0 e_value=4e-09 N=6 NC_033795.1&jcf7180002766563 minus
147- 0:	XP_020254975.1	evm.model.jcf7180002766563.70	2e-122
147- 1:	XP_020254978.1	evm.model.jcf7180002766563.66	2e-63
147- 2:	XP_020254983.1	evm.model.jcf7180002766563.61	0
147- 3:	XP_020254364.1	evm.model.jcf7180002766563.56	2e-47
147- 4:	XP_020255006.1	evm.model.jcf7180002766563.42	4e-92
147- 5:	XP_020255009.1	evm.model.jcf7180002766563.9	0
## Alignment 148: score=885.0 e_value=2e-52 N=19 NC_033795.1&jcf7180002766623 plus
148- 0:	XP_020253776.1	evm.model.jcf7180002766623.35	8e-94
148- 1:	XP_020253079.1	evm.model.jcf7180002766623.44	0
148- 2:	XP_020252125.1	evm.model.jcf7180002766623.45	2e-154
148- 3:	XP_020253778.1	evm.model.jcf7180002766623.49	4e-180
148- 4:	XP_020253092.1	evm.model.jcf7180002766623.57	7e-71
148- 5:	XP_020253783.1	evm.model.jcf7180002766623.61	6e-146
148- 6:	XP_020253093.1	evm.model.jcf7180002766623.62	7e-139
148- 7:	XP_020253095.1	evm.model.jcf7180002766623.64	0
148- 8:	XP_020253101.1	evm.model.jcf7180002766623.69	0
148- 9:	XP_020253104.1	evm.model.jcf7180002766623.81	6e-50
148- 10:	XP_020253105.1	evm.model.jcf7180002766623.82	0
148- 11:	XP_020253113.1	evm.model.jcf7180002766623.85	2e-144
148- 12:	XP_020253115.1	evm.model.jcf7180002766623.88	0
148- 13:	XP_020253119.1	evm.model.jcf7180002766623.101	3e-166
148- 14:	XP_020253125.1	evm.model.jcf7180002766623.103	5e-172
148- 15:	XP_020253127.1	evm.model.jcf7180002766623.105	1e-115
148- 16:	XP_020253128.1	evm.model.jcf7180002766623.110	3e-152
148- 17:	XP_020253130.1	evm.model.jcf7180002766623.113	0
148- 18:	XP_020253129.1	evm.model.jcf7180002766623.114	5e-72
## Alignment 149: score=309.0 e_value=3.4e-11 N=7 NC_033795.1&jcf7180002766623 minus
149- 0:	XP_020252159.1	evm.model.jcf7180002766623.31	8e-86
149- 1:	XP_020253366.1	evm.model.jcf7180002766623.27	0
149- 2:	XP_020253383.1	evm.model.jcf7180002766623.21	8e-51
149- 3:	XP_020253388.1	evm.model.jcf7180002766623.18	0
149- 4:	XP_020253390.1	evm.model.jcf7180002766623.12	0
149- 5:	XP_020253392.1	evm.model.jcf7180002766623.5	0
149- 6:	XP_020253400.1	evm.model.jcf7180002766623.2	0
## Alignment 150: score=551.0 e_value=1.5e-30 N=13 NC_033795.1&jcf7180002766630 minus
150- 0:	XP_020254326.1	evm.model.jcf7180002766630.58	0
150- 1:	XP_020254867.1	evm.model.jcf7180002766630.54	2e-93
150- 2:	XP_020254330.1	evm.model.jcf7180002766630.50	0
150- 3:	XP_020254884.1	evm.model.jcf7180002766630.49	2e-119
150- 4:	XP_020254896.1	evm.model.jcf7180002766630.41	6e-116
150- 5:	XP_020254338.1	evm.model.jcf7180002766630.38	0
150- 6:	XP_020254908.1	evm.model.jcf7180002766630.34	0
150- 7:	XP_020254909.1	evm.model.jcf7180002766630.33	2e-14
150- 8:	XP_020254915.1	evm.model.jcf7180002766630.31	8e-43
150- 9:	XP_020254924.1	evm.model.jcf7180002766630.27	0
150- 10:	XP_020254928.1	evm.model.jcf7180002766630.26	2e-175
150- 11:	XP_020254945.1	evm.model.jcf7180002766630.16	1e-32
150- 12:	XP_020254341.1	evm.model.jcf7180002766630.6	5e-07
## Alignment 151: score=600.0 e_value=4.7e-35 N=13 NC_033795.1&jcf7180002766655 plus
151- 0:	XP_020252592.1	evm.model.jcf7180002766655.4	9e-72
151- 1:	XP_020252287.1	evm.model.jcf7180002766655.5	0
151- 2:	XP_020252597.1	evm.model.jcf7180002766655.6	0
151- 3:	XP_020252605.1	evm.model.jcf7180002766655.8	2e-141
151- 4:	XP_020252290.1	evm.model.jcf7180002766655.10	1e-73
151- 5:	XP_020252294.1	evm.model.jcf7180002766655.11	2e-55
151- 6:	XP_020252607.1	evm.model.jcf7180002766655.12	2e-22
151- 7:	XP_020252295.1	evm.model.jcf7180002766655.13	0
151- 8:	XP_020252611.1	evm.model.jcf7180002766655.14	4e-145
151- 9:	XP_020252303.1	evm.model.jcf7180002766655.30	1e-27
151- 10:	XP_020252629.1	evm.model.jcf7180002766655.32	6e-21
151- 11:	XP_020252636.1	evm.model.jcf7180002766655.34	0
151- 12:	XP_020252644.1	evm.model.jcf7180002766655.42	7e-28
## Alignment 152: score=546.0 e_value=8e-33 N=13 NC_033795.1&jcf7180002766697 plus
152- 0:	XP_020253754.1	evm.model.jcf7180002766697.110	9e-23
152- 1:	XP_020252936.1	evm.model.jcf7180002766697.150	0.007
152- 2:	XP_020253755.1	evm.model.jcf7180002766697.153	0
152- 3:	XP_020252941.1	evm.model.jcf7180002766697.155	6e-25
152- 4:	XP_020252942.1	evm.model.jcf7180002766697.157	0
152- 5:	XP_020252952.1	evm.model.jcf7180002766697.182	9e-26
152- 6:	XP_020252953.1	evm.model.jcf7180002766697.191	1e-50
152- 7:	XP_020252108.1	evm.model.jcf7180002766697.197	6e-10
152- 8:	XP_020253759.1	evm.model.jcf7180002766697.198	2e-32
152- 9:	XP_020252973.1	evm.model.jcf7180002766697.209	0
152- 10:	XP_020252976.1	evm.model.jcf7180002766697.213	5e-43
152- 11:	XP_020252998.1	evm.model.jcf7180002766697.224	5e-36
152- 12:	XP_020253018.1	evm.model.jcf7180002766697.237	6e-155
## Alignment 153: score=269.0 e_value=1.4e-09 N=6 NC_033795.1&jcf7180002766697 plus
153- 0:	XP_020253305.1	evm.model.jcf7180002766697.49	9e-78
153- 1:	XP_020253319.1	evm.model.jcf7180002766697.64	5e-67
153- 2:	XP_020253321.1	evm.model.jcf7180002766697.65	2e-19
153- 3:	XP_020253863.1	evm.model.jcf7180002766697.69	0
153- 4:	XP_020253325.1	evm.model.jcf7180002766697.74	1e-49
153- 5:	XP_020253330.1	evm.model.jcf7180002766697.84	0
## Alignment 154: score=261.0 e_value=1.1e-08 N=6 NC_033795.1&jcf7180002766697 plus
154- 0:	XP_020252850.1	evm.model.jcf7180002766697.5	0
154- 1:	XP_020252851.1	evm.model.jcf7180002766697.6	8e-44
154- 2:	XP_020253730.1	evm.model.jcf7180002766697.21	0
154- 3:	XP_020252864.1	evm.model.jcf7180002766697.24	1e-25
154- 4:	XP_020252870.1	evm.model.jcf7180002766697.34	9e-114
154- 5:	XP_020253737.1	evm.model.jcf7180002766697.40	6e-145
## Alignment 155: score=353.0 e_value=4.9e-15 N=8 NC_033795.1&jcf7180002766697 minus
155- 0:	XP_020253739.1	evm.model.jcf7180002766697.268	3e-59
155- 1:	XP_020252102.1	evm.model.jcf7180002766697.261	5e-29
155- 2:	XP_020252895.1	evm.model.jcf7180002766697.258	2e-29
155- 3:	XP_020252907.1	evm.model.jcf7180002766697.245	0
155- 4:	XP_020252920.1	evm.model.jcf7180002766697.229	0
155- 5:	XP_020252921.1	evm.model.jcf7180002766697.222	1e-173
155- 6:	XP_020252930.1	evm.model.jcf7180002766697.217	2e-54
155- 7:	XP_020252933.1	evm.model.jcf7180002766697.214	2e-60
## Alignment 156: score=332.0 e_value=3.1e-11 N=7 NC_033795.1&jcf7180002766721 plus
156- 0:	XP_020252393.1	evm.model.jcf7180002766721.14	9e-100
156- 1:	XP_020252398.1	evm.model.jcf7180002766721.18	3e-21
156- 2:	XP_020252399.1	evm.model.jcf7180002766721.23	0
156- 3:	XP_020252407.1	evm.model.jcf7180002766721.25	7e-20
156- 4:	XP_020252208.1	evm.model.jcf7180002766721.28	3e-80
156- 5:	XP_020252209.1	evm.model.jcf7180002766721.30	7e-63
156- 6:	XP_020252409.1	evm.model.jcf7180002766721.31	4e-71
## Alignment 157: score=1362.0 e_value=3.6e-99 N=30 NC_033795.1&jcf7180002766751 minus
157- 0:	XP_020252327.1	evm.model.jcf7180002766751.134	2e-05
157- 1:	XP_020254922.1	evm.model.jcf7180002766751.133	0
157- 2:	XP_020254928.1	evm.model.jcf7180002766751.128	0
157- 3:	XP_020254929.1	evm.model.jcf7180002766751.127	2e-45
157- 4:	XP_020254940.1	evm.model.jcf7180002766751.118	2e-45
157- 5:	XP_020254341.1	evm.model.jcf7180002766751.109	0
157- 6:	XP_020254343.1	evm.model.jcf7180002766751.107	0
157- 7:	XP_020254955.1	evm.model.jcf7180002766751.106	3e-67
157- 8:	XP_020254344.1	evm.model.jcf7180002766751.104	7e-91
157- 9:	XP_020254345.1	evm.model.jcf7180002766751.102	1e-10
157- 10:	XP_020254957.1	evm.model.jcf7180002766751.98	0
157- 11:	XP_020254349.1	evm.model.jcf7180002766751.92	8e-39
157- 12:	XP_020254363.1	evm.model.jcf7180002766751.90	4e-150
157- 13:	XP_020254973.1	evm.model.jcf7180002766751.89	0
157- 14:	XP_020254974.1	evm.model.jcf7180002766751.87	3e-118
157- 15:	XP_020254979.1	evm.model.jcf7180002766751.81	1e-140
157- 16:	XP_020254983.1	evm.model.jcf7180002766751.78	0
157- 17:	XP_020254989.1	evm.model.jcf7180002766751.77	1e-37
157- 18:	XP_020254366.1	evm.model.jcf7180002766751.74	0
157- 19:	XP_020254367.1	evm.model.jcf7180002766751.72	0
157- 20:	XP_020252331.1	evm.model.jcf7180002766751.64	1e-18
157- 21:	XP_020254997.1	evm.model.jcf7180002766751.59	1e-116
157- 22:	XP_020255020.1	evm.model.jcf7180002766751.36	0
157- 23:	XP_020255017.1	evm.model.jcf7180002766751.34	1e-47
157- 24:	XP_020255021.1	evm.model.jcf7180002766751.28	2e-23
157- 25:	XP_020255026.1	evm.model.jcf7180002766751.27	5e-91
157- 26:	XP_020255030.1	evm.model.jcf7180002766751.22	0
157- 27:	XP_020255036.1	evm.model.jcf7180002766751.17	0
157- 28:	XP_020255043.1	evm.model.jcf7180002766751.10	2e-127
157- 29:	XP_020255044.1	evm.model.jcf7180002766751.7	2e-150
## Alignment 158: score=377.0 e_value=2.8e-14 N=8 NC_033795.1&jcf7180002766780 minus
158- 0:	XP_020252421.1	evm.model.jcf7180002766780.50	0
158- 1:	XP_020252422.1	evm.model.jcf7180002766780.49	1e-50
158- 2:	XP_020252423.1	evm.model.jcf7180002766780.47	0
158- 3:	XP_020252427.1	evm.model.jcf7180002766780.46	5e-50
158- 4:	XP_020252431.1	evm.model.jcf7180002766780.37	0
158- 5:	XP_020252441.1	evm.model.jcf7180002766780.21	8e-75
158- 6:	XP_020252443.1	evm.model.jcf7180002766780.15	1e-135
158- 7:	XP_020252063.1	evm.model.jcf7180002766780.8	5e-37
## Alignment 159: score=511.0 e_value=7.6e-29 N=12 NC_033795.1&jcf7180002766797 minus
159- 0:	XP_020252816.1	evm.model.jcf7180002766797.49	2e-29
159- 1:	XP_020252817.1	evm.model.jcf7180002766797.45	1e-180
159- 2:	XP_020253708.1	evm.model.jcf7180002766797.44	1e-28
159- 3:	XP_020252096.1	evm.model.jcf7180002766797.43	3
159- 4:	XP_020252837.1	evm.model.jcf7180002766797.39	6e-43
159- 5:	XP_020252856.1	evm.model.jcf7180002766797.38	0.06
159- 6:	XP_020252864.1	evm.model.jcf7180002766797.27	1e-180
159- 7:	XP_020252867.1	evm.model.jcf7180002766797.26	3e-46
159- 8:	XP_020253731.1	evm.model.jcf7180002766797.24	1e-33
159- 9:	XP_020252870.1	evm.model.jcf7180002766797.20	5e-66
159- 10:	XP_020253735.1	evm.model.jcf7180002766797.18	0
159- 11:	XP_020253737.1	evm.model.jcf7180002766797.14	4e-59
## Alignment 160: score=487.0 e_value=6.2e-24 N=11 NC_033795.1&jcf7180002766811 minus
160- 0:	XP_020252614.1	evm.model.jcf7180002766811.89	4e-18
160- 1:	XP_020252616.1	evm.model.jcf7180002766811.88	0
160- 2:	XP_020252300.1	evm.model.jcf7180002766811.87	2e-36
160- 3:	XP_020252303.1	evm.model.jcf7180002766811.74	1e-17
160- 4:	XP_020252636.1	evm.model.jcf7180002766811.63	0
160- 5:	XP_020252638.1	evm.model.jcf7180002766811.62	1e-103
160- 6:	XP_020252642.1	evm.model.jcf7180002766811.58	3e-145
160- 7:	XP_020252655.1	evm.model.jcf7180002766811.52	5e-58
160- 8:	XP_020252659.1	evm.model.jcf7180002766811.41	1e-94
160- 9:	XP_020252670.1	evm.model.jcf7180002766811.28	3e-79
160- 10:	XP_020252680.1	evm.model.jcf7180002766811.12	3e-73
## Alignment 161: score=366.0 e_value=4e-14 N=8 NC_033795.1&jcf7180002766811 minus
161- 0:	XP_020252552.1	evm.model.jcf7180002766811.133	0
161- 1:	XP_020252556.1	evm.model.jcf7180002766811.130	3e-111
161- 2:	XP_020252558.1	evm.model.jcf7180002766811.127	1e-81
161- 3:	XP_020252569.1	evm.model.jcf7180002766811.124	1e-72
161- 4:	XP_020252575.1	evm.model.jcf7180002766811.121	9e-47
161- 5:	XP_020252268.1	evm.model.jcf7180002766811.106	6e-41
161- 6:	XP_020252585.1	evm.model.jcf7180002766811.98	6e-27
161- 7:	XP_020252583.1	evm.model.jcf7180002766811.97	0
## Alignment 162: score=320.0 e_value=1.5e-10 N=7 NC_033795.1&jcf7180002766890 minus
162- 0:	XP_020252068.1	evm.model.jcf7180002766890.48	4e-12
162- 1:	XP_020252479.1	evm.model.jcf7180002766890.46	4e-126
162- 2:	XP_020252228.1	evm.model.jcf7180002766890.39	0
162- 3:	XP_020252484.1	evm.model.jcf7180002766890.34	3e-05
162- 4:	XP_020252491.1	evm.model.jcf7180002766890.24	0
162- 5:	XP_020252504.1	evm.model.jcf7180002766890.22	2e-132
162- 6:	XP_020252509.1	evm.model.jcf7180002766890.7	1e-58
## Alignment 163: score=1047.0 e_value=7.3e-72 N=24 NC_033795.1&jcf7180002766900 plus
163- 0:	XP_020252377.1	evm.model.jcf7180002766900.21	1e-31
163- 1:	XP_020252387.1	evm.model.jcf7180002766900.29	0
163- 2:	XP_020252407.1	evm.model.jcf7180002766900.33	1e-24
163- 3:	XP_020252060.1	evm.model.jcf7180002766900.45	3e-42
163- 4:	XP_020252422.1	evm.model.jcf7180002766900.47	1e-67
163- 5:	XP_020252427.1	evm.model.jcf7180002766900.50	8e-63
163- 6:	XP_020252441.1	evm.model.jcf7180002766900.63	4e-78
163- 7:	XP_020252443.1	evm.model.jcf7180002766900.66	3e-137
163- 8:	XP_020252063.1	evm.model.jcf7180002766900.67	1e-39
163- 9:	XP_020252451.1	evm.model.jcf7180002766900.68	0.06
163- 10:	XP_020252064.1	evm.model.jcf7180002766900.77	0.001
163- 11:	XP_020252453.1	evm.model.jcf7180002766900.78	2e-17
163- 12:	XP_020252454.1	evm.model.jcf7180002766900.80	5e-135
163- 13:	XP_020252460.1	evm.model.jcf7180002766900.85	8e-65
163- 14:	XP_020252465.1	evm.model.jcf7180002766900.89	2e-35
163- 15:	XP_020252068.1	evm.model.jcf7180002766900.104	7e-45
163- 16:	XP_020252230.1	evm.model.jcf7180002766900.118	4e-64
163- 17:	XP_020252493.1	evm.model.jcf7180002766900.127	3e-46
163- 18:	XP_020252504.1	evm.model.jcf7180002766900.129	4e-129
163- 19:	XP_020252505.1	evm.model.jcf7180002766900.130	0
163- 20:	XP_020252517.1	evm.model.jcf7180002766900.133	1e-100
163- 21:	XP_020252237.1	evm.model.jcf7180002766900.134	6e-145
163- 22:	XP_020252241.1	evm.model.jcf7180002766900.135	7e-94
163- 23:	XP_020252537.1	evm.model.jcf7180002766900.137	5e-44
## Alignment 164: score=323.0 e_value=4.4e-11 N=7 NC_033795.1&jcf7180002766926 minus
164- 0:	XP_020252555.1	evm.model.jcf7180002766926.29	4e-108
164- 1:	XP_020252258.1	evm.model.jcf7180002766926.24	1e-95
164- 2:	XP_020252563.1	evm.model.jcf7180002766926.22	0
164- 3:	XP_020252568.1	evm.model.jcf7180002766926.21	6e-22
164- 4:	XP_020252267.1	evm.model.jcf7180002766926.19	4e-110
164- 5:	XP_020252268.1	evm.model.jcf7180002766926.6	8e-36
164- 6:	XP_020252584.1	evm.model.jcf7180002766926.1	4e-155
## Alignment 165: score=798.0 e_value=4.7e-50 N=18 NC_033795.1&jcf7180002767059 minus
165- 0:	XP_020254350.1	evm.model.jcf7180002767059.101	4e-07
165- 1:	XP_020254363.1	evm.model.jcf7180002767059.99	1e-149
165- 2:	XP_020254973.1	evm.model.jcf7180002767059.98	1e-39
165- 3:	XP_020254981.1	evm.model.jcf7180002767059.94	1e-142
165- 4:	XP_020254983.1	evm.model.jcf7180002767059.87	0
165- 5:	XP_020254366.1	evm.model.jcf7180002767059.83	8e-54
165- 6:	XP_020254367.1	evm.model.jcf7180002767059.80	0
165- 7:	XP_020252331.1	evm.model.jcf7180002767059.70	3e-32
165- 8:	XP_020255002.1	evm.model.jcf7180002767059.55	0
165- 9:	XP_020255005.1	evm.model.jcf7180002767059.52	0
165- 10:	XP_020255007.1	evm.model.jcf7180002767059.46	1e-92
165- 11:	XP_020255016.1	evm.model.jcf7180002767059.43	0
165- 12:	XP_020255017.1	evm.model.jcf7180002767059.42	0
165- 13:	XP_020255026.1	evm.model.jcf7180002767059.33	5e-131
165- 14:	XP_020255030.1	evm.model.jcf7180002767059.22	0
165- 15:	XP_020255032.1	evm.model.jcf7180002767059.18	0
165- 16:	XP_020255036.1	evm.model.jcf7180002767059.15	0
165- 17:	XP_020255037.1	evm.model.jcf7180002767059.9	5e-38
## Alignment 166: score=287.0 e_value=2.7e-08 N=6 NC_033795.1&jcf7180002767120 minus
166- 0:	XP_020253706.1	evm.model.jcf7180002767120.76	1e-60
166- 1:	XP_020252086.1	evm.model.jcf7180002767120.75	2e-13
166- 2:	XP_020252813.1	evm.model.jcf7180002767120.71	5e-17
166- 3:	XP_020252816.1	evm.model.jcf7180002767120.69	7e-50
166- 4:	XP_020252817.1	evm.model.jcf7180002767120.65	0
166- 5:	XP_020252088.1	evm.model.jcf7180002767120.63	1e-49
## Alignment 167: score=617.0 e_value=8e-30 N=13 NC_033795.1&jcf7180002767136 plus
167- 0:	XP_020253269.1	evm.model.jcf7180002767136.5	2e-47
167- 1:	XP_020253842.1	evm.model.jcf7180002767136.7	2e-60
167- 2:	XP_020253271.1	evm.model.jcf7180002767136.11	0
167- 3:	XP_020253272.1	evm.model.jcf7180002767136.15	1e-149
167- 4:	XP_020253846.1	evm.model.jcf7180002767136.19	7e-23
167- 5:	XP_020253280.1	evm.model.jcf7180002767136.38	3e-84
167- 6:	XP_020253848.1	evm.model.jcf7180002767136.40	1e-107
167- 7:	XP_020253283.1	evm.model.jcf7180002767136.41	8e-13
167- 8:	XP_020253852.1	evm.model.jcf7180002767136.43	5e-72
167- 9:	XP_020253853.1	evm.model.jcf7180002767136.47	3e-94
167- 10:	XP_020253287.1	evm.model.jcf7180002767136.54	1e-75
167- 11:	XP_020253292.1	evm.model.jcf7180002767136.56	0
167- 12:	XP_020253295.1	evm.model.jcf7180002767136.58	0
## Alignment 168: score=549.0 e_value=1.7e-29 N=13 NC_033795.1&jcf7180002767183 plus
168- 0:	XP_020252391.1	evm.model.jcf7180002767183.1	0
168- 1:	XP_020252416.1	evm.model.jcf7180002767183.2	0
168- 2:	XP_020252417.1	evm.model.jcf7180002767183.5	9e-19
168- 3:	XP_020252427.1	evm.model.jcf7180002767183.10	4e-56
168- 4:	XP_020252439.1	evm.model.jcf7180002767183.11	0
168- 5:	XP_020252443.1	evm.model.jcf7180002767183.15	7e-159
168- 6:	XP_020252458.1	evm.model.jcf7180002767183.22	2e-96
168- 7:	XP_020252476.1	evm.model.jcf7180002767183.27	3e-13
168- 8:	XP_020252068.1	evm.model.jcf7180002767183.29	2e-13
168- 9:	XP_020252228.1	evm.model.jcf7180002767183.36	6e-90
168- 10:	XP_020252484.1	evm.model.jcf7180002767183.42	1e-08
168- 11:	XP_020252232.1	evm.model.jcf7180002767183.45	2e-81
168- 12:	XP_020252491.1	evm.model.jcf7180002767183.51	0
## Alignment 169: score=392.0 e_value=2.3e-17 N=9 NC_033795.1&jcf7180002767274 minus
169- 0:	XP_020252655.1	evm.model.jcf7180002767274.121	8e-70
169- 1:	XP_020252658.1	evm.model.jcf7180002767274.117	1e-17
169- 2:	XP_020252659.1	evm.model.jcf7180002767274.113	3e-129
169- 3:	XP_020252661.1	evm.model.jcf7180002767274.108	0
169- 4:	XP_020252667.1	evm.model.jcf7180002767274.99	0
169- 5:	XP_020252670.1	evm.model.jcf7180002767274.94	4e-27
169- 6:	XP_020252682.1	evm.model.jcf7180002767274.88	9e-169
169- 7:	XP_020252688.1	evm.model.jcf7180002767274.74	1e-175
169- 8:	XP_020252075.1	evm.model.jcf7180002767274.55	2e-26
## Alignment 170: score=254.0 e_value=3.7e-09 N=6 NC_033795.1&jcf7180002767380 plus
170- 0:	XP_020252540.1	evm.model.jcf7180002767380.5	0
170- 1:	XP_020252552.1	evm.model.jcf7180002767380.40	0
170- 2:	XP_020252558.1	evm.model.jcf7180002767380.46	2e-82
170- 3:	XP_020252569.1	evm.model.jcf7180002767380.53	2e-17
170- 4:	XP_020252572.1	evm.model.jcf7180002767380.54	0
170- 5:	XP_020252268.1	evm.model.jcf7180002767380.69	3e-41
## Alignment 171: score=307.0 e_value=3.3e-15 N=8 NC_033795.1&jcf7180002767386 minus
171- 0:	XP_020254822.1	evm.model.jcf7180002767386.23	0
171- 1:	XP_020254830.1	evm.model.jcf7180002767386.21	8e-125
171- 2:	XP_020254321.1	evm.model.jcf7180002767386.20	3e-19
171- 3:	XP_020254844.1	evm.model.jcf7180002767386.18	5e-99
171- 4:	XP_020254867.1	evm.model.jcf7180002767386.11	4e-104
171- 5:	XP_020254330.1	evm.model.jcf7180002767386.7	0
171- 6:	XP_020254896.1	evm.model.jcf7180002767386.2	7e-119
171- 7:	XP_020254338.1	evm.model.jcf7180002767386.1	7e-15
## Alignment 172: score=262.0 e_value=1.4e-08 N=6 NC_033795.1&jcf7180002767553 plus
172- 0:	XP_020254321.1	evm.model.jcf7180002767553.48	1e-17
172- 1:	XP_020254836.1	evm.model.jcf7180002767553.52	7e-51
172- 2:	XP_020254324.1	evm.model.jcf7180002767553.64	2e-99
172- 3:	XP_020254326.1	evm.model.jcf7180002767553.68	0
172- 4:	XP_020254861.1	evm.model.jcf7180002767553.78	0
172- 5:	XP_020254868.1	evm.model.jcf7180002767553.84	2e-36
## Alignment 173: score=363.0 e_value=2.2e-14 N=8 NC_033795.1&jcf7180002767559 minus
173- 0:	XP_020253834.1	evm.model.jcf7180002767559.65	8e-146
173- 1:	XP_020253840.1	evm.model.jcf7180002767559.51	1e-24
173- 2:	XP_020253842.1	evm.model.jcf7180002767559.47	3e-60
173- 3:	XP_020253843.1	evm.model.jcf7180002767559.40	1e-173
173- 4:	XP_020253271.1	evm.model.jcf7180002767559.37	0
173- 5:	XP_020253278.1	evm.model.jcf7180002767559.17	1e-54
173- 6:	XP_020253279.1	evm.model.jcf7180002767559.16	0
173- 7:	XP_020253286.1	evm.model.jcf7180002767559.8	1e-41
## Alignment 174: score=402.0 e_value=1.1e-17 N=9 NC_033795.1&jcf7180002767774 minus
174- 0:	XP_020252939.1	evm.model.jcf7180002767774.56	2e-36
174- 1:	XP_020252946.1	evm.model.jcf7180002767774.51	1e-12
174- 2:	XP_020252951.1	evm.model.jcf7180002767774.34	6e-56
174- 3:	XP_020252106.1	evm.model.jcf7180002767774.33	4e-81
174- 4:	XP_020252952.1	evm.model.jcf7180002767774.23	2e-21
174- 5:	XP_020252956.1	evm.model.jcf7180002767774.21	2e-57
174- 6:	XP_020252972.1	evm.model.jcf7180002767774.14	0.0009
174- 7:	XP_020252973.1	evm.model.jcf7180002767774.8	0
174- 8:	XP_020253762.1	evm.model.jcf7180002767774.5	5e-52
## Alignment 175: score=300.0 e_value=6.2e-12 N=7 NC_033795.1&jcf7180002767837 plus
175- 0:	XP_020254226.1	evm.model.jcf7180002767837.1	0
175- 1:	XP_020254544.1	evm.model.jcf7180002767837.9	0
175- 2:	XP_020254546.1	evm.model.jcf7180002767837.11	4e-25
175- 3:	XP_020254548.1	evm.model.jcf7180002767837.14	0
175- 4:	XP_020254562.1	evm.model.jcf7180002767837.21	4e-53
175- 5:	XP_020254569.1	evm.model.jcf7180002767837.25	1e-39
175- 6:	XP_020254582.1	evm.model.jcf7180002767837.57	0.02
## Alignment 176: score=315.0 e_value=3.5e-13 N=7 NC_033795.1&jcf7180002768052 plus
176- 0:	XP_020252669.1	evm.model.jcf7180002768052.4	4e-59
176- 1:	XP_020252330.1	evm.model.jcf7180002768052.9	6e-09
176- 2:	XP_020252675.1	evm.model.jcf7180002768052.11	3e-128
176- 3:	XP_020252678.1	evm.model.jcf7180002768052.18	4e-32
176- 4:	XP_020252679.1	evm.model.jcf7180002768052.19	4e-174
176- 5:	XP_020252688.1	evm.model.jcf7180002768052.21	2e-164
176- 6:	XP_020252698.1	evm.model.jcf7180002768052.23	1e-86
## Alignment 177: score=291.0 e_value=2.9e-13 N=7 NC_033795.1&jcf7180002768112 plus
177- 0:	XP_020254261.1	evm.model.jcf7180002768112.15	6e-15
177- 1:	XP_020252282.1	evm.model.jcf7180002768112.21	4e-41
177- 2:	XP_020254654.1	evm.model.jcf7180002768112.22	0
177- 3:	XP_020254658.1	evm.model.jcf7180002768112.23	0
177- 4:	XP_020254671.1	evm.model.jcf7180002768112.30	2e-51
177- 5:	XP_020254677.1	evm.model.jcf7180002768112.41	5e-110
177- 6:	XP_020254679.1	evm.model.jcf7180002768112.48	1e-143
## Alignment 178: score=420.0 e_value=7.4e-19 N=9 NC_033795.1&jcf7180002768964 plus
178- 0:	XP_020253415.1	evm.model.jcf7180002768964.3	3e-125
178- 1:	XP_020253418.1	evm.model.jcf7180002768964.4	3e-158
178- 2:	XP_020253890.1	evm.model.jcf7180002768964.5	2e-129
178- 3:	XP_020253420.1	evm.model.jcf7180002768964.6	4e-93
178- 4:	XP_020253423.1	evm.model.jcf7180002768964.8	5e-155
178- 5:	XP_020252163.1	evm.model.jcf7180002768964.17	2e-78
178- 6:	XP_020253434.1	evm.model.jcf7180002768964.20	3e-37
178- 7:	XP_020253442.1	evm.model.jcf7180002768964.23	3e-107
178- 8:	XP_020252165.1	evm.model.jcf7180002768964.24	1e-114
## Alignment 179: score=742.0 e_value=1.6e-45 N=17 NC_033795.1&jcf7180002770596 plus
179- 0:	XP_020254748.1	evm.model.jcf7180002770596.11	5
179- 1:	XP_020254757.1	evm.model.jcf7180002770596.15	3e-164
179- 2:	XP_020254758.1	evm.model.jcf7180002770596.18	5e-23
179- 3:	XP_020254768.1	evm.model.jcf7180002770596.21	4e-167
179- 4:	XP_020254771.1	evm.model.jcf7180002770596.23	0
179- 5:	XP_020254772.1	evm.model.jcf7180002770596.24	0
179- 6:	XP_020254775.1	evm.model.jcf7180002770596.27	1e-85
179- 7:	XP_020254790.1	evm.model.jcf7180002770596.40	0
179- 8:	XP_020252309.1	evm.model.jcf7180002770596.41	9e-42
179- 9:	XP_020252311.1	evm.model.jcf7180002770596.44	3e-15
179- 10:	XP_020254811.1	evm.model.jcf7180002770596.46	7e-25
179- 11:	XP_020254815.1	evm.model.jcf7180002770596.55	3e-156
179- 12:	XP_020252314.1	evm.model.jcf7180002770596.58	6e-45
179- 13:	XP_020254819.1	evm.model.jcf7180002770596.61	0
179- 14:	XP_020254319.1	evm.model.jcf7180002770596.71	3e-99
179- 15:	XP_020254321.1	evm.model.jcf7180002770596.82	1e-14
179- 16:	XP_020254847.1	evm.model.jcf7180002770596.96	1e-90
## Alignment 180: score=301.0 e_value=4.7e-14 N=7 NC_033795.1&jcf7180002774463 plus
180- 0:	XP_020254256.1	evm.model.jcf7180002774463.33	1e-27
180- 1:	XP_020254634.1	evm.model.jcf7180002774463.50	3e-22
180- 2:	XP_020252288.1	evm.model.jcf7180002774463.53	2e-144
180- 3:	XP_020254655.1	evm.model.jcf7180002774463.80	9e-33
180- 4:	XP_020254660.1	evm.model.jcf7180002774463.82	3e-143
180- 5:	XP_020254663.1	evm.model.jcf7180002774463.83	3e-121
180- 6:	XP_020254274.1	evm.model.jcf7180002774463.85	1e-31
## Alignment 181: score=707.0 e_value=4.5e-46 N=16 NC_033795.1&jcf7180002779179 plus
181- 0:	XP_020253910.1	evm.model.jcf7180002779179.81	5e-50
181- 1:	XP_020253461.1	evm.model.jcf7180002779179.86	0
181- 2:	XP_020253466.1	evm.model.jcf7180002779179.87	3e-108
181- 3:	XP_020253469.1	evm.model.jcf7180002779179.89	2e-40
181- 4:	XP_020253479.1	evm.model.jcf7180002779179.93	2e-17
181- 5:	XP_020252167.1	evm.model.jcf7180002779179.100	2e-66
181- 6:	XP_020253480.1	evm.model.jcf7180002779179.104	4e-178
181- 7:	XP_020253482.1	evm.model.jcf7180002779179.105	0
181- 8:	XP_020253483.1	evm.model.jcf7180002779179.108	7e-114
181- 9:	XP_020252170.1	evm.model.jcf7180002779179.113	3e-26
181- 10:	XP_020252172.1	evm.model.jcf7180002779179.118	2e-47
181- 11:	XP_020253489.1	evm.model.jcf7180002779179.119	0
181- 12:	XP_020253490.1	evm.model.jcf7180002779179.120	2e-56
181- 13:	XP_020253495.1	evm.model.jcf7180002779179.124	8e-26
181- 14:	XP_020253513.1	evm.model.jcf7180002779179.130	5e-78
181- 15:	XP_020253527.1	evm.model.jcf7180002779179.141	9e-24
## Alignment 182: score=288.0 e_value=2.4e-09 N=6 NC_033795.1&jcf7180002780758 plus
182- 0:	XP_020253062.1	evm.model.jcf7180002780758.23	5e-08
182- 1:	XP_020253063.1	evm.model.jcf7180002780758.27	2e-95
182- 2:	XP_020253064.1	evm.model.jcf7180002780758.33	9e-52
[truncated: 8,189 more rows]

## Sheet: Dioscorea vs Trichopus
Table S9C. Collinear genes between D. rotundata and T. zeylanicus
############### Parameters ###############
# MATCH_SCORE: 50
# MATCH_SIZE: 5
# GAP_PENALTY: -1
# OVERLAP_WINDOW: 5
# E_VALUE: 1e-05
# MAX GAPS: 25
############### Statistics ###############
# Number of collinear genes: 3025, Percentage: 5.79
# Number of all genes: 52265
##########################################
## Alignment 0: score=638.0 e_value=2e-36 N=15 Dr1&jcf7180002734023 minus
0- 0:	Dr05260	evm.model.jcf7180002734023.192	3e-23
0- 1:	Dr05277	evm.model.jcf7180002734023.153	3e-170
0- 2:	Dr05281	evm.model.jcf7180002734023.141	0
0- 3:	Dr05284	evm.model.jcf7180002734023.131	4e-23
0- 4:	Dr05285	evm.model.jcf7180002734023.129	3e-56
0- 5:	Dr05301	evm.model.jcf7180002734023.105	7e-33
0- 6:	Dr05308	evm.model.jcf7180002734023.96	0
0- 7:	Dr05312	evm.model.jcf7180002734023.89	0
0- 8:	Dr05319	evm.model.jcf7180002734023.85	8e-87
0- 9:	Dr05324	evm.model.jcf7180002734023.72	0
0- 10:	Dr05332	evm.model.jcf7180002734023.56	0
0- 11:	Dr05340	evm.model.jcf7180002734023.43	0
0- 12:	Dr05345	evm.model.jcf7180002734023.33	2e-55
0- 13:	Dr05365	evm.model.jcf7180002734023.12	2e-17
0- 14:	Dr05370	evm.model.jcf7180002734023.4	3e-24
## Alignment 1: score=304.0 e_value=0 N=7 Dr1&jcf7180002766366 minus
1- 0:	Dr16350	evm.model.jcf7180002766366.127	0
1- 1:	Dr16351	evm.model.jcf7180002766366.125	1e-22
1- 2:	Dr16356	evm.model.jcf7180002766366.116	3e-16
1- 3:	Dr16364	evm.model.jcf7180002766366.102	3e-69
1- 4:	Dr16365	evm.model.jcf7180002766366.99	2e-06
1- 5:	Dr16376	evm.model.jcf7180002766366.81	0
1- 6:	Dr16397	evm.model.jcf7180002766366.75	0
## Alignment 2: score=594.0 e_value=5.6e-35 N=14 Dr1&jcf7180002766393 plus
2- 0:	Dr05291	evm.model.jcf7180002766393.8	2e-118
2- 1:	Dr05297	evm.model.jcf7180002766393.12	3e-81
2- 2:	Dr05304	evm.model.jcf7180002766393.20	2e-122
2- 3:	Dr05305	evm.model.jcf7180002766393.22	0
2- 4:	Dr05307	evm.model.jcf7180002766393.24	3e-172
2- 5:	Dr05311	evm.model.jcf7180002766393.43	3e-13
2- 6:	Dr05321	evm.model.jcf7180002766393.48	3e-166
2- 7:	Dr05326	evm.model.jcf7180002766393.56	3e-116
2- 8:	Dr05331	evm.model.jcf7180002766393.61	4e-89
2- 9:	Dr05332	evm.model.jcf7180002766393.62	0
2- 10:	Dr05354	evm.model.jcf7180002766393.93	0
2- 11:	Dr05365	evm.model.jcf7180002766393.103	9e-80
2- 12:	Dr05374	evm.model.jcf7180002766393.116	0
2- 13:	Dr05400	evm.model.jcf7180002766393.136	0
## Alignment 3: score=418.0 e_value=9.6e-17 N=9 Dr1&jcf7180002766504 plus
3- 0:	Dr11721	evm.model.jcf7180002766504.4	1e-81
3- 1:	Dr11720	evm.model.jcf7180002766504.9	3e-118
3- 2:	Dr11718	evm.model.jcf7180002766504.12	2e-64
3- 3:	Dr11716	evm.model.jcf7180002766504.25	2e-49
3- 4:	Dr11713	evm.model.jcf7180002766504.35	5e-116
3- 5:	Dr11710	evm.model.jcf7180002766504.42	2e-151
3- 6:	Dr11706	evm.model.jcf7180002766504.47	1e-35
3- 7:	Dr11695	evm.model.jcf7180002766504.75	0
3- 8:	Dr11693	evm.model.jcf7180002766504.82	4e-29
## Alignment 4: score=435.0 e_value=2.9e-16 N=9 Dr1&jcf7180002767210 minus
4- 0:	Dr05207	evm.model.jcf7180002767210.122	0
4- 1:	Dr05208	evm.model.jcf7180002767210.116	1e-85
4- 2:	Dr05210	evm.model.jcf7180002767210.114	6e-81
4- 3:	Dr05212	evm.model.jcf7180002767210.112	1e-148
4- 4:	Dr05214	evm.model.jcf7180002767210.109	5e-179
4- 5:	Dr05218	evm.model.jcf7180002767210.106	2e-13
4- 6:	Dr05219	evm.model.jcf7180002767210.105	1e-117
4- 7:	Dr05222	evm.model.jcf7180002767210.99	1e-172
4- 8:	Dr05224	evm.model.jcf7180002767210.95	4e-153
## Alignment 5: score=631.0 e_value=2.4e-34 N=14 Dr1&jcf7180002767519 minus
5- 0:	Dr16349	evm.model.jcf7180002767519.113	7e-30
5- 1:	Dr16355	evm.model.jcf7180002767519.100	8e-29
5- 2:	Dr16356	evm.model.jcf7180002767519.90	8e-40
5- 3:	Dr16357	evm.model.jcf7180002767519.89	6e-85
5- 4:	Dr16363	evm.model.jcf7180002767519.85	3e-12
5- 5:	Dr16370	evm.model.jcf7180002767519.78	2e-36
5- 6:	Dr16375	evm.model.jcf7180002767519.66	8e-156
5- 7:	Dr16376	evm.model.jcf7180002767519.63	0
5- 8:	Dr16396	evm.model.jcf7180002767519.59	0
5- 9:	Dr16399	evm.model.jcf7180002767519.48	3e-38
5- 10:	Dr16403	evm.model.jcf7180002767519.41	4e-63
5- 11:	Dr16404	evm.model.jcf7180002767519.38	7e-119
5- 12:	Dr16407	evm.model.jcf7180002767519.36	3e-54
5- 13:	Dr16411	evm.model.jcf7180002767519.20	0
## Alignment 6: score=306.0 e_value=4.7e-14 N=7 Dr1&jcf7180002767829 plus
6- 0:	Dr05230	evm.model.jcf7180002767829.22	8e-42
6- 1:	Dr05231	evm.model.jcf7180002767829.23	7e-54
6- 2:	Dr05244	evm.model.jcf7180002767829.24	2e-39
6- 3:	Dr05260	evm.model.jcf7180002767829.29	2e-23
6- 4:	Dr05263	evm.model.jcf7180002767829.33	3e-156
6- 5:	Dr05265	evm.model.jcf7180002767829.43	7e-07
6- 6:	Dr05272	evm.model.jcf7180002767829.56	1e-93
## Alignment 7: score=261.0 e_value=2.8e-10 N=6 Dr1&jcf7180002781324 plus
7- 0:	Dr11864	evm.model.jcf7180002781324.91	7e-16
7- 1:	Dr11847	evm.model.jcf7180002781324.120	4e-47
7- 2:	Dr11842	evm.model.jcf7180002781324.124	4e-72
7- 3:	Dr11830	evm.model.jcf7180002781324.144	6e-39
7- 4:	Dr11828	evm.model.jcf7180002781324.149	7e-52
7- 5:	Dr11827	evm.model.jcf7180002781324.157	1e-39
## Alignment 8: score=321.0 e_value=9.3e-13 N=7 Dr1&jcf7180002781679 plus
8- 0:	Dr11729	evm.model.jcf7180002781679.401	6e-93
8- 1:	Dr11726	evm.model.jcf7180002781679.407	1e-11
8- 2:	Dr11713	evm.model.jcf7180002781679.422	2e-85
8- 3:	Dr11709	evm.model.jcf7180002781679.423	2e-16
8- 4:	Dr11702	evm.model.jcf7180002781679.435	2e-81
8- 5:	Dr11700	evm.model.jcf7180002781679.441	4e-73
8- 6:	Dr11699	evm.model.jcf7180002781679.444	1e-09
## Alignment 9: score=323.0 e_value=2.9e-14 N=7 Dr10&jcf7180002757847 minus
9- 0:	Dr06065	evm.model.jcf7180002757847.66	0
9- 1:	Dr06067	evm.model.jcf7180002757847.61	2e-100
9- 2:	Dr06068	evm.model.jcf7180002757847.60	5e-27
9- 3:	Dr06069	evm.model.jcf7180002757847.58	1e-30
9- 4:	Dr06070	evm.model.jcf7180002757847.54	0
9- 5:	Dr06079	evm.model.jcf7180002757847.28	4e-110
9- 6:	Dr06086	evm.model.jcf7180002757847.10	0
## Alignment 10: score=551.0 e_value=5.7e-26 N=12 Dr10&jcf7180002759590 plus
10- 0:	Dr08302	evm.model.jcf7180002759590.3	0
10- 1:	Dr08300	evm.model.jcf7180002759590.7	0
10- 2:	Dr08288	evm.model.jcf7180002759590.14	9e-91
10- 3:	Dr08283	evm.model.jcf7180002759590.19	4e-33
10- 4:	Dr08279	evm.model.jcf7180002759590.20	0
10- 5:	Dr08277	evm.model.jcf7180002759590.23	3e-136
10- 6:	Dr08275	evm.model.jcf7180002759590.27	8e-89
10- 7:	Dr08272	evm.model.jcf7180002759590.28	1e-109
10- 8:	Dr08267	evm.model.jcf7180002759590.36	0
10- 9:	Dr08257	evm.model.jcf7180002759590.60	0
10- 10:	Dr08255	evm.model.jcf7180002759590.66	7e-153
10- 11:	Dr08248	evm.model.jcf7180002759590.77	0
## Alignment 11: score=413.0 e_value=1.4e-17 N=9 Dr10&jcf7180002766357 plus
11- 0:	Dr14280	evm.model.jcf7180002766357.28	6e-60
11- 1:	Dr06060	evm.model.jcf7180002766357.32	0
11- 2:	Dr06063	evm.model.jcf7180002766357.33	5e-80
11- 3:	Dr06073	evm.model.jcf7180002766357.38	0
11- 4:	Dr06082	evm.model.jcf7180002766357.42	1e-32
11- 5:	Dr06083	evm.model.jcf7180002766357.47	0
11- 6:	Dr06084	evm.model.jcf7180002766357.49	8e-110
11- 7:	Dr06087	evm.model.jcf7180002766357.53	9e-43
11- 8:	Dr06098	evm.model.jcf7180002766357.61	0
## Alignment 12: score=460.0 e_value=2.3e-23 N=11 Dr10&jcf7180002766466 minus
12- 0:	Dr07735	evm.model.jcf7180002766466.130	0
12- 1:	Dr07729	evm.model.jcf7180002766466.125	9e-43
12- 2:	Dr07728	evm.model.jcf7180002766466.120	1e-77
12- 3:	Dr07712	evm.model.jcf7180002766466.87	2e-44
12- 4:	Dr07705	evm.model.jcf7180002766466.61	3e-45
12- 5:	Dr07694	evm.model.jcf7180002766466.52	4e-30
12- 6:	Dr07668	evm.model.jcf7180002766466.32	8e-89
12- 7:	Dr07663	evm.model.jcf7180002766466.27	0
12- 8:	Dr07661	evm.model.jcf7180002766466.22	6e-12
12- 9:	Dr07657	evm.model.jcf7180002766466.10	3e-58
12- 10:	Dr07656	evm.model.jcf7180002766466.3	0
## Alignment 13: score=285.0 e_value=9.7e-09 N=6 Dr10&jcf7180002766489 plus
13- 0:	Dr08255	evm.model.jcf7180002766489.68	4e-157
13- 1:	Dr08249	evm.model.jcf7180002766489.71	2e-57
13- 2:	Dr08248	evm.model.jcf7180002766489.74	9e-73
13- 3:	Dr08247	evm.model.jcf7180002766489.76	1e-61
13- 4:	Dr08241	evm.model.jcf7180002766489.82	2e-54
13- 5:	Dr08236	evm.model.jcf7180002766489.91	1e-54
## Alignment 14: score=700.0 e_value=1.1e-42 N=16 Dr10&jcf7180002766493 plus
14- 0:	Dr14210	evm.model.jcf7180002766493.3	2e-83
14- 1:	Dr14211	evm.model.jcf7180002766493.5	2e-99
14- 2:	Dr14213	evm.model.jcf7180002766493.7	7e-28
14- 3:	Dr14228	evm.model.jcf7180002766493.33	4e-120
14- 4:	Dr14230	evm.model.jcf7180002766493.41	2e-117
14- 5:	Dr14232	evm.model.jcf7180002766493.50	0
14- 6:	Dr14244	evm.model.jcf7180002766493.98	2e-87
14- 7:	Dr14249	evm.model.jcf7180002766493.110	0
14- 8:	Dr14250	evm.model.jcf7180002766493.113	2e-39
14- 9:	Dr14257	evm.model.jcf7180002766493.115	0
14- 10:	Dr14264	evm.model.jcf7180002766493.128	2e-62
14- 11:	Dr14267	evm.model.jcf7180002766493.133	1e-126
14- 12:	Dr14275	evm.model.jcf7180002766493.156	8e-55
14- 13:	Dr14277	evm.model.jcf7180002766493.163	8e-129
14- 14:	Dr14280	evm.model.jcf7180002766493.170	4e-26
14- 15:	Dr06072	evm.model.jcf7180002766493.196	4e-21
## Alignment 15: score=343.0 e_value=4.3e-15 N=8 Dr10&jcf7180002766528 minus
15- 0:	Dr21689	evm.model.jcf7180002766528.146	2e-98
15- 1:	Dr21680	evm.model.jcf7180002766528.125	3e-68
15- 2:	Dr21672	evm.model.jcf7180002766528.108	7e-22
15- 3:	Dr21665	evm.model.jcf7180002766528.107	2e-17
15- 4:	Dr21661	evm.model.jcf7180002766528.87	2e-19
15- 5:	Dr21659	evm.model.jcf7180002766528.80	2e-138
15- 6:	Dr21654	evm.model.jcf7180002766528.74	0
15- 7:	Dr21640	evm.model.jcf7180002766528.52	9e-48
## Alignment 16: score=362.0 e_value=2e-18 N=8 Dr10&jcf7180002766623 minus
16- 0:	Dr21690	evm.model.jcf7180002766623.84	6e-49
16- 1:	Dr21681	evm.model.jcf7180002766623.63	2e-89
16- 2:	Dr21680	evm.model.jcf7180002766623.61	2e-71
16- 3:	Dr21662	evm.model.jcf7180002766623.35	2e-77
16- 4:	Dr21661	evm.model.jcf7180002766623.32	0
16- 5:	Dr21655	evm.model.jcf7180002766623.18	0
16- 6:	Dr21654	evm.model.jcf7180002766623.17	3e-67
16- 7:	Dr21653	evm.model.jcf7180002766623.14	0
## Alignment 17: score=283.0 e_value=5.2e-11 N=7 Dr10&jcf7180002766697 minus
17- 0:	Dr21997	evm.model.jcf7180002766697.153	6e-42
17- 1:	Dr18346	evm.model.jcf7180002766697.106	4e-17
17- 2:	Dr07729	evm.model.jcf7180002766697.83	1e-22
17- 3:	Dr07723	evm.model.jcf7180002766697.76	2e-147
17- 4:	Dr07720	evm.model.jcf7180002766697.70	5e-71
17- 5:	Dr07710	evm.model.jcf7180002766697.49	5e-11
17- 6:	Dr07697	evm.model.jcf7180002766697.21	3e-13
## Alignment 18: score=290.0 e_value=1.3e-09 N=6 Dr10&jcf7180002769151 minus
18- 0:	Dr08297	evm.model.jcf7180002769151.25	2e-54
18- 1:	Dr08296	evm.model.jcf7180002769151.23	1e-141
18- 2:	Dr08295	evm.model.jcf7180002769151.17	4e-52
18- 3:	Dr08291	evm.model.jcf7180002769151.11	4e-42
18- 4:	Dr08287	evm.model.jcf7180002769151.6	2e-61
18- 5:	Dr08285	evm.model.jcf7180002769151.4	0
## Alignment 19: score=615.0 e_value=1.1e-35 N=14 Dr10&jcf7180002781730 minus
19- 0:	Dr08297	evm.model.jcf7180002781730.141	0
19- 1:	Dr08288	evm.model.jcf7180002781730.125	8e-80
19- 2:	Dr08287	evm.model.jcf7180002781730.123	1e-150
19- 3:	Dr08283	evm.model.jcf7180002781730.121	4e-73
19- 4:	Dr08282	evm.model.jcf7180002781730.120	0
19- 5:	Dr08268	evm.model.jcf7180002781730.88	2e-82
19- 6:	Dr08249	evm.model.jcf7180002781730.56	6e-142
19- 7:	Dr08246	evm.model.jcf7180002781730.49	6e-59
19- 8:	Dr08241	evm.model.jcf7180002781730.45	9e-77
19- 9:	Dr08240	evm.model.jcf7180002781730.42	4e-17
19- 10:	Dr08238	evm.model.jcf7180002781730.38	2e-106
19- 11:	Dr08236	evm.model.jcf7180002781730.34	5e-57
19- 12:	Dr08212	evm.model.jcf7180002781730.13	4e-26
19- 13:	Dr08206	evm.model.jcf7180002781730.1	1e-59
## Alignment 20: score=522.0 e_value=2.2e-28 N=12 Dr10&jcf7180002781929 plus
20- 0:	Dr14222	evm.model.jcf7180002781929.136	3e-22
20- 1:	Dr14225	evm.model.jcf7180002781929.140	4e-35
20- 2:	Dr14232	evm.model.jcf7180002781929.149	0
20- 3:	Dr14233	evm.model.jcf7180002781929.150	7e-62
20- 4:	Dr14234	evm.model.jcf7180002781929.153	2e-14
20- 5:	Dr14240	evm.model.jcf7180002781929.156	1e-38
20- 6:	Dr14250	evm.model.jcf7180002781929.163	7e-57
20- 7:	Dr14257	evm.model.jcf7180002781929.168	0
20- 8:	Dr14280	evm.model.jcf7180002781929.187	2e-67
20- 9:	Dr06080	evm.model.jcf7180002781929.194	0
20- 10:	Dr06084	evm.model.jcf7180002781929.201	1e-36
20- 11:	Dr06085	evm.model.jcf7180002781929.203	1e-68
## Alignment 21: score=532.0 e_value=3.2e-26 N=12 Dr11&jcf7180002767210 plus
21- 0:	Dr01624	evm.model.jcf7180002767210.49	2e-55
21- 1:	Dr01625	evm.model.jcf7180002767210.53	0
21- 2:	Dr01634	evm.model.jcf7180002767210.66	0
21- 3:	Dr01652	evm.model.jcf7180002767210.74	0
21- 4:	Dr01656	evm.model.jcf7180002767210.76	0
21- 5:	Dr01660	evm.model.jcf7180002767210.82	0
21- 6:	Dr01664	evm.model.jcf7180002767210.91	0
21- 7:	Dr01684	evm.model.jcf7180002767210.95	2e-160
21- 8:	Dr01686	evm.model.jcf7180002767210.102	2e-107
21- 9:	Dr01689	evm.model.jcf7180002767210.106	1e-14
21- 10:	Dr01694	evm.model.jcf7180002767210.109	0
21- 11:	Dr01696	evm.model.jcf7180002767210.112	1e-137
## Alignment 22: score=314.0 e_value=5.3e-11 N=7 Dr11&jcf7180002767265 plus
22- 0:	Dr01623	evm.model.jcf7180002767265.22	0
22- 1:	Dr01632	evm.model.jcf7180002767265.37	1e-06
22- 2:	Dr01633	evm.model.jcf7180002767265.43	3e-69
22- 3:	Dr01647	evm.model.jcf7180002767265.47	2e-12
22- 4:	Dr01651	evm.model.jcf7180002767265.49	6e-14
22- 5:	Dr01656	evm.model.jcf7180002767265.56	7e-56
22- 6:	Dr01661	evm.model.jcf7180002767265.64	1e-21
## Alignment 23: score=390.0 e_value=3.2e-18 N=9 Dr11&jcf7180002781324 minus
23- 0:	Dr08774	evm.model.jcf7180002781324.184	1e-14
23- 1:	Dr08782	evm.model.jcf7180002781324.168	0
23- 2:	Dr08791	evm.model.jcf7180002781324.144	1e-44
23- 3:	Dr08792	evm.model.jcf7180002781324.142	6e-23
23- 4:	Dr08803	evm.model.jcf7180002781324.132	5e-66
23- 5:	Dr08814	evm.model.jcf7180002781324.117	2e-169
23- 6:	Dr08817	evm.model.jcf7180002781324.106	3e-151
23- 7:	Dr08829	evm.model.jcf7180002781324.94	2e-116
23- 8:	Dr08830	evm.model.jcf7180002781324.91	4e-15
## Alignment 24: score=314.0 e_value=4.2e-11 N=7 Dr11&jcf7180002781722 minus
24- 0:	Dr00045	evm.model.jcf7180002781722.50	2e-53
24- 1:	Dr00039	evm.model.jcf7180002781722.47	4e-78
24- 2:	Dr00026	evm.model.jcf7180002781722.29	3e-160
24- 3:	Dr00021	evm.model.jcf7180002781722.26	0
24- 4:	Dr00019	evm.model.jcf7180002781722.16	1e-11
24- 5:	Dr00010	evm.model.jcf7180002781722.9	0
24- 6:	Dr00005	evm.model.jcf7180002781722.2	9e-92
## Alignment 25: score=265.0 e_value=8.7e-10 N=6 Dr12&jcf7180002757818 plus
25- 0:	Dr09114	evm.model.jcf7180002757818.5	5e-17
25- 1:	Dr09116	evm.model.jcf7180002757818.11	4e-98
25- 2:	Dr09122	evm.model.jcf7180002757818.20	0
25- 3:	Dr09140	evm.model.jcf7180002757818.52	4e-108
25- 4:	Dr09142	evm.model.jcf7180002757818.54	2e-16
25- 5:	Dr09144	evm.model.jcf7180002757818.67	9e-135
## Alignment 26: score=261.0 e_value=1.1e-07 N=6 Dr12&jcf7180002757818 plus
26- 0:	Dr09173	evm.model.jcf7180002757818.136	6e-125
26- 1:	Dr09175	evm.model.jcf7180002757818.152	1e-73
26- 2:	Dr09182	evm.model.jcf7180002757818.172	3e-69
26- 3:	Dr09187	evm.model.jcf7180002757818.183	0
26- 4:	Dr09192	evm.model.jcf7180002757818.191	0
26- 5:	Dr09197	evm.model.jcf7180002757818.206	4e-31
## Alignment 27: score=323.0 e_value=4e-11 N=7 Dr12&jcf7180002757844 plus
27- 0:	Dr12830	evm.model.jcf7180002757844.10	0
27- 1:	Dr12825	evm.model.jcf7180002757844.20	7e-82
27- 2:	Dr12820	evm.model.jcf7180002757844.25	9e-114
27- 3:	Dr12818	evm.model.jcf7180002757844.27	7e-10
27- 4:	Dr12814	evm.model.jcf7180002757844.32	9e-64
27- 5:	Dr12807	evm.model.jcf7180002757844.44	3e-29
27- 6:	Dr12801	evm.model.jcf7180002757844.59	0
## Alignment 28: score=255.0 e_value=7.5e-10 N=6 Dr12&jcf7180002757882 minus
28- 0:	Dr09172	evm.model.jcf7180002757882.73	4e-29
28- 1:	Dr09184	evm.model.jcf7180002757882.36	3e-164
28- 2:	Dr09186	evm.model.jcf7180002757882.34	1e-74
28- 3:	Dr09188	evm.model.jcf7180002757882.33	2e-58
28- 4:	Dr09198	evm.model.jcf7180002757882.21	1e-154
28- 5:	Dr09211	evm.model.jcf7180002757882.2	4e-67
## Alignment 29: score=407.0 e_value=1.6e-17 N=9 Dr12&jcf7180002758174 minus
29- 0:	Dr09178	evm.model.jcf7180002758174.92	1e-175
29- 1:	Dr09182	evm.model.jcf7180002758174.82	7e-67
29- 2:	Dr09183	evm.model.jcf7180002758174.81	1e-90
29- 3:	Dr09187	evm.model.jcf7180002758174.74	0
29- 4:	Dr09192	evm.model.jcf7180002758174.64	0
29- 5:	Dr09199	evm.model.jcf7180002758174.42	6e-109
29- 6:	Dr09203	evm.model.jcf7180002758174.30	0
29- 7:	Dr09211	evm.model.jcf7180002758174.14	3e-70
29- 8:	Dr09212	evm.model.jcf7180002758174.1	2e-44
## Alignment 30: score=311.0 e_value=4.7e-15 N=7 Dr12&jcf7180002766322 plus
30- 0:	Dr09115	evm.model.jcf7180002766322.4	0
30- 1:	Dr09116	evm.model.jcf7180002766322.8	5e-27
30- 2:	Dr09136	evm.model.jcf7180002766322.32	0
30- 3:	Dr09139	evm.model.jcf7180002766322.34	8e-28
30- 4:	Dr09141	evm.model.jcf7180002766322.38	0
30- 5:	Dr09142	evm.model.jcf7180002766322.39	2e-105
30- 6:	Dr09155	evm.model.jcf7180002766322.72	1e-124
## Alignment 31: score=302.0 e_value=5.7e-12 N=7 Dr12&jcf7180002766392 plus
31- 0:	Dr12769	evm.model.jcf7180002766392.14	3e-111
31- 1:	Dr12768	evm.model.jcf7180002766392.17	3e-94
31- 2:	Dr12767	evm.model.jcf7180002766392.26	1e-21
31- 3:	Dr12760	evm.model.jcf7180002766392.31	0
31- 4:	Dr12746	evm.model.jcf7180002766392.35	6e-71
31- 5:	Dr12740	evm.model.jcf7180002766392.67	1e-101
31- 6:	Dr12737	evm.model.jcf7180002766392.76	1e-10
## Alignment 32: score=266.0 e_value=3.6e-10 N=6 Dr12&jcf7180002766560 plus
32- 0:	Dr12721	evm.model.jcf7180002766560.45	0
32- 1:	Dr12715	evm.model.jcf7180002766560.62	0
32- 2:	Dr12714	evm.model.jcf7180002766560.63	9e-63
32- 3:	Dr12712	evm.model.jcf7180002766560.65	2e-22
32- 4:	Dr12709	evm.model.jcf7180002766560.71	4e-160
32- 5:	Dr12698	evm.model.jcf7180002766560.108	7e-76
## Alignment 33: score=320.0 e_value=5.3e-15 N=8 Dr12&jcf7180002766811 plus
33- 0:	Dr12830	evm.model.jcf7180002766811.27	0
33- 1:	Dr12825	evm.model.jcf7180002766811.31	9e-82
33- 2:	Dr12811	evm.model.jcf7180002766811.61	0
33- 3:	Dr12799	evm.model.jcf7180002766811.74	4e-116
33- 4:	Dr12778	evm.model.jcf7180002766811.92	0
33- 5:	Dr12770	evm.model.jcf7180002766811.101	3e-137
33- 6:	Dr12768	evm.model.jcf7180002766811.102	8e-09
33- 7:	Dr12744	evm.model.jcf7180002766811.138	0
## Alignment 34: score=310.0 e_value=4.1e-12 N=7 Dr12&jcf7180002766900 minus
34- 0:	Dr12721	evm.model.jcf7180002766900.122	0
34- 1:	Dr12719	evm.model.jcf7180002766900.119	6e-137
34- 2:	Dr12716	evm.model.jcf7180002766900.114	8e-89
34- 3:	Dr12699	evm.model.jcf7180002766900.68	2e-56
34- 4:	Dr12697	evm.model.jcf7180002766900.58	6e-13
34- 5:	Dr12695	evm.model.jcf7180002766900.50	0
34- 6:	Dr12689	evm.model.jcf7180002766900.42	0
## Alignment 35: score=547.0 e_value=2.6e-31 N=13 Dr12&jcf7180002767274 plus
35- 0:	Dr09218	evm.model.jcf7180002767274.1	3e-15
35- 1:	Dr09220	evm.model.jcf7180002767274.5	5e-51
35- 2:	Dr09229	evm.model.jcf7180002767274.16	5e-20
35- 3:	Dr19917	evm.model.jcf7180002767274.33	6e-35
35- 4:	Dr19929	evm.model.jcf7180002767274.46	5e-12
35- 5:	Dr12841	evm.model.jcf7180002767274.71	4e-51
35- 6:	Dr12840	evm.model.jcf7180002767274.74	7e-26
35- 7:	Dr12828	evm.model.jcf7180002767274.102	0
35- 8:	Dr12825	evm.model.jcf7180002767274.106	1e-20
35- 9:	Dr12824	evm.model.jcf7180002767274.108	1e-135
35- 10:	Dr12821	evm.model.jcf7180002767274.112	1e-34
35- 11:	Dr12818	evm.model.jcf7180002767274.121	1e-17
35- 12:	Dr12811	evm.model.jcf7180002767274.132	3e-68
## Alignment 36: score=263.0 e_value=2.8e-08 N=6 Dr12&jcf7180002767452 minus
36- 0:	Dr09038	evm.model.jcf7180002767452.32	4e-25
36- 1:	Dr09055	evm.model.jcf7180002767452.20	9e-14
36- 2:	Dr09061	evm.model.jcf7180002767452.19	0
36- 3:	Dr09064	evm.model.jcf7180002767452.16	2e-77
36- 4:	Dr09072	evm.model.jcf7180002767452.15	7e-97
36- 5:	Dr09080	evm.model.jcf7180002767452.11	2e-58
## Alignment 37: score=364.0 e_value=6.1e-15 N=8 Dr12&jcf7180002774796 plus
37- 0:	Dr19898	evm.model.jcf7180002774796.26	3e-145
37- 1:	Dr19899	evm.model.jcf7180002774796.28	0
37- 2:	Dr19900	evm.model.jcf7180002774796.32	2e-16
37- 3:	Dr19905	evm.model.jcf7180002774796.36	1e-52
37- 4:	Dr19908	evm.model.jcf7180002774796.39	0
37- 5:	Dr19910	evm.model.jcf7180002774796.43	9e-88
37- 6:	Dr19918	evm.model.jcf7180002774796.61	9e-94
37- 7:	Dr19932	evm.model.jcf7180002774796.96	0
## Alignment 38: score=421.0 e_value=8.1e-17 N=9 Dr13&jcf7180002759578 plus
38- 0:	Dr20771	evm.model.jcf7180002759578.210	0
38- 1:	Dr20769	evm.model.jcf7180002759578.222	3e-114
38- 2:	Dr03733	evm.model.jcf7180002759578.232	2e-109
38- 3:	Dr03731	evm.model.jcf7180002759578.235	5e-72
38- 4:	Dr03730	evm.model.jcf7180002759578.241	1e-13
38- 5:	Dr03728	evm.model.jcf7180002759578.244	2e-173
38- 6:	Dr03725	evm.model.jcf7180002759578.251	2e-66
38- 7:	Dr03724	evm.model.jcf7180002759578.261	4e-37
38- 8:	Dr03722	evm.model.jcf7180002759578.265	5e-19
## Alignment 39: score=264.0 e_value=4.6e-10 N=6 Dr13&jcf7180002759578 minus
39- 0:	Dr20797	evm.model.jcf7180002759578.307	3e-99
39- 1:	Dr20795	evm.model.jcf7180002759578.304	3e-79
39- 2:	Dr20787	evm.model.jcf7180002759578.293	5e-40
39- 3:	Dr20786	evm.model.jcf7180002759578.286	0
39- 4:	Dr20784	evm.model.jcf7180002759578.284	4e-33
39- 5:	Dr03728	evm.model.jcf7180002759578.244	2e-173
## Alignment 40: score=382.0 e_value=1.1e-14 N=8 Dr13&jcf7180002766750 minus
40- 0:	Dr10599	evm.model.jcf7180002766750.43	0
40- 1:	Dr10601	evm.model.jcf7180002766750.37	4e-58
40- 2:	Dr10603	evm.model.jcf7180002766750.36	6e-52
40- 3:	Dr10606	evm.model.jcf7180002766750.30	4e-176
40- 4:	Dr10609	evm.model.jcf7180002766750.22	0
40- 5:	Dr10611	evm.model.jcf7180002766750.21	3e-81
40- 6:	Dr10614	evm.model.jcf7180002766750.20	2e-100
40- 7:	Dr10620	evm.model.jcf7180002766750.3	3e-171
## Alignment 41: score=315.0 e_value=4e-12 N=7 Dr13&jcf7180002767727 plus
41- 0:	Dr20796	evm.model.jcf7180002767727.49	8e-08
41- 1:	Dr20781	evm.model.jcf7180002767727.56	4e-28
41- 2:	Dr20777	evm.model.jcf7180002767727.59	8e-34
41- 3:	Dr20776	evm.model.jcf7180002767727.62	0
41- 4:	Dr20767	evm.model.jcf7180002767727.81	3e-27
41- 5:	Dr03731	evm.model.jcf7180002767727.101	3e-68
41- 6:	Dr03730	evm.model.jcf7180002767727.108	3e-14
## Alignment 42: score=380.0 e_value=1.8e-14 N=8 Dr13&jcf7180002781591 minus
42- 0:	Dr10678	evm.model.jcf7180002781591.115	7e-91
42- 1:	Dr10682	evm.model.jcf7180002781591.112	2e-155
42- 2:	Dr10686	evm.model.jcf7180002781591.99	9e-26
42- 3:	Dr10688	evm.model.jcf7180002781591.93	0
42- 4:	Dr10690	evm.model.jcf7180002781591.90	2e-21
42- 5:	Dr10692	evm.model.jcf7180002781591.86	0
42- 6:	Dr10695	evm.model.jcf7180002781591.84	0
42- 7:	Dr10700	evm.model.jcf7180002781591.83	2e-53
## Alignment 43: score=417.0 e_value=5.5e-23 N=9 Dr13&jcf7180002781633 minus
43- 0:	Dr10631	evm.model.jcf7180002781633.428	3e-161
43- 1:	Dr10633	evm.model.jcf7180002781633.426	2e-28
43- 2:	Dr10635	evm.model.jcf7180002781633.425	1e-06
43- 3:	Dr10637	evm.model.jcf7180002781633.424	9e-67
43- 4:	Dr10638	evm.model.jcf7180002781633.421	8e-119
43- 5:	Dr10639	evm.model.jcf7180002781633.418	2e-25
43- 6:	Dr10641	evm.model.jcf7180002781633.416	0
43- 7:	Dr10649	evm.model.jcf7180002781633.394	2e-145
43- 8:	Dr10662	evm.model.jcf7180002781633.376	0
## Alignment 44: score=455.0 e_value=2.5e-20 N=10 Dr14&jcf7180002767105 minus
44- 0:	Dr05460	evm.model.jcf7180002767105.51	2e-84
44- 1:	Dr05459	evm.model.jcf7180002767105.45	5e-130
44- 2:	Dr05457	evm.model.jcf7180002767105.42	9e-120
44- 3:	Dr05456	evm.model.jcf7180002767105.37	1e-102
44- 4:	Dr05444	evm.model.jcf7180002767105.32	1e-149
44- 5:	Dr05426	evm.model.jcf7180002767105.17	2e-80
44- 6:	Dr05422	evm.model.jcf7180002767105.14	9e-48
44- 7:	Dr05421	evm.model.jcf7180002767105.11	2e-28
44- 8:	Dr05417	evm.model.jcf7180002767105.8	2e-147
44- 9:	Dr05414	evm.model.jcf7180002767105.4	5e-74
## Alignment 45: score=367.0 e_value=1.6e-13 N=8 Dr14&jcf7180002781536 plus
45- 0:	Dr05608	evm.model.jcf7180002781536.44	7e-131
45- 1:	Dr05607	evm.model.jcf7180002781536.48	6e-20
45- 2:	Dr05603	evm.model.jcf7180002781536.51	4e-32
45- 3:	Dr05600	evm.model.jcf7180002781536.56	0
45- 4:	Dr05596	evm.model.jcf7180002781536.64	1e-48
45- 5:	Dr05595	evm.model.jcf7180002781536.70	0
45- 6:	Dr05582	evm.model.jcf7180002781536.88	6e-68
45- 7:	Dr05581	evm.model.jcf7180002781536.91	0
## Alignment 46: score=312.0 e_value=1.2e-13 N=7 Dr15&jcf7180002757865 minus
46- 0:	Dr14090	evm.model.jcf7180002757865.113	2e-40
46- 1:	Dr14091	evm.model.jcf7180002757865.112	0
46- 2:	Dr14104	evm.model.jcf7180002757865.92	0
46- 3:	Dr14124	evm.model.jcf7180002757865.72	8e-80
46- 4:	Dr14127	evm.model.jcf7180002757865.69	4e-73
46- 5:	Dr14128	evm.model.jcf7180002757865.67	3e-116
46- 6:	Dr14133	evm.model.jcf7180002757865.59	1e-15
## Alignment 47: score=416.0 e_value=1.3e-17 N=9 Dr15&jcf7180002759575 plus
47- 0:	Dr05886	evm.model.jcf7180002759575.5	2e-23
47- 1:	Dr05888	evm.model.jcf7180002759575.6	3e-41
47- 2:	Dr05892	evm.model.jcf7180002759575.13	0
47- 3:	Dr05896	evm.model.jcf7180002759575.22	7e-109
47- 4:	Dr05897	evm.model.jcf7180002759575.23	2e-35
47- 5:	Dr05898	evm.model.jcf7180002759575.24	3e-175
47- 6:	Dr05905	evm.model.jcf7180002759575.33	0
47- 7:	Dr05910	evm.model.jcf7180002759575.50	2e-71
47- 8:	Dr05916	evm.model.jcf7180002759575.68	5e-51
## Alignment 48: score=415.0 e_value=3e-18 N=9 Dr15&jcf7180002767447 minus
48- 0:	Dr19495	evm.model.jcf7180002767447.68	3e-126
48- 1:	Dr19499	evm.model.jcf7180002767447.61	6e-143
48- 2:	Dr19502	evm.model.jcf7180002767447.58	5e-172
48- 3:	Dr19505	evm.model.jcf7180002767447.55	0
48- 4:	Dr19512	evm.model.jcf7180002767447.49	7e-85
48- 5:	Dr19524	evm.model.jcf7180002767447.23	0
48- 6:	Dr19525	evm.model.jcf7180002767447.20	0
48- 7:	Dr19526	evm.model.jcf7180002767447.19	6e-176
48- 8:	Dr19527	evm.model.jcf7180002767447.4	7e-84
## Alignment 49: score=423.0 e_value=1.7e-17 N=9 Dr15&jcf7180002767810 plus
49- 0:	Dr05881	evm.model.jcf7180002767810.29	4e-113
49- 1:	Dr05883	evm.model.jcf7180002767810.32	3e-76
49- 2:	Dr05888	evm.model.jcf7180002767810.45	9e-35
49- 3:	Dr05896	evm.model.jcf7180002767810.59	7e-47
49- 4:	Dr05899	evm.model.jcf7180002767810.66	1e-12
49- 5:	Dr05902	evm.model.jcf7180002767810.70	1e-154
49- 6:	Dr05903	evm.model.jcf7180002767810.72	0
49- 7:	Dr05904	evm.model.jcf7180002767810.74	0
49- 8:	Dr05908	evm.model.jcf7180002767810.79	0
## Alignment 50: score=344.0 e_value=4e-15 N=8 Dr15&jcf7180002767933 minus
50- 0:	Dr14151	evm.model.jcf7180002767933.58	1e-15
50- 1:	Dr14152	evm.model.jcf7180002767933.56	2e-97
50- 2:	Dr14156	evm.model.jcf7180002767933.54	1e-178
50- 3:	Dr14157	evm.model.jcf7180002767933.53	6e-36
50- 4:	Dr11076	evm.model.jcf7180002767933.40	1e-175
50- 5:	Dr11086	evm.model.jcf7180002767933.37	3e-35
50- 6:	Dr11101	evm.model.jcf7180002767933.31	0
50- 7:	Dr11109	evm.model.jcf7180002767933.22	0
## Alignment 51: score=509.0 e_value=2.1e-24 N=11 Dr15&jcf7180002780891 plus
51- 0:	Dr09688	evm.model.jcf7180002780891.10	0
51- 1:	Dr09687	evm.model.jcf7180002780891.11	1e-21
51- 2:	Dr09686	evm.model.jcf7180002780891.14	8e-99
51- 3:	Dr09685	evm.model.jcf7180002780891.16	0
51- 4:	Dr09676	evm.model.jcf7180002780891.22	0
51- 5:	Dr04326	evm.model.jcf7180002780891.29	2e-143
51- 6:	Dr04328	evm.model.jcf7180002780891.31	2e-103
51- 7:	Dr04330	evm.model.jcf7180002780891.39	2e-70
51- 8:	Dr04334	evm.model.jcf7180002780891.43	3e-112
51- 9:	Dr04335	evm.model.jcf7180002780891.50	6e-78
51- 10:	Dr04345	evm.model.jcf7180002780891.59	1e-123
## Alignment 52: score=251.0 e_value=5.4e-10 N=6 Dr15&jcf7180002781606 plus
52- 0:	Dr11190	evm.model.jcf7180002781606.80	1e-135
52- 1:	Dr11179	evm.model.jcf7180002781606.85	5e-47
52- 2:	Dr11177	evm.model.jcf7180002781606.90	3e-08
52- 3:	Dr11167	evm.model.jcf7180002781606.97	2e-65
52- 4:	Dr11163	evm.model.jcf7180002781606.99	2e-43
52- 5:	Dr11138	evm.model.jcf7180002781606.121	0
## Alignment 53: score=362.0 e_value=3.8e-17 N=8 Dr15&jcf7180002781633 plus
53- 0:	Dr11077	evm.model.jcf7180002781633.238	1e-128
53- 1:	Dr11085	evm.model.jcf7180002781633.251	0
53- 2:	Dr11094	evm.model.jcf7180002781633.263	8e-27
53- 3:	Dr11096	evm.model.jcf7180002781633.264	1e-60
53- 4:	Dr11099	evm.model.jcf7180002781633.269	0
53- 5:	Dr11103	evm.model.jcf7180002781633.272	0
53- 6:	Dr11104	evm.model.jcf7180002781633.273	2e-54
53- 7:	Dr11120	evm.model.jcf7180002781633.297	3e-18
## Alignment 54: score=562.0 e_value=3.8e-32 N=13 Dr15&jcf7180002781679 plus
54- 0:	Dr14014	evm.model.jcf7180002781679.533	3e-50
54- 1:	Dr14020	evm.model.jcf7180002781679.538	5e-49
54- 2:	Dr14025	evm.model.jcf7180002781679.552	6e-95
54- 3:	Dr14039	evm.model.jcf7180002781679.561	2e-09
54- 4:	Dr14041	evm.model.jcf7180002781679.582	4e-59
54- 5:	Dr14042	evm.model.jcf7180002781679.585	5e-145
54- 6:	Dr14053	evm.model.jcf7180002781679.598	3e-123
54- 7:	Dr14071	evm.model.jcf7180002781679.638	1e-41
54- 8:	Dr14075	evm.model.jcf7180002781679.644	1e-36
54- 9:	Dr14076	evm.model.jcf7180002781679.646	3e-72
54- 10:	Dr14079	evm.model.jcf7180002781679.660	2e-142
54- 11:	Dr14080	evm.model.jcf7180002781679.664	1e-175
54- 12:	Dr14084	evm.model.jcf7180002781679.681	4e-55
## Alignment 55: score=360.0 e_value=7.4e-16 N=8 Dr15&jcf7180002781679 plus
55- 0:	Dr09680	evm.model.jcf7180002781679.455	2e-72
55- 1:	Dr09677	evm.model.jcf7180002781679.462	1e-30
55- 2:	Dr09676	evm.model.jcf7180002781679.465	0
55- 3:	Dr09671	evm.model.jcf7180002781679.466	4e-07
55- 4:	Dr04336	evm.model.jcf7180002781679.493	2e-33
55- 5:	Dr04346	evm.model.jcf7180002781679.502	0
55- 6:	Dr04348	evm.model.jcf7180002781679.505	2e-70
55- 7:	Dr04356	evm.model.jcf7180002781679.522	5e-141
## Alignment 56: score=310.0 e_value=7e-12 N=7 Dr15&jcf7180002781737 plus
56- 0:	Dr19476	evm.model.jcf7180002781737.72	9e-136
56- 1:	Dr19478	evm.model.jcf7180002781737.75	0
56- 2:	Dr19490	evm.model.jcf7180002781737.80	0
56- 3:	Dr19497	evm.model.jcf7180002781737.90	0
56- 4:	Dr19502	evm.model.jcf7180002781737.95	4e-141
56- 5:	Dr19511	evm.model.jcf7180002781737.102	1e-15
56- 6:	Dr19513	evm.model.jcf7180002781737.125	0
## Alignment 57: score=257.0 e_value=2.3e-09 N=6 Dr15&jcf7180002781737 minus
57- 0:	Dr19511	evm.model.jcf7180002781737.102	1e-15
57- 1:	Dr20851	evm.model.jcf7180002781737.75	0
57- 2:	Dr09712	evm.model.jcf7180002781737.72	0
57- 3:	Dr09697	evm.model.jcf7180002781737.57	0
57- 4:	Dr09695	evm.model.jcf7180002781737.48	1e-13
57- 5:	Dr09693	evm.model.jcf7180002781737.38	8e-75
## Alignment 58: score=322.0 e_value=4.8e-12 N=7 Dr15&jcf7180002781778 minus
58- 0:	Dr11078	evm.model.jcf7180002781778.45	7e-48
58- 1:	Dr11085	evm.model.jcf7180002781778.44	8e-12
58- 2:	Dr11098	evm.model.jcf7180002781778.33	9e-84
58- 3:	Dr11099	evm.model.jcf7180002781778.30	0
58- 4:	Dr11102	evm.model.jcf7180002781778.27	1e-110
58- 5:	Dr11110	evm.model.jcf7180002781778.15	0
58- 6:	Dr11112	evm.model.jcf7180002781778.11	0
## Alignment 59: score=287.0 e_value=5.5e-09 N=6 Dr16&jcf7180002757980 minus
59- 0:	Dr03013	evm.model.jcf7180002757980.26	0
59- 1:	Dr03006	evm.model.jcf7180002757980.19	9e-17
59- 2:	Dr03003	evm.model.jcf7180002757980.14	5e-123
59- 3:	Dr02999	evm.model.jcf7180002757980.8	0
59- 4:	Dr02998	evm.model.jcf7180002757980.5	0
59- 5:	Dr02997	evm.model.jcf7180002757980.4	3e-104
## Alignment 60: score=321.0 e_value=5.5e-14 N=8 Dr16&jcf7180002766522 plus
60- 0:	Dr16986	evm.model.jcf7180002766522.104	0
60- 1:	Dr16978	evm.model.jcf7180002766522.109	0
60- 2:	Dr16968	evm.model.jcf7180002766522.114	0
60- 3:	Dr16949	evm.model.jcf7180002766522.120	5e-48
60- 4:	Dr16941	evm.model.jcf7180002766522.136	0
60- 5:	Dr16940	evm.model.jcf7180002766522.150	2e-84
60- 6:	Dr16919	evm.model.jcf7180002766522.158	2e-103
60- 7:	Dr16913	evm.model.jcf7180002766522.165	2e-67
## Alignment 61: score=276.0 e_value=7.8e-11 N=6 Dr16&jcf7180002766523 minus
61- 0:	Dr16967	evm.model.jcf7180002766523.51	0
61- 1:	Dr16954	evm.model.jcf7180002766523.30	0
61- 2:	Dr16952	evm.model.jcf7180002766523.26	1e-42
61- 3:	Dr16943	evm.model.jcf7180002766523.20	0
61- 4:	Dr16942	evm.model.jcf7180002766523.19	3e-35
61- 5:	Dr16941	evm.model.jcf7180002766523.17	0
## Alignment 62: score=370.0 e_value=1.6e-14 N=8 Dr16&jcf7180002766540 minus
62- 0:	Dr00941	evm.model.jcf7180002766540.84	5e-36
62- 1:	Dr00937	evm.model.jcf7180002766540.77	0
62- 2:	Dr00935	evm.model.jcf7180002766540.73	6e-48
62- 3:	Dr00932	evm.model.jcf7180002766540.70	2e-42
62- 4:	Dr00933	evm.model.jcf7180002766540.65	2e-53
62- 5:	Dr00926	evm.model.jcf7180002766540.57	0
62- 6:	Dr00915	evm.model.jcf7180002766540.33	6e-47
62- 7:	Dr00911	evm.model.jcf7180002766540.24	8e-40
## Alignment 63: score=555.0 e_value=6.8e-30 N=13 Dr16&jcf7180002781327 plus
63- 0:	Dr03051	evm.model.jcf7180002781327.90	2e-61
63- 1:	Dr03048	evm.model.jcf7180002781327.97	1e-100
63- 2:	Dr03047	evm.model.jcf7180002781327.99	0
63- 3:	Dr03037	evm.model.jcf7180002781327.114	3e-83
63- 4:	Dr03032	evm.model.jcf7180002781327.135	1e-112
63- 5:	Dr03006	evm.model.jcf7180002781327.167	9e-30
63- 6:	Dr03002	evm.model.jcf7180002781327.175	1e-51
63- 7:	Dr02993	evm.model.jcf7180002781327.194	1e-123
63- 8:	Dr02989	evm.model.jcf7180002781327.203	0
63- 9:	Dr02982	evm.model.jcf7180002781327.217	2e-96
63- 10:	Dr02970	evm.model.jcf7180002781327.248	0
63- 11:	Dr02969	evm.model.jcf7180002781327.252	0
63- 12:	Dr02964	evm.model.jcf7180002781327.268	0
## Alignment 64: score=298.0 e_value=9.9e-12 N=7 Dr16&jcf7180002781542 minus
64- 0:	Dr10356	evm.model.jcf7180002781542.157	2e-169
64- 1:	Dr10376	evm.model.jcf7180002781542.124	2e-48
64- 2:	Dr10378	evm.model.jcf7180002781542.113	0
64- 3:	Dr01014	evm.model.jcf7180002781542.100	5e-128
64- 4:	Dr01010	evm.model.jcf7180002781542.94	0
64- 5:	Dr01001	evm.model.jcf7180002781542.74	5e-56
64- 6:	Dr00994	evm.model.jcf7180002781542.68	4e-31
## Alignment 65: score=273.0 e_value=1.9e-09 N=6 Dr16&jcf7180002781608 minus
65- 0:	Dr00896	evm.model.jcf7180002781608.78	3e-122
65- 1:	Dr00893	evm.model.jcf7180002781608.68	2e-104
65- 2:	Dr00882	evm.model.jcf7180002781608.63	5e-104
65- 3:	Dr00879	evm.model.jcf7180002781608.59	0
65- 4:	Dr00871	evm.model.jcf7180002781608.38	4e-54
65- 5:	Dr00869	evm.model.jcf7180002781608.34	4e-42
## Alignment 66: score=1147.0 e_value=2.8e-83 N=26 Dr16&jcf7180002781679 plus
66- 0:	Dr16988	evm.model.jcf7180002781679.10	1e-168
66- 1:	Dr16987	evm.model.jcf7180002781679.12	9e-144
66- 2:	Dr16973	evm.model.jcf7180002781679.41	1e-44
66- 3:	Dr16971	evm.model.jcf7180002781679.47	2e-123
66- 4:	Dr16962	evm.model.jcf7180002781679.82	0
66- 5:	Dr16961	evm.model.jcf7180002781679.91	2e-43
66- 6:	Dr16960	evm.model.jcf7180002781679.92	0
66- 7:	Dr16944	evm.model.jcf7180002781679.128	1e-07
66- 8:	Dr16943	evm.model.jcf7180002781679.129	0
66- 9:	Dr16939	evm.model.jcf7180002781679.138	2e-33
66- 10:	Dr16921	evm.model.jcf7180002781679.166	0
66- 11:	Dr16915	evm.model.jcf7180002781679.177	0
66- 12:	Dr16914	evm.model.jcf7180002781679.182	8e-35
66- 13:	Dr16911	evm.model.jcf7180002781679.188	4e-12
66- 14:	Dr16909	evm.model.jcf7180002781679.199	3e-145
66- 15:	Dr16907	evm.model.jcf7180002781679.206	8e-21
66- 16:	Dr16906	evm.model.jcf7180002781679.208	1e-113
66- 17:	Dr16905	evm.model.jcf7180002781679.210	3e-80
66- 18:	Dr16903	evm.model.jcf7180002781679.212	4e-10
66- 19:	Dr16900	evm.model.jcf7180002781679.218	2e-21
66- 20:	Dr16894	evm.model.jcf7180002781679.226	4e-20
66- 21:	Dr16890	evm.model.jcf7180002781679.236	0
66- 22:	Dr16883	evm.model.jcf7180002781679.250	3e-20
66- 23:	Dr16869	evm.model.jcf7180002781679.261	6e-151
66- 24:	Dr16868	evm.model.jcf7180002781679.263	0
66- 25:	Dr16866	evm.model.jcf7180002781679.268	1e-56
## Alignment 67: score=284.0 e_value=5.7e-12 N=7 Dr17&jcf7180002766494 plus
67- 0:	Dr06923	evm.model.jcf7180002766494.44	2e-89
67- 1:	Dr06942	evm.model.jcf7180002766494.87	0
67- 2:	Dr06946	evm.model.jcf7180002766494.110	0
67- 3:	Dr06956	evm.model.jcf7180002766494.128	3e-83
67- 4:	Dr06958	evm.model.jcf7180002766494.146	0
67- 5:	Dr06960	evm.model.jcf7180002766494.155	1e-171
67- 6:	Dr06963	evm.model.jcf7180002766494.156	6e-29
## Alignment 68: score=309.0 e_value=5.9e-14 N=7 Dr17&jcf7180002766573 minus
68- 0:	Dr05185	evm.model.jcf7180002766573.109	3e-177
[truncated: 1,175 more rows]
